# Supplementary material for: A fast and cost-effective microsampling protocol incorporating reduced animal usage for time-series transcriptomics in rodent malaria parasites
Source: PubMed Central journal article supplement (PMC6347755; doi:10.1186/s12936-019-2659-4), 2019-01-25
Supplement: 12936_2019_2659_MOESM1_ESM.pdf [file 12936_2019_2659_MOESM1_ESM.pdf]

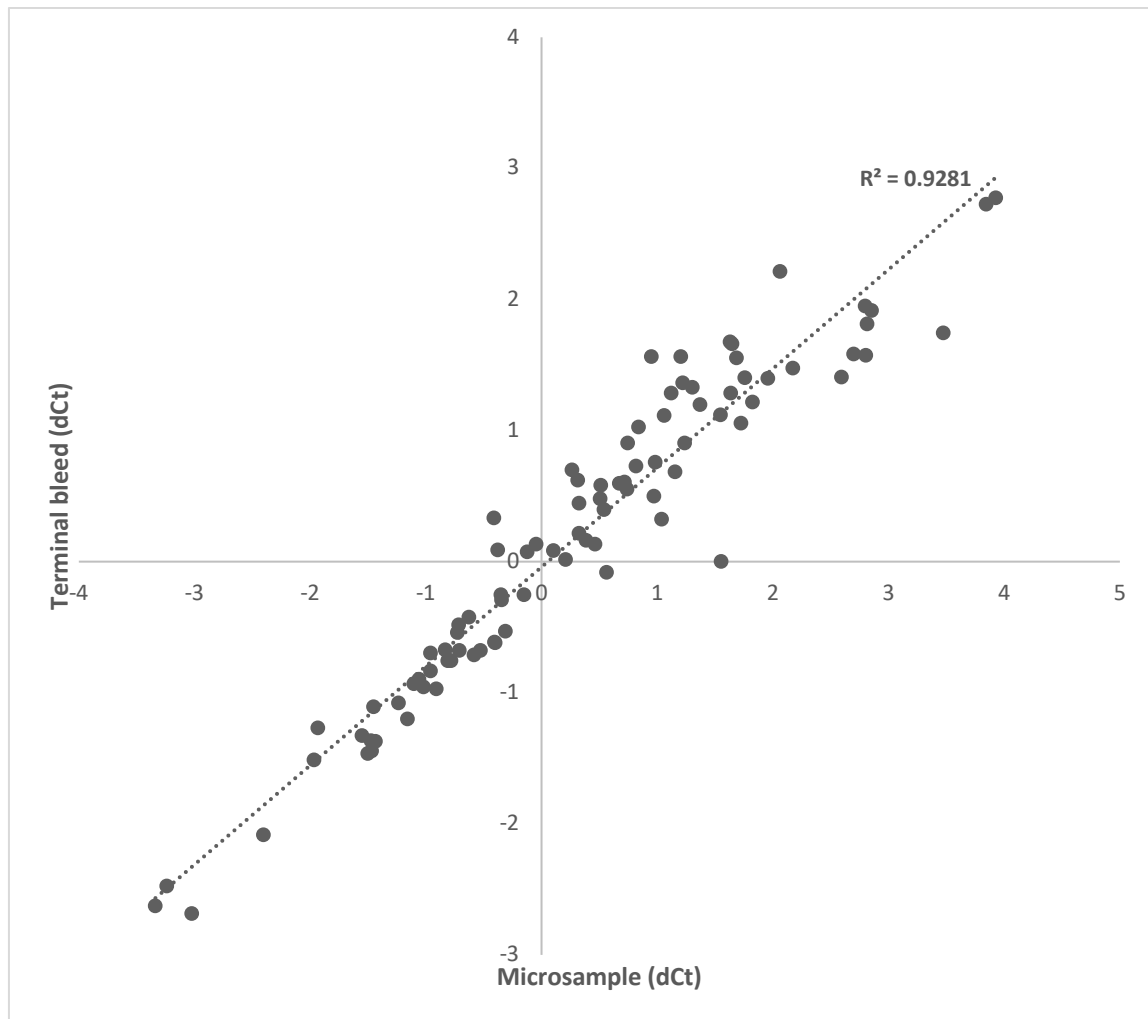

**Additional file 1. Correlation between microsamples and terminally bled samples.**

Scatter plot comparing expression values of 91 genes as measured by real-time qPCR between microsamples and terminally bled samples ( $dC_t$  = Cycle threshold of particular gene – Cycle threshold of housekeeping gene).
