# Supplementary material for: A fast and cost-effective microsampling protocol incorporating reduced animal usage for time-series transcriptomics in rodent malaria parasites
Source: PubMed Central journal article supplement (PMC6347755; doi:10.1186/s12936-019-2659-4), 2019-01-25
Supplement: 12936_2019_2659_MOESM3_ESM.pdf [file 12936_2019_2659_MOESM3_ESM.pdf]

**Additional file 3.** Gene expression data of *P. vinckei*. FPKM values of *P. vinckei* genes

ordered according to their phase of expression.

| gene_id       | 6h     | 12h    | 18h    | 24h    | phase | Product                                                  |
|---------------|--------|--------|--------|--------|-------|----------------------------------------------------------|
| PVVCY_0401330 | 8.765  | 8.223  | 7.706  | 7.977  | 0.002 | serine_threonine protein phosphatase 6, putative         |
| PVVCY_1301500 | 5.199  | 4.816  | 4.453  | 4.742  | 0.006 | exosome complex exonuclease RRP6, putative               |
| PVVCY_1000890 | 4.585  | 4.104  | 3.653  | 4.194  | 0.006 | conserved Plasmodium protein, unknown function           |
| PVVCY_1101500 | 5.947  | 5.416  | 4.919  | 5.525  | 0.008 | conserved Plasmodium protein, unknown function           |
| PVVCY_1102990 | 5.816  | 5.291  | 4.793  | 5.312  | 0.013 | CPW-WPC family protein                                   |
| PVVCY_0601100 | 9.833  | 9.492  | 9.159  | 9.120  | 0.016 | HSP40, subfamily A, putative                             |
| PVVCY_0502470 | 12.297 | 11.926 | 11.578 | 12.109 | 0.016 | early transcribed membrane protein                       |
| PVVCY_0501260 | 6.192  | 5.322  | 4.493  | 5.246  | 0.019 | methyltransferase, putative                              |
| PVVCY_1101020 | 5.509  | 5.142  | 4.791  | 5.131  | 0.023 | conserved Plasmodium protein, unknown function           |
| PVVCY_0902020 | 6.218  | 5.598  | 4.999  | 5.421  | 0.025 | cupin-like protein, putative                             |
| PVVCY_0902730 | 5.374  | 4.538  | 3.767  | 5.985  | 0.027 | fam-d protein, fragment                                  |
| PVVCY_1202990 | 3.171  | 2.809  | 2.470  | 3.233  | 0.027 | von Willebrand factor A domain-related protein, putative |
| PVVCY_0902810 | 6.898  | 6.127  | 5.380  | 5.788  | 0.030 | rRNA (cytosine-C(5))-methyltransferase, putative         |
| PVVCY_0500620 | 6.131  | 5.661  | 5.213  | 5.886  | 0.030 | ATP-dependent RNA helicase ROK1, putative                |
| PVVCY_0301730 | 2.037  | 1.235  | 0.479  | 2.105  | 0.032 | fam-b protein                                            |
| PVVCY_1403230 | 6.160  | 5.790  | 5.441  | 6.285  | 0.034 | conserved Plasmodium protein, unknown function           |
| PVVCY_0100580 | 5.351  | 4.901  | 4.471  | 5.260  | 0.035 | conserved Plasmodium protein, unknown function           |
| PVVCY_1305470 | 11.221 | 11.127 | 10.273 | 10.550 | 0.037 | 60S ribosomal protein L6-2, putative                     |
| PVVCY_1002450 | 6.658  | 6.449  | 5.336  | 5.566  | 0.040 | vacuolar protein sorting-associated protein 3, putative  |
| PVVCY_0600760 | 7.696  | 7.126  | 6.572  | 7.119  | 0.044 | zinc finger protein, putative                            |
| PVVCY_0401460 | 3.118  | 3.024  | 2.936  | 3.544  | 0.054 | conserved Plasmodium protein, unknown function           |
| PVVCY_1104140 | 6.112  | 5.610  | 5.114  | 5.407  | 0.056 | conserved Plasmodium protein, unknown function           |
| PVVCY_0701460 | 7.164  | 6.283  | 5.405  | 6.529  | 0.072 | ribosome assembly protein RRB1, putative                 |

|               |        |        |        |        |       |                                                                                 |
|---------------|--------|--------|--------|--------|-------|---------------------------------------------------------------------------------|
| PVVCY_1003190 | 8.317  | 7.768  | 7.221  | 7.650  | 0.073 | protein SEY1, putative                                                          |
| PVVCY_1305570 | 8.829  | 8.426  | 8.023  | 8.419  | 0.075 | conserved Plasmodium protein, unknown function                                  |
| PVVCY_0802270 | 4.474  | 4.467  | 3.865  | 4.142  | 0.075 | thiamine pyrophosphokinase, putative                                            |
| PVVCY_1101690 | 6.994  | 6.940  | 6.550  | 6.657  | 0.077 | TRAP-like protein, putative                                                     |
| PVVCY_0401290 | 7.919  | 7.701  | 7.482  | 8.183  | 0.077 | vesicle transport v-SNARE protein, putative                                     |
| PVVCY_1203250 | 6.464  | 5.720  | 4.972  | 6.213  | 0.078 | transcription factor with AP2 domain(s), putative                               |
| PVVCY_0600190 | 7.247  | 7.134  | 7.021  | 7.510  | 0.078 | conserved Plasmodium protein, unknown function                                  |
| PVVCY_1306090 | 7.750  | 7.127  | 6.500  | 6.891  | 0.082 | conserved Plasmodium protein, unknown function                                  |
| PVVCY_0400950 | 7.550  | 7.668  | 6.806  | 7.387  | 0.083 | trafficking protein particle complex subunit 4, putative                        |
| PVVCY_1000110 | 8.050  | 7.279  | 6.496  | 8.109  | 0.086 | lysophospholipase, putative                                                     |
| PVVCY_0600690 | 5.165  | 4.352  | 3.530  | 4.242  | 0.088 | conserved Plasmodium protein, unknown function                                  |
| PVVCY_0200670 | 7.372  | 6.770  | 6.161  | 6.553  | 0.088 | pre-rRNA-processing protein TSR2, putative                                      |
| PVVCY_0702170 | 4.407  | 4.412  | 4.411  | 4.966  | 0.100 | phosphatidylinositol 4-kinase, putative                                         |
| PVVCY_0300520 | 7.136  | 7.099  | 6.265  | 6.600  | 0.104 | DNA-directed RNA polymerase III subunit RPC10, putative                         |
| PVVCY_1304670 | 6.653  | 6.058  | 5.451  | 5.661  | 0.106 | DNA-directed RNA polymerase III subunit RPC1, putative                          |
| PVVCY_1404140 | 6.340  | 5.728  | 5.100  | 5.526  | 0.110 | conserved Plasmodium protein, unknown function                                  |
| PVVCY_1405900 | 12.088 | 12.317 | 12.544 | 12.850 | 0.114 | translation initiation factor SUI1, putative                                    |
| PVVCY_1103520 | 6.840  | 6.226  | 5.595  | 5.929  | 0.116 | U3 small nucleolar RNA-associated protein 21, putative                          |
| PVVCY_0801120 | 6.420  | 6.202  | 5.424  | 5.465  | 0.117 | tRNA (adenine(58)-N(1))-methyltransferase non- catalytic subunit TRM6, putative |
| PVVCY_0903290 | 6.379  | 5.804  | 5.207  | 5.737  | 0.119 | conserved Plasmodium protein, unknown function                                  |
| PVVCY_0802420 | 15.285 | 14.236 | 13.144 | 14.222 | 0.121 | conserved Plasmodium protein, unknown function                                  |
| PVVCY_1202000 | 5.747  | 5.425  | 5.085  | 5.548  | 0.126 | inner membrane complex protein 1d, putative                                     |
| PVVCY_1202970 | 6.631  | 6.132  | 5.602  | 6.272  | 0.134 | nucleolar protein 10, putative                                                  |
| PVVCY_1406340 | 6.171  | 5.709  | 5.212  | 6.023  | 0.139 | conserved Plasmodium protein, unknown function                                  |
| PVVCY_0602320 | 6.091  | 5.475  | 4.826  | 5.316  | 0.140 | conserved Plasmodium protein, unknown function                                  |
| PVVCY_1400100 | 1.604  | 1.194  | 0.716  | 2.530  | 0.143 | fam-a protein                                                                   |
| PVVCY_0800770 | 7.326  | 7.071  | 6.789  | 7.346  | 0.149 | zinc finger protein, putative                                                   |

|               |       |       |       |       |       |                                                              |
|---------------|-------|-------|-------|-------|-------|--------------------------------------------------------------|
| PVVCY_0200860 | 8.099 | 7.400 | 6.633 | 7.890 | 0.154 | ubiquitin carboxyl-terminal hydrolase 1, putative            |
| PVVCY_0600880 | 6.183 | 5.969 | 5.725 | 6.400 | 0.154 | SNARE protein, putative                                      |
| PVVCY_1202420 | 9.849 | 9.123 | 8.358 | 8.690 | 0.159 | ras-related protein Rab-18, putative                         |
| PVVCY_1002920 | 6.779 | 6.327 | 5.836 | 6.389 | 0.162 | ATP-dependent RNA helicase DBP4, putative                    |
| PVVCY_0301250 | 8.596 | 8.008 | 7.368 | 8.024 | 0.168 | conserved Plasmodium protein, unknown function               |
| PVVCY_1306580 | 2.484 | 1.868 | 1.162 | 2.678 | 0.170 | conserved Plasmodium protein, unknown function               |
| PVVCY_0100940 | 6.368 | 5.532 | 4.638 | 5.147 | 0.171 | mitochondrial cardiolipin synthase, putative                 |
| PVVCY_1001050 | 7.546 | 7.048 | 6.529 | 6.516 | 0.176 | GTPase-activating protein, putative                          |
| PVVCY_1103650 | 5.341 | 4.674 | 3.948 | 4.574 | 0.176 | conserved Plasmodium protein, unknown function               |
| PVVCY_0101010 | 7.811 | 7.513 | 7.185 | 7.521 | 0.179 | RNA-binding protein 25, putative                             |
| PVVCY_1406650 | 6.331 | 5.745 | 5.083 | 6.107 | 0.181 | ATP-dependent RNA helicase DRS1, putative                    |
| PVVCY_1300660 | 5.628 | 5.506 | 4.191 | 4.596 | 0.189 | cytoplasmic tRNA 2-thiolation protein 2, putative            |
| PVVCY_0800600 | 5.748 | 5.374 | 4.949 | 5.575 | 0.192 | conserved Plasmodium protein, unknown function               |
| PVVCY_1104450 | 7.097 | 6.574 | 5.968 | 6.945 | 0.199 | ribosome biogenesis protein MRT4, putative                   |
| PVVCY_0700910 | 5.921 | 6.078 | 4.991 | 5.694 | 0.199 | ribosomal RNA small subunit methyltransferase NEP1, putative |
| PVVCY_0301600 | 6.873 | 6.523 | 6.129 | 6.561 | 0.203 | ATP-dependent RNA helicase DDX47, putative                   |
| PVVCY_0802160 | 6.522 | 5.792 | 4.990 | 5.468 | 0.206 | nitric oxide synthase, putative                              |
| PVVCY_1200780 | 8.880 | 8.157 | 7.336 | 8.230 | 0.211 | nucleolar protein 5, putative                                |
| PVVCY_1204430 | 5.959 | 6.098 | 5.024 | 5.691 | 0.214 | nucleolar preribosomal GTPase, putative                      |
| PVVCY_0601910 | 6.103 | 5.716 | 5.290 | 5.530 | 0.217 | ATP-dependent RNA helicase DBP7, putative                    |
| PVVCY_0701910 | 5.582 | 5.268 | 4.908 | 5.319 | 0.218 | LETM1-like protein, putative                                 |
| PVVCY_1201950 | 2.213 | 1.690 | 1.042 | 2.454 | 0.219 | conserved Plasmodium protein, unknown function               |
| PVVCY_0902720 | 9.086 | 8.361 | 7.483 | 9.093 | 0.220 | fam-d protein                                                |
| PVVCY_0902740 | 7.703 | 6.934 | 5.990 | 7.855 | 0.223 | fam-d protein                                                |
| PVVCY_1401890 | 4.866 | 4.377 | 3.830 | 4.200 | 0.223 | conserved Plasmodium protein, unknown function               |
| PVVCY_1201580 | 6.508 | 6.532 | 6.528 | 6.995 | 0.224 | survival motor neuron-like protein, putative                 |
| PVVCY_1202130 | 8.892 | 8.475 | 8.039 | 7.877 | 0.232 | conserved protein, unknown function                          |

|               |        |       |       |       |       |                                                                         |
|---------------|--------|-------|-------|-------|-------|-------------------------------------------------------------------------|
| PVVCY_0801240 | 4.705  | 4.412 | 3.821 | 3.655 | 0.232 | pseudouridylate synthase, putative                                      |
| PVVCY_1300980 | 2.561  | 2.195 | 1.706 | 3.060 | 0.233 | calmodulin-like protein                                                 |
| PVVCY_0800030 | 3.275  | 2.639 | 1.885 | 2.904 | 0.234 | fam-a protein                                                           |
| PVVCY_1302000 | 5.614  | 5.223 | 4.759 | 5.371 | 0.235 | conserved Plasmodium protein, unknown function                          |
| PVVCY_1406500 | 7.321  | 7.015 | 6.618 | 7.545 | 0.238 | rRNA-processing protein, putative                                       |
| PVVCY_1405400 | 5.655  | 4.977 | 4.172 | 5.130 | 0.247 | conserved Plasmodium protein, unknown function                          |
| PVVCY_1103070 | 1.913  | 1.533 | 1.001 | 2.573 | 0.248 | conserved Plasmodium protein, unknown function                          |
| PVVCY_1102530 | 5.298  | 4.675 | 3.871 | 5.430 | 0.258 | conserved Plasmodium protein, unknown function                          |
| PVVCY_1202180 | 7.355  | 6.784 | 6.124 | 6.593 | 0.263 | conserved Plasmodium protein, unknown function                          |
| PVVCY_0600560 | 7.589  | 6.987 | 6.304 | 6.636 | 0.266 | DNA-directed RNA polymerase III subunit RPC2, putative                  |
| PVVCY_0201070 | 6.969  | 6.855 | 6.334 | 6.390 | 0.267 | mitochondrial import inner membrane translocase subunit TIM50, putative |
| PVVCY_0904430 | 6.563  | 6.044 | 5.408 | 6.169 | 0.278 | ribosome assembly protein 4, putative                                   |
| PVVCY_0601290 | 5.251  | 4.870 | 4.468 | 4.315 | 0.278 | DEAD box ATP-dependent RNA helicase, putative                           |
| PVVCY_0300530 | 7.114  | 6.465 | 5.766 | 5.668 | 0.280 | adenylosuccinate lyase, putative                                        |
| PVVCY_0802060 | 10.157 | 9.420 | 8.521 | 9.508 | 0.284 | S-adenosylmethionine synthetase, putative                               |
| PVVCY_1201230 | 6.300  | 5.719 | 5.040 | 5.477 | 0.288 | U3 small nucleolar RNA-associated protein 13, putative                  |
| PVVCY_1003050 | 8.532  | 7.957 | 7.259 | 7.947 | 0.289 | H_ACA ribonucleoprotein complex subunit 4, putative                     |
| PVVCY_0600080 | 4.868  | 4.933 | 4.179 | 4.583 | 0.291 | NIMA related kinase 3, putative                                         |
| PVVCY_1202190 | 5.209  | 5.226 | 4.505 | 4.828 | 0.292 | DNA repair protein RAD14, putative                                      |
| PVVCY_1401100 | 6.856  | 6.308 | 5.675 | 5.976 | 0.297 | conserved Plasmodium protein, unknown function                          |
| PVVCY_1100290 | 6.788  | 6.406 | 5.934 | 6.437 | 0.300 | protein Mpv17, putative                                                 |
| PVVCY_1401560 | 9.724  | 9.331 | 8.814 | 9.620 | 0.302 | conserved Plasmodium protein, unknown function                          |
| PVVCY_0301530 | 7.155  | 7.017 | 6.559 | 6.552 | 0.306 | E2F-associated phosphoprotein, putative                                 |
| PVVCY_1000290 | 5.022  | 4.534 | 3.974 | 4.169 | 0.309 | conserved Plasmodium protein, unknown function                          |
| PVVCY_1002830 | 7.811  | 7.061 | 6.213 | 6.380 | 0.311 | glutathione reductase, putative                                         |
| PVVCY_1405020 | 6.771  | 6.734 | 5.830 | 6.146 | 0.312 | conserved Plasmodium protein, unknown function                          |
| PVVCY_1405360 | 4.775  | 4.458 | 4.080 | 4.320 | 0.314 | protein-S-isoprenylcysteine O-methyltransferase, putative               |

|               |        |        |       |        |       |                                                     |
|---------------|--------|--------|-------|--------|-------|-----------------------------------------------------|
| PVVCY_0803220 | 3.959  | 3.924  | 3.348 | 3.533  | 0.317 | delta tubulin, putative                             |
| PVVCY_0501300 | 6.753  | 6.100  | 5.244 | 6.441  | 0.318 | nucleolar preribosomal assembly protein, putative   |
| PVVCY_0500240 | 2.993  | 2.691  | 2.274 | 2.984  | 0.326 | conserved Plasmodium protein, unknown function      |
| PVVCY_0101490 | 9.716  | 9.238  | 8.664 | 9.021  | 0.327 | haloacid dehalogenase-like hydrolase, putative      |
| PVVCY_1202730 | 5.011  | 4.563  | 3.922 | 5.150  | 0.328 | conserved Plasmodium protein, unknown function      |
| PVVCY_0400080 | 9.662  | 8.580  | 7.204 | 8.679  | 0.328 | fam-a protein                                       |
| PVVCY_0201100 | 6.228  | 5.976  | 5.299 | 5.218  | 0.331 | cysteine desulfurase, putative                      |
| PVVCY_0501550 | 10.324 | 10.061 | 9.697 | 10.259 | 0.343 | 25 kDa ookinete surface antigen precursor, putative |
| PVVCY_1000780 | 7.389  | 6.779  | 6.057 | 6.359  | 0.344 | conserved Plasmodium protein, unknown function      |
| PVVCY_0200570 | 8.516  | 8.215  | 7.791 | 8.464  | 0.350 | lipid_sterol:H+ symporter, putative                 |
| PVVCY_0802690 | 4.994  | 4.293  | 3.269 | 5.131  | 0.350 | conserved Plasmodium protein, unknown function      |
| PVVCY_1402270 | 6.731  | 6.387  | 5.965 | 6.244  | 0.352 | conserved Plasmodium protein, unknown function      |
| PVVCY_0600940 | 7.090  | 6.562  | 5.849 | 6.781  | 0.353 | conserved Plasmodium protein, unknown function      |
| PVVCY_1304180 | 5.027  | 4.328  | 3.429 | 4.294  | 0.354 | conserved Plasmodium protein, unknown function      |
| PVVCY_1204040 | 6.568  | 5.755  | 4.773 | 5.273  | 0.355 | conserved Plasmodium protein, unknown function      |
| PVVCY_1103480 | 2.357  | 1.404  | 0.000 | 2.541  | 0.357 | dynein light chain, putative                        |
| PVVCY_0502210 | 6.570  | 6.160  | 5.572 | 6.536  | 0.358 | serine_threonine protein kinase RIO2, putative      |
| PVVCY_1405320 | 5.509  | 5.067  | 4.457 | 5.312  | 0.359 | conserved Plasmodium protein, unknown function      |
| PVVCY_1202680 | 4.191  | 4.028  | 3.771 | 4.325  | 0.360 | conserved Plasmodium protein, unknown function      |
| PVVCY_0400460 | 7.774  | 7.268  | 6.688 | 6.758  | 0.361 | conserved Plasmodium protein, unknown function      |
| PVVCY_0400230 | 7.036  | 6.757  | 6.020 | 5.920  | 0.388 | conserved Plasmodium protein, unknown function      |
| PVVCY_0802950 | 5.049  | 4.969  | 3.871 | 4.183  | 0.401 | elongation factor Tu, putative                      |
| PVVCY_0701200 | 9.803  | 9.233  | 8.578 | 8.644  | 0.413 | BEM46-like protein, putative                        |
| PVVCY_1103200 | 8.065  | 7.580  | 6.895 | 7.888  | 0.414 | methyltransferase, putative                         |
| PVVCY_0902100 | 6.908  | 6.439  | 5.739 | 6.906  | 0.427 | conserved Plasmodium protein, unknown function      |
| PVVCY_0903180 | 6.344  | 5.780  | 5.047 | 5.684  | 0.428 | conserved Plasmodium protein, unknown function      |
| PVVCY_0901170 | 9.532  | 9.287  | 8.914 | 9.577  | 0.430 | protein tyrosine phosphatase, putative              |

|               |       |       |       |       |       |                                                             |
|---------------|-------|-------|-------|-------|-------|-------------------------------------------------------------|
| PVVCY_1402610 | 9.344 | 8.868 | 8.216 | 8.952 | 0.433 | conserved Plasmodium protein, unknown function              |
| PVVCY_1302280 | 6.379 | 6.086 | 5.663 | 6.276 | 0.434 | conserved Plasmodium protein, unknown function              |
| PVVCY_0900240 | 9.072 | 8.433 | 7.485 | 8.981 | 0.435 | fam-b protein                                               |
| PVVCY_1404250 | 6.738 | 6.053 | 5.113 | 6.172 | 0.437 | small subunit rRNA processing factor, putative              |
| PVVCY_0904750 | 2.668 | 2.261 | 1.569 | 3.108 | 0.438 | fam-a protein                                               |
| PVVCY_0800300 | 5.923 | 5.378 | 4.640 | 5.411 | 0.438 | ATP-dependent RNA helicase DDX51, putative                  |
| PVVCY_0700360 | 6.857 | 6.450 | 5.881 | 6.576 | 0.441 | ATP-dependent RNA helicase DBP10, putative                  |
| PVVCY_0801710 | 7.297 | 6.742 | 6.069 | 6.293 | 0.446 | dihydrouridine synthase, putative                           |
| PVVCY_0400090 | 7.150 | 6.665 | 6.048 | 6.434 | 0.450 | fam-a protein                                               |
| PVVCY_1402500 | 6.581 | 6.126 | 5.442 | 6.466 | 0.456 | ATPase, putative                                            |
| PVVCY_0903520 | 6.378 | 6.534 | 4.678 | 5.584 | 0.458 | conserved Plasmodium protein, unknown function              |
| PVVCY_0701150 | 6.522 | 5.991 | 5.219 | 6.226 | 0.460 | BRIX domain, putative                                       |
| PVVCY_0903670 | 7.031 | 6.971 | 5.888 | 6.209 | 0.461 | ubiquitin-related modifier 1, putative                      |
| PVVCY_0801310 | 9.788 | 8.567 | 6.889 | 8.549 | 0.462 | major facilitator superfamily-related transporter, putative |
| PVVCY_1401510 | 7.470 | 7.254 | 6.961 | 7.224 | 0.466 | conserved Plasmodium protein, unknown function              |
| PVVCY_0901740 | 6.466 | 6.013 | 5.379 | 6.054 | 0.466 | conserved protein, unknown function                         |
| PVVCY_1004560 | 6.761 | 6.093 | 5.114 | 6.364 | 0.470 | fam-b protein                                               |
| PVVCY_1303250 | 1.224 | 1.104 | 0.796 | 1.844 | 0.470 | conserved Plasmodium protein, unknown function              |
| PVVCY_0802730 | 9.076 | 8.148 | 6.747 | 8.737 | 0.470 | guanylate kinase, putative                                  |
| PVVCY_0401970 | 7.300 | 6.781 | 6.076 | 6.688 | 0.475 | lysophospholipase, putative                                 |
| PVVCY_0803310 | 5.858 | 5.812 | 5.613 | 6.497 | 0.475 | conserved Plasmodium protein, unknown function              |
| PVVCY_0800540 | 6.409 | 6.376 | 5.602 | 5.842 | 0.477 | mitochondrial carrier protein, putative                     |
| PVVCY_1103700 | 3.971 | 3.395 | 2.508 | 3.801 | 0.478 | conserved Plasmodium protein, unknown function              |
| PVVCY_1302530 | 4.643 | 4.162 | 3.470 | 4.249 | 0.481 | kelch domain-containing protein, putative                   |
| PVVCY_0502640 | 3.505 | 2.833 | 1.711 | 3.680 | 0.487 | fam-b protein                                               |
| PVVCY_0702160 | 7.043 | 6.782 | 6.351 | 7.061 | 0.499 | 60S ribosomal protein L7ae/L30e, putative                   |
| PVVCY_0902450 | 6.610 | 5.960 | 5.092 | 5.681 | 0.499 | conserved Plasmodium protein, unknown function              |

|               |       |       |       |       |       |                                                              |
|---------------|-------|-------|-------|-------|-------|--------------------------------------------------------------|
| PVVCY_1404360 | 6.866 | 6.362 | 5.661 | 6.264 | 0.501 | U3 small nucleolar RNA-interacting protein 2, putative       |
| PVVCY_0700190 | 3.106 | 2.849 | 2.407 | 3.181 | 0.506 | conserved Plasmodium protein, unknown function               |
| PVVCY_1301280 | 6.800 | 6.078 | 5.015 | 6.195 | 0.507 | conserved Plasmodium protein, unknown function               |
| PVVCY_1402350 | 5.223 | 4.936 | 4.488 | 5.091 | 0.508 | secreted ookinete protein, putative                          |
| PVVCY_1201690 | 5.483 | 5.017 | 4.399 | 4.773 | 0.509 | regulator of initiation factor 2, putative                   |
| PVVCY_0903360 | 7.363 | 7.096 | 6.548 | 6.382 | 0.518 | PQ-loop repeat-containing protein                            |
| PVVCY_0900630 | 2.481 | 2.123 | 1.348 | 3.232 | 0.519 | conserved Plasmodium protein, unknown function               |
| PVVCY_0301160 | 3.804 | 3.444 | 2.954 | 3.278 | 0.526 | conserved Plasmodium protein, unknown function               |
| PVVCY_1001160 | 7.348 | 6.675 | 5.718 | 6.532 | 0.529 | ribosomal RNA methyltransferase, putative                    |
| PVVCY_0501170 | 7.054 | 6.520 | 5.622 | 6.937 | 0.541 | U3 small nucleolar ribonucleoprotein protein MPP10, putative |
| PVVCY_1401600 | 7.260 | 6.868 | 6.356 | 6.571 | 0.544 | exportin-T, putative                                         |
| PVVCY_0902750 | 7.552 | 7.038 | 6.112 | 7.662 | 0.545 | fam-d protein                                                |
| PVVCY_1301720 | 7.179 | 6.732 | 6.184 | 6.245 | 0.547 | ribosome biogenesis protein TSR1, putative                   |
| PVVCY_1203620 | 9.032 | 8.094 | 6.538 | 8.677 | 0.549 | bis(5'-nucleosyl)-tetraphosphatase [asymmetrical], putative  |
| PVVCY_0300860 | 6.471 | 6.114 | 5.391 | 6.861 | 0.550 | syntaxin, putative                                           |
| PVVCY_1204050 | 7.728 | 7.333 | 6.723 | 7.363 | 0.563 | zinc finger protein, putative                                |
| PVVCY_0600070 | 7.170 | 6.819 | 6.369 | 6.485 | 0.566 | XPA binding protein 1, putative                              |
| PVVCY_1400150 | 3.102 | 2.560 | 1.843 | 2.141 | 0.567 | orotate phosphoribosyltransferase, putative                  |
| PVVCY_0500540 | 6.327 | 5.714 | 4.770 | 5.729 | 0.570 | histone acetyltransferase, putative                          |
| PVVCY_1000540 | 9.555 | 9.057 | 8.436 | 8.499 | 0.581 | conserved Plasmodium protein, unknown function               |
| PVVCY_0902940 | 5.269 | 4.695 | 4.002 | 3.968 | 0.588 | methyltransferase, putative                                  |
| PVVCY_1004180 | 7.006 | 6.470 | 5.603 | 6.554 | 0.591 | ribosome biogenesis protein BOP1, putative                   |
| PVVCY_1402460 | 2.381 | 2.192 | 1.703 | 2.854 | 0.595 | conserved Plasmodium protein, unknown function               |
| PVVCY_0701180 | 7.322 | 6.905 | 6.234 | 6.942 | 0.599 | U3 small nucleolar ribonucleoprotein protein IMP4, putative  |
| PVVCY_0100610 | 7.310 | 6.859 | 6.049 | 7.183 | 0.601 | conserved Plasmodium protein, unknown function               |
| PVVCY_0800520 | 6.242 | 6.313 | 5.419 | 5.817 | 0.602 | transcription factor, putative                               |
| PVVCY_0902190 | 9.858 | 9.427 | 8.795 | 9.226 | 0.613 | splicing factor, putative                                    |

|               |        |        |        |        |       |                                                          |
|---------------|--------|--------|--------|--------|-------|----------------------------------------------------------|
| PVVCY_0200970 | 6.380  | 6.142  | 5.657  | 6.468  | 0.616 | nucleoside transporter 4, putative                       |
| PVVCY_1003870 | 3.698  | 3.793  | 3.743  | 4.453  | 0.617 | conserved Plasmodium protein, unknown function           |
| PVVCY_0801720 | 7.565  | 7.168  | 6.571  | 7.013  | 0.623 | gamma-glutamylcysteine synthetase, putative              |
| PVVCY_1101530 | 6.914  | 6.160  | 5.012  | 5.899  | 0.627 | kinase, putative                                         |
| PVVCY_1302520 | 8.270  | 7.811  | 7.172  | 7.454  | 0.630 | FYVE and coiled-coil domain-containing protein, putative |
| PVVCY_0200640 | 6.863  | 6.267  | 5.361  | 6.039  | 0.633 | asparagine and aspartate rich protein 2, putative        |
| PVVCY_0201300 | 6.615  | 6.284  | 5.343  | 5.215  | 0.640 | 1-cys peroxiredoxin, putative                            |
| PVVCY_1304100 | 9.997  | 9.792  | 9.088  | 9.047  | 0.640 | V-type proton ATPase subunit G, putative                 |
| PVVCY_1003500 | 2.256  | 1.962  | 1.349  | 2.333  | 0.646 | conserved Plasmodium protein, unknown function           |
| PVVCY_1403460 | 7.097  | 6.919  | 6.626  | 6.902  | 0.651 | DNA-binding chaperone, putative                          |
| PVVCY_1003910 | 1.663  | 1.333  | 0.635  | 1.753  | 0.652 | conserved Plasmodium protein, unknown function           |
| PVVCY_1405440 | 6.876  | 6.354  | 5.440  | 6.459  | 0.655 | periodic tryptophan protein 1, putative                  |
| PVVCY_0700560 | 4.889  | 4.531  | 4.002  | 4.316  | 0.656 | conserved Plasmodium protein, unknown function           |
| PVVCY_0500640 | 6.493  | 6.223  | 5.534  | 6.890  | 0.662 | conserved Plasmodium protein, unknown function           |
| PVVCY_1305290 | 2.830  | 2.571  | 1.943  | 3.090  | 0.671 | conserved Plasmodium protein, unknown function           |
| PVVCY_0903510 | 7.274  | 6.742  | 5.920  | 6.493  | 0.672 | conserved Plasmodium protein, unknown function           |
| PVVCY_1004050 | 9.593  | 9.056  | 8.183  | 8.916  | 0.674 | rRNA 2'-O-methyltransferase fibrillarin, putative        |
| PVVCY_0200490 | 7.200  | 6.788  | 6.020  | 6.948  | 0.674 | mitochondrial carrier protein, putative                  |
| PVVCY_1401640 | 5.844  | 5.587  | 5.028  | 5.904  | 0.676 | conserved Plasmodium protein, unknown function           |
| PVVCY_1104100 | 10.435 | 10.108 | 9.461  | 10.336 | 0.677 | conserved Plasmodium protein, unknown function           |
| PVVCY_1203680 | 6.136  | 6.065  | 4.812  | 5.121  | 0.681 | conserved Plasmodium protein, unknown function           |
| PVVCY_1405350 | 5.887  | 5.754  | 5.496  | 5.404  | 0.688 | S-adenosyl-methyltransferase, putative                   |
| PVVCY_0902290 | 11.273 | 11.339 | 10.808 | 11.065 | 0.698 | 60S ribosomal protein L35, putative                      |
| PVVCY_1104230 | 5.908  | 5.064  | 3.499  | 5.306  | 0.733 | ubiquitin-activating enzyme, putative                    |
| PVVCY_1200510 | 12.185 | 11.848 | 11.486 | 11.240 | 0.739 | DNA RNA-binding protein Alba 3, putative                 |
| PVVCY_1301740 | 2.781  | 2.873  | 2.142  | 2.489  | 0.742 | leucine-rich repeat protein                              |
| PVVCY_0702050 | 7.524  | 7.253  | 6.710  | 7.416  | 0.743 | RNA-binding protein NOB1, putative                       |



|               |        |        |        |        |       |                                                          |
|---------------|--------|--------|--------|--------|-------|----------------------------------------------------------|
| PVVCY_1104430 | 5.795  | 5.294  | 4.380  | 5.359  | 0.747 | conserved Plasmodium protein, unknown function           |
| PVVCY_0802790 | 2.847  | 2.499  | 1.571  | 3.267  | 0.755 | conserved protein, unknown function                      |
| PVVCY_1303270 | 5.181  | 4.763  | 4.080  | 4.584  | 0.764 | conserved Plasmodium protein, unknown function           |
| PVVCY_1406540 | 4.589  | 4.160  | 3.284  | 4.382  | 0.774 | conserved Plasmodium protein, unknown function           |
| PVVCY_0700320 | 5.482  | 5.351  | 4.972  | 5.685  | 0.775 | conserved Plasmodium protein, unknown function           |
| PVVCY_1202810 | 7.331  | 6.971  | 6.243  | 7.130  | 0.779 | U3 small nucleolar RNA-associated protein 14, putative   |
| PVVCY_0400170 | 7.218  | 6.914  | 6.385  | 6.836  | 0.781 | serine threonine protein kinase, putative                |
| PVVCY_1203070 | 6.373  | 6.455  | 5.508  | 5.901  | 0.785 | conserved Plasmodium protein, unknown function           |
| PVVCY_1404460 | 7.285  | 6.750  | 5.905  | 6.403  | 0.785 | histone acetyltransferase, putative                      |
| PVVCY_1405470 | 10.280 | 9.793  | 9.128  | 9.233  | 0.785 | conserved Plasmodium protein, unknown function           |
| PVVCY_0401590 | 8.800  | 7.916  | 6.403  | 7.612  | 0.787 | arginase, putative                                       |
| PVVCY_1003980 | 13.697 | 13.187 | 12.515 | 12.539 | 0.789 | plasmepsin IV, putative                                  |
| PVVCY_0902210 | 6.678  | 6.195  | 5.579  | 5.537  | 0.794 | beige_BEACH domain protein, putative                     |
| PVVCY_1406310 | 6.747  | 6.221  | 5.342  | 5.972  | 0.795 | methyltransferase, putative                              |
| PVVCY_1301510 | 7.941  | 7.883  | 7.297  | 7.397  | 0.797 | conserved Plasmodium protein, unknown function           |
| PVVCY_0400110 | 3.157  | 2.915  | 2.190  | 3.514  | 0.802 | fam-a protein                                            |
| PVVCY_1400730 | 5.814  | 5.269  | 4.208  | 5.313  | 0.808 | U3 small nucleolar RNA-associated protein 6, putative    |
| PVVCY_0801950 | 5.795  | 5.230  | 4.344  | 4.804  | 0.811 | conserved Plasmodium protein, unknown function           |
| PVVCY_1401930 | 8.461  | 7.799  | 6.789  | 7.233  | 0.812 | N2,N2-dimethylguanosine tRNA methyltransferase, putative |
| PVVCY_1001870 | 2.240  | 2.123  | 1.657  | 2.640  | 0.816 | conserved Plasmodium protein, unknown function           |
| PVVCY_1405860 | 4.650  | 4.860  | 4.800  | 5.867  | 0.817 | zinc finger protein, putative                            |
| PVVCY_0700500 | 6.976  | 6.538  | 5.592  | 6.740  | 0.823 | protein KRI1, putative                                   |
| PVVCY_1004190 | 7.010  | 6.593  | 5.970  | 6.191  | 0.828 | RING zinc finger protein, putative                       |
| PVVCY_0301700 | 10.764 | 10.436 | 9.824  | 10.374 | 0.831 | Plasmodium exported protein, unknown function            |
| PVVCY_1401800 | 5.853  | 5.416  | 4.685  | 5.150  | 0.834 | conserved Plasmodium protein, unknown function           |
| PVVCY_0901730 | 5.433  | 4.991  | 4.039  | 5.155  | 0.836 | tRNA m(1)G methyltransferase, putative                   |
| PVVCY_1102940 | 8.717  | 8.421  | 7.344  | 7.276  | 0.836 | amino acid transporter, putative                         |

|               |        |        |        |        |       |                                                                |
|---------------|--------|--------|--------|--------|-------|----------------------------------------------------------------|
| PVVCY_1204100 | 4.992  | 4.356  | 3.395  | 3.729  | 0.848 | WD repeat-containing protein, putative                         |
| PVVCY_1306790 | 7.133  | 6.680  | 5.843  | 6.542  | 0.849 | U3 small nucleolar RNA-associated protein 15, putative         |
| PVVCY_0904160 | 7.037  | 6.673  | 5.954  | 6.653  | 0.850 | DNA-directed RNA polymerases I and III subunit RPAC1, putative |
| PVVCY_1104400 | 7.546  | 7.492  | 7.061  | 7.116  | 0.851 | U1 small nuclear ribonucleoprotein, putative                   |
| PVVCY_0903770 | 6.784  | 6.749  | 5.358  | 5.715  | 0.852 | conserved Plasmodium protein, unknown function                 |
| PVVCY_0701920 | 4.310  | 4.011  | 3.188  | 4.443  | 0.854 | conserved Plasmodium protein, unknown function                 |
| PVVCY_1404270 | 6.474  | 6.025  | 5.471  | 5.333  | 0.860 | VAC14 domain-containing protein, putative                      |
| PVVCY_1306480 | 4.918  | 5.131  | 3.557  | 4.281  | 0.862 | conserved Plasmodium protein, unknown function                 |
| PVVCY_0902280 | 7.550  | 7.253  | 6.599  | 7.335  | 0.868 | nuclear preribosomal assembly protein, putative                |
| PVVCY_1303680 | 11.497 | 11.345 | 11.083 | 11.249 | 0.874 | exported protein 2, putative                                   |
| PVVCY_0401810 | 8.937  | 8.718  | 8.375  | 8.509  | 0.881 | signal peptidase complex subunit 3, putative                   |
| PVVCY_0100350 | 8.534  | 7.878  | 6.707  | 7.491  | 0.890 | dihydroorotate dehydrogenase, putative                         |
| PVVCY_0600270 | 6.531  | 5.955  | 4.821  | 5.805  | 0.891 | threonylcarbamoyl-AMP synthase, putative                       |
| PVVCY_0502300 | 5.829  | 5.235  | 3.817  | 5.525  | 0.892 | conserved Plasmodium protein, unknown function                 |
| PVVCY_1202220 | 5.062  | 4.868  | 4.215  | 5.295  | 0.893 | conserved Plasmodium protein, unknown function                 |
| PVVCY_1401410 | 9.805  | 9.166  | 8.381  | 8.150  | 0.894 | V-type proton ATPase catalytic subunit A, putative             |
| PVVCY_0902500 | 9.972  | 9.398  | 8.211  | 9.337  | 0.896 | protein phosphatase, putative                                  |
| PVVCY_0401340 | 8.470  | 8.160  | 7.567  | 8.035  | 0.901 | conserved Plasmodium protein, unknown function                 |
| PVVCY_0301620 | 5.652  | 5.277  | 4.439  | 5.316  | 0.911 | conserved Plasmodium protein, unknown function                 |
| PVVCY_0801140 | 8.448  | 8.317  | 7.976  | 8.412  | 0.914 | conserved protein, unknown function                            |
| PVVCY_1404240 | 5.302  | 5.052  | 4.055  | 5.811  | 0.917 | conserved Plasmodium protein, unknown function                 |
| PVVCY_1306710 | 8.226  | 7.884  | 7.137  | 7.882  | 0.918 | conserved Plasmodium protein, unknown function                 |
| PVVCY_0700750 | 5.585  | 5.246  | 4.849  | 4.663  | 0.924 | serine_threonine protein kinase VPS15, putative                |
| PVVCY_1304170 | 4.926  | 5.239  | 3.743  | 4.550  | 0.930 | protein BCP1, putative                                         |
| PVVCY_1002000 | 5.886  | 5.289  | 4.152  | 4.970  | 0.931 | diphthamide biosynthesis protein 2, putative                   |
| PVVCY_0100490 | 4.126  | 3.972  | 2.968  | 3.046  | 0.931 | RAP protein, putative                                          |
| PVVCY_0904100 | 6.499  | 6.397  | 5.329  | 5.491  | 0.932 | methyltransferase, putative                                    |

|               |        |        |        |        |       |                                                              |
|---------------|--------|--------|--------|--------|-------|--------------------------------------------------------------|
| PVVCY_0903430 | 6.700  | 6.686  | 5.633  | 5.902  | 0.937 | conserved Plasmodium protein, unknown function               |
| PVVCY_1405650 | 7.208  | 6.801  | 6.238  | 5.874  | 0.937 | vacuolar protein sorting-associated protein 16, putative     |
| PVVCY_0300720 | 8.109  | 7.716  | 6.969  | 6.672  | 0.943 | phospholipase A2, putative                                   |
| PVVCY_1100970 | 1.543  | 1.930  | 2.271  | 2.670  | 0.959 | leucine-rich repeat protein                                  |
| PVVCY_1302640 | 7.395  | 7.140  | 6.599  | 7.089  | 0.981 | U3 small nucleolar ribonucleoprotein protein IMP3, putative  |
| PVVCY_0101230 | 6.252  | 5.780  | 4.860  | 5.543  | 0.988 | cytoplasmic tRNA 2-thiolation protein 1, putative            |
| PVVCY_0800480 | 1.381  | 1.247  | 0.942  | 1.244  | 0.991 | conserved Plasmodium protein, unknown function               |
| PVVCY_1203170 | 8.449  | 7.679  | 6.020  | 7.532  | 0.991 | pyridoxal kinase, putative                                   |
| PVVCY_1301970 | 7.802  | 7.543  | 7.113  | 7.294  | 0.994 | iron sulfur cluster assembly protein, putative               |
| PVVCY_0803450 | 8.868  | 8.469  | 7.484  | 8.579  | 0.995 | lysophospholipase, putative                                  |
| PVVCY_0301670 | 11.278 | 11.330 | 11.158 | 11.777 | 1.002 | ribosome associated membrane protein RAMP4, putative         |
| PVVCY_0700890 | 11.648 | 11.574 | 11.135 | 11.157 | 1.003 | 60S ribosomal protein L22, putative                          |
| PVVCY_1304640 | 5.951  | 5.664  | 5.185  | 5.382  | 1.005 | transcriptional regulatory protein sir2 homologue, putative  |
| PVVCY_0300630 | 6.968  | 6.612  | 5.906  | 6.424  | 1.008 | KRR1 small subunit processome component, putative            |
| PVVCY_1303260 | 6.628  | 6.285  | 5.285  | 6.566  | 1.017 | 60S ribosome subunit biogenesis protein NIP7, putative       |
| PVVCY_0700610 | 6.093  | 5.635  | 4.687  | 5.429  | 1.022 | nucleoside transporter 2, putative                           |
| PVVCY_0500470 | 6.718  | 6.295  | 5.283  | 6.289  | 1.029 | RNA-binding protein 34, putative                             |
| PVVCY_1401420 | 11.945 | 11.400 | 10.466 | 10.848 | 1.041 | M1-family alanyl aminopeptidase, putative                    |
| PVVCY_1304760 | 3.597  | 3.599  | 2.260  | 2.600  | 1.050 | conserved Plasmodium protein, unknown function               |
| PVVCY_1404040 | 10.077 | 9.672  | 8.852  | 9.420  | 1.054 | phospholipid-transporting ATPase, putative                   |
| PVVCY_1100310 | 12.518 | 11.800 | 10.425 | 11.245 | 1.054 | merozoite surface protein 8, putative                        |
| PVVCY_0600650 | 6.341  | 5.828  | 4.985  | 5.245  | 1.057 | tRNA delta(2)-isopentenylpyrophosphate transferase, putative |
| PVVCY_0700260 | 5.441  | 5.110  | 4.218  | 5.198  | 1.057 | rhomboid protease ROM3, putative                             |
| PVVCY_1305900 | 10.069 | 9.245  | 7.940  | 8.235  | 1.062 | phosphoenolpyruvate carboxykinase, putative                  |
| PVVCY_0900900 | 5.987  | 5.823  | 5.280  | 5.984  | 1.073 | conserved Plasmodium protein, unknown function               |
| PVVCY_1304030 | 1.926  | 1.736  | 1.139  | 1.868  | 1.082 | conserved Plasmodium protein, unknown function               |
| PVVCY_1004170 | 6.783  | 6.350  | 5.198  | 6.383  | 1.085 | RNA-binding protein, putative                                |

|               |        |        |        |        |       |                                                         |
|---------------|--------|--------|--------|--------|-------|---------------------------------------------------------|
| PVVCY_1001510 | 4.384  | 4.030  | 3.068  | 4.060  | 1.097 | conserved Plasmodium protein, unknown function          |
| PVVCY_1303000 | 5.790  | 5.454  | 4.515  | 5.507  | 1.102 | zinc finger protein, putative                           |
| PVVCY_0400910 | 6.298  | 5.964  | 5.085  | 5.935  | 1.110 | phd finger protein, putative                            |
| PVVCY_1302290 | 7.153  | 6.743  | 5.886  | 6.446  | 1.111 | large ribosomal subunit nuclear export factor, putative |
| PVVCY_0401030 | 12.797 | 12.148 | 10.829 | 11.632 | 1.112 | conserved Plasmodium protein, unknown function          |
| PVVCY_0900340 | 8.647  | 8.201  | 7.474  | 7.630  | 1.116 | syntaxin, putative                                      |
| PVVCY_1302320 | 11.756 | 11.139 | 10.022 | 10.451 | 1.139 | chabaupain 1                                            |
| PVVCY_0301640 | 5.698  | 5.437  | 4.738  | 5.391  | 1.139 | conserved Plasmodium protein, unknown function          |
| PVVCY_1305020 | 6.587  | 6.121  | 5.167  | 5.702  | 1.197 | ATP-dependent RNA helicase DBP8, putative               |
| PVVCY_1303500 | 8.397  | 8.047  | 7.370  | 7.688  | 1.200 | pre-rRNA-processing protein PNO1, putative              |
| PVVCY_0501770 | 10.486 | 9.832  | 8.624  | 9.063  | 1.230 | haloacid dehalogenase-like hydrolase, putative          |
| PVVCY_1406290 | 5.518  | 5.263  | 4.364  | 5.368  | 1.236 | nucleolar rRNA processing protein, putative             |
| PVVCY_1003770 | 8.198  | 7.663  | 6.641  | 7.036  | 1.253 | cytidine triphosphate synthetase, putative              |
| PVVCY_0401560 | 10.372 | 9.937  | 9.266  | 9.281  | 1.258 | HVA22_TB2_DP1 family protein, putative                  |
| PVVCY_0902030 | 6.379  | 6.321  | 5.084  | 5.281  | 1.262 | conserved Plasmodium protein, unknown function          |
| PVVCY_0400040 | 2.794  | 2.030  | 0.000  | 1.609  | 1.270 | early transcribed membrane protein                      |
| PVVCY_1201840 | 6.777  | 6.557  | 5.054  | 5.110  | 1.273 | conserved Plasmodium protein, unknown function          |
| PVVCY_1200190 | 8.866  | 8.762  | 8.328  | 8.840  | 1.275 | conserved Plasmodium protein, unknown function          |
| PVVCY_1304570 | 0.988  | 2.216  | 1.393  | 3.061  | 1.278 | conserved Plasmodium protein, unknown function          |
| PVVCY_1104290 | 7.699  | 7.752  | 6.696  | 6.987  | 1.279 | conserved Plasmodium protein, unknown function          |
| PVVCY_1204550 | 8.797  | 8.595  | 7.914  | 8.592  | 1.285 | SNARE protein, putative                                 |
| PVVCY_0400440 | 10.298 | 9.773  | 8.712  | 9.168  | 1.287 | conserved Plasmodium membrane protein, unknown function |
| PVVCY_0800610 | 1.547  | 1.737  | 1.310  | 2.630  | 1.289 | conserved Plasmodium protein, unknown function          |
| PVVCY_0902560 | 9.919  | 9.451  | 8.712  | 8.739  | 1.290 | CRAL_TRIO domain-containing protein, putative           |
| PVVCY_0902670 | 5.267  | 5.088  | 4.056  | 4.058  | 1.292 | conserved Plasmodium protein, unknown function          |
| PVVCY_0301550 | 5.927  | 5.928  | 4.735  | 4.988  | 1.301 | conserved Plasmodium protein, unknown function          |
| PVVCY_0901490 | 12.395 | 12.087 | 11.379 | 11.155 | 1.306 | dipeptidyl aminopeptidase 1, putative                   |

|               |        |        |       |       |       |                                                            |
|---------------|--------|--------|-------|-------|-------|------------------------------------------------------------|
| PVVCY_0802020 | 6.444  | 6.258  | 5.523 | 6.321 | 1.307 | conserved Plasmodium protein, unknown function             |
| PVVCY_0601510 | 6.428  | 6.075  | 5.394 | 5.628 | 1.310 | conserved Plasmodium protein, unknown function             |
| PVVCY_0904070 | 7.288  | 6.990  | 6.232 | 6.756 | 1.310 | coproporphyrinogen-III oxidase, putative                   |
| PVVCY_1103100 | 6.111  | 5.925  | 5.478 | 5.755 | 1.317 | conserved Plasmodium protein, unknown function             |
| PVVCY_1200940 | 6.196  | 5.795  | 4.891 | 5.377 | 1.320 | DNA2_NAM7 helicase, putative                               |
| PVVCY_1100670 | 7.214  | 6.958  | 5.821 | 7.117 | 1.322 | TATA-box binding protein, putative                         |
| PVVCY_0100910 | 8.054  | 7.688  | 7.131 | 7.100 | 1.323 | zinc transporter ZIP1, putative                            |
| PVVCY_1100460 | 7.263  | 7.339  | 7.193 | 7.660 | 1.327 | zinc finger protein, putative                              |
| PVVCY_1202940 | 9.172  | 8.658  | 7.570 | 8.054 | 1.331 | mannose-6-phosphate isomerase, putative                    |
| PVVCY_0801840 | 6.213  | 6.118  | 5.539 | 5.540 | 1.371 | chaperone protein, putative                                |
| PVVCY_1203980 | 5.462  | 5.654  | 4.261 | 4.769 | 1.373 | conserved Plasmodium protein, unknown function             |
| PVVCY_0602010 | 6.505  | 6.417  | 5.320 | 5.433 | 1.377 | zinc finger protein, putative                              |
| PVVCY_1303240 | 6.536  | 6.412  | 5.796 | 6.528 | 1.377 | conserved Plasmodium protein, unknown function             |
| PVVCY_1305670 | 6.259  | 5.911  | 4.773 | 5.792 | 1.379 | nucleolar complex protein 2, putative                      |
| PVVCY_1001000 | 7.183  | 6.953  | 6.305 | 6.795 | 1.383 | E3 ubiquitin-protein ligase, putative                      |
| PVVCY_1002680 | 6.420  | 6.161  | 5.636 | 5.830 | 1.391 | DNA-directed RNA polymerase III subunit RPC6, putative     |
| PVVCY_1104540 | 5.376  | 5.232  | 4.956 | 5.035 | 1.399 | conserved Plasmodium protein, unknown function             |
| PVVCY_1406660 | 5.471  | 5.270  | 4.062 | 5.534 | 1.416 | conserved Plasmodium protein, unknown function             |
| PVVCY_0600390 | 6.407  | 6.117  | 0.000 | 9.322 | 1.421 | conserved Plasmodium protein, unknown function             |
| PVVCY_1405390 | 5.792  | 5.278  | 4.349 | 4.515 | 1.423 | conserved Plasmodium protein, unknown function             |
| PVVCY_1003330 | 6.440  | 6.103  | 5.047 | 5.877 | 1.434 | ubiquitin carboxyl-terminal hydrolase, putative            |
| PVVCY_1103620 | 10.465 | 10.463 | 9.754 | 9.885 | 1.436 | HVA22-like protein, putative                               |
| PVVCY_0402010 | 8.864  | 8.551  | 7.803 | 8.196 | 1.436 | haloacid dehalogenase-like hydrolase, putative             |
| PVVCY_1403490 | 6.099  | 5.846  | 4.842 | 5.794 | 1.443 | multiple RNA-binding domain-containing protein 1, putative |
| PVVCY_0600570 | 8.747  | 8.638  | 7.992 | 7.984 | 1.449 | eukaryotic translation initiation factor 5, putative       |
| PVVCY_0200210 | 8.121  | 7.721  | 6.674 | 7.307 | 1.450 | UMP-CMP kinase, putative                                   |
| PVVCY_0602150 | 7.110  | 6.549  | 5.590 | 5.659 | 1.459 | metallo-hydrolase_oxidoreductase, putative                 |

|               |        |        |        |        |       |                                                         |
|---------------|--------|--------|--------|--------|-------|---------------------------------------------------------|
| PVVCY_0101220 | 5.478  | 5.295  | 4.457  | 5.304  | 1.464 | conserved Plasmodium protein, unknown function          |
| PVVCY_1301070 | 5.984  | 5.733  | 4.861  | 5.577  | 1.470 | ATP-dependent RNA helicase MAK5, putative               |
| PVVCY_1404130 | 11.840 | 11.712 | 10.727 | 10.757 | 1.473 | polyadenylate-binding protein, putative                 |
| PVVCY_1102120 | 9.794  | 9.492  | 8.130  | 8.023  | 1.476 | pyridoxine biosynthesis protein PDX1, putative          |
| PVVCY_1403550 | 7.039  | 6.826  | 6.045  | 6.711  | 1.479 | conserved Plasmodium protein, unknown function          |
| PVVCY_1003890 | 6.139  | 5.824  | 5.219  | 5.348  | 1.488 | WD repeat-containing protein, putative                  |
| PVVCY_1002430 | 11.886 | 11.600 | 11.186 | 10.922 | 1.538 | 60S ribosomal protein L7-3, putative                    |
| PVVCY_1001500 | 6.345  | 6.121  | 5.458  | 5.311  | 1.545 | zinc finger protein, putative                           |
| PVVCY_1402530 | 12.274 | 12.014 | 11.647 | 11.407 | 1.555 | 60S ribosomal protein L13-2, putative                   |
| PVVCY_0901560 | 10.348 | 10.289 | 9.727  | 9.754  | 1.560 | conserved Plasmodium protein, unknown function          |
| PVVCY_0902240 | 7.000  | 7.196  | 6.122  | 6.536  | 1.563 | U6 snRNA-associated Sm-like protein LSm1, putative      |
| PVVCY_1201990 | 6.946  | 6.862  | 6.590  | 6.537  | 1.600 | heat shock protein 90, putative                         |
| PVVCY_1003930 | 11.546 | 11.415 | 10.951 | 10.875 | 1.617 | 40S ribosomal protein S8e, putative                     |
| PVVCY_0501400 | 5.763  | 5.462  | 4.412  | 4.230  | 1.653 | conserved Plasmodium protein, unknown function          |
| PVVCY_0901180 | 6.759  | 6.928  | 6.334  | 6.625  | 1.654 | conserved Plasmodium protein, unknown function          |
| PVVCY_0400960 | 9.410  | 9.260  | 8.779  | 8.680  | 1.684 | conserved Plasmodium protein, unknown function          |
| PVVCY_1001330 | 6.617  | 6.407  | 5.669  | 5.539  | 1.697 | conserved Plasmodium protein, unknown function          |
| PVVCY_1102950 | 5.674  | 5.621  | 4.992  | 5.023  | 1.737 | conserved Plasmodium protein, unknown function          |
| PVVCY_0401910 | 7.741  | 7.423  | 6.737  | 6.472  | 1.759 | DEAD_DEAH box helicase, putative                        |
| PVVCY_1004480 | 11.316 | 11.271 | 10.800 | 10.816 | 1.771 | ubiquitin-40S ribosomal protein S27a, putative          |
| PVVCY_1201890 | 8.059  | 7.862  | 6.721  | 6.656  | 1.797 | nicotinamidase, putative                                |
| PVVCY_1001790 | 11.429 | 11.440 | 10.794 | 10.895 | 1.806 | 60S ribosomal protein L14, putative                     |
| PVVCY_0601720 | 6.063  | 6.073  | 5.480  | 5.572  | 1.820 | conserved Plasmodium protein, unknown function          |
| PVVCY_1306230 | 10.009 | 9.854  | 9.374  | 9.264  | 1.824 | DNA_RNA-binding protein Alba 2, putative                |
| PVVCY_0901380 | 11.245 | 10.952 | 10.066 | 9.854  | 1.827 | chabaupain 2                                            |
| PVVCY_0800120 | 6.077  | 6.332  | 5.252  | 5.686  | 1.838 | conserved Plasmodium protein, unknown function          |
| PVVCY_0400390 | 5.336  | 5.018  | 3.770  | 3.574  | 1.858 | conserved Plasmodium membrane protein, unknown function |

|               |        |        |        |        |       |                                                                      |
|---------------|--------|--------|--------|--------|-------|----------------------------------------------------------------------|
| PVVCY_0300320 | 7.640  | 7.631  | 6.589  | 6.706  | 1.927 | aspartate aminotransferase, putative                                 |
| PVVCY_1304290 | 8.727  | 8.564  | 7.716  | 7.634  | 1.961 | phosphoribosylpyrophosphate synthetase, putative                     |
| PVVCY_1405270 | 6.688  | 6.776  | 6.000  | 6.190  | 1.966 | vesicle transport v-SNARE protein VT11, putative                     |
| PVVCY_0601740 | 11.246 | 11.306 | 10.654 | 10.785 | 2.101 | 60S ribosomal protein L11a, putative                                 |
| PVVCY_1103540 | 9.090  | 8.710  | 7.510  | 7.207  | 2.167 | pyrroline-5-carboxylate reductase, putative                          |
| PVVCY_0800680 | 6.088  | 5.793  | 5.123  | 4.863  | 2.170 | tRNA N6-adenosine threonylcarbamoyltransferase, putative             |
| PVVCY_0301380 | 5.690  | 5.692  | 4.882  | 4.955  | 2.212 | conserved Plasmodium protein, unknown function                       |
| PVVCY_1201870 | 8.861  | 8.850  | 8.197  | 8.241  | 2.219 | signal peptidase complex subunit SPC2, putative                      |
| PVVCY_0300840 | 4.553  | 4.442  | 3.744  | 3.680  | 2.262 | conserved Plasmodium protein, unknown function                       |
| PVVCY_1404260 | 6.639  | 6.706  | 6.219  | 6.330  | 2.269 | conserved Plasmodium protein, unknown function                       |
| PVVCY_1302420 | 8.461  | 8.256  | 7.433  | 7.275  | 2.302 | ATP-dependent RNA helicase DBP5, putative                            |
| PVVCY_0100290 | 4.438  | 4.540  | 3.885  | 4.043  | 2.323 | conserved Plasmodium protein, unknown function                       |
| PVVCY_0602200 | 7.060  | 7.030  | 6.202  | 6.231  | 2.330 | type 2A phosphatase-associated protein 42, putative                  |
| PVVCY_1406400 | 2.997  | 2.990  | 1.581  | 1.671  | 2.361 | conserved Plasmodium protein, unknown function                       |
| PVVCY_0801480 | 6.207  | 6.158  | 5.287  | 5.290  | 2.407 | conserved Plasmodium protein, unknown function                       |
| PVVCY_1301960 | 11.439 | 11.187 | 10.310 | 10.099 | 2.408 | aminopeptidase P, putative                                           |
| PVVCY_1403070 | 8.974  | 8.893  | 8.253  | 8.207  | 2.416 | eukaryotic translation initiation factor 3 subunit A, putative       |
| PVVCY_1202700 | 7.606  | 7.564  | 7.109  | 7.092  | 2.441 | conserved Plasmodium protein, unknown function                       |
| PVVCY_1305810 | 9.297  | 9.016  | 8.224  | 7.972  | 2.454 | V-type proton ATPase subunit D, putative                             |
| PVVCY_1202210 | 10.293 | 10.541 | 9.837  | 10.140 | 2.469 | 60S ribosomal protein L34, putative                                  |
| PVVCY_0301480 | 4.428  | 4.155  | 2.987  | 2.751  | 2.618 | conserved Plasmodium protein, unknown function                       |
| PVVCY_1403540 | 5.108  | 5.469  | 4.874  | 5.273  | 2.630 | anaphase-promoting complex subunit 10, putative                      |
| PVVCY_0700450 | 5.558  | 5.583  | 3.657  | 3.747  | 2.688 | conserved Plasmodium protein, unknown function                       |
| PVVCY_1102030 | 2.784  | 3.109  | 2.028  | 2.394  | 2.727 | conserved Plasmodium protein, unknown function                       |
| PVVCY_1002360 | 7.632  | 7.458  | 7.020  | 6.853  | 2.736 | conserved Plasmodium protein, unknown function                       |
| PVVCY_1403150 | 8.193  | 8.170  | 7.475  | 7.465  | 2.799 | DNA-directed RNA polymerases I, II, and III subunit RPABC3, putative |
| PVVCY_1304750 | 4.560  | 4.611  | 3.841  | 3.909  | 2.803 | conserved Plasmodium protein, unknown function                       |

|               |        |        |        |        |       |                                                                |
|---------------|--------|--------|--------|--------|-------|----------------------------------------------------------------|
| PVVCY_1402020 | 5.918  | 6.210  | 4.800  | 5.121  | 2.835 | microsomal signal peptidase, putative                          |
| PVVCY_0400360 | 12.008 | 12.015 | 11.561 | 11.577 | 2.843 | 60S ribosomal protein L44, putative                            |
| PVVCY_0600780 | 6.849  | 6.936  | 6.369  | 6.460  | 2.944 | conserved Plasmodium protein, unknown function                 |
| PVVCY_1103140 | 8.099  | 7.818  | 6.963  | 6.685  | 2.966 | reactive oxygen species modulator 1, putative                  |
| PVVCY_0801800 | 6.903  | 6.720  | 5.254  | 5.070  | 3.011 | pyridoxal 5'-phosphate dependent enzyme class III, putative    |
| PVVCY_1002520 | 8.911  | 8.775  | 8.352  | 8.215  | 3.018 | peptidyl-prolyl cis-trans isomerase, putative                  |
| PVVCY_0400790 | 6.429  | 6.372  | 5.822  | 5.762  | 3.056 | dual specificity protein phosphatase, putative                 |
| PVVCY_1405950 | 7.007  | 6.565  | 5.830  | 5.385  | 3.106 | N-alpha-acetyltransferase 15, NatA auxiliary subunit, putative |
| PVVCY_1200570 | 11.330 | 11.103 | 10.314 | 10.081 | 3.108 | single-strand telomeric DNA-binding protein GBP2, putative     |
| PVVCY_0800980 | 6.647  | 7.326  | 6.621  | 7.285  | 3.109 | conserved Plasmodium protein, unknown function                 |
| PVVCY_0700100 | 11.891 | 11.980 | 11.377 | 11.457 | 3.113 | conserved Plasmodium protein, unknown function                 |
| PVVCY_0200700 | 7.983  | 7.956  | 6.881  | 6.840  | 3.129 | V-type proton ATPase subunit C, putative                       |
| PVVCY_1305080 | 6.891  | 6.590  | 5.790  | 5.482  | 3.142 | conserved Plasmodium protein, unknown function                 |
| PVVCY_1203020 | 11.699 | 11.721 | 11.179 | 11.190 | 3.199 | 60S ribosomal protein L19, putative                            |
| PVVCY_0900360 | 6.026  | 5.913  | 5.440  | 5.319  | 3.213 | conserved Plasmodium protein, unknown function                 |
| PVVCY_1400980 | 7.003  | 6.771  | 6.216  | 5.975  | 3.273 | ribosomal RNA methyltransferase, putative                      |
| PVVCY_1304660 | 8.053  | 7.887  | 6.556  | 6.357  | 3.277 | transcriptional regulatory protein sir2 homologue, putative    |
| PVVCY_1201080 | 4.934  | 5.417  | 3.841  | 4.256  | 3.317 | conserved Plasmodium protein, unknown function                 |
| PVVCY_1303630 | 6.850  | 6.757  | 5.701  | 5.566  | 3.422 | RAP protein, putative                                          |
| PVVCY_1100120 | 5.171  | 5.044  | 4.324  | 4.170  | 3.447 | PIR protein CIR protein                                        |
| PVVCY_1301560 | 5.703  | 5.732  | 5.032  | 5.024  | 3.492 | NADPH--cytochrome P450 reductase, putative                     |
| PVVCY_1004110 | 3.421  | 3.756  | 2.901  | 3.169  | 3.541 | WD repeat-containing protein 65, putative                      |
| PVVCY_0501780 | 6.160  | 6.117  | 5.765  | 5.704  | 3.558 | WD repeat-containing protein 70, putative                      |
| PVVCY_1000700 | 7.870  | 7.789  | 6.823  | 6.689  | 3.583 | conserved Plasmodium protein, unknown function                 |
| PVVCY_1101950 | 6.437  | 6.231  | 5.811  | 5.592  | 3.591 | acyl-CoA synthetase, putative                                  |
| PVVCY_0900390 | 3.433  | 3.553  | 2.977  | 3.054  | 3.593 | radial spoke head protein, putative                            |
| PVVCY_0301660 | 4.701  | 5.274  | 4.478  | 4.961  | 3.645 | conserved Plasmodium protein, unknown function                 |



|               |        |        |        |        |       |                                                                |
|---------------|--------|--------|--------|--------|-------|----------------------------------------------------------------|
| PVVCY_1200370 | 5.775  | 5.960  | 5.379  | 5.512  | 3.649 | ADP_ATP carrier protein, putative                              |
| PVVCY_0900860 | 11.950 | 11.836 | 11.398 | 11.260 | 3.722 | 60S ribosomal protein L36, putative                            |
| PVVCY_1303920 | 6.665  | 6.507  | 5.840  | 5.643  | 3.748 | conserved Plasmodium protein, unknown function                 |
| PVVCY_1203570 | 11.956 | 11.897 | 11.339 | 11.242 | 3.755 | 40S ribosomal protein S9, putative                             |
| PVVCY_1402540 | 12.684 | 12.570 | 12.108 | 11.965 | 3.806 | 40S ribosomal protein S16, putative                            |
| PVVCY_0601990 | 4.752  | 5.212  | 4.274  | 4.612  | 3.852 | PelOta protein homologue, putative                             |
| PVVCY_1201930 | 9.209  | 9.253  | 8.421  | 8.389  | 3.852 | protein phosphatase inhibitor 2, putative                      |
| PVVCY_0400620 | 11.855 | 11.872 | 11.229 | 11.187 | 3.890 | 60S ribosomal protein L7, putative                             |
| PVVCY_1405820 | 12.218 | 12.105 | 11.707 | 11.567 | 3.905 | 40S ribosomal protein S17, putative                            |
| PVVCY_1204370 | 7.800  | 7.590  | 7.242  | 7.018  | 3.931 | eukaryotic translation initiation factor 3 subunit E, putative |
| PVVCY_0904270 | 2.370  | 2.394  | 1.945  | 1.924  | 3.958 | conserved Plasmodium protein, unknown function                 |
| PVVCY_0500330 | 7.149  | 7.116  | 6.242  | 6.127  | 3.968 | conserved Plasmodium protein, unknown function                 |
| PVVCY_1301030 | 12.076 | 11.726 | 11.101 | 10.724 | 3.978 | fructose-bisphosphate aldolase, putative                       |
| PVVCY_0901800 | 6.064  | 5.870  | 5.573  | 5.367  | 4.095 | conserved Plasmodium protein, unknown function                 |
| PVVCY_0501520 | 6.577  | 6.489  | 5.462  | 5.269  | 4.098 | RNA methyltransferase, putative                                |
| PVVCY_0200720 | 4.357  | 4.279  | 3.762  | 3.632  | 4.152 | DNA binding protein, putative                                  |
| PVVCY_1200390 | 6.032  | 6.290  | 5.237  | 5.339  | 4.172 | methionine--tRNA ligase, putative                              |
| PVVCY_1102620 | 4.935  | 5.509  | 3.820  | 4.118  | 4.197 | conserved Plasmodium protein, unknown function                 |
| PVVCY_0902110 | 7.399  | 7.297  | 6.696  | 6.528  | 4.300 | calcium-dependent protein kinase 7, putative                   |
| PVVCY_1203510 | 12.972 | 12.878 | 12.217 | 12.044 | 4.361 | 40S ribosomal protein S24, putative                            |
| PVVCY_1201980 | 7.055  | 6.976  | 6.701  | 6.596  | 4.370 | heat shock protein 90, putative                                |
| PVVCY_1404160 | 6.199  | 6.108  | 5.284  | 5.084  | 4.457 | cytochrome c heme lyase, putative                              |
| PVVCY_0100950 | 2.495  | 2.583  | 1.815  | 1.777  | 4.458 | conserved Plasmodium protein, unknown function                 |
| PVVCY_1001470 | 8.774  | 8.628  | 7.225  | 6.892  | 4.460 | conserved Plasmodium protein, unknown function                 |
| PVVCY_1204300 | 9.158  | 9.109  | 8.507  | 8.374  | 4.493 | Hsc70-interacting protein, putative                            |
| PVVCY_1200300 | 11.819 | 11.860 | 11.252 | 11.194 | 4.503 | 60S ribosomal protein L13, putative                            |
| PVVCY_1203180 | 4.964  | 4.790  | 3.879  | 3.591  | 4.507 | RAP protein, putative                                          |

|               |        |        |        |        |       |                                                                      |
|---------------|--------|--------|--------|--------|-------|----------------------------------------------------------------------|
| PVVCY_1102320 | 5.617  | 5.898  | 5.132  | 5.241  | 4.608 | ferredoxin--NADP reductase, putative                                 |
| PVVCY_1103280 | 5.636  | 5.446  | 4.936  | 4.694  | 4.623 | RAP protein, putative                                                |
| PVVCY_1003100 | 1.414  | 1.729  | 0.877  | 0.998  | 4.624 | inner membrane complex protein 1I, putative                          |
| PVVCY_0101720 | 7.395  | 7.110  | 5.683  | 5.205  | 4.653 | M17 leucyl aminopeptidase, putative                                  |
| PVVCY_0600680 | 4.178  | 4.422  | 3.138  | 3.112  | 4.724 | conserved Plasmodium protein, unknown function                       |
| PVVCY_0903230 | 4.686  | 4.803  | 3.844  | 3.770  | 4.739 | conserved Plasmodium protein, unknown function                       |
| PVVCY_1101820 | 9.450  | 9.529  | 8.581  | 8.471  | 4.795 | conserved Plasmodium protein, unknown function                       |
| PVVCY_0900820 | 5.445  | 5.338  | 4.601  | 4.377  | 4.802 | conserved Plasmodium protein, unknown function                       |
| PVVCY_1304540 | 7.318  | 7.568  | 6.689  | 6.728  | 4.817 | nicotinate-nucleotide adenyllyltransferase, putative                 |
| PVVCY_0801610 | 4.939  | 5.207  | 4.384  | 4.445  | 4.841 | XPA binding protein 1, putative                                      |
| PVVCY_0502350 | 11.726 | 11.886 | 11.224 | 11.228 | 4.847 | 40S ribosomal protein S19, putative                                  |
| PVVCY_1203010 | 5.192  | 6.082  | 5.084  | 5.612  | 4.860 | pre-mRNA-splicing factor CWF7, putative                              |
| PVVCY_1102180 | 11.101 | 11.149 | 10.288 | 10.156 | 4.918 | nascent polypeptide-associated complex subunit alpha, putative       |
| PVVCY_1002340 | 10.699 | 10.876 | 9.926  | 9.876  | 4.945 | transcription factor 3b, putative                                    |
| PVVCY_1003510 | 8.113  | 7.946  | 7.675  | 7.486  | 5.033 | ubiquitin-conjugating enzyme, putative                               |
| PVVCY_1306440 | 8.206  | 8.048  | 6.969  | 6.615  | 5.052 | TBC domain protein, putative                                         |
| PVVCY_0802880 | 6.625  | 6.531  | 5.833  | 5.609  | 5.077 | zinc finger protein, putative                                        |
| PVVCY_0900250 | 12.478 | 12.285 | 11.768 | 11.504 | 5.087 | 60S acidic ribosomal protein P1, putative                            |
| PVVCY_0803290 | 9.225  | 9.227  | 8.560  | 8.409  | 5.180 | V-type proton ATPase subunit E, putative                             |
| PVVCY_0200180 | 6.580  | 6.347  | 5.513  | 5.141  | 5.222 | eukaryotic translation initiation factor 4E, putative                |
| PVVCY_0400250 | 9.316  | 9.388  | 8.951  | 8.903  | 5.257 | DNA-directed RNA polymerases I, II, and III subunit RPABC2, putative |
| PVVCY_0200420 | 7.454  | 7.449  | 6.874  | 6.733  | 5.267 | cleavage and polyadenylation specificity factor subunit 5, putative  |
| PVVCY_0401860 | 12.054 | 11.971 | 11.441 | 11.252 | 5.283 | 60S ribosomal protein L32, putative                                  |
| PVVCY_1400680 | 8.011  | 8.004  | 7.429  | 7.286  | 5.284 | V-type proton ATPase subunit H, putative                             |
| PVVCY_1306770 | 6.044  | 6.067  | 5.670  | 5.592  | 5.285 | conserved Plasmodium protein, unknown function                       |
| PVVCY_0902430 | 12.100 | 12.221 | 11.627 | 11.577 | 5.285 | 40S ribosomal protein S18, putative                                  |
| PVVCY_1301350 | 5.802  | 6.128  | 5.026  | 5.000  | 5.342 | conserved Plasmodium protein, unknown function                       |

|               |        |        |        |        |       |                                                                                       |
|---------------|--------|--------|--------|--------|-------|---------------------------------------------------------------------------------------|
| PVVCY_1401050 | 7.081  | 7.520  | 6.129  | 6.115  | 5.348 | zinc finger protein, putative                                                         |
| PVVCY_1300910 | 6.303  | 6.108  | 4.910  | 4.467  | 5.358 | poly(A)-specific ribonuclease PARN, putative                                          |
| PVVCY_1000320 | 6.147  | 5.988  | 5.335  | 5.052  | 5.379 | methyltransferase, putative                                                           |
| PVVCY_0701760 | 12.250 | 12.148 | 11.599 | 11.382 | 5.428 | 60S ribosomal protein L15, putative                                                   |
| PVVCY_0500340 | 7.875  | 7.983  | 7.265  | 7.157  | 5.466 | conserved Plasmodium protein, unknown function                                        |
| PVVCY_0901440 | 9.337  | 9.016  | 7.581  | 6.963  | 5.504 | pyridoxine biosynthesis protein PDX2, putative                                        |
| PVVCY_1202900 | 9.126  | 9.236  | 7.682  | 7.337  | 5.563 | 1-cys peroxiredoxin, putative                                                         |
| PVVCY_1101400 | 6.456  | 6.675  | 5.104  | 4.830  | 5.576 | mitochondrial import inner membrane translocase subunit TIM16, putative               |
| PVVCY_1101830 | 12.252 | 12.428 | 11.650 | 11.562 | 5.576 | ribosomal protein L27a, putative                                                      |
| PVVCY_1401240 | 6.519  | 6.618  | 5.548  | 5.322  | 5.591 | septum formation protein MAF homologue, putative                                      |
| PVVCY_1001750 | 1.256  | 1.695  | 0.940  | 1.043  | 5.622 | conserved Plasmodium protein, unknown function                                        |
| PVVCY_1003730 | 10.226 | 10.018 | 9.421  | 9.103  | 5.630 | eukaryotic translation initiation factor 2 subunit gamma, putative                    |
| PVVCY_0500450 | 6.034  | 6.307  | 4.734  | 4.478  | 5.661 | tRNA methyltransferase, putative                                                      |
| PVVCY_1103310 | 7.649  | 7.731  | 6.864  | 6.672  | 5.680 | serine_threonine protein phosphatase 5, putative                                      |
| PVVCY_1102190 | 6.484  | 6.528  | 5.747  | 5.552  | 5.680 | signal recognition particle subunit SRP68, putative                                   |
| PVVCY_0200400 | 7.221  | 7.550  | 6.876  | 6.915  | 5.683 | N-terminal acetyltransferase, putative                                                |
| PVVCY_1303480 | 4.314  | 4.852  | 4.228  | 4.424  | 5.712 | conserved Plasmodium protein, unknown function                                        |
| PVVCY_0800730 | 7.159  | 6.829  | 6.422  | 6.070  | 5.717 | DnaJ protein, putative                                                                |
| PVVCY_1201640 | 11.714 | 11.854 | 11.140 | 11.026 | 5.739 | 40S ribosomal protein S3A, putative                                                   |
| PVVCY_1203230 | 6.012  | 6.060  | 5.448  | 5.299  | 5.740 | sporozoite surface antigen MB2, putative translation initiation factor IF-2, putative |
| PVVCY_1004000 | 1.572  | 1.480  | 1.112  | 0.937  | 5.759 | conserved Plasmodium protein, unknown function                                        |
| PVVCY_0100920 | 3.647  | 4.032  | 3.392  | 3.467  | 5.780 | citrate synthase-like protein, putative                                               |
| PVVCY_1304500 | 5.654  | 5.624  | 5.252  | 5.118  | 5.792 | ribonuclease P protein subunit RPR2, putative                                         |
| PVVCY_0800440 | 5.897  | 5.852  | 5.063  | 4.791  | 5.803 | NYN domain-containing protein, putative                                               |
| PVVCY_1200910 | 3.957  | 3.818  | 3.064  | 2.736  | 5.820 | conserved Plasmodium protein, unknown function                                        |
| PVVCY_1303930 | 3.267  | 4.516  | 2.905  | 3.267  | 5.834 | conserved Plasmodium protein, unknown function                                        |
| PVVCY_1401200 | 5.587  | 5.463  | 4.736  | 4.425  | 5.834 | conserved Plasmodium protein, unknown function                                        |

|               |        |        |        |        |       |                                                                         |
|---------------|--------|--------|--------|--------|-------|-------------------------------------------------------------------------|
| PVVCY_1103340 | 6.573  | 6.863  | 5.738  | 5.589  | 5.836 | RWD domain-containing protein, putative                                 |
| PVVCY_1103370 | 7.749  | 7.786  | 6.984  | 6.757  | 5.864 | mitochondrial import inner membrane translocase subunit TIM23, putative |
| PVVCY_1200560 | 7.552  | 7.539  | 6.734  | 6.471  | 5.876 | conserved Plasmodium protein, unknown function                          |
| PVVCY_1403780 | 6.583  | 6.732  | 6.028  | 5.908  | 5.876 | ribosome biogenesis protein TSR3, putative                              |
| PVVCY_0600900 | 6.184  | 6.474  | 5.032  | 4.771  | 5.892 | conserved Plasmodium protein, unknown function                          |
| PVVCY_0601940 | 12.546 | 12.720 | 11.892 | 11.747 | 5.896 | 40S ribosomal protein S5, putative                                      |
| PVVCY_1402570 | 8.026  | 8.373  | 7.424  | 7.358  | 5.897 | translation initiation factor SUI1, putative                            |
| PVVCY_1406490 | 5.730  | 5.929  | 5.330  | 5.273  | 5.915 | apicoplast dimethyladenosine synthase, putative                         |
| PVVCY_1401120 | 7.556  | 7.590  | 7.031  | 6.874  | 5.922 | protein ISD11, putative                                                 |
| PVVCY_1400930 | 10.726 | 10.762 | 10.249 | 10.108 | 5.925 | 60S ribosomal protein L24, putative                                     |
| PVVCY_0100680 | 7.879  | 8.285  | 7.048  | 6.917  | 5.951 | glutaredoxin-like protein                                               |
| PVVCY_0101180 | 7.573  | 7.752  | 7.045  | 6.929  | 5.997 | eukaryotic translation initiation factor 3 subunit L, putative          |
| PVVCY_0900590 | 4.936  | 4.652  | 4.102  | 3.729  | 6.009 | conserved Plasmodium protein, unknown function                          |
| PVVCY_1404470 | 5.500  | 5.513  | 5.022  | 4.866  | 6.021 | RNA pseudouridylate synthase, putative                                  |
| PVVCY_1000360 | 7.307  | 7.264  | 6.823  | 6.646  | 6.037 | E3 ubiquitin-protein ligase, putative                                   |
| PVVCY_0400590 | 12.442 | 12.489 | 11.856 | 11.673 | 6.037 | 40S ribosomal protein S23, putative                                     |
| PVVCY_0702000 | 7.639  | 7.792  | 7.070  | 6.925  | 6.044 | eukaryotic translation initiation factor 3 subunit M, putative          |
| PVVCY_1002840 | 7.093  | 7.592  | 6.466  | 6.407  | 6.071 | conserved Plasmodium protein, unknown function                          |
| PVVCY_1403620 | 8.046  | 7.930  | 7.639  | 7.463  | 6.078 | phosphate translocator, putative                                        |
| PVVCY_0200340 | 6.446  | 6.730  | 6.019  | 5.952  | 6.129 | conserved Plasmodium protein, unknown function                          |
| PVVCY_1200250 | 11.320 | 11.343 | 10.819 | 10.645 | 6.186 | 40S ribosomal protein S20e, putative                                    |
| PVVCY_1200890 | 4.917  | 4.901  | 4.005  | 3.665  | 6.234 | conserved Plasmodium protein, unknown function                          |
| PVVCY_1304120 | 11.778 | 11.911 | 11.429 | 11.333 | 6.249 | 60S ribosomal protein L23, putative                                     |
| PVVCY_1400920 | 6.572  | 6.716  | 5.528  | 5.175  | 6.265 | conserved Plasmodium protein, unknown function                          |
| PVVCY_1204510 | 3.633  | 3.611  | 2.648  | 2.275  | 6.265 | conserved Plasmodium protein, unknown function                          |
| PVVCY_1003380 | 12.199 | 12.076 | 11.567 | 11.299 | 6.284 | 60S ribosomal protein L10, putative                                     |
| PVVCY_1406020 | 5.301  | 5.417  | 4.044  | 3.598  | 6.285 | conserved Plasmodium protein, unknown function                          |

|               |        |        |        |        |       |                                                                |
|---------------|--------|--------|--------|--------|-------|----------------------------------------------------------------|
| PVVCY_0500510 | 5.426  | 5.553  | 4.828  | 4.633  | 6.295 | rRNA (cytosine-C(5))-methyltransferase, putative               |
| PVVCY_1002550 | 1.382  | 1.840  | 1.167  | 1.188  | 6.340 | 14-3-3 protein, putative                                       |
| PVVCY_0602140 | 7.404  | 7.569  | 6.438  | 6.099  | 6.356 | proteasome assembly chaperone 4, putative                      |
| PVVCY_0802770 | 6.034  | 6.231  | 5.837  | 5.804  | 6.358 | conserved Plasmodium protein, unknown function                 |
| PVVCY_1304090 | 11.634 | 11.779 | 11.108 | 10.933 | 6.369 | 60S ribosomal protein L6, putative                             |
| PVVCY_1204090 | 4.896  | 5.642  | 4.343  | 4.289  | 6.371 | G-protein coupled receptor, putative                           |
| PVVCY_1100430 | 11.776 | 11.991 | 11.356 | 11.230 | 6.427 | 60S ribosomal protein L31, putative                            |
| PVVCY_1104330 | 7.191  | 6.911  | 6.228  | 5.786  | 6.429 | rhostry protein RHOP148, putative                              |
| PVVCY_1403770 | 4.131  | 4.803  | 4.105  | 4.220  | 6.457 | debranching enzyme-associated ribonuclease, putative           |
| PVVCY_0301400 | 6.688  | 6.885  | 6.150  | 5.968  | 6.459 | vacuolar protein sorting-associated protein 45, putative       |
| PVVCY_1200690 | 8.970  | 8.905  | 8.436  | 8.205  | 6.476 | eukaryotic translation initiation factor 3 subunit D, putative |
| PVVCY_1302590 | 11.996 | 12.110 | 11.488 | 11.300 | 6.478 | 60S ribosomal protein L27, putative                            |
| PVVCY_1203410 | 2.012  | 2.751  | 1.525  | 1.457  | 6.486 | cyclin, putative                                               |
| PVVCY_1402390 | 6.514  | 6.856  | 6.301  | 6.274  | 6.489 | drug_metabolite transporter, putative                          |
| PVVCY_1304250 | 8.745  | 8.547  | 8.032  | 7.703  | 6.493 | SNARE protein, putative                                        |
| PVVCY_1400750 | 6.049  | 5.995  | 5.195  | 4.692  | 6.494 | ATP-dependent RNA helicase DBP6, putative                      |
| PVVCY_0801900 | 6.879  | 7.147  | 6.515  | 6.412  | 6.495 | conserved Plasmodium protein, unknown function                 |
| PVVCY_0502100 | 8.567  | 8.827  | 8.346  | 8.158  | 6.498 | enhancer of rudimentary homolog, putative                      |
| PVVCY_1305120 | 7.474  | 7.492  | 6.755  | 6.316  | 6.500 | conserved Plasmodium protein, unknown function                 |
| PVVCY_1204150 | 3.023  | 3.818  | 2.298  | 1.693  | 6.500 | RAP protein, putative                                          |
| PVVCY_1304650 | 5.499  | 5.984  | 5.066  | 4.701  | 6.505 | conserved Plasmodium protein, unknown function                 |
| PVVCY_1401530 | 4.881  | 4.829  | 4.148  | 3.834  | 6.507 | conserved Plasmodium protein, unknown function                 |
| PVVCY_1305000 | 7.734  | 7.970  | 7.270  | 7.118  | 6.509 | SAM-dependent RNA methyltransferase, putative                  |
| PVVCY_0802050 | 8.087  | 7.965  | 7.637  | 7.430  | 6.510 | ubiquitin-like protein, putative                               |
| PVVCY_0500280 | 3.707  | 4.703  | 3.475  | 3.119  | 6.512 | conserved Plasmodium protein, unknown function                 |
| PVVCY_0602130 | 5.899  | 6.269  | 5.823  | 5.696  | 6.513 | dynactin subunit 5, putative                                   |
| PVVCY_1404880 | 5.335  | 5.323  | 4.684  | 4.290  | 6.513 | phenylalanine--tRNA ligase, putative                           |

|                   |        |        |        |        |       |                                                                |
|-------------------|--------|--------|--------|--------|-------|----------------------------------------------------------------|
| PVVCY_1102250     | 6.141  | 6.344  | 5.813  | 5.569  | 6.516 | RNA methyltransferase, putative                                |
| PVVCY_0700160     | 5.655  | 5.357  | 4.995  | 4.657  | 6.517 | conserved Plasmodium protein, unknown function                 |
| PVVCY_1002350     | 11.985 | 11.979 | 11.466 | 11.249 | 6.517 | 60S ribosomal protein L21, putative                            |
| PVVCY_1201160     | 15.059 | 15.035 | 13.572 | 12.668 | 6.527 | hypoxanthine-guanine phosphoribosyltransferase, putative       |
| PVVCY_0903490     | 6.863  | 6.991  | 6.336  | 5.984  | 6.530 | signal recognition particle subunit SRP72, putative            |
| PVVCY_0400610     | 11.517 | 11.693 | 11.081 | 10.774 | 6.531 | 40S ribosomal protein S12, putative                            |
| PVVCY_1306570     | 3.859  | 4.430  | 3.503  | 3.447  | 6.532 | conserved Plasmodium protein, unknown function                 |
| PVVCY_0200550     | 3.935  | 5.018  | 3.853  | 3.557  | 6.532 | conserved Plasmodium membrane protein, unknown function        |
| PVVCY_1305760     | 12.393 | 12.259 | 11.753 | 11.463 | 6.534 | 60S ribosomal protein L18-2, putative                          |
| PVVCY_0903580     | 6.092  | 6.168  | 5.804  | 5.609  | 6.538 | CLPTM1 domain-containing protein, putative                     |
| PVVCY_1103630     | 12.315 | 12.367 | 11.802 | 11.472 | 6.552 | 40S ribosomal protein S15, putative                            |
| PVVCY_MIT_0100030 | 3.078  | 4.617  | 3.503  | 3.919  | 6.552 | cytochrome c oxidase subunit 3                                 |
| PVVCY_0701050     | 5.672  | 5.832  | 5.081  | 4.675  | 6.559 | conserved Plasmodium protein, unknown function                 |
| PVVCY_0802150     | 2.821  | 3.414  | 2.503  | 2.163  | 6.560 | OTU domain-containing protein, putative                        |
| PVVCY_0400940     | 7.521  | 8.119  | 7.088  | 6.994  | 6.562 | eukaryotic translation initiation factor 3 subunit K, putative |
| PVVCY_0801960     | 6.001  | 6.050  | 5.304  | 5.014  | 6.562 | conserved Plasmodium protein, unknown function                 |
| PVVCY_1102880     | 4.195  | 4.673  | 3.650  | 3.489  | 6.568 | N-acetyltransferase, putative                                  |
| PVVCY_1100260     | 6.471  | 6.703  | 5.978  | 5.614  | 6.569 | conserved protein, unknown function                            |
| PVVCY_1304960     | 0.794  | 1.627  | 1.339  | 1.693  | 6.574 | conserved Plasmodium protein, unknown function                 |
| PVVCY_0902860     | 4.345  | 4.955  | 4.391  | 4.266  | 6.576 | conserved Plasmodium protein, unknown function                 |
| PVVCY_1203920     | 3.910  | 3.995  | 2.978  | 2.373  | 6.577 | conserved Plasmodium protein, unknown function                 |
| PVVCY_1000270     | 10.815 | 10.980 | 10.283 | 9.908  | 6.578 | conserved Plasmodium protein, unknown function                 |
| PVVCY_1102170     | 5.038  | 5.064  | 3.949  | 3.487  | 6.579 | conserved Plasmodium protein, unknown function                 |
| PVVCY_1000930     | 12.378 | 12.371 | 11.803 | 11.555 | 6.584 | 40S ribosomal protein S11, putative                            |
| PVVCY_1002660     | 5.337  | 5.409  | 4.789  | 4.427  | 6.586 | conserved Plasmodium protein, unknown function                 |
| PVVCY_1101630     | 8.300  | 9.004  | 7.726  | 7.579  | 6.588 | BolA-like protein, putative                                    |
| PVVCY_0100420     | 4.593  | 4.891  | 4.283  | 4.011  | 6.590 | conserved Plasmodium protein, unknown function                 |

|               |        |        |        |        |       |                                                        |
|---------------|--------|--------|--------|--------|-------|--------------------------------------------------------|
| PVVCY_1201620 | 5.647  | 6.180  | 5.817  | 5.785  | 6.595 | conserved Plasmodium protein, unknown function         |
| PVVCY_0401490 | 1.056  | 2.327  | 1.502  | 1.449  | 6.598 | microneme associated antigen, putative                 |
| PVVCY_1405460 | 9.148  | 9.175  | 8.635  | 8.304  | 6.601 | ubiquitin-like modifier HUB1, putative                 |
| PVVCY_0501070 | 6.743  | 6.862  | 5.973  | 5.656  | 6.602 | conserved Plasmodium protein, unknown function         |
| PVVCY_1100620 | 3.872  | 3.908  | 3.474  | 3.212  | 6.606 | conserved Plasmodium protein, unknown function         |
| PVVCY_0100550 | 4.410  | 5.184  | 4.791  | 4.825  | 6.610 | calcium-binding protein, putative                      |
| PVVCY_1306720 | 12.099 | 12.039 | 11.560 | 11.319 | 6.611 | 60S ribosomal protein L17, putative                    |
| PVVCY_0100820 | 6.556  | 6.492  | 5.144  | 4.520  | 6.626 | conserved Plasmodium protein, unknown function         |
| PVVCY_1202240 | 4.646  | 4.950  | 4.346  | 4.072  | 6.630 | 50S ribosomal protein L1, mitochondrial, putative      |
| PVVCY_0201380 | 4.548  | 5.670  | 4.418  | 4.024  | 6.633 | conserved Plasmodium protein, unknown function         |
| PVVCY_1400300 | 11.908 | 11.895 | 11.405 | 11.183 | 6.640 | 40S ribosomal protein S7, putative                     |
| PVVCY_0801230 | 4.938  | 5.468  | 4.694  | 4.389  | 6.643 | arginine--tRNA ligase, putative                        |
| PVVCY_0500880 | 2.995  | 3.434  | 2.991  | 2.863  | 6.644 | conserved Plasmodium protein, unknown function         |
| PVVCY_1102100 | 5.978  | 5.754  | 4.947  | 4.464  | 6.662 | conserved Plasmodium protein, unknown function         |
| PVVCY_0501380 | 4.663  | 4.640  | 3.694  | 3.074  | 6.666 | conserved Plasmodium protein, unknown function         |
| PVVCY_0904080 | 11.564 | 11.844 | 11.315 | 11.070 | 6.672 | 60S ribosomal protein L28, putative                    |
| PVVCY_0801390 | 4.894  | 5.319  | 4.240  | 3.684  | 6.681 | conserved Plasmodium protein, unknown function         |
| PVVCY_1104360 | 4.282  | 4.869  | 4.287  | 4.108  | 6.693 | conserved Plasmodium protein, unknown function         |
| PVVCY_1202440 | 4.443  | 4.839  | 4.373  | 4.205  | 6.693 | ATP-dependent RNA helicase DHH1, putative              |
| PVVCY_1305840 | 3.179  | 3.108  | 2.393  | 1.899  | 6.696 | conserved Plasmodium protein, unknown function         |
| PVVCY_1000880 | 7.473  | 7.252  | 6.477  | 6.007  | 6.701 | stomatin-like protein                                  |
| PVVCY_1102660 | 4.761  | 5.954  | 3.859  | 3.567  | 6.704 | conserved Plasmodium protein, unknown function         |
| PVVCY_1402560 | 5.596  | 5.653  | 5.146  | 4.831  | 6.709 | ABC transporter F family member 1, putative            |
| PVVCY_1203270 | 11.661 | 11.779 | 11.286 | 11.000 | 6.712 | 60S ribosomal protein L12, putative                    |
| PVVCY_0300800 | 13.119 | 13.254 | 12.806 | 12.555 | 6.717 | 60S ribosomal protein L37ae, putative                  |
| PVVCY_0601750 | 12.066 | 12.274 | 11.661 | 11.325 | 6.722 | 40S ribosomal protein S10, putative                    |
| PVVCY_0902930 | 5.074  | 5.339  | 4.827  | 4.577  | 6.726 | conserved oligomeric Golgi complex subunit 2, putative |

|               |        |        |        |        |       |                                                            |
|---------------|--------|--------|--------|--------|-------|------------------------------------------------------------|
| PVVCY_1101390 | 5.388  | 5.350  | 4.432  | 3.992  | 6.728 | GTP-binding protein, putative                              |
| PVVCY_1101320 | 7.767  | 8.336  | 7.542  | 7.204  | 6.731 | orotate phosphoribosyltransferase, putative                |
| PVVCY_0101700 | 3.986  | 3.746  | 2.900  | 2.382  | 6.735 | PIR protein CIR protein                                    |
| PVVCY_1404830 | 6.939  | 7.341  | 6.803  | 6.578  | 6.740 | mitosis protein dim1, putative                             |
| PVVCY_1403410 | 7.037  | 7.046  | 6.369  | 5.918  | 6.749 | conserved Plasmodium protein, unknown function             |
| PVVCY_1300850 | 6.824  | 6.730  | 6.346  | 6.058  | 6.750 | protein transport protein SEC7, putative                   |
| PVVCY_1300680 | 11.380 | 11.186 | 10.787 | 10.499 | 6.753 | 60S ribosomal protein L1, putative                         |
| PVVCY_1406420 | 2.939  | 3.803  | 2.682  | 2.629  | 6.757 | conserved Plasmodium protein, unknown function             |
| PVVCY_1101730 | 5.084  | 5.417  | 4.818  | 4.720  | 6.759 | conserved Plasmodium protein, unknown function             |
| PVVCY_0802260 | 5.296  | 5.268  | 4.415  | 4.005  | 6.764 | conserved Plasmodium protein, unknown function             |
| PVVCY_1305160 | 7.661  | 7.934  | 6.955  | 6.647  | 6.764 | chaperone binding protein, putative                        |
| PVVCY_1200680 | 2.807  | 3.291  | 2.380  | 2.216  | 6.766 | conserved Plasmodium protein, unknown function             |
| PVVCY_1204470 | 6.925  | 7.215  | 6.589  | 6.454  | 6.768 | apicoplast TIC22 protein, putative                         |
| PVVCY_1100760 | 11.533 | 11.369 | 10.868 | 10.548 | 6.773 | 60S ribosomal protein L4, putative                         |
| PVVCY_0100150 | 7.456  | 7.481  | 6.562  | 6.148  | 6.774 | fam-a protein                                              |
| PVVCY_1202320 | 6.648  | 7.543  | 6.541  | 6.549  | 6.784 | coatamer subunit epsilon, putative                         |
| PVVCY_1403200 | 6.464  | 6.561  | 4.990  | 3.947  | 6.805 | histone-lysine N-methyltransferase, putative               |
| PVVCY_0300890 | 3.773  | 4.007  | 3.345  | 2.965  | 6.813 | conserved Plasmodium protein, unknown function             |
| PVVCY_1301590 | 5.779  | 6.002  | 5.613  | 5.414  | 6.827 | S-adenosylmethionine-dependent methyltransferase, putative |
| PVVCY_0400640 | 6.342  | 6.655  | 5.927  | 5.521  | 6.830 | ATP-dependent Clp protease proteolytic subunit, putative   |
| PVVCY_1305330 | 7.285  | 7.423  | 6.604  | 6.285  | 6.830 | nuclear movement protein, putative                         |
| PVVCY_1303020 | 9.396  | 9.247  | 8.957  | 8.711  | 6.832 | zinc finger protein, putative                              |
| PVVCY_0502330 | 6.345  | 6.128  | 5.524  | 5.039  | 6.835 | erythrocyte membrane-associated antigen, putative          |
| PVVCY_0702140 | 9.626  | 10.026 | 9.470  | 9.206  | 6.841 | ran-specific GTPase-activating protein 1, putative         |
| PVVCY_1400720 | 7.709  | 7.782  | 7.316  | 7.015  | 6.842 | exosome complex component RRP40, putative                  |
| PVVCY_1200470 | 3.625  | 4.503  | 2.868  | 2.002  | 6.843 | peptidase, putative                                        |
| PVVCY_1103580 | 2.851  | 4.013  | 4.117  | 4.542  | 6.847 | rhomboid protease ROM7, putative                           |



|               |        |        |        |        |       |                                                                   |
|---------------|--------|--------|--------|--------|-------|-------------------------------------------------------------------|
| PVVCY_0801160 | 9.903  | 10.087 | 9.619  | 9.488  | 6.855 | elongation factor 1-beta, putative                                |
| PVVCY_1104310 | 5.162  | 5.629  | 5.189  | 5.022  | 6.857 | conserved Plasmodium protein, unknown function                    |
| PVVCY_1003620 | 5.052  | 4.795  | 3.970  | 3.314  | 6.872 | methyltransferase, putative                                       |
| PVVCY_1404940 | 1.674  | 2.655  | 2.163  | 2.108  | 6.872 | conserved Plasmodium protein, unknown function                    |
| PVVCY_0500730 | 6.385  | 6.484  | 5.804  | 5.355  | 6.873 | kelch domain-containing protein, putative                         |
| PVVCY_0800110 | 5.014  | 5.483  | 4.953  | 4.718  | 6.875 | conserved Plasmodium protein, unknown function                    |
| PVVCY_0100240 | 7.673  | 7.615  | 7.055  | 6.643  | 6.879 | MYND finger protein, putative                                     |
| PVVCY_1302250 | 7.124  | 7.025  | 6.271  | 5.710  | 6.879 | conserved Plasmodium protein, unknown function                    |
| PVVCY_1104600 | 2.236  | 2.641  | 2.764  | 3.031  | 6.881 | conserved Plasmodium protein, unknown function                    |
| PVVCY_1306220 | 6.210  | 7.009  | 5.686  | 4.987  | 6.883 | nuclear import protein MOG1, putative                             |
| PVVCY_1401780 | 5.635  | 5.559  | 4.966  | 4.525  | 6.888 | conserved Plasmodium protein, unknown function                    |
| PVVCY_0803180 | 4.662  | 5.396  | 3.780  | 3.359  | 6.896 | conserved Plasmodium protein, unknown function                    |
| PVVCY_0301590 | 5.981  | 5.800  | 5.044  | 4.454  | 6.903 | apicoplast RNA methyltransferase precursor, putative              |
| PVVCY_0903020 | 3.963  | 4.022  | 2.891  | 2.103  | 6.903 | conserved Plasmodium protein, unknown function                    |
| PVVCY_0500580 | 5.490  | 5.586  | 5.112  | 4.802  | 6.904 | conserved Plasmodium protein, unknown function                    |
| PVVCY_1000400 | 5.467  | 5.620  | 5.153  | 4.865  | 6.905 | mRNA cap guanine-N7 methyltransferase, putative                   |
| PVVCY_1104180 | 2.341  | 3.008  | 2.191  | 2.123  | 6.913 | ferrochelatase, putative                                          |
| PVVCY_1403890 | 5.724  | 5.932  | 4.943  | 4.295  | 6.914 | FbpA domain protein, putative                                     |
| PVVCY_0904230 | 12.233 | 12.571 | 11.994 | 11.677 | 6.916 | 40S ribosomal protein S21, putative                               |
| PVVCY_1004390 | 2.789  | 3.723  | 3.477  | 3.565  | 6.918 | dynein light chain, putative                                      |
| PVVCY_0701690 | 4.333  | 4.559  | 3.760  | 3.250  | 6.925 | conserved protein, unknown function                               |
| PVVCY_0902270 | 7.205  | 7.315  | 6.458  | 6.080  | 6.957 | GrpE protein homolog, mitochondrial, putative                     |
| PVVCY_0800430 | 8.123  | 7.922  | 6.924  | 6.143  | 6.964 | cytosolic glyoxalase II, putative                                 |
| PVVCY_1202360 | 3.402  | 3.238  | 2.688  | 2.329  | 6.968 | conserved Plasmodium protein, unknown function                    |
| PVVCY_1200980 | 9.200  | 9.291  | 8.637  | 8.349  | 6.970 | eukaryotic translation initiation factor 2 subunit beta, putative |
| PVVCY_1001600 | 4.763  | 5.178  | 3.965  | 3.193  | 6.971 | conserved Plasmodium protein, unknown function                    |
| PVVCY_1101340 | 5.788  | 6.565  | 5.354  | 4.677  | 6.977 | AKAP-like protein, putative                                       |

|               |        |        |        |        |       |                                                                |
|---------------|--------|--------|--------|--------|-------|----------------------------------------------------------------|
| PVVCY_1001020 | 5.023  | 6.314  | 4.744  | 3.942  | 6.978 | tubulin-specific chaperone, putative                           |
| PVVCY_0700640 | 5.280  | 5.370  | 4.324  | 3.582  | 6.978 | exonuclease, putative                                          |
| PVVCY_1301750 | 5.432  | 5.919  | 4.646  | 4.233  | 6.984 | aminomethyltransferase, putative                               |
| PVVCY_0601090 | 7.633  | 7.836  | 7.249  | 7.047  | 6.988 | eukaryotic initiation factor 2a, putative                      |
| PVVCY_0802430 | 4.439  | 5.469  | 4.394  | 3.876  | 6.991 | protein kinase, putative                                       |
| PVVCY_0601030 | 5.627  | 5.749  | 5.240  | 5.038  | 6.996 | lysine-specific histone demethylase 1, putative                |
| PVVCY_1102560 | 3.623  | 4.307  | 4.182  | 4.450  | 6.998 | conserved Plasmodium protein, unknown function                 |
| PVVCY_1303570 | 5.993  | 6.623  | 5.705  | 5.189  | 7.006 | autophagy-related protein 12, putative                         |
| PVVCY_0501000 | 6.520  | 6.570  | 6.238  | 6.005  | 7.007 | conserved Plasmodium protein, unknown function                 |
| PVVCY_1002970 | 7.359  | 7.614  | 7.142  | 6.859  | 7.007 | calmodulin, putative                                           |
| PVVCY_0600340 | 11.673 | 12.059 | 11.481 | 11.369 | 7.012 | eukaryotic translation initiation factor 5A, putative          |
| PVVCY_1001990 | 4.907  | 5.420  | 4.645  | 4.201  | 7.013 | conserved Plasmodium protein, unknown function                 |
| PVVCY_1001430 | 5.524  | 5.439  | 4.291  | 3.654  | 7.017 | conserved Plasmodium protein, unknown function                 |
| PVVCY_1203700 | 5.874  | 5.970  | 4.952  | 4.469  | 7.019 | ribosomal large subunit pseudouridylate synthase, putative     |
| PVVCY_0700970 | 5.793  | 6.274  | 5.535  | 5.104  | 7.031 | conserved Plasmodium protein, unknown function                 |
| PVVCY_0701720 | 5.460  | 6.122  | 5.499  | 5.490  | 7.031 | coatamer subunit zeta, putative                                |
| PVVCY_1002650 | 5.589  | 6.292  | 5.519  | 5.116  | 7.035 | copper transporter, putative                                   |
| PVVCY_0902000 | 5.307  | 5.611  | 4.268  | 3.338  | 7.036 | conserved Plasmodium protein, unknown function                 |
| PVVCY_1303640 | 6.042  | 6.008  | 5.345  | 4.839  | 7.036 | conserved Plasmodium protein, unknown function                 |
| PVVCY_1300360 | 1.139  | 1.763  | 1.285  | 1.082  | 7.038 | conserved Plasmodium protein, unknown function                 |
| PVVCY_1305750 | 12.512 | 12.458 | 11.968 | 11.586 | 7.047 | 60S ribosomal protein L18, putative                            |
| PVVCY_0802710 | 4.183  | 4.370  | 3.239  | 2.434  | 7.047 | conserved Plasmodium protein, unknown function                 |
| PVVCY_1104150 | 6.070  | 6.202  | 5.658  | 5.280  | 7.048 | exosome complex component RRP45, putative                      |
| PVVCY_0200790 | 6.009  | 6.454  | 5.316  | 4.567  | 7.052 | RAP protein, putative                                          |
| PVVCY_0801670 | 9.242  | 9.430  | 8.767  | 8.506  | 7.056 | eukaryotic translation initiation factor 3 subunit F, putative |
| PVVCY_1305340 | 6.957  | 6.837  | 6.274  | 5.818  | 7.060 | tryptophan--tRNA ligase, putative                              |
| PVVCY_1300430 | 7.453  | 7.324  | 6.804  | 6.379  | 7.062 | conserved protein, unknown function                            |

|               |        |        |        |        |       |                                                                |
|---------------|--------|--------|--------|--------|-------|----------------------------------------------------------------|
| PVVCY_0802980 | 5.411  | 6.633  | 6.022  | 5.851  | 7.071 | conserved Plasmodium protein, unknown function                 |
| PVVCY_1000240 | 3.097  | 3.520  | 2.402  | 2.005  | 7.073 | conserved Plasmodium protein, unknown function                 |
| PVVCY_1000300 | 4.526  | 4.305  | 3.870  | 3.486  | 7.076 | conserved Plasmodium protein, unknown function                 |
| PVVCY_0904090 | 12.267 | 12.221 | 11.779 | 11.431 | 7.077 | 60S ribosomal protein L35ae, putative                          |
| PVVCY_0602020 | 9.050  | 9.043  | 8.505  | 8.215  | 7.077 | Obg-like ATPase 1, putative                                    |
| PVVCY_1406010 | 8.088  | 8.218  | 7.539  | 7.237  | 7.080 | zinc finger protein, putative                                  |
| PVVCY_1405870 | 0.000  | 5.064  | 1.836  | 2.459  | 7.088 | conserved Plasmodium protein, unknown function                 |
| PVVCY_0201000 | 8.469  | 8.462  | 7.929  | 7.640  | 7.090 | aspartate--tRNA ligase, putative                               |
| PVVCY_0201280 | 8.887  | 8.888  | 8.448  | 8.112  | 7.090 | signal recognition particle subunit SRP9, putative             |
| PVVCY_0300760 | 0.751  | 1.356  | 0.836  | 0.576  | 7.096 | conserved Plasmodium protein, unknown function                 |
| PVVCY_0500410 | 11.981 | 11.967 | 11.562 | 11.248 | 7.097 | 60S ribosomal protein L30e, putative                           |
| PVVCY_0200370 | 7.502  | 7.460  | 7.059  | 6.740  | 7.106 | phenylalanine--tRNA ligase alpha subunit, putative             |
| PVVCY_1003310 | 5.675  | 5.507  | 4.358  | 3.659  | 7.116 | ATP-dependent protease, putative                               |
| PVVCY_1101680 | 4.875  | 4.789  | 4.424  | 4.187  | 7.117 | conserved Plasmodium protein, unknown function                 |
| PVVCY_1002570 | 5.923  | 6.047  | 5.487  | 5.239  | 7.123 | conserved Plasmodium protein, unknown function                 |
| PVVCY_1204160 | 5.479  | 6.066  | 4.830  | 3.998  | 7.127 | conserved Plasmodium protein, unknown function                 |
| PVVCY_1301000 | 4.756  | 4.843  | 4.129  | 3.592  | 7.132 | conserved Plasmodium protein, unknown function                 |
| PVVCY_0501500 | 6.180  | 7.452  | 6.743  | 6.467  | 7.138 | 26S proteasome regulatory subunit RPN9, putative               |
| PVVCY_0900610 | 5.589  | 6.225  | 5.227  | 4.582  | 7.144 | DNA replication ATP-dependent helicase/nuclease DNA2, putative |
| PVVCY_1202100 | 5.921  | 6.163  | 5.337  | 4.992  | 7.145 | ribonucleases P/MRP protein subunit POP1, putative             |
| PVVCY_1406080 | 6.513  | 6.597  | 6.070  | 5.676  | 7.146 | conserved Plasmodium protein, unknown function                 |
| PVVCY_1306800 | 4.264  | 4.658  | 4.110  | 3.765  | 7.149 | conserved Plasmodium protein, unknown function                 |
| PVVCY_0501360 | 3.742  | 4.017  | 2.943  | 2.157  | 7.152 | conserved Plasmodium protein, unknown function                 |
| PVVCY_0401000 | 5.444  | 5.451  | 4.899  | 4.466  | 7.154 | valine--tRNA ligase, putative                                  |
| PVVCY_0200930 | 6.879  | 6.735  | 6.056  | 5.491  | 7.157 | ATP dependent RNA helicase, putative                           |
| PVVCY_1302990 | 5.727  | 5.590  | 4.907  | 4.468  | 7.160 | conserved Plasmodium protein, unknown function                 |
| PVVCY_1303090 | 4.481  | 4.576  | 4.054  | 3.807  | 7.166 | conserved oligomeric Golgi complex subunit 6, putative         |

|               |        |        |        |        |       |                                                                          |
|---------------|--------|--------|--------|--------|-------|--------------------------------------------------------------------------|
| PVVCY_1103220 | 9.071  | 8.833  | 8.196  | 7.643  | 7.175 | adenylosuccinate synthetase, putative                                    |
| PVVCY_1305390 | 5.558  | 5.878  | 5.387  | 5.065  | 7.184 | conserved Plasmodium protein, unknown function                           |
| PVVCY_1002330 | 8.185  | 7.974  | 7.061  | 6.456  | 7.186 | protein arginine N-methyltransferase 1, putative                         |
| PVVCY_0904200 | 3.145  | 3.787  | 2.638  | 2.274  | 7.190 | conserved Plasmodium protein, unknown function                           |
| PVVCY_1304350 | 0.667  | 1.656  | 1.615  | 1.784  | 7.192 | conserved Plasmodium protein, unknown function                           |
| PVVCY_0701350 | 6.260  | 6.367  | 5.185  | 4.264  | 7.198 | GTPase, putative                                                         |
| PVVCY_0801790 | 2.429  | 3.789  | 2.548  | 1.832  | 7.200 | dolichyl-diphosphooligosaccharide--protein glycosyltransferase, putative |
| PVVCY_1102050 | 6.612  | 6.917  | 6.514  | 6.253  | 7.202 | cleavage stimulation factor subunit 1, putative                          |
| PVVCY_1001720 | 6.742  | 6.820  | 6.176  | 5.845  | 7.206 | RNA methyltransferase, putative                                          |
| PVVCY_0700740 | 7.415  | 7.493  | 6.784  | 6.232  | 7.207 | RWD domain-containing protein, putative                                  |
| PVVCY_1406230 | 7.938  | 8.363  | 7.952  | 7.707  | 7.209 | conserved Plasmodium protein, unknown function                           |
| PVVCY_1302730 | 4.496  | 4.498  | 4.117  | 3.901  | 7.212 | conserved Plasmodium protein, unknown function                           |
| PVVCY_0700240 | 6.124  | 6.034  | 5.170  | 4.641  | 7.212 | leucine--tRNA ligase, putative                                           |
| PVVCY_1101580 | 6.232  | 6.348  | 5.871  | 5.510  | 7.213 | phosphatidylinositol 3-kinase, putative                                  |
| PVVCY_1304380 | 5.557  | 6.462  | 6.090  | 5.970  | 7.213 | WD repeat-containing protein, putative                                   |
| PVVCY_0600230 | 7.172  | 7.581  | 7.075  | 6.749  | 7.214 | conserved Plasmodium protein, unknown function                           |
| PVVCY_0601470 | 5.845  | 5.830  | 4.624  | 3.932  | 7.216 | conserved Plasmodium protein, unknown function                           |
| PVVCY_0900330 | 7.143  | 7.145  | 6.633  | 6.223  | 7.216 | phenylalanine--tRNA ligase beta subunit, putative                        |
| PVVCY_1301880 | 4.803  | 4.708  | 3.736  | 3.141  | 7.226 | RAP protein, putative                                                    |
| PVVCY_0800830 | 7.081  | 7.038  | 6.722  | 6.458  | 7.231 | exosome complex component RRP4, putative                                 |
| PVVCY_0601240 | 5.376  | 5.904  | 5.510  | 5.292  | 7.235 | conserved Plasmodium protein, unknown function                           |
| PVVCY_1303470 | 6.290  | 6.750  | 6.191  | 5.825  | 7.236 | translation initiation factor IF-1, putative                             |
| PVVCY_0802120 | 3.582  | 3.603  | 3.005  | 2.525  | 7.236 | conserved Plasmodium protein, unknown function                           |
| PVVCY_1303180 | 11.737 | 11.862 | 11.228 | 10.917 | 7.237 | 40S ribosomal protein S3, putative                                       |
| PVVCY_0801370 | 5.141  | 5.082  | 4.016  | 3.378  | 7.241 | conserved Plasmodium protein, unknown function                           |
| PVVCY_1104070 | 4.848  | 6.043  | 4.563  | 4.220  | 7.242 | conserved Plasmodium protein, unknown function                           |
| PVVCY_1103660 | 6.541  | 6.397  | 5.360  | 4.489  | 7.245 | riboflavin kinase / FAD synthase family protein, putative                |

|                   |        |        |        |        |       |                                                           |
|-------------------|--------|--------|--------|--------|-------|-----------------------------------------------------------|
| PVVCY_0500690     | 7.079  | 7.289  | 6.829  | 6.653  | 7.246 | conserved Plasmodium membrane protein, unknown function   |
| PVVCY_0400860     | 6.041  | 6.380  | 5.685  | 5.429  | 7.248 | SECIS-binding protein 2, putative                         |
| PVVCY_1201470     | 6.370  | 6.589  | 5.745  | 5.098  | 7.251 | conserved Plasmodium protein, unknown function            |
| PVVCY_1004350     | 4.502  | 5.701  | 4.556  | 3.833  | 7.264 | DNA-directed RNA polymerase II subunit RPB4, putative     |
| PVVCY_MIT_0100020 | 2.680  | 3.479  | 2.878  | 2.524  | 7.272 | cytochrome c oxidase subunit I                            |
| PVVCY_1101370     | 5.910  | 6.180  | 5.601  | 5.173  | 7.273 | conserved Plasmodium protein, unknown function            |
| PVVCY_1001010     | 3.473  | 4.762  | 2.889  | 1.574  | 7.275 | conserved Plasmodium protein, unknown function            |
| PVVCY_0901780     | 6.388  | 6.205  | 5.843  | 5.556  | 7.276 | ATP-dependent zinc metalloprotease FTSH, putative         |
| PVVCY_1101870     | 7.995  | 7.852  | 7.372  | 7.032  | 7.280 | trafficking protein particle complex subunit 6A, putative |
| PVVCY_0901580     | 6.154  | 6.341  | 5.496  | 5.078  | 7.283 | tyrosine--tRNA ligase, putative                           |
| PVVCY_1001080     | 6.435  | 6.864  | 5.999  | 5.356  | 7.287 | translation initiation factor SUI1, putative              |
| PVVCY_1102370     | 6.420  | 6.280  | 5.399  | 4.645  | 7.287 | ATP-dependent RNA helicase SUV3, putative                 |
| PVVCY_0301220     | 4.943  | 5.158  | 4.779  | 4.644  | 7.292 | conserved Plasmodium protein, unknown function            |
| PVVCY_1404310     | 2.675  | 3.330  | 2.652  | 2.200  | 7.293 | haloacid dehalogenase-like hydrolase, putative            |
| PVVCY_0602310     | 7.299  | 7.689  | 6.988  | 6.735  | 7.293 | mago nashi protein homologue, putative                    |
| PVVCY_0900480     | 11.714 | 11.633 | 11.126 | 10.793 | 7.294 | 40S ribosomal protein S4, putative                        |
| PVVCY_0400680     | 6.222  | 6.198  | 5.200  | 4.601  | 7.298 | conserved Plasmodium protein, unknown function            |
| PVVCY_1200830     | 5.813  | 5.665  | 5.034  | 4.483  | 7.302 | conserved Plasmodium protein, unknown function            |
| PVVCY_0800150     | 1.201  | 1.749  | 1.390  | 1.399  | 7.308 | conserved Plasmodium protein, unknown function            |
| PVVCY_1402450     | 9.907  | 10.000 | 9.243  | 8.625  | 7.308 | superoxide dismutase [Fe], putative                       |
| PVVCY_0701140     | 2.732  | 3.259  | 2.255  | 1.872  | 7.309 | perforin-like protein 5, putative                         |
| PVVCY_1002880     | 6.664  | 7.205  | 6.238  | 5.883  | 7.312 | glutathione S-transferase, putative                       |
| PVVCY_1302910     | 6.693  | 7.437  | 6.212  | 5.783  | 7.317 | cyclin, putative                                          |
| PVVCY_0600750     | 4.111  | 4.558  | 3.583  | 2.838  | 7.319 | conserved protein, unknown function                       |
| PVVCY_1202290     | 5.327  | 5.985  | 5.531  | 5.526  | 7.320 | histone deacetylase complex subunit SAP18, putative       |
| PVVCY_1404870     | 4.136  | 4.160  | 3.479  | 3.081  | 7.321 | conserved Plasmodium protein, unknown function            |
| PVVCY_0600420     | 6.193  | 6.071  | 5.055  | 4.396  | 7.331 | O-phosphoseryl-tRNA(Sec) selenium transferase, putative   |

|               |        |        |        |        |       |                                                                    |
|---------------|--------|--------|--------|--------|-------|--------------------------------------------------------------------|
| PVVCY_1100330 | 3.516  | 4.135  | 3.225  | 2.555  | 7.331 | conserved Plasmodium protein, unknown function                     |
| PVVCY_0904130 | 4.169  | 4.790  | 3.982  | 3.397  | 7.332 | alpha_beta hydrolase, putative                                     |
| PVVCY_0902980 | 7.260  | 7.489  | 6.926  | 6.487  | 7.333 | RNA-binding protein s1, putative                                   |
| PVVCY_1202310 | 6.708  | 7.729  | 6.915  | 6.388  | 7.333 | protein MPODD, putative                                            |
| PVVCY_1304980 | 6.942  | 7.601  | 6.605  | 5.865  | 7.338 | trafficking protein particle complex subunit 2, putative           |
| PVVCY_0501240 | 11.439 | 11.360 | 10.898 | 10.494 | 7.341 | 60S ribosomal protein L3, putative                                 |
| PVVCY_1405970 | 6.233  | 6.396  | 5.725  | 5.179  | 7.346 | RNA-binding protein, putative                                      |
| PVVCY_0601480 | 9.659  | 9.455  | 9.039  | 8.655  | 7.348 | eukaryotic translation initiation factor 3 subunit I, putative     |
| PVVCY_1300560 | 10.860 | 10.767 | 9.907  | 9.163  | 7.348 | triosephosphate isomerase, putative                                |
| PVVCY_0200200 | 4.561  | 4.728  | 4.342  | 4.040  | 7.352 | conserved Plasmodium protein, unknown function                     |
| PVVCY_1002090 | 6.160  | 6.318  | 5.932  | 5.626  | 7.357 | conserved Plasmodium protein, unknown function                     |
| PVVCY_0201180 | 10.236 | 10.254 | 9.837  | 9.483  | 7.364 | eukaryotic translation initiation factor 2 subunit alpha, putative |
| PVVCY_0802760 | 8.478  | 8.513  | 8.221  | 7.977  | 7.368 | RNA-binding protein, putative                                      |
| PVVCY_0501270 | 4.825  | 4.709  | 4.278  | 3.892  | 7.374 | protoporphyrinogen oxidase, putative                               |
| PVVCY_1404200 | 4.842  | 4.734  | 3.858  | 3.089  | 7.378 | conserved Plasmodium protein, unknown function                     |
| PVVCY_1404400 | 6.449  | 6.578  | 5.434  | 4.470  | 7.378 | ATP-dependent RNA helicase, putative                               |
| PVVCY_0200530 | 5.964  | 6.407  | 5.690  | 5.130  | 7.392 | conserved Plasmodium protein, unknown function                     |
| PVVCY_0903730 | 5.481  | 6.039  | 5.822  | 5.710  | 7.392 | beta-catenin-like protein 1, putative                              |
| PVVCY_0200160 | 6.040  | 5.984  | 5.249  | 4.605  | 7.393 | TatD-like deoxyribonuclease, putative                              |
| PVVCY_1303440 | 11.117 | 10.922 | 10.518 | 10.142 | 7.399 | helicase 45, putative eukaryotic initiation factor 4a, putative    |
| PVVCY_1102890 | 9.252  | 8.950  | 7.905  | 6.957  | 7.403 | nicotinate phosphoribosyltransferase, putative                     |
| PVVCY_1305050 | 7.105  | 7.341  | 6.732  | 6.231  | 7.411 | 20 kDa chaperonin, putative                                        |
| PVVCY_1406550 | 6.392  | 6.863  | 6.328  | 5.920  | 7.417 | AP-3 complex subunit sigma, putative                               |
| PVVCY_0903110 | 6.746  | 6.923  | 6.372  | 5.910  | 7.428 | conserved Plasmodium protein, unknown function                     |
| PVVCY_1401270 | 6.510  | 6.726  | 5.952  | 5.299  | 7.429 | DEAD box helicase, putative                                        |
| PVVCY_1202030 | 7.472  | 7.375  | 6.892  | 6.455  | 7.433 | Cg3 protein, putative                                              |
| PVVCY_1401790 | 12.911 | 12.699 | 12.282 | 11.890 | 7.435 | 40S ribosomal protein S19, putative                                |

|               |        |        |        |        |       |                                                                   |
|---------------|--------|--------|--------|--------|-------|-------------------------------------------------------------------|
| PVVCY_0902490 | 9.258  | 9.825  | 9.279  | 8.865  | 7.437 | small nuclear ribonucleoprotein F, putative                       |
| PVVCY_1204110 | 4.323  | 4.503  | 3.744  | 3.096  | 7.442 | RNA methyltransferase, putative                                   |
| PVVCY_0501690 | 3.730  | 3.730  | 2.971  | 2.299  | 7.459 | conserved protein, unknown function                               |
| PVVCY_1202270 | 4.859  | 5.083  | 4.733  | 4.448  | 7.460 | conserved Plasmodium protein, unknown function                    |
| PVVCY_1200140 | 9.451  | 9.347  | 9.162  | 8.985  | 7.468 | RNA-binding protein, putative                                     |
| PVVCY_0700380 | 11.843 | 11.790 | 11.217 | 10.700 | 7.482 | receptor for activated c kinase, putative                         |
| PVVCY_1001760 | 7.746  | 7.871  | 7.631  | 7.429  | 7.482 | voltage-dependent anion-selective channel protein, putative       |
| PVVCY_0301540 | 12.864 | 12.956 | 12.473 | 12.051 | 7.485 | 40S ribosomal protein S26, putative                               |
| PVVCY_0601200 | 6.808  | 7.264  | 6.383  | 5.638  | 7.492 | histidine triad protein, putative                                 |
| PVVCY_0701850 | 7.585  | 7.932  | 7.480  | 7.108  | 7.496 | CDGSH iron-sulfur domain-containing protein, putative             |
| PVVCY_0701450 | 6.367  | 6.271  | 5.896  | 5.548  | 7.506 | phosphopantothenoylecysteine decarboxylase, putative              |
| PVVCY_0500790 | 7.046  | 7.330  | 6.472  | 5.723  | 7.509 | orotidine 5'-phosphate decarboxylase, putative                    |
| PVVCY_0501090 | 6.147  | 6.532  | 5.260  | 4.147  | 7.509 | conserved Plasmodium protein, unknown function                    |
| PVVCY_0101210 | 3.600  | 4.818  | 4.082  | 3.532  | 7.510 | conserved Plasmodium protein, unknown function                    |
| PVVCY_1202410 | 5.423  | 6.665  | 5.699  | 4.933  | 7.521 | coenzyme Q-binding protein COQ10 homolog, mitochondrial, putative |
| PVVCY_1203140 | 7.750  | 8.162  | 7.720  | 7.355  | 7.524 | RNA and export factor binding protein, putative                   |
| PVVCY_0904170 | 10.110 | 10.237 | 9.816  | 9.442  | 7.528 | translation initiation factor eIF-1A, putative                    |
| PVVCY_0601130 | 2.703  | 3.892  | 2.694  | 1.702  | 7.533 | conserved Plasmodium protein, unknown function                    |
| PVVCY_0401070 | 3.423  | 3.239  | 2.674  | 2.142  | 7.533 | conserved Plasmodium protein, unknown function                    |
| PVVCY_1402440 | 3.893  | 4.628  | 3.826  | 3.157  | 7.533 | selenoprotein, putative                                           |
| PVVCY_1102600 | 5.383  | 5.353  | 4.696  | 4.092  | 7.537 | conserved Plasmodium protein, unknown function                    |
| PVVCY_1304770 | 7.317  | 7.427  | 6.724  | 6.090  | 7.537 | thioredoxin, putative                                             |
| PVVCY_1101330 | 5.345  | 5.425  | 4.530  | 3.715  | 7.543 | conserved Plasmodium protein, unknown function                    |
| PVVCY_0601110 | 6.948  | 7.431  | 6.584  | 5.847  | 7.544 | trafficking protein particle complex subunit 5, putative          |
| PVVCY_1302340 | 7.049  | 7.812  | 6.803  | 5.937  | 7.547 | conserved Plasmodium protein, unknown function                    |
| PVVCY_1302430 | 4.842  | 5.289  | 4.131  | 3.099  | 7.555 | GTP-binding protein, putative                                     |
| PVVCY_0501040 | 7.826  | 8.519  | 7.720  | 7.035  | 7.559 | conserved Plasmodium protein, unknown function                    |

|               |        |        |        |        |       |                                                                         |
|---------------|--------|--------|--------|--------|-------|-------------------------------------------------------------------------|
| PVVCY_1302130 | 4.614  | 4.745  | 3.576  | 2.501  | 7.566 | serine hydroxymethyltransferase, putative                               |
| PVVCY_1404970 | 5.487  | 5.599  | 4.666  | 3.809  | 7.568 | nucleotidyltransferase, putative                                        |
| PVVCY_0400150 | 4.267  | 5.166  | 4.205  | 3.380  | 7.568 | conserved Plasmodium protein, unknown function                          |
| PVVCY_1201130 | 6.128  | 6.663  | 5.767  | 4.973  | 7.570 | conserved Plasmodium protein, unknown function                          |
| PVVCY_0701740 | 6.131  | 6.509  | 5.543  | 4.671  | 7.575 | GTP:AMP phosphotransferase, putative                                    |
| PVVCY_0600520 | 9.070  | 8.956  | 8.526  | 8.118  | 7.578 | eukaryotic translation initiation factor 3 subunit C, putative          |
| PVVCY_1104170 | 8.769  | 8.699  | 8.351  | 8.022  | 7.582 | DNA-directed RNA polymerases I, II, and III subunit RPABC1, putative    |
| PVVCY_1404100 | 6.339  | 6.859  | 5.929  | 5.094  | 7.585 | GTP cyclohydrolase I, putative                                          |
| PVVCY_0100880 | 11.587 | 11.192 | 10.563 | 9.948  | 7.602 | ornithine aminotransferase, putative                                    |
| PVVCY_1301930 | 7.686  | 7.707  | 7.160  | 6.644  | 7.612 | tRNA intron endonuclease, putative                                      |
| PVVCY_0701500 | 9.889  | 9.947  | 9.549  | 9.176  | 7.613 | eukaryotic translation initiation factor 3 subunit G, putative          |
| PVVCY_1200230 | 7.954  | 7.912  | 7.355  | 6.825  | 7.617 | N-terminal acetyltransferase A complex catalytic subunit ARD1, putative |
| PVVCY_0702030 | 7.785  | 8.403  | 7.797  | 7.252  | 7.622 | trafficking protein particle complex subunit 3, putative                |
| PVVCY_1403180 | 8.132  | 8.462  | 7.815  | 7.217  | 7.623 | conserved Plasmodium protein, unknown function                          |
| PVVCY_1303300 | 4.851  | 5.153  | 4.686  | 4.256  | 7.629 | WD repeat-containing protein 79, putative                               |
| PVVCY_1202560 | 4.369  | 4.752  | 4.339  | 3.962  | 7.633 | AAA family ATPase, putative                                             |
| PVVCY_1405480 | 8.643  | 8.918  | 8.217  | 7.561  | 7.634 | calcyclin binding protein, putative                                     |
| PVVCY_1100350 | 8.369  | 8.990  | 8.436  | 7.934  | 7.637 | zinc binding protein, putative                                          |
| PVVCY_1402760 | 4.562  | 5.223  | 4.707  | 4.244  | 7.637 | conserved Plasmodium protein, unknown function                          |
| PVVCY_1402100 | 9.668  | 9.979  | 9.519  | 9.092  | 7.641 | conserved protein, unknown function                                     |
| PVVCY_1100520 | 6.450  | 6.758  | 6.182  | 5.642  | 7.649 | centrosomal protein CEP120, putative                                    |
| PVVCY_1101380 | 13.959 | 14.051 | 12.927 | 11.850 | 7.652 | purine nucleoside phosphorylase, putative                               |
| PVVCY_0702020 | 7.085  | 7.821  | 7.078  | 6.391  | 7.653 | conserved Plasmodium protein, unknown function                          |
| PVVCY_1204200 | 6.724  | 7.032  | 6.832  | 6.651  | 7.656 | conserved Plasmodium protein, unknown function                          |
| PVVCY_0201240 | 5.198  | 5.860  | 5.150  | 4.489  | 7.657 | zinc finger protein, putative                                           |
| PVVCY_0500920 | 5.343  | 6.164  | 5.499  | 4.887  | 7.657 | conserved Plasmodium protein, unknown function                          |
| PVVCY_0600120 | 4.619  | 4.722  | 3.969  | 3.248  | 7.658 | ATP dependent RNA helicase, putative                                    |



|               |        |        |        |        |       |                                                                                    |
|---------------|--------|--------|--------|--------|-------|------------------------------------------------------------------------------------|
| PVVCY_1403370 | 5.715  | 6.074  | 5.448  | 4.856  | 7.659 | serine--tRNA ligase, putative                                                      |
| PVVCY_1001630 | 5.528  | 6.110  | 6.182  | 6.271  | 7.667 | conserved Plasmodium protein, unknown function                                     |
| PVVCY_1305850 | 4.578  | 5.588  | 4.721  | 3.897  | 7.687 | tetratricopeptide repeat protein, putative                                         |
| PVVCY_1102240 | 6.118  | 7.041  | 6.454  | 5.890  | 7.705 | conserved Plasmodium protein, unknown function                                     |
| PVVCY_1300280 | 5.117  | 5.315  | 4.644  | 3.981  | 7.719 | conserved Plasmodium protein, unknown function                                     |
| PVVCY_1302030 | 5.988  | 7.140  | 6.334  | 5.546  | 7.721 | protein tyrosine phosphatase, putative                                             |
| PVVCY_1402860 | 7.016  | 6.916  | 6.159  | 5.406  | 7.724 | hydroxymethyl-dihydropterin pyrophosphokinase- dihydropteroate synthase, putative  |
| PVVCY_1404960 | 4.973  | 6.325  | 5.601  | 4.892  | 7.725 | conserved Plasmodium protein, unknown function                                     |
| PVVCY_0401950 | 4.571  | 5.616  | 4.919  | 4.225  | 7.737 | conserved Plasmodium protein, unknown function                                     |
| PVVCY_1405070 | 4.187  | 5.239  | 5.060  | 4.882  | 7.741 | conserved Plasmodium protein, unknown function                                     |
| PVVCY_1102270 | 6.180  | 6.298  | 5.786  | 5.273  | 7.741 | conserved Plasmodium protein, unknown function                                     |
| PVVCY_0802660 | 5.589  | 5.815  | 5.185  | 4.553  | 7.747 | conserved Plasmodium protein, unknown function                                     |
| PVVCY_0802210 | 2.208  | 3.196  | 2.953  | 2.706  | 7.751 | conserved protein, unknown function                                                |
| PVVCY_1000420 | 4.773  | 4.995  | 4.258  | 3.516  | 7.757 | conserved Plasmodium protein, unknown function                                     |
| PVVCY_0401040 | 6.019  | 6.351  | 5.538  | 4.717  | 7.759 | dolichyl-diphosphooligosaccharide--protein glycosyltransferase subunit 1, putative |
| PVVCY_0600850 | 5.920  | 7.005  | 6.522  | 6.027  | 7.759 | ATP synthase mitochondrial F1 complex assembly factor 1, putative                  |
| PVVCY_1001710 | 5.948  | 6.990  | 6.301  | 5.596  | 7.763 | conserved Plasmodium protein, unknown function                                     |
| PVVCY_1201010 | 5.335  | 6.024  | 5.231  | 4.422  | 7.766 | conserved Plasmodium protein, unknown function                                     |
| PVVCY_1001540 | 8.923  | 8.913  | 8.361  | 7.803  | 7.767 | Hsp70_Hsp90 organizing protein, putative                                           |
| PVVCY_1002820 | 6.062  | 6.149  | 5.863  | 5.570  | 7.778 | YTH domain-containing protein, putative                                            |
| PVVCY_1200860 | 5.204  | 5.359  | 5.124  | 4.883  | 7.781 | metallopeptidase, putative                                                         |
| PVVCY_0501140 | 11.717 | 11.630 | 11.211 | 10.787 | 7.782 | 40S ribosomal protein S2, putative                                                 |
| PVVCY_0301070 | 7.566  | 7.519  | 7.215  | 6.905  | 7.786 | leucyl-phenylalanyl-tRNA--protein transferase, putative                            |
| PVVCY_1405120 | 6.488  | 6.777  | 6.083  | 5.367  | 7.790 | conserved Plasmodium protein, unknown function                                     |
| PVVCY_1201000 | 3.505  | 4.605  | 3.573  | 2.491  | 7.793 | 50S ribosomal protein L22, mitochondrial, putative                                 |
| PVVCY_1102680 | 11.956 | 11.636 | 11.132 | 10.623 | 7.800 | pyruvate kinase, putative                                                          |

|               |       |       |       |       |       |                                                              |
|---------------|-------|-------|-------|-------|-------|--------------------------------------------------------------|
| PVVCY_1302460 | 4.250 | 4.344 | 3.769 | 3.176 | 7.801 | conserved Plasmodium protein, unknown function               |
| PVVCY_1000390 | 5.970 | 6.483 | 6.052 | 5.595 | 7.803 | peptide chain release factor 2, putative                     |
| PVVCY_0401230 | 3.735 | 4.265 | 3.586 | 2.871 | 7.810 | Ras-like G protein, putative                                 |
| PVVCY_1405030 | 6.097 | 6.429 | 5.797 | 5.133 | 7.811 | asparagine_aspartate rich protein, putative                  |
| PVVCY_1202160 | 3.610 | 4.707 | 5.042 | 5.354 | 7.812 | conserved Plasmodium protein, unknown function               |
| PVVCY_1101510 | 7.162 | 7.121 | 6.401 | 5.656 | 7.821 | ribose-5-phosphate isomerase, putative                       |
| PVVCY_1302140 | 4.814 | 4.890 | 3.760 | 2.585 | 7.821 | conserved Plasmodium protein, unknown function               |
| PVVCY_0200390 | 4.844 | 4.860 | 4.028 | 3.163 | 7.827 | cold-shock protein, putative                                 |
| PVVCY_1402520 | 8.106 | 8.700 | 8.148 | 7.549 | 7.832 | conserved Plasmodium protein, unknown function               |
| PVVCY_1305090 | 6.048 | 6.607 | 5.515 | 4.352 | 7.845 | conserved Plasmodium protein, unknown function               |
| PVVCY_1405010 | 5.036 | 5.294 | 4.320 | 3.292 | 7.846 | pentatricopeptide repeat domain-containing protein, putative |
| PVVCY_0601260 | 5.812 | 6.778 | 6.361 | 5.883 | 7.849 | conserved Plasmodium protein, unknown function               |
| PVVCY_0801910 | 8.921 | 8.956 | 8.362 | 7.739 | 7.851 | inosine-5'-monophosphate dehydrogenase, putative             |
| PVVCY_0802940 | 4.149 | 4.863 | 4.230 | 3.535 | 7.852 | NifU-like protein, putative                                  |
| PVVCY_1406190 | 4.174 | 5.218 | 4.801 | 4.313 | 7.855 | conserved Plasmodium protein, unknown function               |
| PVVCY_1100340 | 4.721 | 5.658 | 4.926 | 4.112 | 7.859 | DnaJ protein, putative                                       |
| PVVCY_1103820 | 6.118 | 5.888 | 5.224 | 4.538 | 7.861 | protein arginine N-methyltransferase 5, putative             |
| PVVCY_1404080 | 6.557 | 6.665 | 5.950 | 5.192 | 7.862 | mitochondrial carrier protein, putative                      |
| PVVCY_0100710 | 5.017 | 5.413 | 5.007 | 4.559 | 7.863 | RING zinc finger protein, putative                           |
| PVVCY_1100440 | 5.203 | 5.596 | 5.192 | 4.746 | 7.865 | conserved Plasmodium protein, unknown function               |
| PVVCY_0701070 | 8.539 | 8.994 | 8.636 | 8.234 | 7.869 | U6 snRNA-associated Sm-like protein LSM3, putative           |
| PVVCY_1403020 | 3.793 | 3.803 | 3.183 | 2.529 | 7.869 | conserved Plasmodium protein, unknown function               |
| PVVCY_1101480 | 5.462 | 5.283 | 4.797 | 4.294 | 7.872 | aspartate--tRNA ligase, putative                             |
| PVVCY_0700820 | 8.628 | 9.225 | 8.828 | 8.375 | 7.874 | small nuclear ribonucleoprotein G, putative                  |
| PVVCY_0500360 | 4.129 | 4.269 | 3.687 | 3.062 | 7.877 | conserved Plasmodium protein, unknown function               |
| PVVCY_1306690 | 8.368 | 8.446 | 7.992 | 7.506 | 7.879 | conserved protein, unknown function                          |
| PVVCY_0300190 | 6.717 | 7.063 | 6.793 | 6.486 | 7.883 | conserved Plasmodium protein, unknown function               |

|               |        |        |        |        |       |                                                   |
|---------------|--------|--------|--------|--------|-------|---------------------------------------------------|
| PVVCY_1401380 | 5.082  | 5.441  | 5.188  | 4.897  | 7.884 | conserved Plasmodium protein, unknown function    |
| PVVCY_1204490 | 8.721  | 8.805  | 8.155  | 7.460  | 7.885 | cell cycle regulator protein, putative            |
| PVVCY_1302980 | 7.344  | 7.606  | 7.313  | 6.983  | 7.893 | YL1 nuclear protein, putative                     |
| PVVCY_0802750 | 4.379  | 5.273  | 4.681  | 3.991  | 7.894 | conserved Plasmodium protein, unknown function    |
| PVVCY_0900310 | 8.883  | 9.136  | 8.708  | 8.231  | 7.903 | casein kinase II beta chain, putative             |
| PVVCY_0800930 | 9.254  | 8.970  | 8.626  | 8.278  | 7.906 | glucose-6-phosphate isomerase, putative           |
| PVVCY_0700870 | 6.831  | 7.867  | 7.353  | 6.724  | 7.910 | conserved Plasmodium protein, unknown function    |
| PVVCY_0801320 | 2.540  | 3.828  | 4.404  | 4.927  | 7.912 | GIN5 complex subunit Psf3, putative               |
| PVVCY_0902330 | 6.056  | 6.325  | 5.614  | 4.830  | 7.912 | DNA-directed RNA polymerase, putative             |
| PVVCY_1102150 | 5.679  | 6.331  | 5.292  | 4.126  | 7.913 | ribonuclease P/MRP protein subunit RPP1, putative |
| PVVCY_1204230 | 5.831  | 6.233  | 5.931  | 5.575  | 7.916 | conserved Plasmodium protein, unknown function    |
| PVVCY_0502250 | 4.448  | 5.316  | 4.787  | 4.148  | 7.917 | ribosome-recycling factor, putative               |
| PVVCY_1001570 | 9.150  | 9.275  | 8.496  | 7.643  | 7.924 | CCR4-associated factor 16, putative               |
| PVVCY_1302330 | 8.289  | 9.147  | 8.416  | 7.554  | 7.926 | protein PET117, putative                          |
| PVVCY_0701680 | 7.914  | 8.274  | 7.575  | 6.787  | 7.931 | ATPase, putative                                  |
| PVVCY_0201340 | 6.814  | 7.405  | 6.986  | 6.480  | 7.934 | conserved Plasmodium protein, unknown function    |
| PVVCY_1201110 | 6.241  | 6.955  | 7.000  | 6.988  | 7.934 | heme oxygenase, putative                          |
| PVVCY_0701020 | 4.901  | 5.900  | 4.984  | 3.901  | 7.936 | conserved Plasmodium protein, unknown function    |
| PVVCY_1403100 | 6.046  | 6.614  | 5.965  | 5.205  | 7.945 | conserved Plasmodium protein, unknown function    |
| PVVCY_0401110 | 8.220  | 9.110  | 8.714  | 8.198  | 7.949 | 26S proteasome regulatory subunit RPN12, putative |
| PVVCY_1400740 | 5.623  | 6.061  | 5.780  | 5.431  | 7.950 | DnaJ protein, putative                            |
| PVVCY_1400450 | 4.262  | 5.411  | 5.115  | 4.676  | 7.958 | conserved Plasmodium protein, unknown function    |
| PVVCY_0700670 | 5.528  | 6.461  | 6.486  | 6.421  | 7.959 | DnaJ protein, putative                            |
| PVVCY_1301060 | 6.299  | 6.363  | 5.895  | 5.374  | 7.959 | histidine--tRNA ligase, putative                  |
| PVVCY_1002170 | 6.459  | 6.624  | 6.347  | 6.026  | 7.960 | exosome complex exonuclease RRP41, putative       |
| PVVCY_0501410 | 12.951 | 13.202 | 12.105 | 10.872 | 7.963 | adenosine deaminase, putative                     |
| PVVCY_0801920 | 6.078  | 6.707  | 6.179  | 5.532  | 7.967 | U4_U6 snRNA-associated-splicing factor, putative  |

|               |        |        |        |        |       |                                                                               |
|---------------|--------|--------|--------|--------|-------|-------------------------------------------------------------------------------|
| PVVCY_1300540 | 7.698  | 8.020  | 7.534  | 6.964  | 7.967 | leucine carboxyl methyltransferase, putative                                  |
| PVVCY_0500930 | 6.092  | 6.410  | 5.885  | 5.272  | 7.968 | RAP protein, putative                                                         |
| PVVCY_1302060 | 8.683  | 8.833  | 8.389  | 7.884  | 7.969 | hemolysin III, putative                                                       |
| PVVCY_0500320 | 8.713  | 8.742  | 8.268  | 7.741  | 7.973 | PHF5-like protein, putative                                                   |
| PVVCY_0700250 | 3.892  | 4.496  | 3.497  | 2.326  | 7.975 | conserved Plasmodium protein, unknown function                                |
| PVVCY_0903830 | 7.824  | 8.351  | 7.990  | 7.531  | 7.979 | conserved protein, unknown function                                           |
| PVVCY_0300430 | 7.257  | 7.657  | 7.435  | 7.145  | 7.982 | RNA-binding protein, putative                                                 |
| PVVCY_1203190 | 11.906 | 11.663 | 11.235 | 10.786 | 7.983 | 40S ribosomal protein S11, putative                                           |
| PVVCY_1103060 | 4.404  | 4.949  | 4.127  | 3.146  | 7.992 | bifunctional methylenetetrahydrofolate dehydrogenase/cyclohydrolase, putative |
| PVVCY_1101810 | 4.284  | 5.503  | 4.933  | 4.156  | 7.992 | conserved Plasmodium protein, unknown function                                |
| PVVCY_1404530 | 5.986  | 6.613  | 5.948  | 5.133  | 7.994 | RNA pseudouridylate synthase, putative                                        |
| PVVCY_1202490 | 5.128  | 5.514  | 4.967  | 4.305  | 8.007 | conserved Plasmodium protein, unknown function                                |
| PVVCY_1203830 | 8.275  | 8.126  | 7.665  | 7.165  | 8.008 | pre-mRNA-splicing factor BUD31, putative                                      |
| PVVCY_1300780 | 4.938  | 4.846  | 4.152  | 3.383  | 8.009 | GTP-binding protein, putative                                                 |
| PVVCY_1101260 | 6.988  | 6.961  | 6.447  | 5.870  | 8.019 | glutathione synthetase, putative                                              |
| PVVCY_1305300 | 6.625  | 7.307  | 6.771  | 6.076  | 8.019 | RanBPM and CLTH-like protein, putative                                        |
| PVVCY_1303810 | 2.316  | 2.849  | 2.244  | 1.492  | 8.020 | M1-family alanyl aminopeptidase, putative                                     |
| PVVCY_0500700 | 5.407  | 5.515  | 4.900  | 4.191  | 8.022 | ZIP domain-containing protein, putative                                       |
| PVVCY_1201200 | 5.750  | 6.219  | 5.139  | 3.856  | 8.022 | conserved Plasmodium protein, unknown function                                |
| PVVCY_1304060 | 4.884  | 6.808  | 6.801  | 6.537  | 8.025 | conserved Plasmodium protein, unknown function                                |
| PVVCY_1403310 | 8.651  | 8.993  | 8.055  | 6.944  | 8.029 | 10 kDa chaperonin, putative                                                   |
| PVVCY_0800990 | 7.808  | 7.961  | 7.601  | 7.171  | 8.030 | ER membrane protein complex subunit 4, putative                               |
| PVVCY_0900760 | 6.433  | 7.185  | 6.280  | 5.149  | 8.032 | D-tyrosyl-tRNA(Tyr) deacylase, putative                                       |
| PVVCY_0702090 | 3.328  | 4.025  | 3.259  | 2.288  | 8.038 | conserved Plasmodium protein, unknown function                                |
| PVVCY_1101980 | 4.476  | 4.312  | 4.144  | 3.974  | 8.048 | conserved Plasmodium protein, unknown function                                |
| PVVCY_1200550 | 6.310  | 7.127  | 6.585  | 5.840  | 8.054 | phosducin-like protein, putative                                              |
| PVVCY_1103960 | 3.642  | 4.350  | 3.788  | 3.035  | 8.056 | exonuclease, putative                                                         |

|               |        |        |        |        |       |                                                              |
|---------------|--------|--------|--------|--------|-------|--------------------------------------------------------------|
| PVVCY_0801150 | 5.500  | 5.728  | 4.960  | 4.042  | 8.057 | conserved Plasmodium protein, unknown function               |
| PVVCY_1404490 | 3.355  | 4.147  | 3.772  | 3.220  | 8.058 | leucine-rich repeat protein                                  |
| PVVCY_1303700 | 3.713  | 5.083  | 4.425  | 3.461  | 8.058 | conserved Plasmodium protein, unknown function               |
| PVVCY_0101160 | 6.461  | 7.158  | 6.782  | 6.241  | 8.063 | lsm12, putative                                              |
| PVVCY_0902410 | 8.432  | 8.327  | 7.813  | 7.235  | 8.068 | threonine--tRNA ligase, putative                             |
| PVVCY_1203870 | 3.366  | 3.657  | 2.990  | 2.173  | 8.068 | conserved Plasmodium protein, unknown function               |
| PVVCY_0300170 | 4.820  | 5.885  | 5.739  | 5.401  | 8.073 | conserved Plasmodium protein, unknown function               |
| PVVCY_0301650 | 13.684 | 13.878 | 13.360 | 12.729 | 8.073 | 40S ribosomal protein S30, putative                          |
| PVVCY_1404300 | 4.969  | 4.971  | 4.078  | 3.042  | 8.076 | conserved Plasmodium protein, unknown function               |
| PVVCY_1203210 | 5.731  | 7.260  | 6.854  | 6.130  | 8.081 | phosducin-like protein, putative                             |
| PVVCY_1402740 | 6.293  | 6.650  | 5.769  | 4.685  | 8.082 | conserved Plasmodium protein, unknown function               |
| PVVCY_1403650 | 2.059  | 2.653  | 2.398  | 2.002  | 8.088 | conserved Plasmodium protein, unknown function               |
| PVVCY_0902890 | 11.461 | 11.308 | 10.922 | 10.497 | 8.090 | 60S ribosomal protein L38, putative                          |
| PVVCY_0902320 | 6.878  | 7.093  | 6.701  | 6.206  | 8.091 | conserved Plasmodium protein, unknown function               |
| PVVCY_0100140 | 5.031  | 5.864  | 5.101  | 4.064  | 8.095 | CIR protein, fragment                                        |
| PVVCY_1202050 | 6.289  | 6.360  | 5.925  | 5.402  | 8.096 | cg1 protein, putative                                        |
| PVVCY_1201940 | 7.128  | 7.329  | 6.955  | 6.481  | 8.099 | conserved Plasmodium protein, unknown function               |
| PVVCY_0803340 | 6.976  | 7.260  | 7.021  | 6.689  | 8.102 | U2 small nuclear ribonucleoprotein B", putative              |
| PVVCY_0800940 | 4.943  | 5.859  | 5.235  | 4.340  | 8.104 | conserved Plasmodium protein, unknown function               |
| PVVCY_1302550 | 11.464 | 11.704 | 11.324 | 10.833 | 8.106 | 60S ribosomal protein L29, putative                          |
| PVVCY_0400770 | 6.244  | 7.135  | 7.462  | 7.686  | 8.112 | conserved Plasmodium protein, unknown function               |
| PVVCY_0701130 | 3.322  | 3.704  | 2.980  | 2.055  | 8.112 | conserved Plasmodium protein, unknown function               |
| PVVCY_1300840 | 3.406  | 4.210  | 3.725  | 3.004  | 8.114 | conserved Plasmodium protein, unknown function               |
| PVVCY_0900770 | 8.855  | 9.128  | 8.727  | 8.201  | 8.116 | casein kinase 2, alpha subunit, putative                     |
| PVVCY_1103120 | 5.644  | 6.162  | 5.593  | 4.821  | 8.121 | RNA polymerase II transcription factor B subunit 4, putative |
| PVVCY_0401570 | 12.740 | 12.688 | 12.251 | 11.737 | 8.140 | 40S ribosomal protein S15A, putative                         |
| PVVCY_0801030 | 5.537  | 5.685  | 4.872  | 3.868  | 8.141 | cytochrome c oxidase assembly protein COX15, putative        |

|               |        |        |        |        |       |                                                                 |
|---------------|--------|--------|--------|--------|-------|-----------------------------------------------------------------|
| PVVCY_1301410 | 4.884  | 6.075  | 5.657  | 4.912  | 8.150 | Appr-1-p processing domain protein                              |
| PVVCY_1001040 | 3.693  | 4.538  | 4.197  | 3.613  | 8.150 | conserved Plasmodium protein, unknown function                  |
| PVVCY_0904150 | 5.768  | 6.437  | 6.681  | 6.836  | 8.155 | DnaJ protein, putative                                          |
| PVVCY_0301100 | 5.064  | 6.246  | 5.704  | 4.803  | 8.157 | conserved Plasmodium protein, unknown function                  |
| PVVCY_0301370 | 3.969  | 4.550  | 3.776  | 2.719  | 8.157 | conserved Plasmodium protein, unknown function                  |
| PVVCY_1201970 | 9.621  | 10.197 | 9.857  | 9.325  | 8.158 | elongation factor 1 (EF-1), putative                            |
| PVVCY_0501720 | 5.073  | 4.774  | 4.360  | 3.921  | 8.159 | RNA polymerase II-associated protein 1, putative                |
| PVVCY_0901100 | 4.386  | 6.022  | 5.671  | 4.902  | 8.160 | conserved Plasmodium protein, unknown function                  |
| PVVCY_1002440 | 11.275 | 11.123 | 10.794 | 10.426 | 8.161 | 60S ribosomal protein L5, putative                              |
| PVVCY_0902370 | 6.931  | 7.779  | 7.979  | 8.043  | 8.161 | conserved Plasmodium protein, unknown function                  |
| PVVCY_1306370 | 2.434  | 3.235  | 3.173  | 2.929  | 8.161 | leucine-rich repeat protein                                     |
| PVVCY_1003570 | 11.280 | 11.487 | 11.048 | 10.457 | 8.162 | nuclear transport factor 2, putative                            |
| PVVCY_1401480 | 5.273  | 5.747  | 5.474  | 5.026  | 8.162 | conserved Plasmodium protein, unknown function                  |
| PVVCY_0701590 | 4.481  | 4.676  | 4.063  | 3.262  | 8.162 | conserved Plasmodium protein, unknown function                  |
| PVVCY_0100810 | 5.125  | 5.784  | 5.297  | 4.540  | 8.164 | conserved Plasmodium protein, unknown function                  |
| PVVCY_0500910 | 3.955  | 4.698  | 4.278  | 3.610  | 8.167 | conserved Plasmodium protein, unknown function                  |
| PVVCY_1400880 | 3.884  | 4.064  | 3.588  | 2.957  | 8.169 | conserved Plasmodium protein, unknown function                  |
| PVVCY_1004070 | 5.330  | 5.810  | 4.858  | 3.565  | 8.169 | radical SAM protein, putative                                   |
| PVVCY_0700850 | 5.033  | 5.676  | 5.023  | 4.091  | 8.171 | mediator of RNA polymerase II transcription subunit 7, putative |
| PVVCY_0600790 | 8.912  | 9.562  | 9.079  | 8.351  | 8.171 | U6 snRNA-associated Sm-like protein LSm7, putative              |
| PVVCY_1405300 | 6.462  | 6.676  | 6.281  | 5.740  | 8.172 | conserved Plasmodium protein, unknown function                  |
| PVVCY_1302920 | 8.473  | 9.122  | 8.465  | 7.495  | 8.172 | conserved Plasmodium protein, unknown function                  |
| PVVCY_1304940 | 12.303 | 12.356 | 11.916 | 11.358 | 8.173 | 60S ribosomal protein L23, putative                             |
| PVVCY_1201420 | 3.218  | 3.866  | 3.507  | 2.929  | 8.174 | FAD synthetase, putative                                        |
| PVVCY_1202950 | 5.705  | 6.506  | 6.432  | 6.167  | 8.176 | sentrin-specific protease 2, putative                           |
| PVVCY_0400520 | 7.426  | 7.509  | 6.868  | 6.068  | 8.177 | activator of Hsp90 ATPase, putative                             |
| PVVCY_1306180 | 7.173  | 7.093  | 6.661  | 6.152  | 8.180 | conserved Plasmodium protein, unknown function                  |

|               |        |        |        |        |       |                                                                         |
|---------------|--------|--------|--------|--------|-------|-------------------------------------------------------------------------|
| PVVCY_1102870 | 5.735  | 6.006  | 5.362  | 4.516  | 8.180 | glutamyl-tRNA(Gln) amidotransferase subunit B, putative                 |
| PVVCY_1203990 | 8.300  | 8.212  | 7.713  | 7.113  | 8.182 | ribosome-interacting GTPase 1, putative                                 |
| PVVCY_0802090 | 12.061 | 11.851 | 11.114 | 10.246 | 8.183 | phosphoglycerate kinase, putative                                       |
| PVVCY_1405810 | 6.224  | 6.365  | 5.763  | 4.995  | 8.184 | protein farnesyltransferase subunit alpha, putative                     |
| PVVCY_1102690 | 5.923  | 6.493  | 5.972  | 5.181  | 8.186 | mitochondrial ribosomal protein L46 precursor, putative                 |
| PVVCY_1203670 | 3.828  | 4.837  | 4.373  | 3.577  | 8.186 | conserved Plasmodium protein, unknown function                          |
| PVVCY_1201570 | 6.260  | 6.673  | 6.332  | 5.819  | 8.189 | conserved Plasmodium protein, unknown function                          |
| PVVCY_1304520 | 6.146  | 6.699  | 6.617  | 6.376  | 8.190 | conserved Plasmodium protein, unknown function                          |
| PVVCY_1103290 | 5.990  | 6.046  | 5.801  | 5.489  | 8.191 | histone-lysine N-methyltransferase, putative                            |
| PVVCY_0902630 | 7.173  | 7.486  | 7.099  | 6.537  | 8.191 | prefoldin subunit 5, putative                                           |
| PVVCY_1404210 | 4.767  | 4.569  | 3.991  | 3.318  | 8.192 | isoleucine--tRNA ligase, putative                                       |
| PVVCY_1004160 | 8.355  | 8.509  | 8.085  | 7.529  | 8.192 | RNA-binding protein 8A, putative                                        |
| PVVCY_1402430 | 4.618  | 4.867  | 4.115  | 3.111  | 8.193 | RAP protein, putative                                                   |
| PVVCY_1002760 | 3.703  | 4.166  | 3.791  | 3.206  | 8.193 | conserved Plasmodium protein, unknown function                          |
| PVVCY_1401070 | 7.537  | 7.964  | 7.611  | 7.062  | 8.194 | conserved protein, unknown function                                     |
| PVVCY_1406250 | 8.692  | 8.922  | 8.339  | 7.544  | 8.211 | FK506-binding protein (FKBP)-type peptidyl- prolyl isomerase, putative  |
| PVVCY_1403380 | 4.311  | 5.233  | 4.509  | 3.352  | 8.212 | conserved Plasmodium protein, unknown function                          |
| PVVCY_0601660 | 4.297  | 4.975  | 4.106  | 2.826  | 8.216 | conserved Plasmodium protein, unknown function                          |
| PVVCY_1301240 | 12.153 | 11.983 | 11.584 | 11.123 | 8.217 | 40S ribosomal protein S5, putative                                      |
| PVVCY_1102410 | 5.656  | 6.474  | 6.156  | 5.535  | 8.217 | conserved Plasmodium protein, unknown function                          |
| PVVCY_1405840 | 8.149  | 8.513  | 8.019  | 7.296  | 8.224 | mitochondrial import inner membrane translocase subunit TIM13, putative |
| PVVCY_1400460 | 6.407  | 6.785  | 5.994  | 4.887  | 8.226 | conserved Plasmodium protein, unknown function                          |
| PVVCY_1301890 | 10.879 | 10.769 | 10.238 | 9.592  | 8.229 | co-chaperone p23, putative                                              |
| PVVCY_1202610 | 5.853  | 6.451  | 5.669  | 4.506  | 8.237 | acetyltransferase, putative                                             |
| PVVCY_1301820 | 4.949  | 5.962  | 5.765  | 5.231  | 8.240 | conserved Plasmodium protein, unknown function                          |
| PVVCY_1101210 | 6.211  | 6.515  | 5.980  | 5.212  | 8.244 | EKC_KEOPS complex subunit CGI121, putative                              |
| PVVCY_0902340 | 6.755  | 6.956  | 6.332  | 5.476  | 8.247 | DNA-directed RNA polymerase, putative                                   |

|               |        |        |        |        |       |                                                                |
|---------------|--------|--------|--------|--------|-------|----------------------------------------------------------------|
| PVVCY_1302560 | 7.364  | 8.041  | 7.609  | 6.863  | 8.249 | ubiquitin carboxyl-terminal hydrolase isozyme L3, putative     |
| PVVCY_1403400 | 8.286  | 8.232  | 7.913  | 7.520  | 8.250 | signal recognition particle subunit SRP19, putative            |
| PVVCY_0904510 | 5.939  | 6.861  | 6.760  | 6.365  | 8.256 | protein YIPF6, putative                                        |
| PVVCY_0700830 | 3.843  | 4.150  | 3.495  | 2.561  | 8.258 | conserved Plasmodium protein, unknown function                 |
| PVVCY_1403190 | 5.774  | 5.718  | 5.242  | 4.644  | 8.261 | GPI ethanolamine phosphate transferase 3, putative             |
| PVVCY_0803260 | 4.774  | 6.736  | 6.379  | 5.346  | 8.262 | conserved Plasmodium protein, unknown function                 |
| PVVCY_0300350 | 3.963  | 4.252  | 3.744  | 3.003  | 8.263 | 3'-5' exonuclease, putative                                    |
| PVVCY_0300360 | 5.543  | 6.303  | 5.692  | 4.679  | 8.266 | methyltransferase, putative                                    |
| PVVCY_0601440 | 7.111  | 8.068  | 7.918  | 7.439  | 8.270 | transcription initiation factor IIA subunit 1, putative        |
| PVVCY_1304050 | 2.805  | 3.662  | 3.370  | 2.734  | 8.273 | conserved Plasmodium protein, unknown function                 |
| PVVCY_1102280 | 8.673  | 8.714  | 8.190  | 7.497  | 8.274 | leucine--tRNA ligase, putative                                 |
| PVVCY_1201730 | 12.014 | 12.375 | 11.600 | 10.485 | 8.274 | peptidyl-prolyl cis-trans isomerase, putative                  |
| PVVCY_1101300 | 4.494  | 5.220  | 4.550  | 3.460  | 8.277 | conserved Plasmodium protein, unknown function                 |
| PVVCY_0201220 | 3.750  | 5.267  | 5.102  | 4.424  | 8.282 | conserved Plasmodium protein, unknown function                 |
| PVVCY_0300740 | 6.304  | 6.646  | 6.006  | 5.066  | 8.283 | 2C-methyl-D-erythritol 2,4-cyclodiphosphate synthase, putative |
| PVVCY_1000460 | 4.347  | 4.665  | 3.813  | 2.603  | 8.285 | RNA helicase, putative                                         |
| PVVCY_0301680 | 6.642  | 6.755  | 6.191  | 5.419  | 8.285 | pseudouridine synthase, putative                               |
| PVVCY_1100730 | 6.688  | 6.941  | 6.375  | 5.555  | 8.297 | transcription factor 25, putative                              |
| PVVCY_1404320 | 9.618  | 10.384 | 9.930  | 9.089  | 8.305 | haloacid dehalogenase-like hydrolase, putative                 |
| PVVCY_1304110 | 3.709  | 4.836  | 4.947  | 4.735  | 8.306 | acetyltransferase, GNAT family, putative                       |
| PVVCY_0200760 | 6.121  | 6.670  | 5.908  | 4.725  | 8.310 | conserved Plasmodium protein, unknown function                 |
| PVVCY_0100720 | 2.138  | 2.637  | 2.222  | 1.515  | 8.311 | uroporphyrinogen III decarboxylase, putative                   |
| PVVCY_0803020 | 8.480  | 9.513  | 9.243  | 8.556  | 8.311 | proteasome subunit beta type-6, putative                       |
| PVVCY_1200530 | 3.820  | 3.787  | 3.243  | 2.533  | 8.320 | conserved Plasmodium protein, unknown function                 |
| PVVCY_1403000 | 6.071  | 6.170  | 5.645  | 4.913  | 8.326 | conserved Plasmodium protein, unknown function                 |
| PVVCY_0903220 | 4.279  | 5.036  | 4.488  | 3.506  | 8.330 | conserved Plasmodium protein, unknown function                 |
| PVVCY_0200510 | 4.242  | 4.766  | 4.481  | 3.926  | 8.331 | conserved Plasmodium protein, unknown function                 |



|               |        |        |        |        |       |                                                             |
|---------------|--------|--------|--------|--------|-------|-------------------------------------------------------------|
| PVVCY_1406580 | 5.556  | 6.352  | 6.067  | 5.418  | 8.335 | DNA repair protein rhp16, putative                          |
| PVVCY_0300420 | 4.713  | 5.742  | 5.719  | 5.342  | 8.336 | conserved Plasmodium protein, unknown function              |
| PVVCY_0802910 | 4.500  | 5.215  | 5.208  | 4.957  | 8.338 | conserved Plasmodium protein, unknown function              |
| PVVCY_1302740 | 8.661  | 9.340  | 8.948  | 8.191  | 8.341 | conserved Plasmodium protein, unknown function              |
| PVVCY_0903940 | 3.830  | 5.561  | 5.697  | 5.290  | 8.341 | conserved Plasmodium protein, unknown function              |
| PVVCY_0400280 | 4.562  | 5.876  | 5.286  | 4.047  | 8.342 | plasmoredoxin, putative                                     |
| PVVCY_0901950 | 4.931  | 4.885  | 4.618  | 4.276  | 8.344 | conserved Plasmodium protein, unknown function              |
| PVVCY_1306510 | 9.406  | 9.501  | 9.156  | 8.658  | 8.350 | glutamate-tRNA ligase, putative                             |
| PVVCY_1000530 | 12.841 | 12.819 | 12.429 | 11.912 | 8.354 | 60S ribosomal protein L37, putative                         |
| PVVCY_1201790 | 6.527  | 6.624  | 6.004  | 5.133  | 8.356 | peptidase, putative                                         |
| PVVCY_1402190 | 7.037  | 7.400  | 7.171  | 6.733  | 8.360 | negative elongation factor A, putative                      |
| PVVCY_1103420 | 6.683  | 6.540  | 6.201  | 5.793  | 8.361 | DnaJ protein, putative                                      |
| PVVCY_0400740 | 8.881  | 8.910  | 8.182  | 7.183  | 8.366 | activator of Hsp90 ATPase, putative                         |
| PVVCY_0700130 | 8.071  | 8.938  | 8.533  | 7.672  | 8.367 | U6 snRNA-associated Sm-like protein LSm8, putative          |
| PVVCY_1301310 | 5.082  | 5.443  | 5.130  | 4.574  | 8.376 | conserved Plasmodium protein, unknown function              |
| PVVCY_1303320 | 5.485  | 6.349  | 6.176  | 5.628  | 8.378 | 50S ribosomal protein L22, apicoplast, putative             |
| PVVCY_1301040 | 6.218  | 6.581  | 5.966  | 4.993  | 8.381 | conserved Plasmodium protein, unknown function              |
| PVVCY_1400390 | 5.404  | 5.258  | 4.653  | 3.880  | 8.382 | conserved Plasmodium protein, unknown function              |
| PVVCY_1201450 | 7.798  | 7.753  | 7.263  | 6.610  | 8.383 | methionine aminopeptidase 1b, putative                      |
| PVVCY_0502530 | 15.736 | 15.490 | 14.711 | 13.736 | 8.384 | early transcribed membrane protein                          |
| PVVCY_1103760 | 7.475  | 7.510  | 7.219  | 6.809  | 8.386 | ER membrane protein complex subunit 3, putative             |
| PVVCY_0903160 | 5.268  | 5.543  | 5.266  | 4.783  | 8.394 | glycine cleavage system H protein, putative                 |
| PVVCY_0903690 | 3.436  | 4.606  | 4.180  | 3.153  | 8.395 | conserved Plasmodium protein, unknown function              |
| PVVCY_1400310 | 5.953  | 5.438  | 4.812  | 4.143  | 8.398 | conserved Plasmodium protein, unknown function              |
| PVVCY_1305240 | 6.059  | 6.522  | 6.371  | 5.987  | 8.400 | conserved Plasmodium protein, unknown function              |
| PVVCY_1201610 | 4.784  | 5.610  | 5.231  | 4.393  | 8.403 | conserved Plasmodium protein, unknown function              |
| PVVCY_1100370 | 5.820  | 6.450  | 6.047  | 5.250  | 8.405 | 4-diphosphocytidyl-2-C-methyl-D-erythritol kinase, putative |

|               |        |        |       |       |       |                                                                  |
|---------------|--------|--------|-------|-------|-------|------------------------------------------------------------------|
| PVVCY_0900600 | 5.480  | 5.889  | 5.398 | 4.562 | 8.406 | DEAD_DEAH box helicase, putative                                 |
| PVVCY_0601630 | 5.683  | 6.798  | 6.317 | 5.223 | 8.407 | mitochondrial ribosomal protein S8 precursor, putative           |
| PVVCY_1303880 | 4.578  | 5.925  | 5.988 | 5.559 | 8.408 | GTPase-activating protein, putative                              |
| PVVCY_1204350 | 8.699  | 9.580  | 9.396 | 8.801 | 8.409 | proteasome maturation factor UMP1, putative                      |
| PVVCY_1002770 | 8.439  | 8.170  | 7.781 | 7.345 | 8.413 | glycine--tRNA ligase, putative                                   |
| PVVCY_0600370 | 6.071  | 6.291  | 5.784 | 4.994 | 8.413 | cytidine deaminase, putative                                     |
| PVVCY_1302210 | 6.890  | 7.602  | 7.269 | 6.526 | 8.416 | conserved protein, unknown function                              |
| PVVCY_0500960 | 5.536  | 6.221  | 5.495 | 4.212 | 8.421 | conserved Plasmodium protein, unknown function                   |
| PVVCY_1201440 | 7.539  | 7.285  | 6.817 | 6.265 | 8.424 | cysteine--tRNA ligase, putative                                  |
| PVVCY_0301130 | 4.985  | 5.528  | 5.035 | 4.129 | 8.428 | tetratricopeptide repeat protein, putative                       |
| PVVCY_1001660 | 4.761  | 5.292  | 4.919 | 4.183 | 8.429 | HID1 domain-containing protein, putative                         |
| PVVCY_1304820 | 5.313  | 6.110  | 5.841 | 5.135 | 8.440 | conserved Plasmodium protein, unknown function                   |
| PVVCY_1401000 | 7.096  | 7.548  | 6.725 | 5.380 | 8.442 | conserved Plasmodium protein, unknown function                   |
| PVVCY_1305440 | 4.653  | 4.951  | 4.764 | 4.377 | 8.442 | conserved Plasmodium protein, unknown function                   |
| PVVCY_1406450 | 8.892  | 8.887  | 7.981 | 6.706 | 8.444 | cutA, putative                                                   |
| PVVCY_1002290 | 4.787  | 4.975  | 4.578 | 3.938 | 8.445 | conserved Plasmodium protein, unknown function                   |
| PVVCY_1401590 | 5.968  | 6.051  | 5.848 | 5.527 | 8.446 | transcription factor MYB1, putative                              |
| PVVCY_0802530 | 6.540  | 7.168  | 6.878 | 6.206 | 8.448 | replication termination factor, putative                         |
| PVVCY_1301620 | 5.383  | 5.998  | 5.241 | 3.913 | 8.449 | acetyl-CoA acetyltransferase, putative                           |
| PVVCY_1202570 | 4.313  | 4.946  | 4.771 | 4.254 | 8.463 | conserved protein, unknown function                              |
| PVVCY_1002630 | 5.220  | 5.821  | 5.461 | 4.696 | 8.463 | mitochondrial ribosomal protein L21 precursor, putative          |
| PVVCY_1203650 | 10.604 | 10.578 | 9.869 | 8.869 | 8.465 | adenosylhomocysteinase, putative                                 |
| PVVCY_0200620 | 5.254  | 5.444  | 5.050 | 4.407 | 8.467 | 2-C-methyl-D-erythritol 4-phosphate cytidyltransferase, putative |
| PVVCY_1103440 | 6.879  | 7.930  | 7.352 | 6.079 | 8.468 | cdc2-related kinase 2, putative                                  |
| PVVCY_1400530 | 5.641  | 6.470  | 6.499 | 6.188 | 8.468 | conserved Plasmodium protein, unknown function                   |
| PVVCY_0700770 | 6.867  | 6.998  | 6.814 | 6.495 | 8.471 | conserved Plasmodium protein, unknown function                   |
| PVVCY_1303760 | 3.780  | 3.940  | 3.793 | 3.514 | 8.471 | conserved Plasmodium protein, unknown function                   |

|               |        |        |        |        |       |                                                                                             |
|---------------|--------|--------|--------|--------|-------|---------------------------------------------------------------------------------------------|
| PVVCY_1104240 | 6.484  | 6.755  | 6.535  | 6.106  | 8.471 | glycine cleavage system T protein, putative aminomethyltransferase, mitochondrial, putative |
| PVVCY_0902970 | 4.071  | 4.290  | 3.749  | 2.882  | 8.472 | conserved Plasmodium protein, unknown function                                              |
| PVVCY_1003170 | 5.025  | 5.531  | 5.126  | 4.329  | 8.473 | conserved Plasmodium protein, unknown function                                              |
| PVVCY_0801050 | 9.288  | 9.332  | 8.663  | 7.688  | 8.474 | mitochondrial acidic protein MAM33, putative                                                |
| PVVCY_0902170 | 5.895  | 7.150  | 6.597  | 5.260  | 8.475 | mitochondrial ribosomal protein L37, putative                                               |
| PVVCY_1102790 | 5.446  | 6.233  | 5.667  | 4.511  | 8.479 | 6-pyruvoyltetrahydropterin synthase, putative                                               |
| PVVCY_0401010 | 7.442  | 7.428  | 6.978  | 6.335  | 8.484 | phosphatidylinositol 3- and 4-kinase, putative                                              |
| PVVCY_1000690 | 3.894  | 4.644  | 4.168  | 3.151  | 8.485 | cytoskeleton associated protein, putative                                                   |
| PVVCY_1406240 | 4.635  | 4.853  | 4.549  | 4.016  | 8.486 | GPI mannosyltransferase 2, putative                                                         |
| PVVCY_0601150 | 5.204  | 5.653  | 5.165  | 4.263  | 8.487 | pantothenate kinase, putative                                                               |
| PVVCY_1305700 | 6.095  | 6.380  | 5.735  | 4.677  | 8.488 | RNA lariat debranching enzyme, putative                                                     |
| PVVCY_0301010 | 8.299  | 8.104  | 7.797  | 7.439  | 8.488 | peptide chain release factor subunit 1, putative                                            |
| PVVCY_0900410 | 7.135  | 6.999  | 6.409  | 5.619  | 8.489 | metabolite drug transporter, putative                                                       |
| PVVCY_1304280 | 8.918  | 9.464  | 8.958  | 7.984  | 8.490 | U6 snRNA-associated Sm-like protein LSm6, putative                                          |
| PVVCY_1302790 | 13.100 | 13.025 | 12.333 | 11.365 | 8.493 | glyceraldehyde-3-phosphate dehydrogenase, putative                                          |
| PVVCY_1303550 | 6.884  | 7.585  | 7.162  | 6.234  | 8.497 | conserved Plasmodium protein, unknown function                                              |
| PVVCY_1301520 | 4.911  | 5.640  | 5.995  | 6.181  | 8.500 | conserved Plasmodium protein, unknown function                                              |
| PVVCY_0701490 | 3.603  | 4.273  | 4.544  | 4.634  | 8.501 | ubiquitin, putative                                                                         |
| PVVCY_1203690 | 5.205  | 5.608  | 5.226  | 4.488  | 8.501 | conserved Plasmodium protein, unknown function                                              |
| PVVCY_0900620 | 5.972  | 6.187  | 5.662  | 4.800  | 8.503 | protein kinase, putative                                                                    |
| PVVCY_1201180 | 8.460  | 8.310  | 7.843  | 7.231  | 8.503 | GMP synthase [glutamine-hydrolyzing], putative                                              |
| PVVCY_0401750 | 4.333  | 6.047  | 6.419  | 6.179  | 8.505 | conserved Plasmodium protein, unknown function                                              |
| PVVCY_0800880 | 5.841  | 6.617  | 5.960  | 4.637  | 8.514 | GTP-binding protein, putative                                                               |
| PVVCY_1403910 | 7.509  | 7.554  | 7.221  | 6.712  | 8.518 | conserved Plasmodium protein, unknown function                                              |
| PVVCY_1406050 | 3.185  | 3.846  | 3.224  | 2.000  | 8.520 | conserved Plasmodium protein, unknown function                                              |
| PVVCY_1403250 | 5.578  | 6.153  | 5.853  | 5.137  | 8.528 | conserved Plasmodium protein, unknown function                                              |
| PVVCY_1001190 | 4.339  | 4.228  | 3.752  | 3.103  | 8.528 | conserved Plasmodium protein, unknown function                                              |

|               |        |        |        |        |       |                                                       |
|---------------|--------|--------|--------|--------|-------|-------------------------------------------------------|
| PVVCY_1302480 | 6.726  | 7.571  | 6.845  | 5.373  | 8.529 | pyridoxal 5'-phosphate synthase, putative             |
| PVVCY_1401900 | 8.182  | 8.475  | 7.557  | 6.060  | 8.531 | conserved Plasmodium protein, unknown function        |
| PVVCY_1001910 | 5.904  | 6.204  | 5.442  | 4.173  | 8.531 | autophagy protein 5, putative                         |
| PVVCY_0802140 | 8.470  | 8.550  | 8.189  | 7.613  | 8.539 | DNA-directed RNA polymerase II subunit RPB3, putative |
| PVVCY_1404680 | 5.431  | 5.561  | 5.039  | 4.200  | 8.543 | conserved Plasmodium protein, unknown function        |
| PVVCY_0400190 | 6.618  | 7.298  | 7.021  | 6.277  | 8.543 | CDGSH iron-sulfur domain-containing protein, putative |
| PVVCY_0600160 | 7.092  | 8.037  | 7.502  | 6.243  | 8.544 | peptidyl-prolyl cis-trans isomerase, putative         |
| PVVCY_1201030 | 4.457  | 4.916  | 4.689  | 4.128  | 8.544 | conserved Plasmodium protein, unknown function        |
| PVVCY_1403990 | 3.995  | 4.268  | 3.808  | 2.989  | 8.544 | conserved Plasmodium protein, unknown function        |
| PVVCY_1306620 | 5.153  | 5.614  | 5.150  | 4.232  | 8.545 | ubiquitin-activating enzyme E1, putative              |
| PVVCY_0802990 | 5.622  | 6.156  | 6.173  | 5.934  | 8.551 | conserved Plasmodium protein, unknown function        |
| PVVCY_1305370 | 6.169  | 6.510  | 5.987  | 5.035  | 8.553 | 1-deoxy-D-xylulose 5-phosphate synthase, putative     |
| PVVCY_0901820 | 12.200 | 12.252 | 11.592 | 10.575 | 8.560 | phosphoglycerate mutase, putative                     |
| PVVCY_0501730 | 5.022  | 5.926  | 5.537  | 4.495  | 8.566 | conserved Plasmodium protein, unknown function        |
| PVVCY_1100750 | 6.118  | 7.040  | 6.623  | 5.528  | 8.567 | conserved Plasmodium protein, unknown function        |
| PVVCY_0100770 | 5.551  | 5.745  | 5.046  | 3.893  | 8.569 | GTP-binding protein, putative                         |
| PVVCY_1001060 | 7.561  | 8.141  | 7.586  | 6.454  | 8.570 | conserved Plasmodium protein, unknown function        |
| PVVCY_0300560 | 4.499  | 5.023  | 4.894  | 4.433  | 8.571 | iron-sulfur assembly protein, putative                |
| PVVCY_1405660 | 6.048  | 6.173  | 5.657  | 4.813  | 8.574 | 3-hydroxyisobutyryl-coenzyme A hydrolase, putative    |
| PVVCY_1300760 | 5.807  | 6.804  | 6.569  | 5.702  | 8.576 | ADP-ribosylation factor, putative                     |
| PVVCY_0602260 | 5.808  | 5.835  | 5.603  | 5.237  | 8.577 | conserved Plasmodium protein, unknown function        |
| PVVCY_1100550 | 4.236  | 4.486  | 4.283  | 3.848  | 8.577 | conserved Plasmodium protein, unknown function        |
| PVVCY_0901590 | 4.639  | 5.727  | 5.502  | 4.599  | 8.580 | peptidyl-tRNA hydrolase ICT1, putative                |
| PVVCY_1402310 | 8.208  | 8.174  | 7.679  | 6.943  | 8.584 | 4-nitrophenylphosphatase, putative                    |
| PVVCY_0401100 | 2.909  | 3.390  | 3.389  | 3.137  | 8.584 | tetratricopeptide repeat protein, putative            |
| PVVCY_0901110 | 4.928  | 5.145  | 4.781  | 4.114  | 8.586 | conserved protein, unknown function                   |
| PVVCY_0901010 | 3.818  | 4.462  | 4.370  | 3.891  | 8.588 | conserved Plasmodium protein, unknown function        |

|               |        |        |        |        |       |                                                         |
|---------------|--------|--------|--------|--------|-------|---------------------------------------------------------|
| PVVCY_0800230 | 7.295  | 7.272  | 6.967  | 6.515  | 8.589 | conserved Plasmodium protein, unknown function          |
| PVVCY_0601220 | 4.996  | 5.193  | 4.728  | 3.916  | 8.591 | conserved Plasmodium protein, unknown function          |
| PVVCY_1103640 | 7.701  | 7.726  | 7.254  | 6.518  | 8.591 | GTP-binding protein, putative                           |
| PVVCY_1100570 | 6.057  | 6.449  | 6.212  | 5.643  | 8.592 | actin-like protein, putative                            |
| PVVCY_0200600 | 4.338  | 4.465  | 3.808  | 2.735  | 8.596 | conserved Plasmodium protein, unknown function          |
| PVVCY_1101720 | 7.311  | 7.296  | 6.969  | 6.472  | 8.604 | malate:quinone oxidoreductase, putative                 |
| PVVCY_0802390 | 7.569  | 8.036  | 7.663  | 6.834  | 8.608 | zinc binding protein (Yippee), putative                 |
| PVVCY_0600320 | 2.997  | 4.581  | 4.840  | 4.373  | 8.615 | conserved Plasmodium protein, unknown function          |
| PVVCY_0400370 | 5.488  | 6.122  | 6.066  | 5.629  | 8.618 | 1-cys-glutaredoxin-like protein-1, putative             |
| PVVCY_0401300 | 2.845  | 4.038  | 4.525  | 4.621  | 8.618 | conserved Plasmodium protein, unknown function          |
| PVVCY_0100590 | 2.945  | 4.659  | 4.949  | 4.453  | 8.620 | DNA repair protein RAD50, putative                      |
| PVVCY_1401770 | 4.821  | 5.867  | 6.038  | 5.723  | 8.622 | conserved Plasmodium protein, unknown function          |
| PVVCY_0903480 | 8.372  | 8.506  | 7.985  | 7.101  | 8.622 | tudor staphylococcal nuclease, putative                 |
| PVVCY_1100680 | 5.675  | 6.157  | 5.568  | 4.383  | 8.623 | conserved Plasmodium protein, unknown function          |
| PVVCY_0601780 | 7.517  | 7.604  | 7.205  | 6.533  | 8.624 | exosome complex component CSL4, putative                |
| PVVCY_0602210 | 5.225  | 5.895  | 5.642  | 4.876  | 8.624 | 3-demethylubiquinone-9 3-methyltransferase, putative    |
| PVVCY_0100510 | 6.813  | 7.712  | 7.498  | 6.655  | 8.633 | 50S ribosomal protein L24, putative                     |
| PVVCY_1101570 | 5.096  | 6.060  | 5.551  | 4.203  | 8.637 | conserved Plasmodium protein, unknown function          |
| PVVCY_1401740 | 6.570  | 7.167  | 6.884  | 6.095  | 8.642 | conserved Plasmodium protein, unknown function          |
| PVVCY_1306050 | 5.082  | 5.969  | 5.494  | 4.235  | 8.644 | U6 snRNA phosphodiesterase, putative                    |
| PVVCY_0100990 | 6.995  | 7.356  | 6.758  | 5.606  | 8.644 | mitochondrial ribosomal protein L19 precursor, putative |
| PVVCY_0801180 | 6.786  | 7.323  | 7.041  | 6.286  | 8.645 | conserved Plasmodium protein, unknown function          |
| PVVCY_0701420 | 4.504  | 5.543  | 6.299  | 6.893  | 8.645 | EF-hand calcium-binding domain-containing protein       |
| PVVCY_0600330 | 2.046  | 3.874  | 4.204  | 3.665  | 8.647 | conserved Plasmodium protein, unknown function          |
| PVVCY_0902900 | 11.913 | 11.681 | 11.243 | 10.687 | 8.649 | 60S acidic ribosomal protein P0, putative               |
| PVVCY_0600580 | 5.207  | 5.649  | 5.065  | 3.883  | 8.651 | conserved Plasmodium protein, unknown function          |
| PVVCY_1402590 | 6.656  | 7.306  | 6.985  | 6.099  | 8.652 | large ribosomal subunit processing factor, putative     |

|               |        |        |        |        |       |                                                                          |
|---------------|--------|--------|--------|--------|-------|--------------------------------------------------------------------------|
| PVVCY_0400220 | 7.127  | 6.991  | 6.673  | 6.248  | 8.652 | N-ethylmaleimide-sensitive fusion protein, putative                      |
| PVVCY_0900690 | 6.885  | 7.277  | 6.865  | 5.984  | 8.654 | prefoldin, putative                                                      |
| PVVCY_1200380 | 5.222  | 5.715  | 5.386  | 4.575  | 8.658 | conserved Plasmodium protein, unknown function                           |
| PVVCY_1401470 | 4.695  | 4.995  | 4.788  | 4.283  | 8.659 | lipoate-protein ligase 1, putative                                       |
| PVVCY_0500190 | 4.813  | 6.080  | 5.909  | 4.889  | 8.659 | enoyl-CoA hydratase-related protein, putative                            |
| PVVCY_0401520 | 6.946  | 7.448  | 7.217  | 6.553  | 8.660 | inorganic pyrophosphatase, putative                                      |
| PVVCY_0300500 | 4.347  | 4.608  | 3.999  | 2.875  | 8.660 | pentafunctional AROM polypeptide, putative                               |
| PVVCY_1001860 | 8.018  | 8.877  | 9.049  | 8.808  | 8.669 | cytochrome c oxidase subunit 2, putative                                 |
| PVVCY_1304270 | 13.000 | 13.085 | 12.435 | 11.343 | 8.671 | L-lactate dehydrogenase, putative                                        |
| PVVCY_1000740 | 11.344 | 11.423 | 11.084 | 10.492 | 8.672 | heat shock protein 90, putative                                          |
| PVVCY_0300730 | 7.413  | 7.336  | 6.884  | 6.203  | 8.677 | 3' exoribonuclease, putative                                             |
| PVVCY_0900400 | 8.690  | 9.230  | 8.738  | 7.618  | 8.677 | DNA-directed RNA polymerase III subunit RPC8, putative                   |
| PVVCY_0201140 | 3.043  | 3.598  | 3.257  | 2.373  | 8.678 | conserved Plasmodium protein, unknown function                           |
| PVVCY_0500980 | 5.335  | 5.606  | 5.322  | 4.699  | 8.682 | glutamine--fructose-6-phosphate aminotransferase [isomerizing], putative |
| PVVCY_0500250 | 4.593  | 4.646  | 4.093  | 3.171  | 8.682 | conserved Plasmodium protein, unknown function                           |
| PVVCY_1002120 | 9.150  | 9.580  | 9.180  | 8.272  | 8.683 | proliferation-associated protein 2g4, putative                           |
| PVVCY_1405960 | 6.339  | 6.487  | 6.173  | 5.574  | 8.686 | RNA polymerase II transcription factor B subunit 2, putative             |
| PVVCY_1101250 | 6.313  | 7.296  | 6.819  | 5.442  | 8.689 | conserved Plasmodium protein, unknown function                           |
| PVVCY_1002750 | 5.648  | 5.802  | 5.471  | 4.840  | 8.690 | pantothenate kinase, putative                                            |
| PVVCY_1400480 | 4.156  | 4.541  | 4.067  | 3.061  | 8.691 | conserved Plasmodium protein, unknown function                           |
| PVVCY_1200650 | 6.371  | 6.786  | 6.530  | 5.860  | 8.691 | conserved Plasmodium protein, unknown function                           |
| PVVCY_0501850 | 6.744  | 7.203  | 7.176  | 6.846  | 8.696 | apicoplast ribosomal protein L27 precursor, putative                     |
| PVVCY_1401360 | 5.379  | 5.340  | 4.582  | 3.374  | 8.698 | translation initiation factor IF-2, putative                             |
| PVVCY_1400850 | 11.305 | 11.438 | 11.168 | 10.644 | 8.699 | 40S ribosomal protein S27, putative                                      |
| PVVCY_1100640 | 7.912  | 8.242  | 8.049  | 7.526  | 8.703 | conserved Plasmodium protein, unknown function                           |
| PVVCY_1000900 | 5.047  | 5.750  | 5.302  | 4.126  | 8.703 | conserved Plasmodium protein, unknown function                           |
| PVVCY_1303100 | 6.375  | 6.697  | 6.280  | 5.394  | 8.706 | conserved Plasmodium protein, unknown function                           |

|               |       |       |       |       |       |                                                         |
|---------------|-------|-------|-------|-------|-------|---------------------------------------------------------|
| PVVCY_1203580 | 7.136 | 7.558 | 7.032 | 5.903 | 8.708 | protein phosphatase PPM9, putative                      |
| PVVCY_0701530 | 7.920 | 8.299 | 8.371 | 8.247 | 8.709 | phosphoglucosyltransferase-2, putative                  |
| PVVCY_1404580 | 6.336 | 6.232 | 5.661 | 4.792 | 8.713 | conserved Plasmodium protein, unknown function          |
| PVVCY_1406070 | 4.983 | 5.909 | 5.525 | 4.300 | 8.713 | mitochondrial ribosomal protein L3 precursor, putative  |
| PVVCY_1405050 | 6.435 | 6.857 | 6.682 | 6.124 | 8.713 | conserved Plasmodium protein, unknown function          |
| PVVCY_0601680 | 6.997 | 7.235 | 6.932 | 6.279 | 8.716 | conserved Plasmodium protein, unknown function          |
| PVVCY_1406430 | 7.725 | 7.736 | 7.169 | 6.230 | 8.717 | protein phosphatase PPM4, putative                      |
| PVVCY_0601450 | 4.515 | 5.110 | 4.454 | 2.991 | 8.717 | conserved Plasmodium protein, unknown function          |
| PVVCY_0401080 | 6.676 | 7.373 | 7.007 | 5.951 | 8.721 | conserved Plasmodium protein, unknown function          |
| PVVCY_0901770 | 6.906 | 7.163 | 7.016 | 6.608 | 8.721 | AP-4 complex subunit mu, putative                       |
| PVVCY_0701360 | 5.012 | 6.047 | 5.957 | 5.136 | 8.721 | NEDD8-activating enzyme E1 catalytic subunit, putative  |
| PVVCY_1204000 | 5.207 | 5.668 | 5.312 | 4.418 | 8.730 | conserved Plasmodium protein, unknown function          |
| PVVCY_0802200 | 2.445 | 3.739 | 3.545 | 2.369 | 8.730 | lipote-protein ligase 2, putative                       |
| PVVCY_0501710 | 6.706 | 6.937 | 6.453 | 5.496 | 8.733 | leucine-rich repeat protein                             |
| PVVCY_1303850 | 4.031 | 6.062 | 6.440 | 5.722 | 8.733 | conserved Plasmodium protein, unknown function          |
| PVVCY_0901230 | 6.642 | 7.293 | 6.842 | 5.658 | 8.735 | glyoxalase I, putative                                  |
| PVVCY_0802000 | 5.503 | 6.183 | 6.220 | 5.831 | 8.736 | conserved Plasmodium protein, unknown function          |
| PVVCY_0800890 | 4.266 | 4.760 | 4.214 | 2.978 | 8.736 | conserved Plasmodium protein, unknown function          |
| PVVCY_1405800 | 5.770 | 6.313 | 6.089 | 5.351 | 8.738 | conserved Plasmodium protein, unknown function          |
| PVVCY_1300890 | 8.110 | 8.872 | 8.609 | 7.659 | 8.741 | U6 snRNA-associated Sm-like protein LSM5, putative      |
| PVVCY_1001340 | 6.088 | 6.119 | 5.415 | 4.218 | 8.742 | selenide water dikinase, putative                       |
| PVVCY_0901290 | 5.394 | 6.092 | 5.796 | 4.833 | 8.742 | conserved Plasmodium protein, unknown function          |
| PVVCY_1402400 | 7.271 | 7.542 | 7.246 | 6.570 | 8.743 | cation diffusion facilitator family protein, putative   |
| PVVCY_0600870 | 4.529 | 5.408 | 5.594 | 5.313 | 8.744 | 50S ribosomal protein L1, apicoplast, putative          |
| PVVCY_1004220 | 4.140 | 5.168 | 4.828 | 3.568 | 8.744 | DNA mismatch repair protein, putative                   |
| PVVCY_0601020 | 4.855 | 5.961 | 5.723 | 4.578 | 8.745 | mitochondrial ribosomal protein S18 precursor, putative |
| PVVCY_0601640 | 8.027 | 8.482 | 7.939 | 6.719 | 8.748 | prefoldin subunit 3, putative                           |

|               |        |        |        |       |       |                                                                     |
|---------------|--------|--------|--------|-------|-------|---------------------------------------------------------------------|
| PVVCY_0301050 | 5.248  | 5.900  | 5.605  | 4.667 | 8.749 | SRR1-like protein                                                   |
| PVVCY_1402920 | 5.831  | 5.794  | 5.406  | 4.778 | 8.749 | ABC1 family, putative                                               |
| PVVCY_1305970 | 5.104  | 5.415  | 5.094  | 4.343 | 8.750 | UDP-N-acetylglucosamine pyrophosphorylase, putative                 |
| PVVCY_1103870 | 5.986  | 6.718  | 6.607  | 5.919 | 8.752 | iron-sulfur assembly protein, putative                              |
| PVVCY_1300420 | 6.751  | 6.699  | 6.410  | 5.959 | 8.754 | cleavage and polyadenylation specificity factor subunit 3, putative |
| PVVCY_1201350 | 6.025  | 6.667  | 6.188  | 4.941 | 8.755 | conserved Plasmodium protein, unknown function                      |
| PVVCY_0902360 | 8.563  | 8.848  | 8.570  | 7.905 | 8.755 | small nuclear ribonucleoprotein Sm D1, putative                     |
| PVVCY_0401440 | 5.656  | 6.521  | 6.173  | 4.993 | 8.756 | mitochondrial ribosomal protein L29/L47 precursor, putative         |
| PVVCY_0301390 | 4.047  | 4.044  | 3.645  | 2.975 | 8.756 | conserved Plasmodium protein, unknown function                      |
| PVVCY_0800100 | 6.387  | 6.736  | 6.320  | 5.380 | 8.756 | regulator of chromosome condensation, putative                      |
| PVVCY_0803280 | 7.839  | 8.939  | 8.799  | 7.806 | 8.758 | transcription factor with AP2 domain(s), putative                   |
| PVVCY_0501890 | 6.421  | 6.416  | 6.244  | 5.955 | 8.761 | translation initiation factor IF-3, putative                        |
| PVVCY_0600290 | 10.712 | 10.666 | 10.339 | 9.818 | 8.762 | nucleosome assembly protein, putative                               |
| PVVCY_0500990 | 4.640  | 5.230  | 4.665  | 3.301 | 8.763 | ATP synthase mitochondrial F1 complex assembly factor 2, putative   |
| PVVCY_1301080 | 4.947  | 5.478  | 5.012  | 3.854 | 8.765 | mitochondrial ribosomal protein S29 precursor, putative             |
| PVVCY_1402070 | 7.725  | 8.110  | 7.932  | 7.362 | 8.766 | RNA-binding protein, putative                                       |
| PVVCY_1305600 | 2.348  | 3.457  | 3.446  | 2.651 | 8.767 | conserved Plasmodium protein, unknown function                      |
| PVVCY_0300750 | 6.671  | 7.498  | 7.009  | 5.599 | 8.767 | conserved protein, unknown function                                 |
| PVVCY_1404340 | 3.528  | 3.684  | 3.393  | 2.788 | 8.767 | RAP protein, putative                                               |
| PVVCY_0600960 | 3.291  | 3.876  | 4.022  | 3.861 | 8.768 | GPI mannosyltransferase 1, putative                                 |
| PVVCY_0502400 | 5.705  | 6.421  | 6.044  | 4.902 | 8.769 | conserved Plasmodium protein, unknown function                      |
| PVVCY_0301090 | 8.817  | 8.552  | 8.148  | 7.646 | 8.769 | protein SIS1, putative                                              |
| PVVCY_1304790 | 4.932  | 5.541  | 5.608  | 5.296 | 8.769 | conserved Plasmodium protein, unknown function                      |
| PVVCY_0300970 | 4.359  | 4.998  | 5.022  | 4.611 | 8.776 | conserved Plasmodium protein, unknown function                      |
| PVVCY_1000730 | 6.917  | 7.055  | 6.622  | 5.782 | 8.778 | EKC_KEOPS complex subunit BUD32, putative                           |
| PVVCY_0502230 | 5.795  | 6.279  | 6.020  | 5.231 | 8.782 | holo-[acyl-carrier-protein] synthase, putative                      |
| PVVCY_0802810 | 4.352  | 5.092  | 5.340  | 5.233 | 8.782 | conserved Plasmodium protein, unknown function                      |



|               |        |        |        |        |       |                                                          |
|---------------|--------|--------|--------|--------|-------|----------------------------------------------------------|
| PVVCY_1401110 | 7.025  | 7.379  | 7.110  | 6.393  | 8.785 | mitochondrial ribosomal protein S15 precursor, putative  |
| PVVCY_0501510 | 6.015  | 6.007  | 5.685  | 5.136  | 8.790 | tRNA N6-adenosine threonylcarbamoyltransferase, putative |
| PVVCY_1000920 | 5.022  | 5.805  | 5.792  | 5.201  | 8.793 | conserved Plasmodium protein, unknown function           |
| PVVCY_0903560 | 4.668  | 5.417  | 5.174  | 4.208  | 8.794 | mitochondrial ribosomal protein S9 precursor, putative   |
| PVVCY_0301080 | 5.943  | 6.910  | 6.678  | 5.568  | 8.796 | conserved Plasmodium protein, unknown function           |
| PVVCY_0701040 | 6.558  | 6.558  | 6.286  | 5.812  | 8.798 | phosphatidylglycerophosphate synthase, putative          |
| PVVCY_0701090 | 3.811  | 4.338  | 4.681  | 4.889  | 8.801 | conserved Plasmodium protein, unknown function           |
| PVVCY_0400480 | 10.917 | 11.461 | 11.021 | 9.855  | 8.801 | ubiquitin-conjugating enzyme E2, putative                |
| PVVCY_1400340 | 6.751  | 6.904  | 6.437  | 5.510  | 8.804 | SNARE protein, putative                                  |
| PVVCY_1003630 | 3.835  | 4.228  | 4.057  | 3.467  | 8.806 | GTP-binding protein, putative                            |
| PVVCY_0803170 | 3.233  | 4.435  | 4.635  | 4.091  | 8.807 | conserved Plasmodium protein, unknown function           |
| PVVCY_1303860 | 4.444  | 6.008  | 6.219  | 5.421  | 8.810 | dihydroorotase, putative                                 |
| PVVCY_1303660 | 8.551  | 9.497  | 9.453  | 8.667  | 8.810 | proteasome subunit beta type-2, putative                 |
| PVVCY_0901120 | 4.729  | 5.775  | 5.907  | 5.355  | 8.810 | conserved Plasmodium protein, unknown function           |
| PVVCY_1403870 | 4.118  | 4.494  | 3.866  | 2.488  | 8.810 | conserved Plasmodium protein, unknown function           |
| PVVCY_1201510 | 12.707 | 12.657 | 12.062 | 11.058 | 8.811 | enolase, putative                                        |
| PVVCY_0901390 | 6.572  | 6.987  | 6.757  | 6.041  | 8.815 | transcription factor with AP2 domain(s), putative        |
| PVVCY_1400350 | 5.731  | 6.046  | 5.722  | 4.916  | 8.815 | conserved Plasmodium protein, unknown function           |
| PVVCY_0901090 | 3.267  | 4.013  | 3.683  | 2.540  | 8.817 | conserved Plasmodium protein, unknown function           |
| PVVCY_1200270 | 5.967  | 6.557  | 6.185  | 5.083  | 8.820 | conserved Plasmodium protein, unknown function           |
| PVVCY_1103260 | 5.283  | 5.659  | 5.711  | 5.517  | 8.823 | conserved Plasmodium protein, unknown function           |
| PVVCY_0401200 | 4.102  | 5.105  | 5.424  | 5.219  | 8.824 | conserved Plasmodium protein, unknown function           |
| PVVCY_1403300 | 6.076  | 7.157  | 6.763  | 5.243  | 8.824 | peptidyl-prolyl cis-trans isomerase, putative            |
| PVVCY_0401390 | 3.413  | 5.327  | 6.117  | 6.044  | 8.829 | zinc finger protein, putative                            |
| PVVCY_1102970 | 5.085  | 5.807  | 5.803  | 5.237  | 8.833 | cullin-like protein, putative                            |
| PVVCY_0100620 | 6.628  | 6.924  | 6.659  | 5.959  | 8.835 | RNA-binding protein, putative                            |
| PVVCY_1400650 | 4.386  | 5.100  | 4.609  | 3.178  | 8.837 | SAM dependent methyltransferase, putative                |

|               |       |       |       |       |       |                                                                                       |
|---------------|-------|-------|-------|-------|-------|---------------------------------------------------------------------------------------|
| PVVCY_0200960 | 6.295 | 6.413 | 6.151 | 5.593 | 8.838 | conserved Plasmodium protein, unknown function                                        |
| PVVCY_0300330 | 5.094 | 5.157 | 4.629 | 3.638 | 8.838 | 5'-3' exonuclease, putative                                                           |
| PVVCY_1400570 | 4.329 | 4.680 | 4.238 | 3.176 | 8.842 | mitogen-activated protein kinase phosphatase 1, putative                              |
| PVVCY_0300490 | 3.905 | 4.038 | 3.472 | 2.355 | 8.842 | pentafunctional AROM polypeptide, putative                                            |
| PVVCY_1003740 | 7.045 | 7.675 | 7.302 | 6.140 | 8.844 | conserved Plasmodium protein, unknown function                                        |
| PVVCY_1001840 | 3.783 | 4.378 | 4.316 | 3.735 | 8.844 | conserved Plasmodium protein, unknown function                                        |
| PVVCY_1200220 | 6.241 | 6.977 | 6.634 | 5.442 | 8.845 | ribosome-binding factor A, putative                                                   |
| PVVCY_0901480 | 4.716 | 5.570 | 5.004 | 3.316 | 8.845 | dolichyl-diphosphooligosaccharide--protein glycosyltransferase subunit STT3, putative |
| PVVCY_1400490 | 5.397 | 6.224 | 6.228 | 5.582 | 8.846 | cyclin, putative                                                                      |
| PVVCY_1406530 | 6.177 | 6.860 | 7.018 | 6.761 | 8.846 | vacuolar protein sorting-associated protein 26, putative                              |
| PVVCY_0901450 | 6.434 | 7.117 | 6.876 | 5.902 | 8.848 | peptidyl-prolyl cis-trans isomerase, putative                                         |
| PVVCY_1404180 | 5.348 | 6.634 | 6.796 | 6.060 | 8.852 | conserved Plasmodium protein, unknown function                                        |
| PVVCY_0802920 | 4.597 | 4.812 | 4.433 | 3.580 | 8.853 | conserved Plasmodium protein, unknown function                                        |
| PVVCY_1203720 | 6.594 | 6.564 | 6.145 | 5.414 | 8.854 | ATP-dependent RNA helicase DDX1, putative                                             |
| PVVCY_1002560 | 5.811 | 6.422 | 6.049 | 4.885 | 8.858 | actin-related protein, putative                                                       |
| PVVCY_1102850 | 5.116 | 6.002 | 6.059 | 5.446 | 8.859 | conserved Plasmodium protein, unknown function                                        |
| PVVCY_0500800 | 7.748 | 8.270 | 7.758 | 6.411 | 8.861 | conserved Plasmodium protein, unknown function                                        |
| PVVCY_1404740 | 5.554 | 5.656 | 5.366 | 4.754 | 8.867 | sun-family protein, putative                                                          |
| PVVCY_0700630 | 4.336 | 5.660 | 5.897 | 5.248 | 8.867 | conserved Plasmodium protein, unknown function                                        |
| PVVCY_1300260 | 5.206 | 5.791 | 5.626 | 4.848 | 8.868 | cytochrome c oxidase assembly protein COX11, putative                                 |
| PVVCY_0902880 | 2.776 | 4.636 | 4.917 | 3.907 | 8.869 | phosphoacetylglucosamine mutase, putative                                             |
| PVVCY_0300690 | 6.827 | 7.245 | 6.977 | 6.146 | 8.871 | conserved Plasmodium protein, unknown function                                        |
| PVVCY_1305500 | 4.262 | 4.579 | 4.120 | 3.023 | 8.871 | conserved Plasmodium protein, unknown function                                        |
| PVVCY_1101430 | 7.906 | 8.299 | 8.147 | 7.547 | 8.872 | ras-related protein Rab-1A, putative                                                  |
| PVVCY_1000910 | 6.947 | 6.827 | 6.383 | 5.673 | 8.873 | 26S proteasome non-ATPase regulatory subunit 9, putative                              |
| PVVCY_0802110 | 6.128 | 6.379 | 6.521 | 6.572 | 8.875 | pre-mRNA-splicing factor 18, putative                                                 |
| PVVCY_0501180 | 5.567 | 5.821 | 5.449 | 4.560 | 8.876 | mitochondrial ribosomal protein S22 precursor, putative                               |

|               |       |       |       |       |       |                                                                        |
|---------------|-------|-------|-------|-------|-------|------------------------------------------------------------------------|
| PVVCY_1200660 | 7.437 | 8.230 | 7.954 | 6.792 | 8.876 | conserved Plasmodium protein, unknown function                         |
| PVVCY_1404480 | 5.953 | 6.708 | 6.445 | 5.339 | 8.876 | conserved Plasmodium protein, unknown function                         |
| PVVCY_1000830 | 6.042 | 5.782 | 5.149 | 4.206 | 8.878 | cleavage and polyadenylation specificity factor, putative              |
| PVVCY_0701930 | 7.516 | 7.672 | 7.029 | 5.722 | 8.878 | memo-like protein                                                      |
| PVVCY_1104030 | 4.699 | 5.699 | 5.517 | 4.352 | 8.878 | bifunctional polynucleotide phosphatase/kinase, putative               |
| PVVCY_1103510 | 6.045 | 6.913 | 6.482 | 4.971 | 8.879 | conserved Plasmodium protein, unknown function                         |
| PVVCY_0803400 | 8.039 | 9.796 | 9.909 | 8.649 | 8.881 | Plasmodium exported protein, unknown function                          |
| PVVCY_1103570 | 4.792 | 4.864 | 4.721 | 4.400 | 8.881 | conserved Plasmodium protein, unknown function                         |
| PVVCY_1302540 | 5.797 | 6.533 | 6.099 | 4.685 | 8.884 | conserved Plasmodium protein, unknown function                         |
| PVVCY_1203820 | 5.114 | 6.618 | 6.722 | 5.653 | 8.885 | iron-sulfur assembly protein, putative                                 |
| PVVCY_1101010 | 6.559 | 6.594 | 5.999 | 4.877 | 8.886 | asparagine--tRNA ligase, putative                                      |
| PVVCY_1103780 | 5.161 | 5.903 | 5.869 | 5.184 | 8.886 | conserved Plasmodium protein, unknown function                         |
| PVVCY_1104550 | 6.805 | 8.245 | 8.205 | 6.920 | 8.887 | mitochondrial import inner membrane translocase subunit TIM9, putative |
| PVVCY_1402870 | 6.643 | 6.903 | 6.564 | 5.720 | 8.888 | conserved Plasmodium protein, unknown function                         |
| PVVCY_0100800 | 5.383 | 6.016 | 5.866 | 5.053 | 8.892 | conserved Plasmodium protein, unknown function                         |
| PVVCY_1302600 | 5.083 | 5.577 | 5.477 | 4.871 | 8.893 | snRNA-activating protein complex subunit 3, putative                   |
| PVVCY_1300270 | 5.479 | 5.846 | 5.617 | 4.879 | 8.897 | conserved protein, unknown function                                    |
| PVVCY_0700840 | 6.320 | 6.903 | 6.462 | 5.144 | 8.898 | quinone oxidoreductase, putative                                       |
| PVVCY_1101710 | 4.279 | 4.699 | 4.608 | 4.082 | 8.898 | ras GTPase, putative                                                   |
| PVVCY_1201090 | 7.692 | 7.782 | 7.644 | 7.312 | 8.898 | DNA repair protein RAD23, putative                                     |
| PVVCY_1204660 | 6.085 | 6.486 | 6.144 | 5.166 | 8.901 | mitochondrial ribosomal protein S16 precursor, putative                |
| PVVCY_0803160 | 5.243 | 6.860 | 7.170 | 6.357 | 8.901 | calcyclin binding protein, putative                                    |
| PVVCY_0901920 | 6.052 | 6.780 | 6.553 | 5.506 | 8.901 | conserved Plasmodium protein, unknown function                         |
| PVVCY_0800510 | 7.509 | 8.138 | 8.245 | 7.905 | 8.902 | peptidyl-tRNA hydrolase 2, putative                                    |
| PVVCY_0903270 | 8.734 | 8.230 | 7.694 | 7.132 | 8.903 | heat shock protein 70, putative                                        |
| PVVCY_0700710 | 1.319 | 1.910 | 2.132 | 2.034 | 8.904 | alpha_beta hydrolase, putative                                         |
| PVVCY_1400540 | 5.081 | 6.083 | 6.201 | 5.552 | 8.907 | transcription factor with AP2 domain(s), putative                      |

|               |       |       |       |       |       |                                                                    |
|---------------|-------|-------|-------|-------|-------|--------------------------------------------------------------------|
| PVVCY_1300790 | 8.738 | 8.830 | 8.566 | 7.994 | 8.909 | tRNA import protein tRIP, putative                                 |
| PVVCY_0601370 | 5.935 | 6.513 | 6.274 | 5.322 | 8.911 | mitochondrial ribosomal protein S12 precursor, putative            |
| PVVCY_1404500 | 4.689 | 4.805 | 4.260 | 3.140 | 8.912 | conserved Plasmodium protein, unknown function                     |
| PVVCY_1302450 | 6.872 | 7.100 | 6.953 | 6.477 | 8.915 | conserved Plasmodium protein, unknown function                     |
| PVVCY_0800450 | 6.042 | 6.861 | 6.704 | 5.692 | 8.915 | conserved Plasmodium protein, unknown function                     |
| PVVCY_0401510 | 3.659 | 4.900 | 5.017 | 4.147 | 8.916 | conserved Plasmodium protein, unknown function                     |
| PVVCY_1104050 | 4.989 | 5.446 | 5.376 | 4.842 | 8.916 | polyubiquitin binding protein, putative                            |
| PVVCY_0200330 | 5.583 | 5.929 | 5.579 | 4.614 | 8.920 | selenocysteine-specific elongation factor selB homologue, putative |
| PVVCY_1303990 | 7.516 | 8.270 | 8.253 | 7.553 | 8.922 | adenosine-diphosphatase, putative                                  |
| PVVCY_0501880 | 4.224 | 5.056 | 4.924 | 3.938 | 8.922 | conserved Plasmodium protein, unknown function                     |
| PVVCY_0201270 | 6.325 | 6.793 | 6.743 | 6.235 | 8.923 | RNA-binding protein, putative                                      |
| PVVCY_1202060 | 5.669 | 6.008 | 5.700 | 4.816 | 8.924 | glutaredoxin-like protein                                          |
| PVVCY_1401190 | 1.661 | 3.643 | 4.132 | 3.291 | 8.924 | telomerase reverse transcriptase, putative                         |
| PVVCY_1304320 | 4.298 | 4.815 | 4.498 | 3.440 | 8.925 | conserved Plasmodium protein, unknown function                     |
| PVVCY_0200470 | 5.493 | 5.911 | 5.662 | 4.817 | 8.926 | conserved Plasmodium protein, unknown function                     |
| PVVCY_1102230 | 4.844 | 5.179 | 4.918 | 4.125 | 8.928 | vacuolar transporter chaperone, putative                           |
| PVVCY_1302800 | 5.425 | 5.436 | 5.151 | 4.603 | 8.928 | conserved Plasmodium protein, unknown function                     |
| PVVCY_0803230 | 7.212 | 6.957 | 6.623 | 6.217 | 8.931 | conserved Plasmodium protein, unknown function                     |
| PVVCY_1402000 | 5.439 | 5.689 | 5.296 | 4.325 | 8.931 | TBC domain protein, putative                                       |
| PVVCY_1305310 | 8.015 | 8.834 | 8.525 | 7.196 | 8.934 | conserved Plasmodium protein, unknown function                     |
| PVVCY_1004210 | 4.835 | 5.530 | 5.119 | 3.702 | 8.939 | COBW domain-containing protein 1, putative                         |
| PVVCY_1406560 | 5.996 | 6.139 | 5.944 | 5.439 | 8.942 | translation initiation factor eIF-2B subunit beta, putative        |
| PVVCY_1102670 | 7.706 | 8.049 | 7.741 | 6.838 | 8.942 | conserved protein, unknown function                                |
| PVVCY_0200410 | 5.731 | 7.144 | 7.394 | 6.575 | 8.946 | tubulin-specific chaperone $\alpha$ , putative                     |
| PVVCY_0700220 | 4.883 | 5.753 | 5.581 | 4.451 | 8.946 | mitochondrial inner membrane protein OXA1, putative                |
| PVVCY_1405040 | 4.737 | 5.176 | 4.836 | 3.774 | 8.950 | homocysteine S-methyltransferase, putative                         |
| PVVCY_1300730 | 5.532 | 5.999 | 5.664 | 4.586 | 8.950 | mitochondrial inner membrane protease ATP23, putative              |

|               |        |        |        |        |       |                                                                   |
|---------------|--------|--------|--------|--------|-------|-------------------------------------------------------------------|
| PVVCY_0502010 | 5.688  | 6.467  | 6.246  | 5.098  | 8.951 | phosducin-like protein, putative                                  |
| PVVCY_1401010 | 4.604  | 5.465  | 4.803  | 2.724  | 8.953 | conserved Plasmodium protein, unknown function                    |
| PVVCY_1303360 | 5.365  | 7.287  | 7.938  | 7.404  | 8.954 | conserved Plasmodium protein, unknown function                    |
| PVVCY_1101880 | 3.260  | 3.744  | 3.583  | 2.820  | 8.954 | conserved Plasmodium protein, unknown function                    |
| PVVCY_0300200 | 5.528  | 6.640  | 6.776  | 6.000  | 8.955 | ERCC1 nucleotide excision repair protein, putative                |
| PVVCY_0900870 | 5.826  | 6.730  | 6.427  | 4.996  | 8.956 | conserved Plasmodium protein, unknown function                    |
| PVVCY_1404620 | 9.307  | 9.563  | 9.120  | 8.021  | 8.958 | T-complex protein 1 subunit gamma, putative                       |
| PVVCY_1406380 | 6.863  | 7.586  | 7.074  | 5.401  | 8.960 | conserved Plasmodium protein, unknown function                    |
| PVVCY_1001700 | 7.546  | 8.256  | 7.963  | 6.725  | 8.962 | protein-L-isoaspartate(D-aspartate) O-methyltransferase, putative |
| PVVCY_0501560 | 6.733  | 7.085  | 6.645  | 5.459  | 8.962 | conserved Plasmodium protein, unknown function                    |
| PVVCY_1402580 | 5.305  | 5.812  | 5.781  | 5.242  | 8.963 | conserved Plasmodium protein, unknown function                    |
| PVVCY_1003820 | 3.855  | 4.667  | 4.475  | 3.330  | 8.965 | conserved Plasmodium protein, unknown function                    |
| PVVCY_1401280 | 5.041  | 5.331  | 5.120  | 4.431  | 8.965 | peptidyl-prolyl cis-trans isomerase, putative                     |
| PVVCY_1002110 | 2.266  | 3.682  | 3.982  | 3.219  | 8.969 | protein kinase, putative                                          |
| PVVCY_1100930 | 7.176  | 7.572  | 7.483  | 6.929  | 8.972 | single-stranded DNA-binding protein, putative                     |
| PVVCY_0803270 | 4.920  | 6.858  | 7.548  | 7.043  | 8.972 | conserved Plasmodium protein, unknown function                    |
| PVVCY_1003680 | 7.241  | 7.331  | 7.217  | 6.907  | 8.972 | conserved Plasmodium protein, unknown function                    |
| PVVCY_0400720 | 8.518  | 8.827  | 8.455  | 7.429  | 8.973 | T-complex protein 1 subunit eta, putative                         |
| PVVCY_0800630 | 5.813  | 6.175  | 5.669  | 4.325  | 8.975 | conserved Plasmodium protein, unknown function                    |
| PVVCY_0901400 | 10.732 | 11.261 | 11.000 | 9.979  | 8.975 | peptidyl-prolyl cis-trans isomerase, putative                     |
| PVVCY_0301310 | 5.314  | 5.738  | 5.625  | 4.994  | 8.976 | conserved Plasmodium protein, unknown function                    |
| PVVCY_1001090 | 7.641  | 8.223  | 8.422  | 8.252  | 8.977 | subunit of proteasome activator complex, putative                 |
| PVVCY_0200590 | 6.249  | 6.664  | 6.154  | 4.748  | 8.979 | carbon catabolite repressor protein 4, putative                   |
| PVVCY_1002690 | 11.597 | 11.736 | 11.469 | 10.809 | 8.982 | 40S ribosomal protein S25, putative                               |
| PVVCY_0800860 | 5.622  | 5.949  | 5.805  | 5.202  | 8.983 | ribosome biogenesis GTPase A, putative                            |
| PVVCY_0903590 | 5.760  | 6.067  | 5.722  | 4.743  | 8.985 | UVB-resistance protein UVR8 homologue, putative                   |
| PVVCY_0701870 | 3.948  | 4.544  | 4.396  | 3.520  | 8.986 | conserved Plasmodium protein, unknown function                    |

|               |       |       |       |       |       |                                                              |
|---------------|-------|-------|-------|-------|-------|--------------------------------------------------------------|
| PVVCY_0902010 | 3.326 | 5.576 | 6.249 | 5.377 | 8.987 | GPI transamidase component GPI16, putative                   |
| PVVCY_1002050 | 5.959 | 6.767 | 6.948 | 6.513 | 8.988 | apicoplast ribosomal protein L15 precursor, putative         |
| PVVCY_0501030 | 7.762 | 8.483 | 7.840 | 5.853 | 8.990 | cytochrome c oxidase copper chaperone, putative              |
| PVVCY_1403880 | 4.569 | 6.032 | 6.277 | 5.321 | 8.991 | protein TSSC1, putative                                      |
| PVVCY_1305350 | 4.603 | 5.233 | 4.899 | 3.615 | 8.991 | endopeptidase, putative                                      |
| PVVCY_1000070 | 0.533 | 1.372 | 1.539 | 1.040 | 8.993 | PIR protein CIR protein                                      |
| PVVCY_0601690 | 4.800 | 6.680 | 7.480 | 7.213 | 8.993 | conserved Plasmodium protein, unknown function               |
| PVVCY_0200850 | 6.718 | 6.559 | 6.200 | 5.643 | 8.996 | 4-hydroxy-3-methylbut-2-enyl diphosphate reductase, putative |
| PVVCY_0601270 | 4.677 | 4.491 | 4.059 | 3.382 | 8.999 | conserved Plasmodium protein, unknown function               |
| PVVCY_1101270 | 6.182 | 6.412 | 6.192 | 5.523 | 8.999 | CDK-activating kinase assembly factor, putative              |
| PVVCY_1401860 | 5.436 | 5.981 | 5.794 | 4.873 | 9.001 | conserved Plasmodium protein, unknown function               |
| PVVCY_1405210 | 3.955 | 4.249 | 4.094 | 3.488 | 9.003 | tetQ family GTPase, putative                                 |
| PVVCY_0600510 | 6.443 | 7.057 | 6.777 | 5.597 | 9.004 | shewanella-like protein phosphatase 2, putative              |
| PVVCY_1401990 | 7.115 | 7.833 | 7.784 | 6.959 | 9.006 | ATP-dependent Clp protease adapter protein ClpS, putative    |
| PVVCY_0801170 | 7.321 | 7.359 | 6.999 | 6.236 | 9.007 | conserved Plasmodium protein, unknown function               |
| PVVCY_0200980 | 5.378 | 5.652 | 5.560 | 5.096 | 9.009 | vacuolar protein sorting-associated protein 51, putative     |
| PVVCY_0900920 | 6.233 | 6.613 | 6.694 | 6.474 | 9.009 | vacuolar protein sorting-associated protein 35, putative     |
| PVVCY_0803070 | 8.902 | 9.223 | 8.779 | 7.559 | 9.009 | M18 aspartyl aminopeptidase, putative                        |
| PVVCY_1303580 | 3.955 | 4.182 | 3.928 | 3.185 | 9.013 | conserved Plasmodium protein, unknown function               |
| PVVCY_0502000 | 5.238 | 5.897 | 5.709 | 4.655 | 9.014 | conserved Plasmodium protein, unknown function               |
| PVVCY_1003790 | 7.457 | 7.473 | 7.318 | 6.989 | 9.014 | ER membrane protein complex subunit 2, putative              |
| PVVCY_1304240 | 1.301 | 2.148 | 2.353 | 1.900 | 9.015 | conserved Plasmodium protein, unknown function               |
| PVVCY_0301580 | 3.008 | 3.737 | 3.804 | 3.197 | 9.015 | conserved Plasmodium protein, unknown function               |
| PVVCY_1404050 | 3.213 | 4.295 | 4.510 | 3.839 | 9.015 | conserved Plasmodium protein, unknown function               |
| PVVCY_0100790 | 5.793 | 6.267 | 5.925 | 4.746 | 9.017 | diphthine methyltransferase, putative                        |
| PVVCY_0902690 | 0.889 | 2.098 | 2.841 | 3.107 | 9.018 | GPI-anchor transamidase, putative                            |
| PVVCY_0200540 | 3.158 | 4.156 | 4.122 | 3.023 | 9.019 | double-strand break repair protein MRE11, putative           |

|               |       |       |       |       |       |                                                                                |
|---------------|-------|-------|-------|-------|-------|--------------------------------------------------------------------------------|
| PVVCY_1300300 | 9.169 | 9.967 | 9.901 | 8.941 | 9.023 | proteasome subunit alpha type-1, putative                                      |
| PVVCY_1301610 | 5.586 | 6.135 | 5.732 | 4.341 | 9.024 | conserved Plasmodium protein, unknown function                                 |
| PVVCY_0100850 | 8.677 | 9.592 | 9.513 | 8.402 | 9.025 | proteasome subunit alpha type-2, putative                                      |
| PVVCY_0501910 | 5.488 | 6.103 | 5.743 | 4.369 | 9.025 | conserved Plasmodium protein, unknown function                                 |
| PVVCY_1000860 | 3.085 | 4.813 | 5.176 | 4.119 | 9.025 | conserved Plasmodium protein, unknown function                                 |
| PVVCY_0802510 | 7.154 | 7.246 | 7.017 | 6.454 | 9.026 | glutamine-dependent NAD(+) synthetase, putative                                |
| PVVCY_1003460 | 5.185 | 5.556 | 5.325 | 4.467 | 9.027 | FeS assembly ATPase SufC, putative ABC transporter I family member 1, putative |
| PVVCY_1402720 | 6.120 | 6.439 | 6.077 | 5.006 | 9.028 | GTPase, putative                                                               |
| PVVCY_0801930 | 8.558 | 8.613 | 8.083 | 6.940 | 9.031 | ubiquitin-conjugating enzyme, putative                                         |
| PVVCY_1405690 | 4.922 | 5.307 | 4.962 | 3.853 | 9.032 | conserved Plasmodium protein, unknown function                                 |
| PVVCY_1103150 | 8.736 | 9.684 | 9.664 | 8.625 | 9.034 | proteasome subunit alpha type-4, putative                                      |
| PVVCY_1305270 | 5.424 | 5.655 | 5.512 | 4.973 | 9.038 | conserved Plasmodium protein, unknown function                                 |
| PVVCY_0201390 | 6.348 | 6.677 | 6.262 | 5.058 | 9.038 | tRNA pseudouridine synthase D, putative                                        |
| PVVCY_0200320 | 5.763 | 6.259 | 6.144 | 5.380 | 9.038 | FAD-linked sulfhydryl oxidase ERV1, putative                                   |
| PVVCY_0100980 | 4.061 | 4.491 | 4.389 | 3.721 | 9.038 | conserved Plasmodium protein, unknown function                                 |
| PVVCY_0600360 | 5.107 | 5.719 | 5.767 | 5.219 | 9.039 | conserved Plasmodium protein, unknown function                                 |
| PVVCY_0200240 | 5.885 | 6.767 | 6.519 | 5.066 | 9.042 | conserved Plasmodium protein, unknown function                                 |
| PVVCY_0903100 | 5.260 | 6.962 | 7.761 | 7.593 | 9.045 | nucleic acid binding protein, putative                                         |
| PVVCY_0501200 | 8.201 | 8.605 | 8.489 | 7.816 | 9.045 | DNA-directed RNA polymerase II subunit RPB7, putative                          |
| PVVCY_1305360 | 4.738 | 5.739 | 5.723 | 4.616 | 9.045 | protein kinase 6, putative                                                     |
| PVVCY_0200170 | 8.175 | 8.586 | 8.429 | 7.662 | 9.046 | conserved protein, unknown function                                            |
| PVVCY_0801210 | 5.427 | 6.099 | 6.201 | 5.693 | 9.046 | conserved Plasmodium protein, unknown function                                 |
| PVVCY_1403280 | 4.231 | 5.884 | 6.253 | 5.244 | 9.046 | thioredoxin peroxidase 2, putative                                             |
| PVVCY_1403920 | 5.733 | 6.729 | 6.750 | 5.718 | 9.049 | conserved Plasmodium protein, unknown function                                 |
| PVVCY_0800580 | 3.818 | 5.139 | 5.553 | 4.989 | 9.050 | AAA family ATPase, putative                                                    |
| PVVCY_0100500 | 4.983 | 6.462 | 6.843 | 6.036 | 9.051 | conserved Plasmodium protein, unknown function                                 |
| PVVCY_0501660 | 4.367 | 4.514 | 4.123 | 3.149 | 9.052 | conserved Plasmodium protein, unknown function                                 |

|               |       |       |       |       |       |                                                                                                             |
|---------------|-------|-------|-------|-------|-------|-------------------------------------------------------------------------------------------------------------|
| PVVCY_1402710 | 2.419 | 4.079 | 4.213 | 2.690 | 9.053 | trypsin-like serine protease, putative                                                                      |
| PVVCY_0902420 | 4.516 | 5.160 | 5.014 | 4.012 | 9.053 | autophagy-related protein 7, putative                                                                       |
| PVVCY_0904280 | 5.815 | 6.674 | 6.743 | 5.955 | 9.053 | SUMO-activating enzyme subunit 1, putative                                                                  |
| PVVCY_1402060 | 7.598 | 8.050 | 7.907 | 7.116 | 9.053 | dihydrolipoyllysine-residue succinyltransferase component of 2-oxoglutarate dehydrogenase complex, putative |
| PVVCY_1103770 | 4.379 | 5.462 | 5.709 | 5.047 | 9.053 | conserved Plasmodium protein, unknown function                                                              |
| PVVCY_0100560 | 3.898 | 4.994 | 5.224 | 4.516 | 9.054 | cyclin dependent kinase binding protein, putative                                                           |
| PVVCY_1203610 | 4.704 | 6.267 | 7.008 | 6.851 | 9.057 | conserved Plasmodium protein, unknown function                                                              |
| PVVCY_1000650 | 6.222 | 6.746 | 6.669 | 5.935 | 9.057 | conserved Plasmodium protein, unknown function                                                              |
| PVVCY_1305620 | 5.137 | 7.308 | 8.035 | 7.181 | 9.058 | mitotic-spindle organizing protein 1, putative                                                              |
| PVVCY_0401500 | 5.556 | 6.447 | 6.422 | 5.392 | 9.060 | mitochondrial ribosomal protein L27 precursor, putative                                                     |
| PVVCY_1202480 | 2.504 | 3.905 | 4.459 | 4.081 | 9.062 | protein tyrosine phosphatase, putative                                                                      |
| PVVCY_1202460 | 4.790 | 5.386 | 5.215 | 4.199 | 9.063 | conserved Plasmodium protein, unknown function                                                              |
| PVVCY_1403210 | 6.800 | 6.848 | 6.675 | 6.258 | 9.064 | geranylgeranyl transferase type2 beta subunit, putative                                                     |
| PVVCY_1203500 | 5.058 | 5.451 | 5.397 | 4.849 | 9.064 | protoheme IX farnesyltransferase, putative                                                                  |
| PVVCY_1306310 | 5.346 | 6.085 | 6.019 | 5.064 | 9.065 | DNA topoisomerase 3, putative                                                                               |
| PVVCY_0502040 | 5.713 | 6.194 | 5.935 | 4.856 | 9.067 | pyruvate kinase 2, putative                                                                                 |
| PVVCY_0803360 | 5.990 | 5.851 | 5.592 | 5.197 | 9.067 | vacuolar protein sorting-associated protein 33, putative                                                    |
| PVVCY_1300810 | 5.362 | 5.713 | 5.409 | 4.376 | 9.068 | geranylgeranyl transferase type-2 subunit alpha, putative                                                   |
| PVVCY_0300830 | 7.761 | 8.803 | 8.641 | 7.142 | 9.069 | 50S ribosomal protein L33, putative                                                                         |
| PVVCY_0903700 | 4.500 | 5.500 | 5.550 | 4.541 | 9.071 | hypothetical protein                                                                                        |
| PVVCY_1004380 | 6.994 | 7.750 | 7.900 | 7.375 | 9.072 | selenoprotein, putative                                                                                     |
| PVVCY_0100390 | 5.049 | 5.380 | 4.905 | 3.528 | 9.072 | phenylalanine--tRNA ligase, putative                                                                        |
| PVVCY_0200830 | 4.739 | 4.653 | 4.154 | 3.192 | 9.073 | conserved Plasmodium protein, unknown function                                                              |
| PVVCY_1003110 | 8.086 | 8.537 | 8.073 | 6.584 | 9.073 | prefoldin subunit 2, putative                                                                               |
| PVVCY_0200750 | 5.785 | 5.936 | 5.710 | 5.063 | 9.074 | conserved Plasmodium protein, unknown function                                                              |
| PVVCY_1306500 | 6.380 | 6.892 | 6.678 | 5.651 | 9.074 | nucleoside diphosphate hydrolase, putative                                                                  |



|               |        |        |        |       |       |                                                                         |
|---------------|--------|--------|--------|-------|-------|-------------------------------------------------------------------------|
| PVVCY_0300950 | 6.692  | 7.031  | 6.752  | 5.778 | 9.075 | tyrosine kinase-like protein, putative                                  |
| PVVCY_1003010 | 6.926  | 8.627  | 9.095  | 8.176 | 9.075 | conserved Plasmodium protein, unknown function                          |
| PVVCY_1404090 | 6.266  | 7.043  | 6.889  | 5.689 | 9.076 | 50S ribosomal protein L24, putative                                     |
| PVVCY_0601840 | 8.418  | 8.957  | 8.800  | 7.860 | 9.077 | conserved Plasmodium protein, unknown function                          |
| PVVCY_1002270 | 6.905  | 6.698  | 6.358  | 5.869 | 9.078 | conserved Plasmodium protein, unknown function                          |
| PVVCY_1303290 | 5.036  | 5.580  | 5.427  | 4.484 | 9.080 | DNA-3-methyladenine glycosylase, putative                               |
| PVVCY_1406060 | 5.583  | 6.494  | 6.265  | 4.747 | 9.080 | NEDD8-conjugating enzyme UBC12, putative                                |
| PVVCY_0602270 | 3.702  | 5.047  | 5.228  | 4.093 | 9.081 | kelch domain-containing protein, putative                               |
| PVVCY_0101090 | 6.457  | 7.099  | 7.089  | 6.338 | 9.084 | transcription factor with AP2 domain(s), putative                       |
| PVVCY_1001850 | 6.844  | 7.314  | 7.106  | 6.126 | 9.084 | mitochondrial ribosomal protein L17-2 precursor, putative               |
| PVVCY_1201170 | 8.357  | 8.172  | 7.534  | 6.382 | 9.085 | phosphoglucomutase, putative                                            |
| PVVCY_0904010 | 5.965  | 6.806  | 6.824  | 5.902 | 9.088 | OTU domain-containing protein, putative                                 |
| PVVCY_0401530 | 5.259  | 5.768  | 5.568  | 4.558 | 9.088 | conserved Plasmodium protein, unknown function                          |
| PVVCY_0803250 | 6.998  | 7.217  | 6.928  | 6.058 | 9.089 | TFIIH basal transcription factor complex helicase XPD subunit, putative |
| PVVCY_0801550 | 4.486  | 5.044  | 5.023  | 4.339 | 9.089 | N-glycosylase_DNA lyase, putative                                       |
| PVVCY_1403240 | 7.833  | 8.190  | 7.797  | 6.540 | 9.092 | adrenodoxin-type ferredoxin, putative                                   |
| PVVCY_0201210 | 5.485  | 6.675  | 6.868  | 5.911 | 9.092 | conserved Plasmodium protein, unknown function                          |
| PVVCY_0800530 | 5.141  | 6.031  | 6.148  | 5.373 | 9.092 | conserved Plasmodium protein, unknown function                          |
| PVVCY_1404610 | 10.800 | 11.244 | 10.980 | 9.898 | 9.094 | macrophage migration inhibitory factor, putative                        |
| PVVCY_1003520 | 7.088  | 7.514  | 7.344  | 6.484 | 9.095 | glycylpeptide N-tetradecanoyltransferase, putative                      |
| PVVCY_1402620 | 5.374  | 6.442  | 6.468  | 5.287 | 9.096 | CS domain protein, putative                                             |
| PVVCY_1003090 | 4.806  | 5.634  | 5.457  | 4.111 | 9.098 | conserved Plasmodium protein, unknown function                          |
| PVVCY_0101270 | 8.084  | 9.025  | 8.882  | 7.476 | 9.098 | conserved Plasmodium protein, unknown function                          |
| PVVCY_1300460 | 10.671 | 10.930 | 10.610 | 9.617 | 9.100 | thioredoxin peroxidase 1, putative                                      |
| PVVCY_1404070 | 7.313  | 7.736  | 7.415  | 6.225 | 9.100 | vacuolar iron transporter, putative                                     |
| PVVCY_0401430 | 7.599  | 7.963  | 8.154  | 8.142 | 9.100 | conserved Plasmodium protein, unknown function                          |
| PVVCY_1301980 | 4.979  | 6.137  | 6.152  | 4.831 | 9.102 | mitochondrial ribosomal protein S11 precursor, putative                 |

|                   |        |        |        |       |       |                                                         |
|-------------------|--------|--------|--------|-------|-------|---------------------------------------------------------|
| PVVCY_1102300     | 5.785  | 6.523  | 6.337  | 5.071 | 9.103 | chorismate synthase, putative                           |
| PVVCY_1404700     | 5.146  | 5.629  | 5.222  | 3.769 | 9.104 | vacuolar transporter chaperone, putative                |
| PVVCY_0701110     | 2.726  | 3.219  | 3.374  | 3.132 | 9.104 | conserved protein, unknown function                     |
| PVVCY_0700620     | 5.777  | 5.716  | 5.117  | 3.885 | 9.108 | GTP-binding protein, putative                           |
| PVVCY_1102740     | 10.533 | 11.043 | 10.614 | 9.078 | 9.108 | protein DJ-1, putative                                  |
| PVVCY_0900660     | 5.617  | 6.073  | 5.822  | 4.738 | 9.109 | conserved Plasmodium protein, unknown function          |
| PVVCY_0401220     | 5.429  | 5.558  | 5.424  | 4.979 | 9.109 | conserved Plasmodium protein, unknown function          |
| PVVCY_1400560     | 5.272  | 5.547  | 5.295  | 4.421 | 9.111 | AAR2 protein, putative                                  |
| PVVCY_0601710     | 5.922  | 6.447  | 6.332  | 5.457 | 9.112 | actin-related protein, putative                         |
| PVVCY_1104200     | 7.836  | 8.254  | 7.767  | 6.204 | 9.114 | mitochondrial ribosomal protein S17 precursor, putative |
| PVVCY_1204640     | 6.931  | 7.149  | 7.032  | 6.516 | 9.115 | conserved Plasmodium protein, unknown function          |
| PVVCY_MIT_0100010 | 2.440  | 3.098  | 3.323  | 3.032 | 9.115 | cytochrome b                                            |
| PVVCY_0300680     | 6.313  | 7.181  | 7.064  | 5.772 | 9.116 | conserved Plasmodium protein, unknown function          |
| PVVCY_1001150     | 7.002  | 7.283  | 6.934  | 5.833 | 9.117 | conserved protein, unknown function                     |
| PVVCY_0901630     | 8.894  | 8.986  | 8.725  | 8.038 | 9.120 | AP-1 complex subunit sigma, putative                    |
| PVVCY_1100580     | 3.676  | 4.586  | 4.977  | 4.741 | 9.123 | UDP-N-acetylglucosamine transporter, putative           |
| PVVCY_1101960     | 4.413  | 4.337  | 4.033  | 3.452 | 9.124 | conserved Plasmodium protein, unknown function          |
| PVVCY_1302180     | 5.858  | 6.730  | 6.636  | 5.373 | 9.124 | mitochondrial ribosomal protein L28 precursor, putative |
| PVVCY_1402410     | 4.173  | 4.409  | 4.065  | 3.019 | 9.127 | FAD-dependent monooxygenase, putative                   |
| PVVCY_0803210     | 5.300  | 6.697  | 6.990  | 5.940 | 9.128 | conserved Plasmodium protein, unknown function          |
| PVVCY_1103880     | 6.328  | 7.706  | 8.390  | 8.228 | 9.129 | cytochrome c oxidase subunit 2, putative                |
| PVVCY_0801940     | 5.719  | 6.953  | 7.037  | 5.718 | 9.132 | conserved Plasmodium protein, unknown function          |
| PVVCY_1401950     | 6.394  | 7.316  | 7.256  | 5.995 | 9.132 | conserved Plasmodium protein, unknown function          |
| PVVCY_1406360     | 3.973  | 5.678  | 6.378  | 5.844 | 9.134 | conserved Plasmodium protein, unknown function          |
| PVVCY_0401760     | 6.349  | 6.829  | 6.574  | 5.414 | 9.135 | copper-transporting ATPase, putative                    |
| PVVCY_0904570     | 5.460  | 5.524  | 5.190  | 4.368 | 9.136 | protein farnesyltransferase subunit beta, putative      |
| PVVCY_1304440     | 2.252  | 3.977  | 4.786  | 4.468 | 9.137 | conserved Plasmodium protein, unknown function          |

|               |       |       |       |       |       |                                                                  |
|---------------|-------|-------|-------|-------|-------|------------------------------------------------------------------|
| PVVCY_1200010 | 2.327 | 3.102 | 3.180 | 2.392 | 9.140 | CIR protein PIR protein                                          |
| PVVCY_1200990 | 7.492 | 7.962 | 7.918 | 7.233 | 9.142 | dolichyl-phosphate-mannose protein mannosyltransferase, putative |
| PVVCY_1405580 | 6.311 | 7.221 | 7.043 | 5.511 | 9.143 | mitochondrial ribosomal protein L23 precursor, putative          |
| PVVCY_1203590 | 5.470 | 5.532 | 5.310 | 4.732 | 9.147 | conserved Plasmodium protein, unknown function                   |
| PVVCY_1403390 | 8.898 | 9.079 | 8.796 | 7.931 | 9.147 | glycerol-3-phosphate dehydrogenase, putative                     |
| PVVCY_0700300 | 5.185 | 5.691 | 5.542 | 4.569 | 9.150 | conserved Plasmodium protein, unknown function                   |
| PVVCY_0904110 | 5.978 | 6.791 | 7.078 | 6.705 | 9.152 | conserved Plasmodium protein, unknown function                   |
| PVVCY_0600860 | 4.834 | 5.356 | 5.427 | 4.930 | 9.153 | ABC transporter B family member 7, putative                      |
| PVVCY_0700510 | 5.667 | 7.309 | 8.059 | 7.684 | 9.153 | conserved Plasmodium protein, unknown function                   |
| PVVCY_0902400 | 7.707 | 8.100 | 8.049 | 7.435 | 9.154 | conserved Plasmodium protein, unknown function                   |
| PVVCY_0200840 | 6.962 | 7.475 | 7.426 | 6.666 | 9.154 | conserved protein, unknown function                              |
| PVVCY_1306530 | 6.255 | 6.134 | 5.741 | 5.001 | 9.154 | cytidine and deoxycytidylate deaminase, putative                 |
| PVVCY_1403720 | 6.660 | 7.102 | 6.927 | 5.971 | 9.155 | ribulose-phosphate 3-epimerase, putative                         |
| PVVCY_0800470 | 6.180 | 7.222 | 7.117 | 5.556 | 9.156 | ribosomal protein L25, putative                                  |
| PVVCY_1303210 | 3.249 | 4.743 | 5.168 | 4.236 | 9.156 | conserved Plasmodium protein, unknown function                   |
| PVVCY_1404630 | 4.902 | 5.768 | 6.214 | 6.123 | 9.157 | conserved Plasmodium protein, unknown function                   |
| PVVCY_1401140 | 6.825 | 7.016 | 6.842 | 6.200 | 9.161 | alternative splicing regulator, putative                         |
| PVVCY_0501340 | 7.523 | 8.693 | 9.115 | 8.572 | 9.166 | conserved Plasmodium protein, unknown function                   |
| PVVCY_1201600 | 4.857 | 5.269 | 4.828 | 3.287 | 9.166 | conserved protein, unknown function                              |
| PVVCY_1000790 | 7.201 | 8.639 | 8.790 | 7.274 | 9.169 | E3 ubiquitin-protein ligase RBX1, putative                       |
| PVVCY_0601210 | 5.497 | 5.567 | 5.158 | 4.124 | 9.171 | ATP-dependent Clp protease proteolytic subunit, putative         |
| PVVCY_1101240 | 8.262 | 8.887 | 8.789 | 7.755 | 9.171 | prefoldin subunit 6, putative                                    |
| PVVCY_0700980 | 5.676 | 6.168 | 6.135 | 5.418 | 9.173 | conserved Plasmodium protein, unknown function                   |
| PVVCY_0501630 | 5.872 | 5.955 | 5.595 | 4.656 | 9.173 | ribosome maturation factor RimM, putative                        |
| PVVCY_1100590 | 6.106 | 6.485 | 6.491 | 6.009 | 9.176 | conserved Plasmodium protein, unknown function                   |
| PVVCY_1304830 | 7.319 | 7.896 | 7.621 | 6.232 | 9.176 | elongation factor Tu, putative                                   |
| PVVCY_1302890 | 7.924 | 8.511 | 8.316 | 7.097 | 9.177 | mitochondrial ribosomal protein S6-2 precursor, putative         |

|               |       |       |       |       |       |                                                                         |
|---------------|-------|-------|-------|-------|-------|-------------------------------------------------------------------------|
| PVVCY_0701900 | 5.023 | 7.045 | 7.736 | 6.676 | 9.178 | bifunctional dihydrofolate reductase-thymidylate synthase, putative     |
| PVVCY_1104080 | 4.563 | 5.271 | 5.249 | 4.265 | 9.180 | conserved Plasmodium protein, unknown function                          |
| PVVCY_1104010 | 4.220 | 4.123 | 3.781 | 3.115 | 9.180 | conserved Plasmodium protein, unknown function                          |
| PVVCY_1004230 | 5.943 | 6.004 | 5.853 | 5.423 | 9.181 | conserved Plasmodium protein, unknown function                          |
| PVVCY_1401290 | 4.743 | 5.193 | 4.999 | 3.949 | 9.183 | methionyl-tRNA formyltransferase, putative                              |
| PVVCY_1102860 | 5.871 | 5.794 | 5.383 | 4.530 | 9.184 | conserved Plasmodium protein, unknown function                          |
| PVVCY_0301200 | 6.230 | 7.129 | 7.153 | 6.017 | 9.184 | mitochondrial large ribosomal subunit, putative                         |
| PVVCY_0600250 | 4.786 | 5.772 | 6.060 | 5.419 | 9.184 | conserved Plasmodium protein, unknown function                          |
| PVVCY_1406640 | 4.288 | 4.395 | 4.197 | 3.595 | 9.187 | conserved Plasmodium protein, unknown function                          |
| PVVCY_0300160 | 5.116 | 5.987 | 6.237 | 5.660 | 9.187 | octaprenyl pyrophosphate synthase, putative                             |
| PVVCY_1001100 | 6.115 | 6.944 | 7.117 | 6.415 | 9.187 | ribosomal protein L35, putative                                         |
| PVVCY_1300630 | 5.569 | 5.733 | 5.565 | 4.951 | 9.189 | adaptor complexes medium subunit family                                 |
| PVVCY_0400890 | 5.876 | 6.796 | 6.856 | 5.768 | 9.189 | 50S ribosomal protein L9, apicoplast, putative                          |
| PVVCY_1204010 | 5.118 | 6.208 | 6.705 | 6.409 | 9.189 | 50S ribosomal protein L12, apicoplast, putative                         |
| PVVCY_0901350 | 6.930 | 7.537 | 7.310 | 5.968 | 9.190 | conserved Plasmodium protein, unknown function                          |
| PVVCY_0801060 | 8.076 | 8.130 | 7.877 | 7.211 | 9.190 | mitochondrial import inner membrane translocase subunit TIM17, putative |
| PVVCY_1301270 | 6.139 | 7.449 | 7.693 | 6.500 | 9.194 | mitochondrial ribosomal protein S14 precursor, putative                 |
| PVVCY_1402170 | 5.132 | 5.972 | 6.000 | 4.933 | 9.194 | mitochondrial ribosomal protein S5 precursor, putative                  |
| PVVCY_1001940 | 6.199 | 6.636 | 6.440 | 5.388 | 9.196 | serine_threonine protein phosphatase 2A activator, putative             |
| PVVCY_1201360 | 5.261 | 6.106 | 6.165 | 5.164 | 9.197 | MO15-related protein kinase, putative                                   |
| PVVCY_1400010 | 1.629 | 2.239 | 2.446 | 2.110 | 9.197 | PIR protein CIR protein                                                 |
| PVVCY_0600480 | 1.594 | 3.287 | 3.952 | 3.226 | 9.197 | targeted glyoxalase II, putative                                        |
| PVVCY_1302040 | 6.761 | 7.673 | 7.707 | 6.546 | 9.201 | methyltransferase, putative                                             |
| PVVCY_1203340 | 9.284 | 9.126 | 8.837 | 8.369 | 9.201 | eukaryotic translation initiation factor 3 subunit B, putative          |
| PVVCY_1405170 | 2.806 | 3.312 | 3.347 | 2.734 | 9.205 | PIH1 domain-containing protein, putative                                |
| PVVCY_0400450 | 7.680 | 8.075 | 8.046 | 7.437 | 9.206 | conserved Plasmodium protein, unknown function                          |
| PVVCY_0801130 | 7.640 | 8.410 | 8.466 | 7.538 | 9.207 | 26S proteasome regulatory subunit RPN8, putative                        |

|               |        |        |        |        |       |                                                              |
|---------------|--------|--------|--------|--------|-------|--------------------------------------------------------------|
| PVVCY_1305480 | 10.174 | 10.383 | 10.159 | 9.341  | 9.207 | elongation factor 1-gamma, putative                          |
| PVVCY_0300230 | 2.366  | 4.316  | 4.840  | 3.403  | 9.208 | conserved Plasmodium protein, unknown function               |
| PVVCY_1004450 | 5.474  | 5.264  | 4.815  | 4.034  | 9.210 | conserved Plasmodium protein, unknown function               |
| PVVCY_1004090 | 6.834  | 7.824  | 7.950  | 6.883  | 9.210 | vacuolar protein sorting-associated protein 29, putative     |
| PVVCY_1306010 | 4.936  | 5.104  | 4.718  | 3.556  | 9.220 | aminomethyltransferase, putative                             |
| PVVCY_1200150 | 5.859  | 6.562  | 6.662  | 5.916  | 9.221 | conserved Plasmodium protein, unknown function               |
| PVVCY_1202450 | 7.532  | 8.122  | 8.003  | 6.889  | 9.221 | gas41 homologue, putative                                    |
| PVVCY_1405830 | 9.677  | 9.563  | 9.282  | 8.768  | 9.223 | rab specific GDP dissociation inhibitor, putative            |
| PVVCY_0802670 | 6.060  | 6.521  | 6.356  | 5.307  | 9.224 | conserved Plasmodium protein, unknown function               |
| PVVCY_1401820 | 6.512  | 7.056  | 7.038  | 6.229  | 9.224 | ferredoxin, putative                                         |
| PVVCY_0100870 | 9.056  | 9.187  | 8.871  | 7.925  | 9.224 | T-complex protein 1 subunit zeta, putative                   |
| PVVCY_1304420 | 6.905  | 7.152  | 6.821  | 5.672  | 9.226 | translation initiation factor eIF-2B subunit gamma, putative |
| PVVCY_0700600 | 5.633  | 5.462  | 5.239  | 4.945  | 9.232 | conserved Plasmodium protein, unknown function               |
| PVVCY_0200520 | 8.969  | 9.682  | 9.692  | 8.686  | 9.237 | proteasome subunit beta type-3, putative                     |
| PVVCY_1103050 | 5.772  | 6.581  | 6.663  | 5.695  | 9.238 | conserved protein, unknown function                          |
| PVVCY_1405540 | 4.499  | 6.125  | 6.773  | 6.010  | 9.238 | conserved Plasmodium protein, unknown function               |
| PVVCY_0600930 | 4.343  | 4.887  | 4.669  | 3.351  | 9.239 | conserved Plasmodium protein, unknown function               |
| PVVCY_1104560 | 4.986  | 5.653  | 5.718  | 4.911  | 9.240 | mitochondrial carrier protein, putative                      |
| PVVCY_1303310 | 5.519  | 6.442  | 6.425  | 5.044  | 9.242 | 1-deoxy-D-xylulose 5-phosphate reductoisomerase, putative    |
| PVVCY_0900570 | 5.319  | 5.716  | 5.484  | 4.334  | 9.243 | exonuclease, putative                                        |
| PVVCY_0400580 | 8.699  | 8.845  | 8.454  | 7.283  | 9.243 | T-complex protein 1 subunit beta, putative                   |
| PVVCY_1104740 | 7.335  | 9.637  | 10.470 | 9.161  | 9.245 | membrane associated histidine-rich protein 1b, putative      |
| PVVCY_1302880 | 12.988 | 12.902 | 12.625 | 12.068 | 9.248 | fam-a protein                                                |
| PVVCY_0201200 | 2.685  | 3.750  | 4.402  | 4.449  | 9.248 | actin-like protein, putative                                 |
| PVVCY_1405380 | 5.522  | 6.664  | 7.038  | 6.284  | 9.250 | SUMO-activating enzyme subunit 2, putative                   |
| PVVCY_1306320 | 11.644 | 11.283 | 10.856 | 10.332 | 9.253 | nucleoside transporter 1, putative                           |
| PVVCY_1305860 | 8.793  | 8.833  | 8.591  | 7.932  | 9.253 | casein kinase II beta chain, putative                        |

|               |        |        |        |        |       |                                                                                    |
|---------------|--------|--------|--------|--------|-------|------------------------------------------------------------------------------------|
| PVVCY_1104730 | 8.618  | 10.731 | 11.501 | 10.284 | 9.254 | membrane associated histidine-rich protein 1a, putative                            |
| PVVCY_0300460 | 7.501  | 7.491  | 7.277  | 6.761  | 9.254 | DNA repair protein RAD2, putative                                                  |
| PVVCY_0300260 | 3.636  | 4.832  | 5.466  | 5.265  | 9.255 | 5'-3' exonuclease, putative                                                        |
| PVVCY_0904040 | 4.355  | 4.581  | 4.251  | 3.088  | 9.262 | conserved Plasmodium protein, unknown function                                     |
| PVVCY_1200500 | 4.707  | 7.055  | 8.048  | 6.992  | 9.267 | CCR4-NOT transcription complex subunit 5, putative                                 |
| PVVCY_1400830 | 4.960  | 6.539  | 7.317  | 6.883  | 9.268 | CCAAT-binding transcription factor, putative                                       |
| PVVCY_1301800 | 6.642  | 7.157  | 6.967  | 5.709  | 9.270 | U1 snRNA associated protein, putative                                              |
| PVVCY_1102580 | 6.487  | 7.713  | 8.173  | 7.468  | 9.270 | conserved Plasmodium protein, unknown function                                     |
| PVVCY_1301220 | 6.258  | 7.249  | 7.533  | 6.741  | 9.272 | heme detoxification protein, putative                                              |
| PVVCY_1405180 | 11.754 | 12.687 | 12.652 | 11.139 | 9.273 | conserved Plasmodium protein, unknown function                                     |
| PVVCY_1102910 | 4.258  | 4.275  | 3.917  | 2.983  | 9.275 | RAP protein, putative                                                              |
| PVVCY_1200840 | 4.311  | 5.140  | 5.225  | 4.173  | 9.275 | conserved Plasmodium protein, unknown function                                     |
| PVVCY_1201060 | 9.439  | 10.134 | 10.166 | 9.181  | 9.276 | proteasome subunit beta type-5, putative                                           |
| PVVCY_0301180 | 8.607  | 8.864  | 8.578  | 7.458  | 9.277 | T-complex protein 1 subunit theta, putative                                        |
| PVVCY_1201480 | 8.497  | 8.356  | 7.810  | 6.641  | 9.279 | heat shock protein 60, putative                                                    |
| PVVCY_1303510 | 5.119  | 5.393  | 5.158  | 4.141  | 9.279 | conserved Plasmodium protein, unknown function                                     |
| PVVCY_1401970 | 5.234  | 6.395  | 6.804  | 6.053  | 9.280 | protein phosphatase PP2A regulatory subunit A, putative                            |
| PVVCY_0900540 | 7.389  | 7.478  | 7.223  | 6.439  | 9.281 | RuvB-like helicase 2, putative                                                     |
| PVVCY_0600380 | 5.309  | 6.546  | 6.754  | 5.369  | 9.281 | conserved Plasmodium protein, unknown function                                     |
| PVVCY_0400530 | 12.124 | 12.276 | 11.891 | 10.678 | 9.282 | glutaredoxin 1, putative                                                           |
| PVVCY_1300590 | 3.886  | 3.893  | 3.581  | 2.773  | 9.284 | delta-aminolevulinic acid dehydratase, putative porphobilinogen synthase, putative |
| PVVCY_1304230 | 3.014  | 4.518  | 5.018  | 3.959  | 9.285 | DEAD box helicase, putative                                                        |
| PVVCY_0802080 | 3.839  | 4.955  | 5.092  | 3.704  | 9.286 | para-aminobenzoic acid synthetase, putative                                        |
| PVVCY_0400850 | 13.206 | 13.015 | 12.598 | 11.826 | 9.286 | 60S acidic ribosomal protein P2, putative                                          |
| PVVCY_0700310 | 6.853  | 7.217  | 7.319  | 7.011  | 9.286 | apicoplast ribosomal protein L21 precursor, putative                               |
| PVVCY_1201310 | 5.138  | 5.680  | 5.661  | 4.769  | 9.287 | translation initiation factor eIF-2B subunit delta, putative                       |
| PVVCY_0902510 | 5.940  | 8.385  | 9.612  | 8.941  | 9.287 | deoxyuridine 5'-triphosphate nucleotidohydrolase, putative                         |

|               |       |        |        |       |       |                                                         |
|---------------|-------|--------|--------|-------|-------|---------------------------------------------------------|
| PVVCY_0701310 | 8.991 | 9.972  | 10.067 | 8.775 | 9.288 | protein kinase c inhibitor-like protein, putative       |
| PVVCY_1000820 | 5.330 | 6.065  | 5.931  | 4.434 | 9.291 | triosephosphate isomerase, putative                     |
| PVVCY_1300920 | 3.391 | 4.921  | 5.496  | 4.574 | 9.291 | gamma-tubulin complex component, putative               |
| PVVCY_0800690 | 4.371 | 5.080  | 5.191  | 4.360 | 9.291 | conserved Plasmodium protein, unknown function          |
| PVVCY_0903400 | 4.268 | 5.192  | 5.222  | 3.846 | 9.291 | conserved Plasmodium protein, unknown function          |
| PVVCY_1400330 | 6.841 | 7.938  | 8.261  | 7.356 | 9.297 | methyltransferase-like protein, putative                |
| PVVCY_0801650 | 9.561 | 10.306 | 10.164 | 8.610 | 9.298 | cytochrome b5, putative                                 |
| PVVCY_1402370 | 5.634 | 6.282  | 6.201  | 4.959 | 9.299 | GTP-binding translation elongation factor, putative     |
| PVVCY_0901080 | 4.390 | 4.849  | 4.652  | 3.413 | 9.300 | ubiquinone biosynthesis protein COQ4, putative          |
| PVVCY_0602250 | 6.216 | 6.287  | 6.195  | 5.843 | 9.302 | conserved Plasmodium protein, unknown function          |
| PVVCY_0500900 | 6.050 | 7.636  | 8.354  | 7.682 | 9.303 | conserved Plasmodium protein, unknown function          |
| PVVCY_1304480 | 3.865 | 4.085  | 3.909  | 3.098 | 9.303 | conserved Plasmodium protein, unknown function          |
| PVVCY_1000550 | 4.229 | 4.366  | 3.891  | 2.432 | 9.304 | conserved Plasmodium protein, unknown function          |
| PVVCY_0802610 | 4.586 | 5.712  | 6.101  | 5.305 | 9.305 | serine_threonine protein phosphatase 4, putative        |
| PVVCY_0902160 | 6.440 | 6.443  | 6.146  | 5.366 | 9.305 | RAP protein, putative                                   |
| PVVCY_1303110 | 5.649 | 5.567  | 5.167  | 4.253 | 9.306 | tRNA 3'-trailer sequence RNase, putative                |
| PVVCY_1403470 | 3.828 | 4.373  | 4.274  | 3.128 | 9.313 | conserved Plasmodium protein, unknown function          |
| PVVCY_1003470 | 4.990 | 5.871  | 6.302  | 5.999 | 9.313 | 30S ribosomal protein S9, putative                      |
| PVVCY_1200160 | 4.205 | 5.118  | 5.382  | 4.586 | 9.316 | conserved Plasmodium protein, unknown function          |
| PVVCY_0100480 | 6.180 | 7.223  | 7.415  | 6.206 | 9.323 | glyoxalase I, putative                                  |
| PVVCY_1103900 | 7.007 | 9.275  | 10.438 | 9.776 | 9.325 | proliferating cell nuclear antigen 1, putative          |
| PVVCY_0800360 | 5.866 | 6.049  | 5.920  | 5.276 | 9.326 | conserved Plasmodium membrane protein, unknown function |
| PVVCY_1004510 | 6.423 | 7.392  | 7.952  | 7.835 | 9.327 | conserved Plasmodium protein, unknown function          |
| PVVCY_0300960 | 8.378 | 8.732  | 8.662  | 7.883 | 9.330 | asparagine--tRNA ligase, putative                       |
| PVVCY_1002010 | 3.060 | 3.951  | 4.255  | 3.576 | 9.335 | rRNA (adenosine-2'-O-)-methyltransferase, putative      |
| PVVCY_1300770 | 6.705 | 8.132  | 8.853  | 8.382 | 9.337 | replication factor A protein 3, putative                |
| PVVCY_0400880 | 3.057 | 3.890  | 4.023  | 2.966 | 9.344 | conserved Plasmodium protein, unknown function          |

|               |       |       |       |       |       |                                                             |
|---------------|-------|-------|-------|-------|-------|-------------------------------------------------------------|
| PVVCY_1102010 | 6.725 | 8.062 | 8.608 | 7.805 | 9.344 | conserved Plasmodium protein, unknown function              |
| PVVCY_0601870 | 6.750 | 7.845 | 8.332 | 7.783 | 9.346 | conserved Plasmodium protein, unknown function              |
| PVVCY_0200580 | 6.071 | 7.622 | 8.353 | 7.681 | 9.346 | conserved Plasmodium protein, unknown function              |
| PVVCY_1102260 | 6.004 | 7.434 | 8.207 | 7.856 | 9.346 | cytochrome b-c1 complex subunit 9, putative                 |
| PVVCY_0901200 | 9.642 | 9.680 | 9.376 | 8.486 | 9.349 | ubiquitin domain-containing protein DSK2, putative          |
| PVVCY_1404640 | 6.620 | 7.548 | 7.873 | 7.157 | 9.352 | conserved Plasmodium protein, unknown function              |
| PVVCY_1300470 | 6.114 | 7.215 | 7.389 | 5.964 | 9.352 | copper transporter, putative                                |
| PVVCY_0400180 | 4.102 | 4.791 | 5.081 | 4.680 | 9.353 | ABC transporter B family member 4, putative                 |
| PVVCY_0100530 | 5.755 | 6.885 | 7.323 | 6.558 | 9.356 | conserved Plasmodium protein, unknown function              |
| PVVCY_0701570 | 6.555 | 7.029 | 7.032 | 6.217 | 9.356 | ubiquitin carboxyl-terminal hydrolase 13, putative          |
| PVVCY_1401630 | 3.764 | 5.282 | 6.290 | 6.406 | 9.360 | ADP-ribosylation factor, putative                           |
| PVVCY_1304260 | 6.348 | 7.464 | 7.751 | 6.584 | 9.362 | dihydrofolate synthase/folypolyglutamate synthase, putative |
| PVVCY_1000990 | 9.067 | 9.768 | 9.799 | 8.647 | 9.366 | proteasome subunit alpha type-3, putative                   |
| PVVCY_1201780 | 5.908 | 6.108 | 6.020 | 5.422 | 9.366 | ATP-dependent RNA helicase DDX42, putative                  |
| PVVCY_1203480 | 5.820 | 6.935 | 7.105 | 5.600 | 9.369 | mitochondrial ribosomal protein L14 precursor, putative     |
| PVVCY_0300940 | 2.964 | 4.751 | 5.715 | 5.218 | 9.369 | UDP-N-acetylglucosamine transferase subunit ALG14, putative |
| PVVCY_1305960 | 7.484 | 7.826 | 7.730 | 6.857 | 9.370 | conserved Plasmodium protein, unknown function              |
| PVVCY_1203100 | 3.125 | 3.693 | 3.872 | 3.362 | 9.370 | GPI-anchored wall transfer protein 1, putative              |
| PVVCY_1401210 | 4.239 | 4.770 | 4.786 | 3.886 | 9.371 | conserved Plasmodium protein, unknown function              |
| PVVCY_0601860 | 6.581 | 7.238 | 7.166 | 5.792 | 9.371 | Ham1-like protein, putative                                 |
| PVVCY_0500810 | 5.365 | 6.190 | 6.374 | 5.414 | 9.372 | HORMA domain protein, putative                              |
| PVVCY_0501430 | 5.407 | 6.183 | 6.210 | 4.890 | 9.375 | RAP protein, putative                                       |
| PVVCY_1104040 | 4.488 | 5.167 | 5.121 | 3.771 | 9.376 | 50S ribosomal protein L9, mitochondrial, putative           |
| PVVCY_1203840 | 5.027 | 5.280 | 5.151 | 4.334 | 9.377 | zinc finger protein, putative                               |
| PVVCY_1305780 | 4.016 | 4.571 | 4.630 | 3.792 | 9.379 | GPI mannosyltransferase 3, putative                         |
| PVVCY_1306120 | 5.361 | 6.125 | 6.258 | 5.247 | 9.381 | rhomboid protease ROM6, putative                            |
| PVVCY_0601820 | 7.901 | 7.748 | 7.416 | 6.760 | 9.381 | ferredoxin reductase-like protein, putative                 |



|               |        |        |        |        |       |                                                                   |
|---------------|--------|--------|--------|--------|-------|-------------------------------------------------------------------|
| PVVCY_1401750 | 7.773  | 8.558  | 8.587  | 7.242  | 9.383 | conserved Plasmodium protein, unknown function                    |
| PVVCY_0600260 | 4.155  | 4.970  | 5.387  | 5.080  | 9.383 | major facilitator superfamily domain-containing protein, putative |
| PVVCY_0601570 | 8.261  | 8.298  | 8.080  | 7.394  | 9.384 | serine--tRNA ligase, putative                                     |
| PVVCY_0801410 | 6.789  | 7.505  | 7.910  | 7.747  | 9.385 | conserved Plasmodium protein, unknown function                    |
| PVVCY_0502390 | 5.571  | 6.045  | 6.157  | 5.608  | 9.385 | serpentine receptor, putative                                     |
| PVVCY_0500270 | 6.092  | 6.189  | 5.977  | 5.199  | 9.387 | tRNA pseudouridine synthase, putative                             |
| PVVCY_1203490 | 11.901 | 11.829 | 11.635 | 11.217 | 9.390 | V-type proton ATPase 16 kDa proteolipid subunit, putative         |
| PVVCY_0700140 | 6.866  | 7.318  | 7.322  | 6.497  | 9.391 | prohibitin, putative                                              |
| PVVCY_0100780 | 5.090  | 5.756  | 5.711  | 4.356  | 9.392 | conserved Plasmodium protein, unknown function                    |
| PVVCY_1201490 | 4.658  | 5.974  | 6.690  | 6.298  | 9.392 | tubulin binding cofactor c, putative                              |
| PVVCY_0902680 | 3.329  | 5.255  | 6.405  | 6.120  | 9.392 | CCR4-NOT transcription complex subunit 2, putative                |
| PVVCY_1202350 | 5.251  | 5.217  | 4.968  | 4.317  | 9.395 | AP-3 complex subunit delta, putative                              |
| PVVCY_0800140 | 5.775  | 5.921  | 5.777  | 5.093  | 9.396 | ubiquitin specific protease, putative                             |
| PVVCY_0904400 | 2.481  | 3.765  | 4.407  | 3.857  | 9.396 | bicoid-interacting protein BIN3, putative                         |
| PVVCY_1302240 | 9.503  | 10.830 | 11.337 | 10.319 | 9.398 | thioredoxin 1, putative                                           |
| PVVCY_1300370 | 6.583  | 7.296  | 7.205  | 5.611  | 9.399 | 50S ribosomal protein L20, putative                               |
| PVVCY_1104340 | 9.032  | 10.098 | 10.401 | 9.276  | 9.401 | nucleoside diphosphate kinase b, putative                         |
| PVVCY_0500530 | 4.692  | 4.674  | 4.436  | 3.782  | 9.403 | conserved Plasmodium protein, unknown function                    |
| PVVCY_1002710 | 7.598  | 8.222  | 8.418  | 7.809  | 9.404 | conserved Plasmodium protein, unknown function                    |
| PVVCY_1204580 | 3.649  | 3.493  | 3.109  | 2.298  | 9.405 | conserved Plasmodium protein, unknown function                    |
| PVVCY_0200060 | 8.262  | 8.851  | 8.759  | 7.384  | 9.406 | fam-a protein                                                     |
| PVVCY_0301610 | 9.716  | 9.900  | 9.839  | 9.312  | 9.410 | small nuclear ribonucleoprotein Sm D2, putative                   |
| PVVCY_1400630 | 5.092  | 5.922  | 6.039  | 4.787  | 9.414 | conserved Plasmodium protein, unknown function                    |
| PVVCY_1202760 | 4.922  | 6.854  | 7.901  | 7.252  | 9.415 | tubulin gamma chain, putative                                     |
| PVVCY_0502150 | 7.852  | 8.134  | 7.699  | 5.878  | 9.420 | conserved Plasmodium protein, unknown function                    |
| PVVCY_1202090 | 5.600  | 6.464  | 6.840  | 6.266  | 9.422 | conserved Plasmodium protein, unknown function                    |
| PVVCY_0300980 | 4.472  | 5.384  | 5.747  | 5.045  | 9.423 | GDP-fructose:GMP antiporter, putative                             |

|               |       |        |        |       |       |                                                          |
|---------------|-------|--------|--------|-------|-------|----------------------------------------------------------|
| PVVCY_0801660 | 7.040 | 7.749  | 7.894  | 6.937 | 9.424 | 50S ribosomal protein L3, apicoplast, putative           |
| PVVCY_1402650 | 8.145 | 8.758  | 8.852  | 7.929 | 9.428 | conserved Plasmodium protein, unknown function           |
| PVVCY_0600920 | 4.745 | 5.222  | 5.178  | 4.109 | 9.430 | general transcription factor 3C polypeptide 5, putative  |
| PVVCY_1001230 | 9.167 | 9.311  | 9.095  | 8.169 | 9.430 | apoptosis-related protein, putative                      |
| PVVCY_0802400 | 8.091 | 8.798  | 9.025  | 8.302 | 9.430 | histone deacetylase 1, putative                          |
| PVVCY_1400510 | 8.465 | 8.336  | 8.088  | 7.602 | 9.438 | DNA-directed RNA polymerase II subunit RPB11, putative   |
| PVVCY_0903310 | 6.318 | 6.685  | 6.679  | 5.926 | 9.440 | conserved Plasmodium protein, unknown function           |
| PVVCY_1004200 | 6.717 | 8.574  | 9.640  | 9.121 | 9.440 | ribonucleotide reductase small subunit, putative         |
| PVVCY_0601760 | 6.255 | 6.798  | 7.001  | 6.516 | 9.447 | conserved Plasmodium protein, unknown function           |
| PVVCY_0900510 | 7.524 | 7.510  | 7.189  | 6.250 | 9.447 | tRNA-splicing ligase RtcB, putative                      |
| PVVCY_1301570 | 5.908 | 5.816  | 5.522  | 4.820 | 9.449 | zinc finger protein, putative                            |
| PVVCY_1400320 | 6.166 | 7.368  | 7.950  | 7.264 | 9.455 | conserved Plasmodium protein, unknown function           |
| PVVCY_0800220 | 5.625 | 6.449  | 6.697  | 5.769 | 9.455 | conserved Plasmodium protein, unknown function           |
| PVVCY_1100560 | 5.481 | 5.369  | 5.136  | 4.659 | 9.458 | trafficking protein particle complex subunit 8, putative |
| PVVCY_1405670 | 6.270 | 6.309  | 6.081  | 5.302 | 9.460 | polyadenylation factor subunit 2, putative               |
| PVVCY_0500940 | 5.720 | 6.360  | 6.447  | 5.397 | 9.460 | conserved Plasmodium protein, unknown function           |
| PVVCY_1401500 | 5.955 | 6.170  | 6.039  | 5.193 | 9.462 | general transcription factor IIH subunit 2, putative     |
| PVVCY_1202400 | 8.466 | 9.127  | 9.213  | 8.104 | 9.465 | proteasome subunit alpha type-6, putative                |
| PVVCY_0101310 | 5.298 | 5.641  | 5.634  | 4.897 | 9.467 | AP-3 complex subunit beta, putative                      |
| PVVCY_1203280 | 3.383 | 3.494  | 3.235  | 2.208 | 9.467 | conserved Plasmodium protein, unknown function           |
| PVVCY_1201720 | 6.704 | 6.833  | 6.690  | 5.983 | 9.467 | mRNA-capping enzyme subunit beta, putative               |
| PVVCY_0400550 | 6.248 | 7.329  | 7.878  | 7.316 | 9.469 | conserved Plasmodium protein, unknown function           |
| PVVCY_1306060 | 4.101 | 5.091  | 5.270  | 3.745 | 9.471 | lipoyl synthase, putative                                |
| PVVCY_1400710 | 7.676 | 7.777  | 7.640  | 7.003 | 9.471 | U1 small nuclear ribonucleoprotein A, putative           |
| PVVCY_0201040 | 7.374 | 7.478  | 7.381  | 6.857 | 9.476 | ubiquitin carboxyl-terminal hydrolase, putative          |
| PVVCY_1304590 | 9.363 | 10.187 | 10.349 | 9.107 | 9.477 | proteasome subunit beta type-7, putative                 |
| PVVCY_0602180 | 3.046 | 4.119  | 4.603  | 3.836 | 9.477 | Rab GTPase activator and protein kinase, putative        |

|               |        |        |        |        |       |                                                                     |
|---------------|--------|--------|--------|--------|-------|---------------------------------------------------------------------|
| PVVCY_0901850 | 6.371  | 6.290  | 6.000  | 5.261  | 9.478 | tRNA nucleotidyltransferase, putative                               |
| PVVCY_0600200 | 6.444  | 7.129  | 7.120  | 5.632  | 9.479 | conserved Plasmodium protein, unknown function                      |
| PVVCY_1102420 | 4.914  | 5.740  | 6.147  | 5.658  | 9.480 | conserved Plasmodium protein, unknown function                      |
| PVVCY_0802550 | 6.004  | 7.240  | 7.881  | 7.254  | 9.480 | conserved Plasmodium protein, unknown function                      |
| PVVCY_0100270 | 5.919  | 6.469  | 6.466  | 5.274  | 9.483 | geranylgeranyltransferase, putative                                 |
| PVVCY_0601900 | 5.535  | 5.849  | 5.810  | 5.012  | 9.483 | conserved Plasmodium protein, unknown function                      |
| PVVCY_1301380 | 7.212  | 7.152  | 6.895  | 6.212  | 9.483 | ubiquitin-protein ligase, putative                                  |
| PVVCY_0101030 | 8.156  | 8.430  | 8.082  | 6.377  | 9.493 | peptidyl-tRNA hydrolase PTRHD1, putative                            |
| PVVCY_1203430 | 5.953  | 6.490  | 6.556  | 5.590  | 9.494 | WD repeat-containing protein 26, putative                           |
| PVVCY_1204560 | 7.691  | 7.656  | 7.371  | 6.539  | 9.494 | phosphoenolpyruvate_phosphate translocator, putative                |
| PVVCY_0700860 | 6.327  | 6.615  | 6.418  | 5.156  | 9.495 | mitochondrial ribosomal protein L4 precursor, putative              |
| PVVCY_0800950 | 5.142  | 5.436  | 5.248  | 4.001  | 9.495 | GTPase Era, putative                                                |
| PVVCY_0802370 | 4.282  | 5.727  | 6.366  | 5.234  | 9.496 | protein phosphatase-beta, putative                                  |
| PVVCY_1203600 | 7.961  | 8.171  | 8.116  | 7.478  | 9.496 | U6 snRNA-associated Sm-like protein LSm2, putative                  |
| PVVCY_1204220 | 6.644  | 7.261  | 7.513  | 6.964  | 9.497 | conserved protein, unknown function                                 |
| PVVCY_1401030 | 1.632  | 2.993  | 3.580  | 2.468  | 9.497 | conserved Plasmodium protein, unknown function                      |
| PVVCY_0701240 | 11.473 | 12.007 | 12.124 | 11.322 | 9.498 | 14-3-3 protein, putative                                            |
| PVVCY_0901970 | 6.176  | 6.721  | 6.801  | 5.856  | 9.499 | protein GCN20, putative ABC transporter F family member 2, putative |
| PVVCY_1306330 | 6.450  | 7.014  | 7.142  | 6.304  | 9.500 | conserved Plasmodium protein, unknown function                      |
| PVVCY_1403510 | 6.040  | 6.222  | 5.976  | 4.780  | 9.500 | GTP-binding protein, putative                                       |
| PVVCY_1401180 | 4.980  | 5.813  | 6.015  | 4.817  | 9.504 | conserved Plasmodium protein, unknown function                      |
| PVVCY_1305540 | 5.760  | 6.129  | 5.979  | 4.670  | 9.504 | serine threonine protein kinase, putative                           |
| PVVCY_0701320 | 4.923  | 5.380  | 5.404  | 4.462  | 9.505 | phosphatase, putative                                               |
| PVVCY_1103180 | 5.418  | 6.276  | 6.444  | 5.053  | 9.511 | conserved Plasmodium protein, unknown function                      |
| PVVCY_1004500 | 7.303  | 7.968  | 8.197  | 7.437  | 9.512 | 26S proteasome regulatory subunit RPN6, putative                    |
| PVVCY_1204260 | 10.720 | 10.815 | 10.488 | 9.207  | 9.514 | ubiquitin-conjugating enzyme E2 N, putative                         |
| PVVCY_1306880 | 12.156 | 12.207 | 11.975 | 11.091 | 9.523 | fam-a protein                                                       |

|               |       |        |        |        |       |                                                             |
|---------------|-------|--------|--------|--------|-------|-------------------------------------------------------------|
| PVVCY_0702110 | 2.760 | 4.037  | 4.738  | 4.115  | 9.523 | conserved Plasmodium protein, unknown function              |
| PVVCY_0400840 | 7.625 | 8.548  | 8.774  | 7.393  | 9.523 | asparagine synthetase [glutamine-hydrolyzing], putative     |
| PVVCY_1305630 | 3.045 | 4.307  | 4.964  | 4.210  | 9.529 | ABC transporter B family member 5, putative                 |
| PVVCY_0903600 | 6.241 | 7.341  | 7.930  | 7.329  | 9.530 | apicoplast ribosomal protein S14p/S29e precursor, putative  |
| PVVCY_0201110 | 5.005 | 5.564  | 5.591  | 4.375  | 9.531 | DNA (cytosine-5)-methyltransferase, putative                |
| PVVCY_1100950 | 7.458 | 7.654  | 7.575  | 6.849  | 9.536 | SNAP protein, putative                                      |
| PVVCY_1305580 | 7.470 | 8.309  | 8.798  | 8.455  | 9.539 | conserved Plasmodium protein, unknown function              |
| PVVCY_0903930 | 4.020 | 4.632  | 4.787  | 3.857  | 9.539 | conserved Plasmodium protein, unknown function              |
| PVVCY_1402930 | 6.227 | 7.248  | 7.768  | 7.096  | 9.541 | apicoplast ribosomal protein L33 precursor, putative        |
| PVVCY_1103160 | 9.340 | 9.971  | 10.068 | 8.882  | 9.549 | proteasome subunit alpha type-7, putative                   |
| PVVCY_1305460 | 8.260 | 9.014  | 9.225  | 8.136  | 9.549 | 26S proteasome regulatory subunit RPN3, putative            |
| PVVCY_1401760 | 5.785 | 6.060  | 6.006  | 5.163  | 9.551 | conserved Plasmodium protein, unknown function              |
| PVVCY_1100840 | 7.708 | 7.908  | 7.801  | 6.950  | 9.553 | conserved Plasmodium protein, unknown function              |
| PVVCY_1201910 | 9.083 | 9.304  | 9.098  | 7.860  | 9.554 | T-complex protein 1 subunit epsilon, putative               |
| PVVCY_1405730 | 5.840 | 7.652  | 8.733  | 8.040  | 9.555 | replication factor C subunit 4, putative                    |
| PVVCY_0801380 | 9.646 | 9.418  | 9.082  | 8.487  | 9.556 | 6-phosphofructokinase, putative                             |
| PVVCY_0500760 | 7.855 | 8.808  | 9.267  | 8.526  | 9.556 | CDGSH iron-sulfur domain-containing protein, putative       |
| PVVCY_0300130 | 2.279 | 3.208  | 3.660  | 2.953  | 9.557 | PIR protein CIR protein                                     |
| PVVCY_1004520 | 5.681 | 5.924  | 5.859  | 5.046  | 9.557 | conserved Plasmodium protein, unknown function              |
| PVVCY_1202750 | 9.300 | 10.108 | 10.344 | 9.183  | 9.559 | proteasome subunit beta type-4, putative                    |
| PVVCY_0800380 | 6.289 | 7.049  | 7.207  | 5.900  | 9.559 | conserved Plasmodium protein, unknown function              |
| PVVCY_0301000 | 5.913 | 6.800  | 7.031  | 5.653  | 9.563 | mitochondrial ribosomal protein L12 precursor, putative     |
| PVVCY_1301050 | 3.426 | 4.639  | 5.515  | 5.562  | 9.563 | conserved Plasmodium protein, unknown function              |
| PVVCY_0802620 | 6.674 | 7.742  | 8.335  | 7.757  | 9.565 | cytochrome c oxidase subunit 5B, putative                   |
| PVVCY_0902140 | 9.597 | 9.317  | 8.972  | 8.462  | 9.570 | translation elongation factor EF-1, subunit alpha, putative |
| PVVCY_1305190 | 9.408 | 10.542 | 11.190 | 10.622 | 9.570 | MSP7-like protein                                           |
| PVVCY_1000490 | 7.531 | 7.951  | 7.973  | 7.002  | 9.571 | importin-7, putative                                        |

|               |       |       |        |       |       |                                                                         |
|---------------|-------|-------|--------|-------|-------|-------------------------------------------------------------------------|
| PVVCY_1406170 | 5.772 | 5.650 | 5.314  | 4.445 | 9.571 | conserved Plasmodium protein, unknown function                          |
| PVVCY_0200920 | 4.745 | 5.247 | 5.329  | 4.349 | 9.575 | L-seryl-tRNA(Sec) kinase, putative                                      |
| PVVCY_1405280 | 7.841 | 8.113 | 8.074  | 7.249 | 9.576 | clustered-asparagine-rich protein, putative                             |
| PVVCY_0300620 | 3.859 | 5.491 | 6.413  | 5.529 | 9.581 | conserved Plasmodium protein, unknown function                          |
| PVVCY_1101040 | 4.283 | 5.975 | 6.957  | 6.131 | 9.581 | conserved Plasmodium protein, unknown function                          |
| PVVCY_1406330 | 6.389 | 6.668 | 6.605  | 5.669 | 9.584 | conserved Plasmodium protein, unknown function                          |
| PVVCY_1301420 | 5.408 | 6.529 | 6.910  | 5.394 | 9.585 | conserved Plasmodium protein, unknown function                          |
| PVVCY_0300400 | 5.961 | 6.008 | 5.843  | 5.132 | 9.586 | PCI domain-containing protein, putative                                 |
| PVVCY_1404980 | 6.297 | 6.730 | 6.705  | 5.500 | 9.589 | elongation factor G, putative                                           |
| PVVCY_0101300 | 7.502 | 8.289 | 8.605  | 7.703 | 9.589 | apicoplast ribosomal protein L18 precursor, putative                    |
| PVVCY_1406630 | 6.901 | 7.869 | 8.200  | 6.881 | 9.590 | thymidylate kinase, putative                                            |
| PVVCY_1204270 | 5.599 | 6.884 | 7.608  | 6.881 | 9.590 | ubiquitin carboxyl-terminal hydrolase 14, putative                      |
| PVVCY_1100220 | 8.907 | 9.712 | 10.085 | 9.336 | 9.591 | skeleton-binding protein 1, putative                                    |
| PVVCY_1300530 | 6.976 | 7.903 | 8.438  | 7.954 | 9.591 | conserved Plasmodium protein, unknown function                          |
| PVVCY_1003260 | 3.710 | 5.615 | 6.919  | 6.664 | 9.593 | conserved Plasmodium protein, unknown function                          |
| PVVCY_0600740 | 8.035 | 8.474 | 8.506  | 7.478 | 9.595 | mitochondrial import inner membrane translocase subunit TIM10, putative |
| PVVCY_1301990 | 9.018 | 9.626 | 9.637  | 8.090 | 9.595 | 6-phosphogluconate dehydrogenase, decarboxylating, putative             |
| PVVCY_0500890 | 6.034 | 6.704 | 6.945  | 6.051 | 9.601 | RNA-binding protein, putative                                           |
| PVVCY_1404330 | 4.125 | 4.786 | 5.101  | 4.496 | 9.603 | conserved Plasmodium protein, unknown function                          |
| PVVCY_1101700 | 4.446 | 5.445 | 5.987  | 5.315 | 9.604 | conserved protein, unknown function                                     |
| PVVCY_0502140 | 6.445 | 6.523 | 6.327  | 5.402 | 9.604 | GDP dissociation inhibitor, putative                                    |
| PVVCY_1402040 | 7.855 | 8.402 | 8.704  | 8.353 | 9.607 | ras-related protein Rab-11A, putative                                   |
| PVVCY_0600640 | 5.849 | 6.325 | 6.455  | 5.660 | 9.609 | RNA-binding protein, putative                                           |
| PVVCY_0803100 | 5.572 | 6.187 | 6.526  | 6.125 | 9.610 | apicoplast ribosomal protein S6, putative                               |
| PVVCY_0300900 | 6.393 | 7.211 | 7.701  | 7.306 | 9.611 | ras-related protein Rab-5A, putative                                    |
| PVVCY_0500260 | 7.715 | 8.292 | 8.451  | 7.482 | 9.612 | 26S proteasome regulatory subunit p55, putative                         |
| PVVCY_0401840 | 7.033 | 6.933 | 6.702  | 6.115 | 9.614 | AP-4 complex subunit epsilon, putative                                  |

|               |       |       |       |       |       |                                                                |
|---------------|-------|-------|-------|-------|-------|----------------------------------------------------------------|
| PVVCY_1103810 | 7.819 | 8.227 | 8.267 | 7.302 | 9.618 | falcilysin, putative                                           |
| PVVCY_1101290 | 3.584 | 4.810 | 5.384 | 4.175 | 9.619 | conserved Plasmodium protein, unknown function                 |
| PVVCY_1404890 | 8.059 | 8.241 | 8.108 | 7.108 | 9.620 | 60 kDa chaperonin, putative                                    |
| PVVCY_0101100 | 5.878 | 7.294 | 8.141 | 7.427 | 9.621 | conserved Plasmodium protein, unknown function                 |
| PVVCY_1104020 | 4.888 | 4.995 | 4.919 | 4.335 | 9.624 | conserved Plasmodium protein, unknown function                 |
| PVVCY_1404290 | 5.313 | 5.691 | 5.825 | 5.281 | 9.624 | conserved Plasmodium protein, unknown function                 |
| PVVCY_1100490 | 5.725 | 6.050 | 6.011 | 4.959 | 9.626 | ATP-dependent helicase, putative                               |
| PVVCY_1303350 | 5.863 | 6.277 | 6.202 | 4.771 | 9.626 | conserved Plasmodium protein, unknown function                 |
| PVVCY_1002700 | 6.219 | 6.833 | 7.059 | 6.209 | 9.627 | conserved Plasmodium protein, unknown function                 |
| PVVCY_0500420 | 4.258 | 5.395 | 5.969 | 4.980 | 9.627 | conserved Plasmodium protein, unknown function                 |
| PVVCY_0400020 | 1.327 | 1.968 | 2.312 | 1.830 | 9.627 | CIR protein PIR protein                                        |
| PVVCY_0501320 | 8.140 | 8.897 | 9.294 | 8.687 | 9.633 | conserved Plasmodium protein, unknown function                 |
| PVVCY_1001070 | 6.914 | 7.253 | 7.383 | 6.931 | 9.633 | ATP-dependent protease ATPase subunit ClpY, putative           |
| PVVCY_1302470 | 7.027 | 7.040 | 6.937 | 6.504 | 9.638 | conserved Plasmodium protein, unknown function                 |
| PVVCY_1405310 | 2.379 | 3.697 | 4.572 | 4.192 | 9.639 | conserved Plasmodium protein, unknown function                 |
| PVVCY_1301020 | 3.862 | 4.839 | 5.327 | 4.419 | 9.644 | shikimate dehydrogenase, putative                              |
| PVVCY_1003590 | 4.795 | 6.348 | 7.333 | 6.697 | 9.646 | conserved Plasmodium protein, unknown function                 |
| PVVCY_1305040 | 7.584 | 7.244 | 6.839 | 6.245 | 9.647 | isoleucine--tRNA ligase, putative                              |
| PVVCY_1103740 | 6.203 | 7.830 | 8.787 | 7.820 | 9.647 | conserved Plasmodium protein, unknown function                 |
| PVVCY_0400700 | 5.125 | 6.437 | 7.145 | 6.123 | 9.647 | DNA polymerase delta small subunit, putative                   |
| PVVCY_1404280 | 8.025 | 8.194 | 8.105 | 7.271 | 9.652 | ubiquitin-activating enzyme E1, putative                       |
| PVVCY_0400350 | 4.423 | 4.965 | 5.155 | 4.326 | 9.652 | conserved Plasmodium protein, unknown function                 |
| PVVCY_0201150 | 4.002 | 4.596 | 4.811 | 3.927 | 9.653 | conserved Plasmodium protein, unknown function                 |
| PVVCY_0500210 | 5.049 | 5.880 | 6.324 | 5.648 | 9.653 | phosphomannomutase, putative                                   |
| PVVCY_1201540 | 7.136 | 6.995 | 6.813 | 6.514 | 9.653 | Rab3 GTPase-activating protein non-catalytic subunit, putative |
| PVVCY_0900930 | 7.209 | 7.861 | 8.073 | 7.004 | 9.656 | mitochondrial ribosomal protein L11 precursor, putative        |
| PVVCY_1001800 | 4.689 | 6.132 | 7.059 | 6.473 | 9.659 | succinyl-CoA ligase [ADP-forming] subunit beta, putative       |

|               |       |        |        |        |       |                                                              |
|---------------|-------|--------|--------|--------|-------|--------------------------------------------------------------|
| PVVCY_0901650 | 7.099 | 7.087  | 6.822  | 5.810  | 9.660 | insulinase, putative                                         |
| PVVCY_1203400 | 8.987 | 9.569  | 9.746  | 8.729  | 9.661 | proteasome subunit beta type-1, putative                     |
| PVVCY_0301560 | 5.420 | 6.952  | 8.016  | 7.698  | 9.662 | replication factor C subunit 2, putative                     |
| PVVCY_0900300 | 6.068 | 6.453  | 6.465  | 5.365  | 9.667 | actin-like protein, putative                                 |
| PVVCY_1001550 | 9.054 | 10.012 | 10.580 | 9.987  | 9.667 | calmodulin, putative                                         |
| PVVCY_0700210 | 5.344 | 5.700  | 5.731  | 4.787  | 9.668 | translation initiation factor eIF-2B subunit alpha, putative |
| PVVCY_0802220 | 7.567 | 7.752  | 7.691  | 6.889  | 9.674 | thioredoxin reductase, putative                              |
| PVVCY_1103470 | 6.122 | 6.074  | 5.795  | 4.813  | 9.675 | glutamate-tRNA ligase, putative                              |
| PVVCY_1401230 | 3.072 | 3.516  | 3.714  | 3.156  | 9.681 | conserved Plasmodium protein, unknown function               |
| PVVCY_1001740 | 3.307 | 3.447  | 3.375  | 2.648  | 9.683 | conserved Plasmodium protein, unknown function               |
| PVVCY_1305590 | 7.267 | 7.922  | 8.131  | 6.954  | 9.685 | mitochondrial ribosomal protein L49 precursor, putative      |
| PVVCY_1406220 | 6.578 | 6.582  | 6.374  | 5.511  | 9.686 | conserved Plasmodium protein, unknown function               |
| PVVCY_1202380 | 7.767 | 8.200  | 8.421  | 7.978  | 9.689 | 26S proteasome regulatory subunit RPN10, putative            |
| PVVCY_1402890 | 5.836 | 6.673  | 7.058  | 6.011  | 9.694 | protein phosphatase PPM7, putative                           |
| PVVCY_0401280 | 7.099 | 7.725  | 8.002  | 7.171  | 9.697 | co-chaperone p23, putative                                   |
| PVVCY_0600720 | 2.579 | 4.051  | 4.926  | 3.890  | 9.700 | amino acid transporter, putative                             |
| PVVCY_0801490 | 4.711 | 5.693  | 6.223  | 5.304  | 9.700 | ubiquitin fusion degradation protein 1, putative             |
| PVVCY_1305950 | 5.584 | 5.668  | 5.505  | 4.552  | 9.700 | DNA repair protein RAD5, putative                            |
| PVVCY_1306840 | 6.407 | 6.806  | 6.832  | 5.666  | 9.701 | vacuolar fusion protein MON1, putative                       |
| PVVCY_0800500 | 5.376 | 5.636  | 5.653  | 4.884  | 9.704 | methyltransferase, putative                                  |
| PVVCY_0901130 | 1.319 | 1.776  | 2.067  | 1.824  | 9.705 | conserved Plasmodium protein, unknown function               |
| PVVCY_1001890 | 2.455 | 3.829  | 4.698  | 3.928  | 9.712 | exodeoxyribonuclease III, putative                           |
| PVVCY_0901210 | 5.072 | 5.472  | 5.562  | 4.639  | 9.714 | GTP-binding protein, putative                                |
| PVVCY_0600710 | 7.685 | 7.843  | 7.820  | 7.205  | 9.718 | mitochondrial ACP precursor, putative                        |
| PVVCY_0904700 | 2.129 | 2.946  | 3.473  | 3.047  | 9.719 | CIR protein PIR protein                                      |
| PVVCY_0901300 | 5.087 | 5.545  | 5.657  | 4.621  | 9.721 | conserved Plasmodium protein, unknown function               |
| PVVCY_1100400 | 9.067 | 11.288 | 12.790 | 11.908 | 9.722 | actin-depolymerizing factor 1, putative                      |

|               |        |        |        |        |       |                                                                 |
|---------------|--------|--------|--------|--------|-------|-----------------------------------------------------------------|
| PVVCY_1402800 | 7.936  | 8.348  | 8.456  | 7.548  | 9.726 | conserved protein, unknown function                             |
| PVVCY_1001880 | 6.397  | 6.618  | 6.601  | 5.782  | 9.729 | NADP-specific glutamate dehydrogenase, putative                 |
| PVVCY_0500630 | 7.008  | 7.048  | 6.988  | 6.597  | 9.730 | deoxyribose-phosphate aldolase, putative                        |
| PVVCY_1403790 | 4.810  | 5.895  | 6.639  | 6.231  | 9.731 | conserved Plasmodium protein, unknown function                  |
| PVVCY_1103530 | 9.251  | 9.527  | 9.484  | 8.362  | 9.731 | T-complex protein 1 subunit delta, putative                     |
| PVVCY_1405230 | 6.683  | 9.040  | 10.630 | 9.622  | 9.732 | serine hydroxymethyltransferase, putative                       |
| PVVCY_0600170 | 4.335  | 4.420  | 4.356  | 3.786  | 9.735 | trimethylguanosine synthase, putative                           |
| PVVCY_1200360 | 2.808  | 4.058  | 4.913  | 4.409  | 9.738 | conserved Plasmodium protein, unknown function                  |
| PVVCY_1306380 | 4.529  | 4.871  | 4.877  | 3.732  | 9.738 | conserved Plasmodium protein, unknown function                  |
| PVVCY_0900550 | 5.947  | 6.668  | 7.136  | 6.725  | 9.741 | apicoplast ribosomal protein S15 precursor, putative            |
| PVVCY_1304870 | 2.756  | 3.680  | 4.242  | 3.550  | 9.741 | DNA polymerase theta, putative                                  |
| PVVCY_1403750 | 2.385  | 3.276  | 3.906  | 3.636  | 9.742 | conserved Plasmodium protein, unknown function                  |
| PVVCY_0401060 | 5.116  | 6.432  | 7.402  | 7.169  | 9.742 | conserved protein, unknown function                             |
| PVVCY_1002150 | 3.623  | 4.697  | 5.432  | 4.990  | 9.743 | conserved Plasmodium protein, unknown function                  |
| PVVCY_1004530 | 5.485  | 6.333  | 6.805  | 5.970  | 9.743 | conserved Plasmodium protein, unknown function                  |
| PVVCY_1200740 | 8.840  | 9.529  | 9.870  | 8.999  | 9.745 | 26S protease regulatory subunit 4, putative                     |
| PVVCY_1003410 | 6.991  | 7.912  | 8.507  | 7.967  | 9.745 | 26S proteasome regulatory subunit RPN13, putative               |
| PVVCY_0700270 | 10.721 | 11.008 | 11.064 | 10.318 | 9.745 | protein disulfide isomerase                                     |
| PVVCY_0201120 | 8.695  | 9.322  | 9.533  | 8.291  | 9.746 | proteasome subunit alpha type-5, putative                       |
| PVVCY_1303540 | 5.739  | 6.256  | 6.427  | 5.386  | 9.748 | mediator of RNA polymerase II transcription subunit 6, putative |
| PVVCY_1305830 | 4.905  | 6.015  | 6.777  | 6.308  | 9.753 | aconitate hydratase, putative                                   |
| PVVCY_0600280 | 6.476  | 6.641  | 6.604  | 5.850  | 9.754 | cytochrome c1 heme lyase, putative                              |
| PVVCY_0201050 | 3.889  | 4.974  | 5.738  | 5.358  | 9.755 | conserved Plasmodium protein, unknown function                  |
| PVVCY_1202500 | 5.109  | 5.403  | 5.376  | 4.205  | 9.756 | kinesin-like protein, putative                                  |
| PVVCY_1201460 | 4.872  | 5.743  | 6.225  | 5.313  | 9.758 | conserved Plasmodium protein, unknown function                  |
| PVVCY_1100820 | 7.420  | 7.628  | 7.570  | 6.559  | 9.758 | nuclear protein localization protein 4, putative                |
| PVVCY_0903090 | 8.889  | 9.064  | 8.947  | 7.780  | 9.759 | T-complex protein 1 subunit alpha, putative                     |



|               |        |        |        |        |       |                                                          |
|---------------|--------|--------|--------|--------|-------|----------------------------------------------------------|
| PVVCY_0801020 | 2.906  | 4.304  | 5.381  | 5.305  | 9.759 | ribonuclease H2 subunit B, putative                      |
| PVVCY_0903340 | 7.352  | 7.520  | 7.553  | 7.095  | 9.761 | coatomer subunit delta, putative                         |
| PVVCY_1201150 | 7.581  | 8.413  | 8.966  | 8.511  | 9.761 | cytochrome b-c1 complex subunit 7, putative              |
| PVVCY_1405940 | 6.032  | 5.781  | 5.349  | 4.269  | 9.761 | glucose inhibited division protein a homologue, putative |
| PVVCY_0901530 | 2.857  | 3.901  | 4.524  | 3.625  | 9.761 | conserved Plasmodium membrane protein, unknown function  |
| PVVCY_0601920 | 6.725  | 7.751  | 8.453  | 7.978  | 9.762 | conserved Plasmodium protein, unknown function           |
| PVVCY_0902300 | 5.190  | 6.329  | 7.151  | 6.828  | 9.762 | conserved Plasmodium protein, unknown function           |
| PVVCY_0401400 | 9.028  | 8.972  | 8.841  | 8.435  | 9.763 | eukaryotic translation initiation factor 4E, putative    |
| PVVCY_0201160 | 6.301  | 6.557  | 6.609  | 5.915  | 9.764 | cation transporting ATPase, putative                     |
| PVVCY_1401150 | 4.421  | 5.694  | 6.590  | 6.115  | 9.765 | ATP synthase subunit gamma, mitochondrial, putative      |
| PVVCY_1404420 | 3.195  | 3.951  | 4.465  | 4.093  | 9.766 | conserved Plasmodium protein, unknown function           |
| PVVCY_0201090 | 4.773  | 5.309  | 5.604  | 5.014  | 9.767 | conserved Plasmodium protein, unknown function           |
| PVVCY_0901600 | 11.384 | 11.470 | 11.407 | 10.796 | 9.771 | GTP-binding nuclear protein RAN/TC4, putative            |
| PVVCY_0401930 | 8.004  | 8.587  | 8.977  | 8.655  | 9.772 | ras-related protein RAB7, putative                       |
| PVVCY_0602050 | 8.918  | 9.724  | 10.165 | 9.244  | 9.775 | conserved Plasmodium protein, unknown function           |
| PVVCY_1202960 | 7.081  | 8.342  | 9.094  | 7.935  | 9.777 | conserved Plasmodium protein, unknown function           |
| PVVCY_1302110 | 3.968  | 5.169  | 6.000  | 5.441  | 9.777 | polyprenol reductase, putative                           |
| PVVCY_1004340 | 7.438  | 7.907  | 8.181  | 7.725  | 9.783 | cytochrome c, putative                                   |
| PVVCY_1401370 | 5.326  | 5.844  | 6.013  | 4.858  | 9.785 | mitochondrial ribosomal protein S35 precursor, putative  |
| PVVCY_0100890 | 5.948  | 5.869  | 5.687  | 5.113  | 9.791 | conserved Plasmodium protein, unknown function           |
| PVVCY_1305510 | 6.008  | 6.545  | 6.802  | 5.970  | 9.796 | conserved Plasmodium protein, unknown function           |
| PVVCY_1001980 | 6.883  | 7.576  | 7.919  | 6.909  | 9.796 | mitochondrial ribosomal protein L15 precursor, putative  |
| PVVCY_1202550 | 5.289  | 5.792  | 6.094  | 5.608  | 9.799 | conserved Plasmodium protein, unknown function           |
| PVVCY_0100260 | 5.578  | 6.060  | 6.184  | 4.904  | 9.801 | elongation factor G, putative                            |
| PVVCY_1306260 | 3.494  | 4.793  | 5.625  | 4.623  | 9.801 | conserved Plasmodium protein, unknown function           |
| PVVCY_0801770 | 5.203  | 6.802  | 7.892  | 6.986  | 9.802 | protein disulfide isomerase, putative                    |
| PVVCY_0902640 | 8.283  | 8.316  | 8.249  | 7.789  | 9.806 | multiprotein-bridging factor 1, putative                 |

|               |       |       |       |       |       |                                                                        |
|---------------|-------|-------|-------|-------|-------|------------------------------------------------------------------------|
| PVVCY_1004310 | 5.489 | 5.936 | 6.113 | 5.216 | 9.806 | mitochondrial ribosomal protein L16 precursor, putative                |
| PVVCY_0904000 | 3.522 | 5.130 | 6.357 | 6.072 | 9.806 | dolichol-phosphate mannosyltransferase, putative                       |
| PVVCY_0801870 | 1.980 | 3.047 | 3.723 | 2.843 | 9.807 | conserved Plasmodium protein, unknown function                         |
| PVVCY_1403570 | 5.306 | 5.520 | 5.584 | 5.050 | 9.807 | PPPDE peptidase domain-containing protein, putative                    |
| PVVCY_1200920 | 7.188 | 7.379 | 7.402 | 6.760 | 9.808 | ribosomal protein L43, mitochondrial, putative                         |
| PVVCY_0902790 | 8.120 | 8.653 | 8.941 | 8.153 | 9.808 | 26S proteasome regulatory subunit RPN7, putative                       |
| PVVCY_0802850 | 6.269 | 6.603 | 6.644 | 5.515 | 9.809 | conserved Plasmodium protein, unknown function                         |
| PVVCY_1301010 | 3.607 | 4.274 | 4.631 | 3.624 | 9.810 | GCN2 alpha-related protein kinase, putative                            |
| PVVCY_0903280 | 6.208 | 6.940 | 7.437 | 6.885 | 9.813 | protein disulfide isomerase related protein, putative                  |
| PVVCY_0100840 | 6.124 | 6.877 | 7.374 | 6.827 | 9.815 | conserved Plasmodium protein, unknown function                         |
| PVVCY_1203470 | 4.671 | 5.828 | 6.506 | 5.247 | 9.815 | histone RNA hairpin-binding protein, putative                          |
| PVVCY_1204190 | 3.203 | 4.463 | 5.456 | 5.261 | 9.816 | conserved Plasmodium protein, unknown function                         |
| PVVCY_1406390 | 8.277 | 8.889 | 9.240 | 8.521 | 9.818 | 26S protease regulatory subunit 8, putative                            |
| PVVCY_1104630 | 3.723 | 3.918 | 4.003 | 3.584 | 9.819 | conserved Plasmodium protein, unknown function                         |
| PVVCY_1104390 | 8.622 | 9.185 | 9.513 | 8.782 | 9.819 | suppressor of kinetochore protein 1, putative                          |
| PVVCY_0701390 | 7.004 | 7.240 | 7.179 | 5.901 | 9.820 | trafficking protein particle complex subunit 2- like protein, putative |
| PVVCY_1406300 | 3.216 | 3.824 | 4.275 | 4.083 | 9.821 | conserved Plasmodium protein, unknown function                         |
| PVVCY_1001310 | 7.928 | 8.059 | 8.095 | 7.697 | 9.824 | exportin-7, putative                                                   |
| PVVCY_1200540 | 4.677 | 4.763 | 4.631 | 3.596 | 9.824 | conserved Plasmodium protein, unknown function                         |
| PVVCY_1100410 | 5.793 | 6.129 | 6.363 | 6.177 | 9.824 | protein kinase, putative                                               |
| PVVCY_0903960 | 5.657 | 6.932 | 7.805 | 7.008 | 9.825 | conserved Plasmodium protein, unknown function                         |
| PVVCY_1104570 | 3.238 | 4.258 | 4.944 | 4.096 | 9.826 | DNA repair endonuclease, putative                                      |
| PVVCY_1003320 | 8.657 | 8.902 | 8.944 | 8.139 | 9.827 | small nuclear ribonucleoprotein-associated protein B, putative         |
| PVVCY_1403160 | 8.385 | 8.314 | 8.111 | 7.302 | 9.828 | proline--tRNA ligase, putative                                         |
| PVVCY_1101560 | 4.713 | 4.784 | 4.661 | 3.719 | 9.833 | rhomboid protease ROM9, putative                                       |
| PVVCY_1306130 | 6.676 | 7.894 | 8.792 | 8.190 | 9.834 | conserved Plasmodium protein, unknown function                         |
| PVVCY_1301830 | 6.548 | 6.493 | 6.388 | 6.076 | 9.834 | conserved Plasmodium protein, unknown function                         |

|               |       |       |        |        |       |                                                                                                        |
|---------------|-------|-------|--------|--------|-------|--------------------------------------------------------------------------------------------------------|
| PVVCY_0200800 | 8.238 | 9.000 | 9.454  | 8.600  | 9.834 | conserved Plasmodium protein, unknown function                                                         |
| PVVCY_1002640 | 8.354 | 8.854 | 8.977  | 7.322  | 9.834 | cytochrome c oxidase assembly protein COX14, putative                                                  |
| PVVCY_0902480 | 3.358 | 4.006 | 4.426  | 3.872  | 9.834 | RNA-binding protein, putative                                                                          |
| PVVCY_1202720 | 5.969 | 6.630 | 7.012  | 6.207  | 9.835 | methionine aminopeptidase 1c, putative                                                                 |
| PVVCY_0701540 | 8.548 | 9.247 | 9.674  | 8.935  | 9.835 | 26S protease regulatory subunit 6B, putative                                                           |
| PVVCY_1004250 | 5.760 | 5.808 | 5.768  | 5.356  | 9.835 | GTPase-activating protein, putative                                                                    |
| PVVCY_0701520 | 5.435 | 6.656 | 7.562  | 6.974  | 9.838 | conserved Plasmodium protein, unknown function                                                         |
| PVVCY_0801740 | 7.272 | 7.953 | 8.461  | 8.148  | 9.838 | DNAJ-like molecular chaperone protein, putative                                                        |
| PVVCY_1101770 | 5.823 | 6.819 | 7.611  | 7.439  | 9.839 | conserved Plasmodium protein, unknown function                                                         |
| PVVCY_1301700 | 7.866 | 8.031 | 8.090  | 7.638  | 9.842 | calcineurin subunit B, putative                                                                        |
| PVVCY_0100740 | 4.297 | 5.064 | 5.535  | 4.581  | 9.842 | para-hydroxybenzoate--polyprenyltransferase, putative                                                  |
| PVVCY_0501820 | 6.946 | 7.783 | 8.234  | 7.013  | 9.843 | ubiquitin-conjugating enzyme, putative                                                                 |
| PVVCY_1401330 | 4.290 | 6.188 | 7.639  | 6.936  | 9.843 | 2-oxoisovalerate dehydrogenase subunit alpha, mitochondrial, putative                                  |
| PVVCY_1203800 | 7.347 | 8.157 | 8.636  | 7.672  | 9.843 | 50S ribosomal protein L17, apicoplast, putative                                                        |
| PVVCY_0600470 | 7.606 | 9.440 | 10.850 | 10.217 | 9.844 | conserved Plasmodium protein, unknown function                                                         |
| PVVCY_0400290 | 4.323 | 6.001 | 7.287  | 6.869  | 9.844 | lipoamide acyltransferase component of branched- chain alpha-keto acid dehydrogenase complex, putative |
| PVVCY_0901430 | 4.213 | 4.749 | 5.164  | 4.994  | 9.848 | serine esterase, putative                                                                              |
| PVVCY_1204420 | 7.060 | 7.311 | 7.363  | 6.434  | 9.848 | peptidyl-prolyl cis-trans isomerase, putative                                                          |
| PVVCY_1405240 | 6.080 | 7.669 | 8.823  | 7.850  | 9.849 | ATP synthase subunit beta, mitochondrial, putative                                                     |
| PVVCY_1103910 | 6.783 | 7.771 | 8.528  | 8.134  | 9.855 | conserved Plasmodium protein, unknown function                                                         |
| PVVCY_0301300 | 6.176 | 6.548 | 6.748  | 6.087  | 9.856 | conserved Plasmodium protein, unknown function                                                         |
| PVVCY_1400660 | 8.378 | 8.988 | 9.365  | 8.574  | 9.856 | 26S protease regulatory subunit 10B, putative                                                          |
| PVVCY_1104500 | 8.104 | 8.607 | 8.857  | 7.839  | 9.857 | 26S proteasome regulatory subunit RPN11, putative                                                      |
| PVVCY_1104750 | 4.991 | 5.901 | 6.510  | 5.595  | 9.858 | tryptophan-rich antigen tryptophan-rich protein                                                        |
| PVVCY_0601120 | 3.776 | 5.545 | 6.888  | 6.080  | 9.859 | succinyl-CoA ligase, putative                                                                          |
| PVVCY_0100340 | 6.324 | 6.905 | 7.163  | 5.779  | 9.862 | mitochondrial chaperone BCS1, putative                                                                 |

|               |        |        |        |        |       |                                                                      |
|---------------|--------|--------|--------|--------|-------|----------------------------------------------------------------------|
| PVVCY_0200940 | 2.097  | 2.823  | 3.280  | 2.368  | 9.862 | conserved Plasmodium protein, unknown function                       |
| PVVCY_1001460 | 6.205  | 6.437  | 6.464  | 5.439  | 9.865 | GTP-binding protein, putative                                        |
| PVVCY_1202370 | 8.297  | 8.221  | 8.004  | 7.062  | 9.868 | tyrosine--tRNA ligase, putative                                      |
| PVVCY_1000480 | 7.073  | 8.378  | 9.399  | 8.950  | 9.868 | ATP synthase subunit C, putative                                     |
| PVVCY_1404900 | 4.764  | 5.955  | 6.842  | 6.139  | 9.870 | dihydrolipoyl dehydrogenase, mitochondrial, putative                 |
| PVVCY_1203160 | 2.101  | 3.397  | 4.396  | 3.820  | 9.875 | conserved Plasmodium protein, unknown function                       |
| PVVCY_0803200 | 6.874  | 7.535  | 7.974  | 7.227  | 9.879 | mitochondrial-processing peptidase subunit beta, putative            |
| PVVCY_1404720 | 7.565  | 7.845  | 7.914  | 6.830  | 9.883 | ATP-dependent protease subunit ClpQ, putative                        |
| PVVCY_1302190 | 7.962  | 8.148  | 8.234  | 7.772  | 9.885 | conserved Plasmodium protein, unknown function                       |
| PVVCY_1302270 | 3.528  | 4.707  | 5.612  | 5.022  | 9.886 | vacuolar protein sorting-associated protein 4, putative              |
| PVVCY_0301060 | 4.931  | 4.986  | 4.880  | 3.885  | 9.886 | multidrug efflux pump, putative                                      |
| PVVCY_1001950 | 4.199  | 5.070  | 5.786  | 5.650  | 9.887 | conserved Plasmodium protein, unknown function                       |
| PVVCY_1202520 | 1.445  | 2.784  | 3.901  | 3.787  | 9.890 | glycosyltransferase family 28 protein, putative                      |
| PVVCY_1304930 | 7.531  | 7.552  | 7.437  | 6.571  | 9.890 | glutamine--tRNA ligase, putative                                     |
| PVVCY_1002260 | 8.099  | 9.002  | 9.686  | 9.144  | 9.890 | ubiquinol-cytochrome c reductase hinge protein, putative             |
| PVVCY_1302830 | 4.758  | 6.537  | 7.953  | 7.296  | 9.898 | replication factor C subunit 3, putative                             |
| PVVCY_0500720 | 4.890  | 5.270  | 5.451  | 4.474  | 9.905 | citrate synthase, mitochondrial precursor, putative                  |
| PVVCY_0502310 | 3.556  | 4.728  | 5.623  | 4.910  | 9.905 | steroid dehydrogenase, putative                                      |
| PVVCY_0500870 | 4.030  | 4.718  | 5.283  | 5.120  | 9.908 | conserved Plasmodium protein, unknown function                       |
| PVVCY_1203860 | 7.226  | 7.756  | 8.085  | 7.236  | 9.909 | mitochondrial processing peptidase alpha subunit, putative           |
| PVVCY_1003810 | 8.872  | 9.261  | 9.447  | 8.437  | 9.910 | CUGBP Elav-like family member 2, putative                            |
| PVVCY_0900790 | 9.114  | 10.329 | 11.276 | 10.633 | 9.910 | endoplasmic reticulum-resident calcium binding protein, putative     |
| PVVCY_1300900 | 5.121  | 6.413  | 7.387  | 6.455  | 9.913 | WD repeat-containing protein, putative                               |
| PVVCY_1300710 | 2.753  | 3.983  | 5.080  | 5.387  | 9.914 | conserved Plasmodium protein, unknown function                       |
| PVVCY_1403640 | 7.444  | 7.500  | 7.460  | 6.843  | 9.919 | arginine--tRNA ligase, putative                                      |
| PVVCY_1305890 | 10.352 | 10.540 | 10.520 | 9.226  | 9.919 | DNA-directed RNA polymerases I, II, and III subunit RPABC4, putative |
| PVVCY_1306170 | 6.541  | 7.095  | 7.434  | 6.461  | 9.919 | isocitrate dehydrogenase [NADP], mitochondrial, putative             |

|               |       |       |       |       |        |                                                                    |
|---------------|-------|-------|-------|-------|--------|--------------------------------------------------------------------|
| PVVCY_0901240 | 3.909 | 5.012 | 5.865 | 5.182 | 9.922  | conserved Plasmodium protein, unknown function                     |
| PVVCY_1101940 | 8.877 | 9.157 | 9.262 | 8.278 | 9.923  | cell division cycle protein 48 homologue, putative                 |
| PVVCY_1303840 | 6.460 | 7.108 | 7.586 | 7.000 | 9.929  | DNA-directed RNA polymerase, alpha subunit, putative               |
| PVVCY_0700400 | 6.903 | 6.966 | 6.949 | 6.421 | 9.932  | ubiquitin conjugation factor E4 B, putative                        |
| PVVCY_1001580 | 2.160 | 3.275 | 4.175 | 3.682 | 9.937  | protein kinase, putative                                           |
| PVVCY_0401660 | 7.454 | 7.610 | 7.667 | 7.076 | 9.940  | coatomer subunit beta, putative                                    |
| PVVCY_1402980 | 2.697 | 4.062 | 5.142 | 4.302 | 9.948  | peptidase family C50, putative                                     |
| PVVCY_0803080 | 5.882 | 6.373 | 6.767 | 6.500 | 9.950  | peptide chain release factor 1, putative                           |
| PVVCY_1100450 | 4.963 | 5.200 | 5.351 | 4.909 | 9.952  | cation transporting P-ATPase, putative                             |
| PVVCY_0904550 | 5.028 | 5.623 | 6.072 | 5.506 | 9.956  | conserved Plasmodium protein, unknown function                     |
| PVVCY_1000670 | 5.655 | 5.949 | 6.090 | 5.173 | 9.957  | RAP protein, putative                                              |
| PVVCY_1306150 | 5.736 | 6.275 | 6.626 | 5.640 | 9.962  | ubiquitin-conjugating enzyme E2, putative                          |
| PVVCY_1104590 | 2.079 | 3.483 | 4.676 | 4.353 | 9.963  | glycosylphosphatidylinositol anchor attachment 1 protein, putative |
| PVVCY_0300820 | 5.469 | 5.917 | 6.230 | 5.540 | 9.971  | monocarboxylate transporter, putative                              |
| PVVCY_1305230 | 5.411 | 5.379 | 5.292 | 4.795 | 9.974  | conserved Plasmodium protein, unknown function                     |
| PVVCY_1100770 | 3.857 | 5.333 | 6.612 | 6.393 | 9.977  | subtilisin-like protease 3, putative                               |
| PVVCY_1305130 | 3.526 | 4.862 | 6.013 | 5.748 | 9.980  | conserved Plasmodium protein, unknown function                     |
| PVVCY_1203150 | 4.573 | 4.578 | 4.525 | 4.023 | 9.982  | conserved Plasmodium protein, unknown function                     |
| PVVCY_0501870 | 4.485 | 5.084 | 5.460 | 4.106 | 9.983  | flavoprotein subunit of succinate dehydrogenase, putative          |
| PVVCY_1400580 | 4.335 | 5.467 | 6.422 | 5.988 | 9.986  | membrane integral peptidase, M50 family, putative                  |
| PVVCY_0802380 | 5.787 | 5.965 | 6.016 | 5.052 | 9.989  | thioredoxin-like protein 2, putative                               |
| PVVCY_1302840 | 4.481 | 5.742 | 6.822 | 6.442 | 9.992  | DNA polymerase alpha subunit B, putative                           |
| PVVCY_0200350 | 4.848 | 5.898 | 6.760 | 6.069 | 9.997  | conserved Plasmodium protein, unknown function                     |
| PVVCY_0500170 | 4.336 | 5.945 | 7.274 | 6.290 | 9.998  | DNA polymerase delta catalytic subunit, putative                   |
| PVVCY_0401250 | 5.011 | 5.857 | 6.558 | 6.059 | 9.999  | conserved Plasmodium protein, unknown function                     |
| PVVCY_1001280 | 9.621 | 9.653 | 9.598 | 8.812 | 10.004 | small nuclear ribonucleoprotein Sm D3, putative                    |
| PVVCY_1104660 | 4.993 | 5.422 | 5.708 | 4.783 | 10.005 | conserved Plasmodium protein, unknown function                     |

|               |        |        |        |        |        |                                                                      |
|---------------|--------|--------|--------|--------|--------|----------------------------------------------------------------------|
| PVVCY_1202330 | 7.865  | 8.075  | 8.198  | 7.580  | 10.005 | ubiquitin regulatory protein, putative                               |
| PVVCY_0601960 | 9.186  | 9.561  | 9.803  | 8.891  | 10.012 | conserved Plasmodium protein, unknown function                       |
| PVVCY_1102450 | 7.376  | 8.253  | 8.977  | 8.348  | 10.012 | anaphase-promoting complex subunit 11, putative                      |
| PVVCY_1403170 | 8.019  | 7.719  | 7.385  | 6.746  | 10.016 | conserved Plasmodium protein, unknown function                       |
| PVVCY_1302820 | 0.899  | 1.944  | 2.823  | 2.217  | 10.017 | conserved Plasmodium protein, unknown function                       |
| PVVCY_1100360 | 6.902  | 7.446  | 7.851  | 7.004  | 10.017 | 50S ribosomal protein L28, apicoplast, putative                      |
| PVVCY_0500570 | 5.762  | 6.536  | 7.166  | 6.489  | 10.019 | conserved Plasmodium protein, unknown function                       |
| PVVCY_0801890 | 4.327  | 4.892  | 5.383  | 5.184  | 10.021 | conserved Plasmodium protein, unknown function                       |
| PVVCY_0300210 | 8.468  | 9.899  | 11.087 | 9.954  | 10.029 | conserved Plasmodium protein, unknown function                       |
| PVVCY_1002100 | 6.290  | 6.136  | 5.914  | 5.020  | 10.032 | peptide chain release factor 1, putative                             |
| PVVCY_1204670 | 5.310  | 5.643  | 5.870  | 5.063  | 10.033 | conserved Plasmodium protein, unknown function                       |
| PVVCY_1306590 | 7.835  | 7.970  | 8.020  | 7.220  | 10.038 | lysine--tRNA ligase, putative                                        |
| PVVCY_1301640 | 11.150 | 11.195 | 11.149 | 10.178 | 10.039 | elongation factor 2, putative                                        |
| PVVCY_1004470 | 6.225  | 6.325  | 6.351  | 5.642  | 10.040 | U2 snRNP-associated SURP motif-containing protein, putative          |
| PVVCY_0400870 | 6.438  | 6.478  | 6.465  | 5.917  | 10.043 | YTH domain-containing protein, putative                              |
| PVVCY_0100440 | 5.928  | 6.650  | 7.138  | 5.216  | 10.044 | mitochondrial ribosomal protein L41, putative                        |
| PVVCY_1100510 | 4.570  | 6.358  | 7.932  | 7.307  | 10.044 | 2-oxoisovalerate dehydrogenase subunit beta, mitochondrial, putative |
| PVVCY_0601430 | 9.298  | 9.584  | 9.825  | 9.565  | 10.055 | conserved Plasmodium protein, unknown function                       |
| PVVCY_1001290 | 6.227  | 6.029  | 5.799  | 5.203  | 10.060 | helicase SKI2W, putative                                             |
| PVVCY_1405130 | 3.014  | 4.263  | 5.411  | 5.410  | 10.063 | protein TOC75, putative                                              |
| PVVCY_1003530 | 5.849  | 5.970  | 6.024  | 5.291  | 10.065 | AAA family ATPase, putative                                          |
| PVVCY_1103670 | 5.257  | 6.305  | 7.254  | 7.041  | 10.069 | high mobility group protein B4, putative                             |
| PVVCY_0803060 | 7.294  | 9.359  | 11.204 | 10.418 | 10.070 | profilin, putative                                                   |
| PVVCY_1405100 | 3.759  | 5.257  | 6.619  | 6.360  | 10.071 | DNA polymerase epsilon subunit B, putative                           |
| PVVCY_1003880 | 5.179  | 5.970  | 6.658  | 6.116  | 10.071 | aldo-keto reductase, putative                                        |
| PVVCY_1200480 | 6.077  | 6.749  | 7.322  | 6.711  | 10.071 | conserved Plasmodium protein, unknown function                       |
| PVVCY_0400570 | 8.044  | 8.262  | 8.419  | 7.797  | 10.080 | membrane magnesium transporter, putative                             |

|               |        |        |        |        |        |                                                                      |
|---------------|--------|--------|--------|--------|--------|----------------------------------------------------------------------|
| PVVCY_1203260 | 12.238 | 12.012 | 11.767 | 11.280 | 10.081 | 60S ribosomal protein L2, putative                                   |
| PVVCY_0601340 | 1.312  | 2.254  | 3.059  | 2.095  | 10.082 | conserved Plasmodium protein, unknown function                       |
| PVVCY_0902660 | 6.409  | 6.951  | 7.385  | 6.422  | 10.082 | geranylgeranyl pyrophosphate synthase, putative                      |
| PVVCY_1103490 | 5.585  | 5.936  | 6.252  | 6.118  | 10.083 | conserved Plasmodium protein, unknown function                       |
| PVVCY_0904560 | 7.361  | 8.473  | 9.432  | 8.381  | 10.088 | conserved Plasmodium protein, unknown function                       |
| PVVCY_1201250 | 3.896  | 5.208  | 6.439  | 6.558  | 10.093 | conserved Plasmodium protein, unknown function                       |
| PVVCY_0401320 | 2.409  | 3.277  | 4.051  | 3.488  | 10.096 | DER1-like protein, putative                                          |
| PVVCY_1300440 | 4.876  | 6.427  | 7.830  | 7.132  | 10.098 | DNA primase small subunit, putative                                  |
| PVVCY_1001170 | 6.322  | 6.333  | 6.307  | 5.720  | 10.107 | tRNA pseudouridine synthase, putative                                |
| PVVCY_1002280 | 5.646  | 6.074  | 6.418  | 5.461  | 10.109 | phosphoenolpyruvate carboxylase, putative                            |
| PVVCY_0900640 | 8.966  | 8.855  | 8.718  | 8.166  | 10.111 | U6 snRNA-associated Sm-like protein LSm4, putative                   |
| PVVCY_0300910 | 6.013  | 6.346  | 6.597  | 5.507  | 10.118 | ubiquinol-cytochrome-c reductase complex assembly factor 1, putative |
| PVVCY_1202070 | 4.431  | 4.560  | 4.647  | 4.028  | 10.118 | Cg2 protein, putative                                                |
| PVVCY_0502370 | 5.534  | 6.255  | 6.882  | 5.932  | 10.121 | conserved Plasmodium protein, unknown function                       |
| PVVCY_1402750 | 4.623  | 5.199  | 5.724  | 5.382  | 10.121 | RNA-binding protein, putative                                        |
| PVVCY_0501280 | 5.557  | 5.988  | 6.389  | 6.225  | 10.132 | zinc finger, C3HC4 type, putative                                    |
| PVVCY_0301470 | 5.028  | 6.521  | 7.915  | 7.454  | 10.132 | ATP synthase F1, alpha subunit, putative                             |
| PVVCY_0904590 | 6.247  | 6.986  | 7.647  | 6.839  | 10.134 | mitochondrial ATP synthase delta subunit, putative                   |
| PVVCY_0100670 | 7.380  | 7.542  | 7.662  | 6.947  | 10.139 | coatamer alpha subunit, putative                                     |
| PVVCY_1003000 | 7.163  | 7.256  | 7.318  | 6.760  | 10.141 | ubiquitin fusion degradation protein UFD1, putative                  |
| PVVCY_1401170 | 8.267  | 8.794  | 9.250  | 8.283  | 10.142 | 26S protease regulatory subunit 7, putative                          |
| PVVCY_1201500 | 7.074  | 8.481  | 9.821  | 9.684  | 10.148 | ribonucleotide reductase small subunit, putative                     |
| PVVCY_1203130 | 5.537  | 5.453  | 5.332  | 4.404  | 10.148 | conserved Plasmodium protein, unknown function                       |
| PVVCY_0400300 | 2.319  | 3.767  | 5.127  | 4.527  | 10.150 | IBR domain protein, putative                                         |
| PVVCY_1104210 | 8.936  | 9.287  | 9.551  | 7.857  | 10.151 | conserved Plasmodium protein, unknown function                       |
| PVVCY_0500520 | 4.173  | 4.065  | 3.929  | 3.131  | 10.151 | ribosomal silencing factor RsfS, putative                            |
| PVVCY_0904380 | 4.035  | 4.886  | 5.697  | 5.500  | 10.169 | ABC transporter B family member 3, putative                          |

|               |       |        |        |        |        |                                                    |
|---------------|-------|--------|--------|--------|--------|----------------------------------------------------|
| PVVCY_0502480 | 6.344 | 8.516  | 10.569 | 9.671  | 10.169 | tryptophan-rich antigen tryptophan-rich protein    |
| PVVCY_1200050 | 0.593 | 1.055  | 1.483  | 1.055  | 10.172 | PIR protein CIR protein                            |
| PVVCY_1405770 | 7.120 | 6.938  | 6.751  | 6.450  | 10.174 | queuine tRNA-ribosyltransferase, putative          |
| PVVCY_0300780 | 9.559 | 9.460  | 9.348  | 8.873  | 10.175 | ATP-dependent RNA helicase UAP56, putative         |
| PVVCY_0801850 | 5.796 | 6.047  | 6.260  | 5.486  | 10.176 | CS domain protein, putative                        |
| PVVCY_0902920 | 8.059 | 8.562  | 9.019  | 8.224  | 10.176 | 26S protease regulatory subunit 6A, putative       |
| PVVCY_0700680 | 8.689 | 8.878  | 9.022  | 7.786  | 10.183 | conserved Plasmodium protein, unknown function     |
| PVVCY_1000210 | 6.116 | 6.389  | 6.639  | 6.183  | 10.185 | conserved Plasmodium protein, unknown function     |
| PVVCY_0300140 | 9.137 | 9.360  | 9.543  | 8.458  | 10.190 | Plasmodium exported protein, unknown function      |
| PVVCY_1203240 | 8.251 | 8.045  | 7.817  | 6.855  | 10.191 | ubiquitin carboxyl-terminal hydrolase 2, putative  |
| PVVCY_0100330 | 7.017 | 7.284  | 7.518  | 6.656  | 10.191 | RNA-binding protein, putative                      |
| PVVCY_1401020 | 4.382 | 5.445  | 6.478  | 6.364  | 10.198 | mitochondrial ATP synthase delta subunit, putative |
| PVVCY_1404060 | 3.340 | 3.836  | 4.304  | 3.657  | 10.200 | conserved Plasmodium protein, unknown function     |
| PVVCY_0801360 | 6.306 | 6.915  | 7.504  | 7.144  | 10.209 | ribonuclease H2 subunit C, putative                |
| PVVCY_1201390 | 6.869 | 7.151  | 7.411  | 6.628  | 10.213 | prohibitin, putative                               |
| PVVCY_0802490 | 2.301 | 2.785  | 3.240  | 2.273  | 10.213 | conserved Plasmodium protein, unknown function     |
| PVVCY_1403140 | 6.328 | 7.671  | 8.985  | 8.838  | 10.214 | dynein light chain 1, putative                     |
| PVVCY_1001110 | 5.277 | 5.808  | 6.313  | 5.462  | 10.215 | peptide deformylase, putative                      |
| PVVCY_1201550 | 6.944 | 7.530  | 8.088  | 7.177  | 10.215 | conserved Plasmodium protein, unknown function     |
| PVVCY_1306240 | 6.043 | 5.915  | 5.772  | 4.803  | 10.217 | conserved Plasmodium protein, unknown function     |
| PVVCY_0900370 | 8.659 | 9.023  | 9.371  | 8.806  | 10.219 | thioredoxin, putative                              |
| PVVCY_1002160 | 9.181 | 10.188 | 11.177 | 11.001 | 10.223 | conserved Plasmodium protein, unknown function     |
| PVVCY_0200780 | 5.899 | 7.373  | 8.823  | 8.657  | 10.225 | cyclase-associated protein, putative               |
| PVVCY_1000150 | 9.664 | 11.453 | 13.207 | 12.577 | 10.226 | conserved Plasmodium protein, unknown function     |
| PVVCY_0902310 | 2.658 | 3.717  | 4.757  | 4.453  | 10.227 | conserved Plasmodium protein, unknown function     |
| PVVCY_1102540 | 4.600 | 5.236  | 5.865  | 5.868  | 10.235 | DNA polymerase 1, putative                         |
| PVVCY_1302260 | 4.798 | 4.828  | 4.850  | 3.866  | 10.239 | conserved Plasmodium protein, unknown function     |



|               |        |        |        |        |        |                                                                                             |
|---------------|--------|--------|--------|--------|--------|---------------------------------------------------------------------------------------------|
| PVVCY_1302710 | 7.975  | 7.774  | 7.567  | 6.697  | 10.240 | valine--tRNA ligase, putative                                                               |
| PVVCY_1203640 | 4.176  | 4.306  | 4.428  | 3.495  | 10.242 | conserved Plasmodium protein, unknown function                                              |
| PVVCY_1204120 | 5.965  | 6.358  | 6.738  | 5.309  | 10.242 | conserved Plasmodium protein, unknown function                                              |
| PVVCY_1406140 | 9.035  | 10.925 | 12.804 | 12.140 | 10.250 | actin II, putative                                                                          |
| PVVCY_1101440 | 5.585  | 5.546  | 5.505  | 4.765  | 10.251 | conserved Plasmodium protein, unknown function                                              |
| PVVCY_0101080 | 3.855  | 5.912  | 7.962  | 7.390  | 10.252 | succinate dehydrogenase subunit 3, putative                                                 |
| PVVCY_1200720 | 4.227  | 5.868  | 7.505  | 7.386  | 10.252 | endonuclease, putative                                                                      |
| PVVCY_0400420 | 3.265  | 4.180  | 5.094  | 5.152  | 10.258 | conserved Plasmodium protein, unknown function                                              |
| PVVCY_1404570 | 4.347  | 4.337  | 4.327  | 3.506  | 10.259 | conserved Plasmodium protein, unknown function                                              |
| PVVCY_1400890 | 4.747  | 5.377  | 6.007  | 5.236  | 10.259 | conserved Plasmodium protein, unknown function                                              |
| PVVCY_0300450 | 8.282  | 8.744  | 9.209  | 8.099  | 10.263 | 26S proteasome regulatory subunit RPN1, putative                                            |
| PVVCY_1303080 | 6.770  | 7.573  | 8.380  | 7.907  | 10.267 | conserved Plasmodium protein, unknown function                                              |
| PVVCY_0903810 | 3.680  | 4.472  | 5.272  | 4.712  | 10.271 | adrenodoxin reductase, putative                                                             |
| PVVCY_0901540 | 5.456  | 6.404  | 7.362  | 7.286  | 10.281 | deubiquinating_deneddylating enzyme, putative                                               |
| PVVCY_1202200 | 6.353  | 6.522  | 6.703  | 5.828  | 10.283 | conserved Plasmodium protein, unknown function                                              |
| PVVCY_1402360 | 7.318  | 8.169  | 9.040  | 8.124  | 10.284 | mitochondrial ATP synthase F1, epsilon subunit, putative                                    |
| PVVCY_0300340 | 10.195 | 10.271 | 10.358 | 9.614  | 10.289 | hexose transporter, putative                                                                |
| PVVCY_1001920 | 4.836  | 4.851  | 4.882  | 3.709  | 10.289 | acid phosphatase, putative                                                                  |
| PVVCY_1201820 | 4.650  | 4.914  | 5.193  | 4.597  | 10.296 | UDP-N-acetylglucosamine--dolichyl-phosphate N-acetylglucosaminophosphotransferase, putative |
| PVVCY_1402970 | 1.373  | 2.331  | 3.322  | 2.402  | 10.297 | peptidase family C50, putative                                                              |
| PVVCY_0401610 | 5.244  | 6.081  | 6.943  | 6.467  | 10.300 | Maf-like protein, putative                                                                  |
| PVVCY_1104860 | 0.760  | 1.249  | 1.750  | 1.526  | 10.300 | PIR protein CIR protein                                                                     |
| PVVCY_1102610 | 6.483  | 6.733  | 7.003  | 6.290  | 10.304 | oxidoreductase, putative                                                                    |
| PVVCY_1404350 | 5.314  | 7.006  | 8.740  | 8.623  | 10.311 | proliferating cell nuclear antigen 2, putative                                              |
| PVVCY_0502340 | 8.957  | 10.105 | 11.298 | 10.581 | 10.313 | alpha tubulin 1, putative                                                                   |
| PVVCY_1300090 | 1.967  | 2.199  | 2.443  | 2.215  | 10.317 | PIR protein CIR protein                                                                     |

|               |        |        |        |        |        |                                                                          |
|---------------|--------|--------|--------|--------|--------|--------------------------------------------------------------------------|
| PVVCY_1401160 | 7.669  | 7.786  | 7.921  | 7.349  | 10.318 | AP-1 complex subunit mu-1, putative                                      |
| PVVCY_0900780 | 4.717  | 5.989  | 7.311  | 6.781  | 10.320 | succinyl-CoA synthetase alpha subunit, putative                          |
| PVVCY_0700420 | 5.615  | 6.233  | 6.875  | 6.585  | 10.320 | SPRY domain, putative                                                    |
| PVVCY_1103980 | 5.998  | 6.717  | 7.495  | 6.246  | 10.326 | conserved Plasmodium protein, unknown function                           |
| PVVCY_1103270 | 5.513  | 7.183  | 8.923  | 8.393  | 10.331 | DNA replication licensing factor MCM6, putative                          |
| PVVCY_1003250 | 3.784  | 3.988  | 4.219  | 3.592  | 10.332 | conserved Plasmodium protein, unknown function                           |
| PVVCY_0800870 | 5.564  | 6.545  | 7.591  | 6.582  | 10.332 | cGMP-dependent protein kinase, putative                                  |
| PVVCY_1306420 | 6.281  | 6.258  | 6.256  | 5.576  | 10.335 | elongation factor Tu, putative                                           |
| PVVCY_1304840 | 2.359  | 3.346  | 4.402  | 3.485  | 10.341 | GPI transamidase subunit PIG-U, putative                                 |
| PVVCY_0201400 | 7.450  | 7.464  | 7.507  | 6.780  | 10.347 | AP-4 complex subunit beta, putative                                      |
| PVVCY_1000840 | 2.786  | 3.822  | 4.927  | 4.385  | 10.358 | conserved Plasmodium protein, unknown function                           |
| PVVCY_1303430 | 7.585  | 7.780  | 8.004  | 7.569  | 10.360 | derlin-1, putative                                                       |
| PVVCY_0901050 | 4.353  | 4.968  | 5.645  | 5.038  | 10.372 | conserved Plasmodium protein, unknown function                           |
| PVVCY_0400980 | 8.288  | 8.267  | 8.293  | 7.346  | 10.374 | conserved Plasmodium protein, unknown function                           |
| PVVCY_0904260 | 15.811 | 15.813 | 15.915 | 14.107 | 10.383 | 60S ribosomal protein L41, putative                                      |
| PVVCY_1003120 | 6.468  | 6.396  | 6.358  | 5.722  | 10.396 | lysine--tRNA ligase, putative                                            |
| PVVCY_0101050 | 8.343  | 8.520  | 8.765  | 7.851  | 10.398 | transketolase, putative                                                  |
| PVVCY_1200770 | 8.579  | 9.632  | 10.799 | 10.038 | 10.399 | tubulin beta chain, putative                                             |
| PVVCY_1201290 | 7.243  | 7.132  | 7.045  | 6.561  | 10.402 | conserved Plasmodium protein, unknown function                           |
| PVVCY_1202840 | 7.382  | 7.609  | 7.886  | 7.351  | 10.405 | serine threonine protein phosphatase 2B catalytic subunit A, putative    |
| PVVCY_1400550 | 5.789  | 5.833  | 5.940  | 5.050  | 10.405 | conserved Plasmodium protein, unknown function                           |
| PVVCY_0803370 | 4.828  | 5.814  | 6.894  | 6.484  | 10.408 | phosphatidylinositol N-acetylglucosaminyltransferase subunit P, putative |
| PVVCY_0101140 | 13.031 | 13.035 | 13.078 | 12.510 | 10.409 | 60S ribosomal protein L39, putative                                      |
| PVVCY_1103680 | 6.718  | 6.563  | 6.431  | 5.949  | 10.416 | exosome complex exonuclease RRP44, putative                              |
| PVVCY_1202010 | 7.310  | 7.929  | 8.640  | 7.960  | 10.416 | Cg8 protein, putative                                                    |
| PVVCY_1402730 | 5.666  | 5.923  | 6.263  | 5.400  | 10.423 | conserved Plasmodium protein, unknown function                           |
| PVVCY_0402020 | 4.577  | 6.290  | 8.188  | 7.465  | 10.427 | hypothetical protein                                                     |

|               |        |        |        |        |        |                                                                   |
|---------------|--------|--------|--------|--------|--------|-------------------------------------------------------------------|
| PVVCY_0700070 | 4.247  | 6.235  | 8.395  | 8.139  | 10.428 | Plasmodium exported protein (PHIST), unknown function             |
| PVVCY_0904300 | 5.059  | 5.379  | 5.775  | 5.083  | 10.428 | apicoplast import protein Tic20, putative                         |
| PVVCY_1201660 | 4.687  | 4.534  | 4.414  | 3.840  | 10.429 | conserved Plasmodium protein, unknown function                    |
| PVVCY_1400270 | 4.732  | 4.777  | 4.873  | 4.280  | 10.432 | conserved Plasmodium protein, unknown function                    |
| PVVCY_0300370 | 0.811  | 1.637  | 2.510  | 2.764  | 10.438 | conserved Plasmodium protein, unknown function                    |
| PVVCY_1302090 | 2.282  | 2.460  | 2.695  | 2.186  | 10.441 | conserved Plasmodium protein, unknown function                    |
| PVVCY_0700880 | 9.350  | 9.842  | 10.399 | 10.114 | 10.442 | protein transport protein SEC61 subunit beta, putative            |
| PVVCY_0400560 | 6.599  | 7.464  | 8.504  | 7.267  | 10.444 | conserved Plasmodium protein, unknown function                    |
| PVVCY_1306340 | 11.105 | 10.815 | 10.563 | 9.842  | 10.449 | DNA_RNA-binding protein Alba 4, putative                          |
| PVVCY_1404860 | 7.878  | 8.339  | 8.960  | 7.574  | 10.450 | asparagine-rich protein, putative                                 |
| PVVCY_0201260 | 4.903  | 5.840  | 6.888  | 6.562  | 10.454 | conserved Plasmodium protein, unknown function                    |
| PVVCY_1102570 | 5.617  | 5.724  | 5.878  | 5.465  | 10.459 | poly(A) polymerase PAP, putative                                  |
| PVVCY_1202080 | 4.272  | 4.858  | 5.500  | 5.480  | 10.460 | Cg7 protein, putative                                             |
| PVVCY_1301920 | 5.688  | 5.884  | 6.163  | 5.458  | 10.461 | RNA-binding protein, putative                                     |
| PVVCY_0701400 | 6.690  | 6.632  | 6.636  | 5.914  | 10.464 | chaperone protein ClpB1, putative                                 |
| PVVCY_1004120 | 5.281  | 5.459  | 5.728  | 4.938  | 10.466 | pentatricopeptide repeat domain-containing protein, putative      |
| PVVCY_1302610 | 5.359  | 6.020  | 6.805  | 6.182  | 10.472 | apicoplast ribosomal protein S10 precursor, putative              |
| PVVCY_1300640 | 5.422  | 5.599  | 5.847  | 5.293  | 10.474 | major facilitator superfamily domain-containing protein, putative |
| PVVCY_1300480 | 5.261  | 4.934  | 4.673  | 3.696  | 10.481 | DEAD_DEAH helicase, putative                                      |
| PVVCY_1403900 | 5.635  | 6.171  | 6.814  | 6.285  | 10.481 | conserved Plasmodium protein, unknown function                    |
| PVVCY_0800960 | 7.476  | 7.728  | 8.126  | 6.955  | 10.485 | ataxin-2 like protein, putative                                   |
| PVVCY_0400750 | 7.401  | 7.589  | 7.813  | 7.667  | 10.493 | pre-mRNA-processing factor 19, putative                           |
| PVVCY_1303220 | 8.051  | 8.501  | 9.105  | 8.126  | 10.498 | 26S proteasome regulatory subunit RPN2, putative                  |
| PVVCY_0902550 | 4.316  | 5.350  | 6.541  | 6.123  | 10.498 | protein disulfide-isomerase, putative                             |
| PVVCY_1101740 | 7.656  | 7.540  | 7.468  | 6.953  | 10.498 | mitochondrial import receptor subunit TOM40, putative             |
| PVVCY_0600440 | 4.461  | 5.019  | 5.622  | 5.759  | 10.500 | conserved Plasmodium protein, unknown function                    |
| PVVCY_1405160 | 7.583  | 8.137  | 8.852  | 7.937  | 10.501 | conserved Plasmodium protein, unknown function                    |

|               |       |       |        |        |        |                                                                         |
|---------------|-------|-------|--------|--------|--------|-------------------------------------------------------------------------|
| PVVCY_0904240 | 7.344 | 7.329 | 7.447  | 6.252  | 10.507 | mitochondrial large subunit ribosomal protein, putative                 |
| PVVCY_0601590 | 6.042 | 5.921 | 5.891  | 4.967  | 10.508 | thioredoxin-like protein                                                |
| PVVCY_1003610 | 4.028 | 4.375 | 4.732  | 4.985  | 10.512 | conserved Plasmodium protein, unknown function                          |
| PVVCY_1003920 | 5.584 | 5.636 | 5.763  | 5.173  | 10.512 | conserved Plasmodium protein, unknown function                          |
| PVVCY_1103390 | 3.948 | 4.526 | 5.224  | 4.787  | 10.514 | phosphatase 2A regulatory subunit-related protein, putative             |
| PVVCY_1203880 | 7.273 | 7.810 | 8.480  | 7.875  | 10.515 | conserved Plasmodium protein, unknown function                          |
| PVVCY_1402940 | 9.481 | 9.985 | 10.702 | 9.406  | 10.518 | acyl-CoA binding protein, putative                                      |
| PVVCY_1102730 | 5.360 | 5.623 | 6.003  | 5.285  | 10.519 | mitochondrial import inner membrane translocase subunit TIM22, putative |
| PVVCY_1401730 | 4.202 | 5.806 | 7.685  | 6.996  | 10.523 | transcription factor with AP2 domain(s)                                 |
| PVVCY_0902820 | 3.374 | 4.390 | 5.578  | 5.177  | 10.524 | A_G-specific adenine glycosylase, putative                              |
| PVVCY_0201460 | 7.188 | 7.489 | 7.976  | 6.749  | 10.524 | Plasmodium exported protein, unknown function                           |
| PVVCY_1402820 | 7.424 | 7.256 | 7.148  | 6.494  | 10.525 | ER membrane protein complex subunit 1, putative                         |
| PVVCY_1101850 | 4.521 | 5.771 | 7.227  | 6.826  | 10.530 | malate dehydrogenase, putative                                          |
| PVVCY_1102750 | 3.552 | 4.243 | 5.099  | 4.471  | 10.533 | conserved Plasmodium protein, unknown function                          |
| PVVCY_1103890 | 4.590 | 6.190 | 8.103  | 7.274  | 10.540 | conserved Plasmodium protein, unknown function                          |
| PVVCY_0200280 | 9.146 | 9.999 | 11.064 | 10.281 | 10.542 | chromatin assembly factor 1 protein WD40 domain, putative               |
| PVVCY_0901040 | 3.166 | 4.413 | 5.793  | 6.017  | 10.544 | peptidyl-prolyl cis-trans isomerase, putative                           |
| PVVCY_1103380 | 8.455 | 8.591 | 8.861  | 7.999  | 10.564 | ubiquitin-conjugating enzyme, putative                                  |
| PVVCY_0902620 | 2.544 | 3.448 | 4.589  | 3.767  | 10.568 | conserved Plasmodium protein, unknown function                          |
| PVVCY_0903720 | 8.486 | 8.298 | 8.156  | 7.632  | 10.571 | protein phosphatase PPM2, putative                                      |
| PVVCY_1300610 | 2.648 | 3.478 | 4.508  | 3.899  | 10.572 | allantoicase, putative                                                  |
| PVVCY_1302780 | 6.341 | 7.234 | 8.330  | 7.762  | 10.572 | cytochrome c1 precursor, putative                                       |
| PVVCY_1401220 | 4.920 | 5.550 | 6.318  | 5.961  | 10.572 | conserved Plasmodium protein, unknown function                          |
| PVVCY_0701060 | 6.082 | 6.147 | 6.349  | 5.432  | 10.574 | Snf2-related CBP activator, putative                                    |
| PVVCY_1203530 | 4.585 | 4.948 | 5.396  | 5.152  | 10.575 | zinc finger protein, putative                                           |
| PVVCY_1404550 | 5.680 | 6.195 | 6.864  | 6.292  | 10.578 | conserved Plasmodium protein, unknown function                          |
| PVVCY_1301580 | 5.445 | 5.533 | 5.751  | 4.951  | 10.584 | conserved Plasmodium protein, unknown function                          |

|               |       |       |       |       |        |                                                                                       |
|---------------|-------|-------|-------|-------|--------|---------------------------------------------------------------------------------------|
| PVVCY_0401090 | 6.606 | 6.460 | 6.331 | 6.076 | 10.587 | E3 ubiquitin-protein ligase, putative                                                 |
| PVVCY_1200850 | 6.968 | 7.024 | 7.263 | 6.110 | 10.598 | zinc finger protein, putative                                                         |
| PVVCY_0301120 | 3.344 | 3.813 | 4.414 | 4.010 | 10.598 | protein kinase 7, putative                                                            |
| PVVCY_1003020 | 5.457 | 7.067 | 9.028 | 8.367 | 10.604 | DNA replication licensing factor MCM2, putative DNA replication licensing factor MCM2 |
| PVVCY_1405620 | 5.939 | 6.568 | 7.381 | 6.832 | 10.609 | DNA gyrase subunit B, putative                                                        |
| PVVCY_1300950 | 7.003 | 7.037 | 7.183 | 6.510 | 10.610 | heat shock protein 90, putative                                                       |
| PVVCY_1301670 | 5.187 | 5.300 | 5.541 | 4.843 | 10.613 | histone deacetylase, putative                                                         |
| PVVCY_0802640 | 8.343 | 8.775 | 9.288 | 9.209 | 10.614 | cytochrome c oxidase subunit 6B, putative                                             |
| PVVCY_1003650 | 3.893 | 4.738 | 5.878 | 4.887 | 10.617 | plastid replication-repair enzyme, putative                                           |
| PVVCY_1002080 | 7.584 | 7.629 | 7.763 | 7.259 | 10.618 | transcription initiation TFIID-like, putative                                         |
| PVVCY_0201130 | 3.792 | 4.324 | 5.013 | 4.588 | 10.626 | conserved Plasmodium protein, unknown function                                        |
| PVVCY_0803120 | 6.584 | 6.800 | 7.090 | 6.855 | 10.627 | importin alpha re-exporter, putative                                                  |
| PVVCY_1403940 | 8.562 | 8.992 | 9.614 | 8.899 | 10.629 | endoplasmin, putative                                                                 |
| PVVCY_0400210 | 7.970 | 8.218 | 8.575 | 8.184 | 10.636 | exportin-1, putative                                                                  |
| PVVCY_1104460 | 7.783 | 7.673 | 7.661 | 6.976 | 10.637 | alanine--tRNA ligase, putative                                                        |
| PVVCY_1104610 | 4.874 | 4.802 | 4.839 | 4.137 | 10.643 | conserved Plasmodium protein, unknown function                                        |
| PVVCY_0400500 | 7.364 | 8.163 | 9.176 | 8.776 | 10.650 | conserved Plasmodium protein, unknown function                                        |
| PVVCY_0401210 | 4.528 | 5.166 | 5.993 | 5.579 | 10.654 | conserved Plasmodium protein, unknown function                                        |
| PVVCY_0903880 | 1.421 | 2.129 | 3.372 | 3.273 | 10.666 | conserved Plasmodium protein, unknown function                                        |
| PVVCY_0300110 | 1.862 | 2.681 | 3.724 | 3.340 | 10.667 | CIR protein PIR protein                                                               |
| PVVCY_1304370 | 7.381 | 7.867 | 8.674 | 8.679 | 10.671 | conserved Plasmodium protein, unknown function                                        |
| PVVCY_0700580 | 5.502 | 5.679 | 5.935 | 5.695 | 10.677 | lipase maturation factor, putative                                                    |
| PVVCY_1300350 | 3.098 | 3.976 | 5.017 | 5.043 | 10.679 | DNA repair metallo-beta-lactamase protein, putative                                   |
| PVVCY_1303890 | 3.894 | 4.804 | 5.957 | 6.514 | 10.691 | DnaJ protein, putative                                                                |
| PVVCY_1401450 | 4.952 | 5.926 | 7.904 | 7.416 | 10.692 | conserved Plasmodium protein, unknown function                                        |
| PVVCY_1300510 | 6.621 | 7.421 | 8.479 | 7.978 | 10.693 | ubiquinol-cytochrome c reductase iron-sulfur subunit, putative                        |
| PVVCY_0502680 | 1.766 | 2.015 | 2.767 | 2.285 | 10.693 | PIR protein CIR protein                                                               |

|               |       |        |        |        |        |                                                                             |
|---------------|-------|--------|--------|--------|--------|-----------------------------------------------------------------------------|
| PVVCY_1204460 | 5.876 | 5.857  | 5.972  | 5.283  | 10.694 | thioredoxin-like protein, putative                                          |
| PVVCY_0900320 | 6.753 | 6.743  | 6.904  | 6.045  | 10.698 | CCR4-NOT transcription complex subunit 1, putative                          |
| PVVCY_0101460 | 0.255 | 0.876  | 1.976  | 1.905  | 10.698 | PIR protein CIR protein                                                     |
| PVVCY_0903980 | 3.284 | 4.687  | 6.340  | 6.515  | 10.705 | phosphatidylinositol N-acetylglucosaminyltransferase subunit H, putative    |
| PVVCY_1400240 | 9.071 | 10.317 | 12.609 | 12.353 | 10.706 | Plasmodium exported protein, unknown function                               |
| PVVCY_0502360 | 6.404 | 6.281  | 6.237  | 6.001  | 10.707 | pre-mRNA-splicing helicase BRR2, putative                                   |
| PVVCY_1301860 | 5.687 | 5.509  | 5.539  | 5.062  | 10.709 | conserved Plasmodium protein, unknown function                              |
| PVVCY_0601770 | 5.762 | 5.548  | 5.549  | 5.029  | 10.710 | conserved Plasmodium protein, unknown function                              |
| PVVCY_1101890 | 2.269 | 3.119  | 4.676  | 4.519  | 10.711 | phosphatidylinositol N-acetylglucosaminyltransferase subunit GPI1, putative |
| PVVCY_1404850 | 7.832 | 8.036  | 8.741  | 6.532  | 10.711 | conserved Plasmodium protein, unknown function                              |
| PVVCY_0401020 | 3.373 | 3.719  | 4.288  | 3.559  | 10.713 | protein kinase, putative                                                    |
| PVVCY_0200680 | 7.384 | 7.646  | 8.533  | 7.911  | 10.716 | calcium-transporting ATPase, putative                                       |
| PVVCY_1400900 | 3.786 | 4.597  | 6.123  | 5.918  | 10.717 | tyrosine recombinase, putative                                              |
| PVVCY_0301110 | 5.701 | 6.085  | 6.968  | 4.989  | 10.719 | conserved Plasmodium protein, unknown function                              |
| PVVCY_1404030 | 5.652 | 6.064  | 6.630  | 6.317  | 10.720 | DNA gyrase subunit A, putative                                              |
| PVVCY_1002250 | 4.553 | 4.800  | 5.204  | 4.710  | 10.721 | conserved Plasmodium protein, unknown function                              |
| PVVCY_0401770 | 5.619 | 6.711  | 8.083  | 7.860  | 10.723 | replication protein A1, small fragment                                      |
| PVVCY_1203370 | 5.612 | 5.845  | 6.547  | 6.125  | 10.726 | conserved Plasmodium protein, unknown function                              |
| PVVCY_0401980 | 1.854 | 2.237  | 2.833  | 2.224  | 10.726 | PIR protein CIR protein                                                     |
| PVVCY_1002980 | 6.833 | 6.664  | 6.567  | 6.070  | 10.730 | conserved Plasmodium protein, unknown function                              |
| PVVCY_1304140 | 6.912 | 6.743  | 6.658  | 6.101  | 10.730 | conserved Plasmodium protein, unknown function                              |
| PVVCY_0700030 | 6.814 | 7.593  | 9.205  | 8.826  | 10.733 | Plasmodium exported protein, unknown function                               |
| PVVCY_1306700 | 4.902 | 5.047  | 5.411  | 5.252  | 10.737 | conserved Plasmodium protein, unknown function                              |
| PVVCY_1404560 | 5.637 | 6.040  | 6.552  | 6.806  | 10.741 | WD repeat-containing protein, putative                                      |
| PVVCY_0800560 | 5.826 | 5.834  | 6.365  | 5.652  | 10.744 | conserved Plasmodium protein, unknown function                              |
| PVVCY_1300380 | 8.271 | 8.574  | 9.069  | 8.511  | 10.746 | translocation protein sec62, putative                                       |

|               |        |        |        |        |        |                                                           |
|---------------|--------|--------|--------|--------|--------|-----------------------------------------------------------|
| PVVCY_1001520 | 6.502  | 6.949  | 7.816  | 7.692  | 10.750 | alkaline phosphatase, putative                            |
| PVVCY_1200280 | 7.275  | 7.201  | 7.252  | 6.632  | 10.755 | U5 small nuclear ribonuclear protein, putative            |
| PVVCY_1306210 | 9.127  | 9.393  | 10.290 | 9.702  | 10.759 | protein transport protein SEC61 subunit alpha, putative   |
| PVVCY_1002790 | 3.211  | 4.264  | 6.134  | 6.088  | 10.761 | tetratricopeptide repeat protein, putative                |
| PVVCY_0502380 | 7.862  | 7.629  | 7.418  | 7.091  | 10.761 | eukaryotic initiation factor 4A-III, putative             |
| PVVCY_0803430 | 7.233  | 8.662  | 11.401 | 11.074 | 10.765 | fam-a protein                                             |
| PVVCY_0502070 | 4.604  | 4.798  | 5.027  | 5.071  | 10.772 | conserved Plasmodium protein, unknown function            |
| PVVCY_0401710 | 8.043  | 9.297  | 11.695 | 11.433 | 10.775 | high molecular weight rhopty protein 3, putative          |
| PVVCY_1400430 | 5.552  | 6.299  | 7.912  | 7.516  | 10.779 | DNA ligase I, putative                                    |
| PVVCY_0600180 | 6.948  | 7.140  | 7.555  | 6.831  | 10.780 | conserved protein, unknown function                       |
| PVVCY_0600450 | 6.388  | 6.337  | 6.387  | 5.931  | 10.795 | kelch domain-containing protein, putative                 |
| PVVCY_1104380 | 8.255  | 8.184  | 8.260  | 7.603  | 10.801 | conserved Plasmodium protein, unknown function            |
| PVVCY_1003030 | 6.371  | 6.848  | 7.508  | 7.268  | 10.804 | conserved Plasmodium protein, unknown function            |
| PVVCY_0300440 | 4.085  | 4.949  | 6.292  | 6.542  | 10.809 | PH domain-containing protein, putative                    |
| PVVCY_1203310 | 6.001  | 6.769  | 8.240  | 8.110  | 10.811 | FACT complex subunit SPT16, putative                      |
| PVVCY_1301200 | 7.550  | 8.235  | 9.025  | 9.574  | 10.814 | centrin-2, putative                                       |
| PVVCY_0801630 | 9.423  | 9.642  | 10.544 | 9.895  | 10.816 | heat shock protein 70, putative                           |
| PVVCY_1404430 | 4.727  | 5.664  | 7.139  | 6.048  | 10.823 | cyclin-related protein, putative                          |
| PVVCY_1202530 | 2.637  | 3.647  | 5.517  | 5.442  | 10.824 | ferlin, putative                                          |
| PVVCY_1300700 | 6.023  | 7.017  | 8.342  | 8.082  | 10.824 | FACT complex subunit SSRP1, putative                      |
| PVVCY_0201190 | 2.534  | 3.306  | 4.764  | 4.673  | 10.825 | conserved Plasmodium protein, unknown function            |
| PVVCY_0500430 | 3.561  | 3.692  | 4.277  | 3.842  | 10.833 | conserved Plasmodium protein, unknown function            |
| PVVCY_0100450 | 5.107  | 5.041  | 5.164  | 4.391  | 10.839 | conserved Plasmodium protein, unknown function            |
| PVVCY_1303650 | 5.190  | 5.375  | 5.752  | 5.230  | 10.847 | conserved Plasmodium protein, unknown function            |
| PVVCY_0902950 | 4.213  | 5.004  | 6.012  | 6.001  | 10.848 | structural maintenance of chromosomes protein 1, putative |
| PVVCY_1404170 | 3.955  | 4.890  | 6.206  | 5.744  | 10.848 | conserved Plasmodium protein, unknown function            |
| PVVCY_0801520 | 10.017 | 10.108 | 10.719 | 8.899  | 10.849 | conserved Plasmodium protein, unknown function            |

|                    |       |       |       |       |        |                                                            |
|--------------------|-------|-------|-------|-------|--------|------------------------------------------------------------|
| PVVCY_1203750      | 7.688 | 8.015 | 8.392 | 8.531 | 10.849 | conserved Plasmodium protein, unknown function             |
| PVVCY_1403840      | 7.813 | 7.937 | 8.266 | 7.641 | 10.849 | conserved Plasmodium protein, unknown function             |
| PVVCY_0900980      | 4.396 | 5.642 | 7.298 | 7.044 | 10.850 | replication factor C subunit 5, putative                   |
| PVVCY_0401630      | 4.750 | 5.584 | 7.152 | 7.088 | 10.850 | vacuolar protein sorting-associated protein 46, putative   |
| PVVCY_0101560      | 1.002 | 1.407 | 1.938 | 1.885 | 10.853 | PIR protein CIR protein                                    |
| PVVCY_1003370      | 8.670 | 8.566 | 8.861 | 8.270 | 10.853 | serine_threonine protein phosphatase PP1, putative         |
| PVVCY_1000440      | 5.289 | 6.761 | 8.741 | 8.377 | 10.856 | DNA replication licensing factor MCM7, putative            |
| PVVCY_0200900      | 6.807 | 7.218 | 7.814 | 7.561 | 10.860 | parasite-infected erythrocyte surface protein              |
| PVVCY_0600770      | 5.987 | 6.604 | 8.061 | 7.658 | 10.860 | protein phosphatase, putative                              |
| PVVCY_1400840      | 8.216 | 8.122 | 8.289 | 7.261 | 10.861 | carbamoyl phosphate synthetase, putative                   |
| PVVCY_1002200      | 4.788 | 5.620 | 7.108 | 7.145 | 10.861 | DNA mismatch repair protein MSH2, putative                 |
| PVVCY_1300880      | 4.631 | 4.410 | 4.261 | 3.788 | 10.866 | conserved Plasmodium protein, unknown function             |
| PVVCY_0100730      | 5.395 | 5.739 | 6.272 | 5.948 | 10.869 | G-protein associated signal transduction protein, putative |
| PVVCY_0801810      | 4.759 | 5.473 | 6.890 | 6.764 | 10.873 | TLD domain-containing protein                              |
| PVVCY_0101280      | 9.640 | 9.507 | 9.733 | 9.170 | 10.875 | conserved Plasmodium protein, unknown function             |
| PVVCY_1200170      | 3.467 | 4.508 | 5.974 | 5.544 | 10.878 | conserved Plasmodium protein, unknown function             |
| PVVCY_1103930      | 8.014 | 7.717 | 7.574 | 6.746 | 10.881 | RuvB-like helicase 3, putative                             |
| PVVCY_0801690      | 4.401 | 5.157 | 6.145 | 6.105 | 10.885 | ATP-dependent DNA helicase Q1, putative                    |
| PVVCY_0300090.gene | 1.250 | 1.467 | 2.400 | 1.774 | 10.890 | #N/A                                                       |
| PVVCY_1103330      | 8.929 | 9.040 | 9.466 | 8.509 | 10.892 | splicing factor 3B subunit 5, putative                     |
| PVVCY_0902080      | 4.728 | 5.142 | 5.954 | 5.024 | 10.892 | calcium-dependent protein kinase 6, putative               |
| PVVCY_0201530      | 0.744 | 1.064 | 2.014 | 1.597 | 10.897 | PIR protein CIR protein                                    |
| PVVCY_1102350      | 5.821 | 6.215 | 6.934 | 6.247 | 10.901 | superoxide dismutase [Fe], putative                        |
| PVVCY_0601380      | 6.444 | 6.365 | 6.400 | 5.947 | 10.909 | conserved Plasmodium protein, unknown function             |
| PVVCY_0602480      | 0.636 | 0.872 | 1.710 | 1.254 | 10.912 | PIR protein CIR protein                                    |
| PVVCY_0902770      | 5.189 | 6.775 | 8.950 | 8.620 | 10.913 | fam-d protein                                              |
| PVVCY_1300310      | 3.503 | 3.711 | 4.177 | 3.546 | 10.914 | protein kinase, putative                                   |



|               |        |        |        |        |        |                                                                |
|---------------|--------|--------|--------|--------|--------|----------------------------------------------------------------|
| PVVCY_1003420 | 6.881  | 7.065  | 7.381  | 7.141  | 10.919 | DnaJ protein, putative                                         |
| PVVCY_1101460 | 3.342  | 3.920  | 4.715  | 4.601  | 10.923 | ATP-dependent DNA helicase UvrD, putative                      |
| PVVCY_0400270 | 2.701  | 3.599  | 5.529  | 5.254  | 10.926 | spindle pole body protein, putative                            |
| PVVCY_0701750 | 5.143  | 5.466  | 6.423  | 6.031  | 10.933 | conserved Plasmodium protein, unknown function                 |
| PVVCY_1405590 | 5.309  | 6.426  | 8.901  | 8.490  | 10.936 | transcription factor with AP2 domain(s), putative              |
| PVVCY_1104520 | 3.592  | 4.769  | 6.152  | 6.686  | 10.937 | conserved Plasmodium protein, unknown function                 |
| PVVCY_0801190 | 5.428  | 5.291  | 5.227  | 4.867  | 10.943 | protease, putative                                             |
| PVVCY_1302070 | 7.511  | 7.393  | 7.747  | 7.102  | 10.943 | AP-1 complex subunit gamma, putative                           |
| PVVCY_1401720 | 5.543  | 7.007  | 9.134  | 8.552  | 10.945 | DNA replication licensing factor MCM4, putative                |
| PVVCY_0600300 | 11.465 | 11.257 | 11.419 | 10.800 | 10.948 | ubiquitin-conjugating enzyme E2, putative                      |
| PVVCY_0701580 | 4.437  | 5.354  | 7.252  | 7.079  | 10.949 | structural maintenance of chromosomes protein 3, putative      |
| PVVCY_1003860 | 5.457  | 6.144  | 7.165  | 6.827  | 10.950 | DNA damage-inducible protein 1, putative                       |
| PVVCY_0200660 | 2.112  | 3.302  | 4.893  | 4.854  | 10.950 | conserved Plasmodium protein, unknown function                 |
| PVVCY_1101060 | 4.771  | 5.899  | 8.383  | 8.012  | 10.955 | conserved Plasmodium protein, unknown function                 |
| PVVCY_1202790 | 5.907  | 6.402  | 7.079  | 7.372  | 10.956 | mitogen-activated protein kinase organizer 1, putative         |
| PVVCY_1402910 | 5.807  | 6.355  | 7.474  | 7.390  | 10.956 | protein phosphatase PPM5, putative                             |
| PVVCY_1001380 | 4.322  | 5.611  | 7.449  | 7.082  | 10.960 | DNA primase large subunit, putative                            |
| PVVCY_0701560 | 6.066  | 6.684  | 7.589  | 7.344  | 10.962 | 50S ribosomal protein L10, putative                            |
| PVVCY_1001390 | 3.283  | 4.127  | 5.955  | 5.721  | 10.965 | phosphatidylinositol N-acetylglucosaminyltransferase, putative |
| PVVCY_0903070 | 7.833  | 7.730  | 7.792  | 7.198  | 10.968 | ubiquitin-like protein, putative                               |
| PVVCY_0800760 | 6.285  | 6.536  | 7.040  | 6.547  | 10.973 | peptide chain release factor 2, putative                       |
| PVVCY_0401260 | 4.963  | 5.592  | 6.581  | 6.159  | 10.977 | conserved Plasmodium protein, unknown function                 |
| PVVCY_1003760 | 4.649  | 4.344  | 4.158  | 3.514  | 10.990 | WD repeat-containing protein, putative                         |
| PVVCY_0500750 | 6.272  | 6.188  | 6.720  | 5.978  | 10.991 | 4-hydroxy-3-methylbut-2-en-1-yl diphosphate synthase, putative |
| PVVCY_0200030 | 0.332  | 0.636  | 1.458  | 1.207  | 10.991 | PIR protein CIR protein                                        |
| PVVCY_0903240 | 6.067  | 5.872  | 5.955  | 5.464  | 10.996 | FHA domain-containing protein, putative                        |
| PVVCY_0500660 | 5.829  | 6.755  | 8.721  | 8.540  | 10.997 | PHAX domain-containing protein, putative                       |

|               |        |        |        |        |        |                                                     |
|---------------|--------|--------|--------|--------|--------|-----------------------------------------------------|
| PVVCY_0901320 | 7.401  | 7.378  | 7.719  | 7.312  | 11.001 | serine_threonine protein kinase, putative           |
| PVVCY_0101600 | 1.460  | 1.580  | 2.125  | 1.796  | 11.004 | CIR protein PIR protein                             |
| PVVCY_0601880 | 4.230  | 4.163  | 4.275  | 3.705  | 11.007 | conserved Plasmodium protein, unknown function      |
| PVVCY_1001960 | 3.593  | 4.002  | 4.614  | 4.458  | 11.008 | ADP-dependent DNA helicase RecQ, putative           |
| PVVCY_0700520 | 4.854  | 5.338  | 6.453  | 6.273  | 11.010 | conserved protein, unknown function                 |
| PVVCY_0600990 | 4.751  | 4.834  | 5.319  | 4.978  | 11.010 | conserved Plasmodium protein, unknown function      |
| PVVCY_1103360 | 5.144  | 5.589  | 6.763  | 6.444  | 11.012 | conserved Plasmodium protein, unknown function      |
| PVVCY_1000470 | 13.232 | 12.987 | 13.042 | 11.975 | 11.018 | 40S ribosomal protein S29, putative                 |
| PVVCY_1000190 | 6.770  | 7.040  | 7.862  | 7.559  | 11.023 | centrin, putative                                   |
| PVVCY_0100280 | 7.185  | 7.078  | 7.086  | 6.663  | 11.024 | conserved Plasmodium protein, unknown function      |
| PVVCY_1300290 | 7.563  | 7.515  | 7.855  | 7.406  | 11.027 | trailer hitch homolog, putative                     |
| PVVCY_1000610 | 5.493  | 5.692  | 6.233  | 5.516  | 11.032 | conserved Plasmodium protein, unknown function      |
| PVVCY_0401620 | 2.693  | 3.552  | 4.761  | 4.684  | 11.035 | conserved Plasmodium protein, unknown function      |
| PVVCY_0901990 | 3.038  | 4.302  | 6.141  | 5.879  | 11.037 | serine_threonine protein kinase, putative           |
| PVVCY_1201860 | 8.145  | 8.269  | 8.709  | 7.993  | 11.038 | ATP-dependent RNA helicase DDX6, putative           |
| PVVCY_0701280 | 8.354  | 8.559  | 9.758  | 8.952  | 11.045 | conserved Plasmodium protein, unknown function      |
| PVVCY_1304920 | 7.434  | 7.724  | 8.127  | 8.120  | 11.045 | protein tyrosine phosphatase-like protein, putative |
| PVVCY_0700440 | 6.287  | 6.008  | 5.942  | 5.445  | 11.045 | E3 ubiquitin-protein ligase, putative               |
| PVVCY_0901190 | 5.177  | 6.280  | 8.339  | 8.476  | 11.051 | UDP-galactose transporter, putative                 |
| PVVCY_1306820 | 9.639  | 10.149 | 11.516 | 11.162 | 11.055 | thioredoxin-related protein, putative               |
| PVVCY_0101450 | 1.308  | 1.653  | 2.989  | 2.336  | 11.058 | CIR protein PIR protein                             |
| PVVCY_0301690 | 4.371  | 5.263  | 7.063  | 7.049  | 11.066 | replication factor C subunit 1, putative            |
| PVVCY_1103500 | 4.454  | 4.660  | 5.253  | 5.073  | 11.069 | DNA helicase, putative                              |
| PVVCY_1305010 | 5.015  | 5.283  | 5.746  | 5.514  | 11.070 | apurinic_aprimidinic endonuclease Apn1, putative    |
| PVVCY_1300930 | 7.999  | 8.131  | 8.407  | 8.170  | 11.074 | dephospho-CoA kinase, putative                      |
| PVVCY_0903140 | 6.723  | 6.808  | 7.163  | 6.556  | 11.076 | 50S ribosomal protein L2, putative                  |
| PVVCY_1001640 | 4.190  | 5.081  | 6.931  | 6.871  | 11.076 | chromatin assembly factor 1 P55 subunit, putative   |

|               |       |       |        |        |        |                                                                          |
|---------------|-------|-------|--------|--------|--------|--------------------------------------------------------------------------|
| PVVCY_0501670 | 3.405 | 4.281 | 6.080  | 6.042  | 11.076 | phosphatidylinositol N-acetylglucosaminyltransferase subunit A, putative |
| PVVCY_1104160 | 5.115 | 5.377 | 5.973  | 5.388  | 11.078 | aldehyde reductase, putative                                             |
| PVVCY_1104670 | 6.296 | 6.349 | 6.634  | 6.107  | 11.085 | U2 small nuclear ribonucleoprotein A', putative                          |
| PVVCY_1203770 | 6.979 | 7.032 | 7.366  | 6.715  | 11.086 | transcription initiation factor TFIID subunit 10, putative               |
| PVVCY_0200630 | 5.261 | 6.224 | 7.840  | 7.167  | 11.089 | ras-related protein Rab-5C, putative                                     |
| PVVCY_0300670 | 3.496 | 4.310 | 5.430  | 5.479  | 11.091 | ribosome-recycling factor, putative                                      |
| PVVCY_0500440 | 2.971 | 4.165 | 5.901  | 5.743  | 11.091 | conserved Plasmodium protein, unknown function                           |
| PVVCY_0700530 | 4.840 | 5.598 | 6.612  | 6.734  | 11.093 | translation initiation factor IF-3, putative                             |
| PVVCY_0301740 | 0.499 | 0.712 | 1.412  | 1.152  | 11.094 | PIR protein CIR protein                                                  |
| PVVCY_0802360 | 5.350 | 5.459 | 5.797  | 5.684  | 11.095 | proline--tRNA ligase, putative                                           |
| PVVCY_1401310 | 7.826 | 8.027 | 8.390  | 8.194  | 11.106 | eukaryotic translation initiation factor 4 gamma, putative               |
| PVVCY_1102470 | 3.451 | 4.769 | 6.752  | 6.456  | 11.110 | N-acetylglucosaminylphosphatidylinositol deacetylase, putative           |
| PVVCY_1102390 | 4.225 | 5.248 | 6.756  | 6.605  | 11.113 | ribonuclease H2 subunit A, putative                                      |
| PVVCY_1200210 | 6.697 | 7.117 | 7.992  | 7.333  | 11.124 | conserved Plasmodium protein, unknown function                           |
| PVVCY_1104950 | 0.262 | 0.628 | 1.381  | 0.828  | 11.126 | PIR protein CIR protein                                                  |
| PVVCY_1200730 | 2.865 | 4.112 | 5.910  | 5.860  | 11.129 | AP-5 complex subunit sigma-1, putative                                   |
| PVVCY_0100540 | 4.071 | 4.871 | 6.148  | 5.833  | 11.136 | serine threonine protein kinase, putative                                |
| PVVCY_1303490 | 5.603 | 5.894 | 6.291  | 6.333  | 11.137 | shewanella-like protein phosphatase 1, putative                          |
| PVVCY_0300280 | 5.475 | 5.706 | 6.197  | 5.821  | 11.140 | conserved Plasmodium protein, unknown function                           |
| PVVCY_1001450 | 5.851 | 6.851 | 8.257  | 8.316  | 11.142 | conserved Plasmodium protein, unknown function                           |
| PVVCY_0600730 | 0.925 | 1.094 | 1.495  | 1.449  | 11.152 | conserved Plasmodium protein, unknown function                           |
| PVVCY_1000220 | 3.909 | 4.680 | 5.903  | 5.649  | 11.159 | conserved Plasmodium protein, unknown function                           |
| PVVCY_1402690 | 8.881 | 8.920 | 9.590  | 9.048  | 11.160 | karyopherin alpha, putative                                              |
| PVVCY_0903500 | 9.433 | 9.574 | 9.914  | 9.609  | 11.161 | casein kinase 1, putative                                                |
| PVVCY_0901760 | 5.389 | 5.547 | 5.947  | 5.562  | 11.169 | ubiquitin-protein ligase, putative                                       |
| PVVCY_0802780 | 7.848 | 8.980 | 11.624 | 11.377 | 11.170 | high molecular weight rhoptry protein 2, putative                        |
| PVVCY_0300990 | 2.078 | 3.020 | 5.133  | 5.009  | 11.173 | conserved Plasmodium protein, unknown function                           |

|               |       |       |        |       |        |                                                                       |
|---------------|-------|-------|--------|-------|--------|-----------------------------------------------------------------------|
| PVVCY_0700410 | 6.036 | 6.270 | 6.906  | 6.774 | 11.178 | dehydrodolichyl diphosphate synthetase, putative                      |
| PVVCY_1400440 | 2.850 | 3.660 | 5.208  | 5.349 | 11.179 | CorA-like Mg <sup>2+</sup> transporter protein, putative              |
| PVVCY_1200620 | 5.147 | 5.767 | 6.799  | 6.529 | 11.194 | rhoGAP GTPase, putative                                               |
| PVVCY_0600030 | 0.749 | 1.255 | 2.501  | 2.346 | 11.195 | PIR protein CIR protein                                               |
| PVVCY_0701820 | 4.220 | 5.077 | 7.019  | 6.911 | 11.199 | histone acetyltransferase, putative                                   |
| PVVCY_1400640 | 5.984 | 6.587 | 8.156  | 7.910 | 11.216 | conserved Plasmodium protein, unknown function                        |
| PVVCY_0600130 | 6.212 | 6.966 | 8.244  | 7.906 | 11.224 | mitochondrial phosphate carrier protein, putative                     |
| PVVCY_1301900 | 7.563 | 7.447 | 7.692  | 6.825 | 11.224 | glucose-6-phosphate dehydrogenase-6-phosphogluconolactonase, putative |
| PVVCY_1306250 | 6.969 | 6.730 | 6.505  | 6.236 | 11.225 | conserved Plasmodium protein, unknown function                        |
| PVVCY_0502020 | 4.501 | 5.385 | 6.953  | 6.418 | 11.227 | acetyl-CoA transporter, putative                                      |
| PVVCY_0903410 | 3.225 | 3.384 | 3.838  | 3.387 | 11.228 | condensin-2 complex subunit D3, putative                              |
| PVVCY_1100630 | 9.722 | 9.883 | 10.579 | 9.634 | 11.228 | small ubiquitin-related modifier, putative                            |
| PVVCY_0600840 | 5.642 | 5.857 | 6.581  | 6.359 | 11.244 | conserved Plasmodium protein, unknown function                        |
| PVVCY_0501830 | 6.953 | 6.967 | 7.231  | 6.730 | 11.245 | Sec1 family protein, putative                                         |
| PVVCY_0401680 | 6.270 | 6.748 | 7.653  | 7.256 | 11.245 | autophagy-related protein 3, putative                                 |
| PVVCY_1300050 | 0.571 | 0.961 | 1.598  | 1.482 | 11.245 | PIR protein CIR protein                                               |
| PVVCY_0201660 | 0.322 | 0.574 | 1.484  | 1.175 | 11.250 | PIR protein CIR protein                                               |
| PVVCY_1100250 | 4.380 | 5.156 | 6.913  | 6.854 | 11.255 | chromosome assembly factor 1, putative                                |
| PVVCY_0400660 | 2.164 | 3.028 | 4.499  | 4.850 | 11.262 | conserved Plasmodium protein, unknown function                        |
| PVVCY_1003200 | 6.358 | 6.516 | 6.924  | 6.583 | 11.268 | conserved Plasmodium protein, unknown function                        |
| PVVCY_0402110 | 0.886 | 1.038 | 1.570  | 1.401 | 11.270 | CIR protein PIR protein                                               |
| PVVCY_0500090 | 0.524 | 0.923 | 1.730  | 1.327 | 11.277 | PIR protein CIR protein                                               |
| PVVCY_0901880 | 7.793 | 7.472 | 8.161  | 6.997 | 11.277 | conserved Plasmodium protein, unknown function                        |
| PVVCY_0401310 | 4.149 | 4.331 | 4.859  | 4.753 | 11.282 | conserved Plasmodium protein, unknown function                        |
| PVVCY_1103020 | 2.375 | 3.561 | 5.515  | 5.201 | 11.284 | DNA polymerase epsilon catalytic subunit A, putative                  |
| PVVCY_0801340 | 4.529 | 5.359 | 6.627  | 6.613 | 11.294 | type II NADH:ubiquinone oxidoreductase, putative                      |
| PVVCY_1001970 | 7.251 | 7.163 | 7.375  | 6.711 | 11.298 | coatamer protein, beta subunit, putative                              |

|               |        |        |        |        |        |                                                                                       |
|---------------|--------|--------|--------|--------|--------|---------------------------------------------------------------------------------------|
| PVVCY_1402510 | 14.088 | 13.666 | 13.378 | 12.701 | 11.301 | DNA_RNA-binding protein Alba 1, putative                                              |
| PVVCY_0803190 | 2.998  | 4.028  | 5.728  | 5.483  | 11.305 | gamma-tubulin complex component, putative                                             |
| PVVCY_1406200 | 4.977  | 5.901  | 7.124  | 7.483  | 11.307 | signal recognition particle, beta subunit, putative                                   |
| PVVCY_0201060 | 6.373  | 6.554  | 7.113  | 6.580  | 11.308 | dolichyl-diphosphooligosaccharide--protein glycosyltransferase subunit DAD1, putative |
| PVVCY_1402380 | 5.637  | 5.370  | 5.391  | 4.583  | 11.311 | conserved Plasmodium protein, unknown function                                        |
| PVVCY_0601890 | 9.671  | 9.820  | 10.257 | 9.867  | 11.313 | conserved Plasmodium protein, unknown function                                        |
| PVVCY_1302490 | 8.769  | 8.795  | 9.248  | 8.927  | 11.314 | bax inhibitor 1, putative                                                             |
| PVVCY_1403290 | 3.122  | 3.765  | 4.951  | 4.572  | 11.314 | conserved Plasmodium protein, unknown function                                        |
| PVVCY_0401780 | 6.638  | 7.463  | 8.670  | 8.779  | 11.315 | bacterial histone-like protein, putative                                              |
| PVVCY_1304780 | 5.922  | 6.025  | 6.459  | 5.944  | 11.321 | conserved Plasmodium protein, unknown function                                        |
| PVVCY_1306190 | 4.390  | 5.354  | 7.519  | 7.516  | 11.324 | kinetochore protein SPC25, putative                                                   |
| PVVCY_0903820 | 5.289  | 5.142  | 5.318  | 4.570  | 11.325 | conserved Plasmodium protein, unknown function                                        |
| PVVCY_0500710 | 6.413  | 6.935  | 8.020  | 7.507  | 11.332 | serine_arginine-rich splicing factor 4, putative                                      |
| PVVCY_1302390 | 3.954  | 5.058  | 6.786  | 6.751  | 11.339 | exonuclease V, mitochondrial, putative                                                |
| PVVCY_1002890 | 5.124  | 5.374  | 6.269  | 6.007  | 11.342 | thioredoxin-like protein, putative                                                    |
| PVVCY_1000720 | 3.966  | 3.824  | 4.073  | 3.220  | 11.343 | conserved Plasmodium protein, unknown function                                        |
| PVVCY_1203380 | 5.469  | 5.477  | 5.919  | 5.146  | 11.351 | RAP protein, putative                                                                 |
| PVVCY_0904340 | 7.241  | 7.231  | 7.591  | 6.916  | 11.352 | coatomer subunit gamma, putative                                                      |
| PVVCY_1202590 | 6.223  | 7.212  | 9.287  | 9.427  | 11.365 | serine_threonine protein kinase, FIKK family                                          |
| PVVCY_1302860 | 4.544  | 6.042  | 8.648  | 8.187  | 11.366 | fam-a protein                                                                         |
| PVVCY_1402990 | 6.736  | 6.753  | 7.472  | 6.945  | 11.371 | histone acetyltransferase subunit NuA4, putative                                      |
| PVVCY_1401710 | 6.078  | 6.246  | 6.662  | 6.393  | 11.373 | U4_U6.U5 tri-snRNP-associated protein 2, putative                                     |
| PVVCY_0803390 | 4.756  | 5.676  | 8.068  | 7.848  | 11.376 | cytoadherence linked asexual protein 9, putative                                      |
| PVVCY_1400470 | 2.983  | 2.968  | 4.698  | 3.338  | 11.381 | small heat shock protein, putative                                                    |
| PVVCY_1203300 | 9.942  | 9.743  | 9.782  | 9.400  | 11.390 | serine_arginine-rich splicing factor 1, putative                                      |
| PVVCY_1202250 | 6.258  | 6.335  | 6.842  | 6.186  | 11.406 | cell division cycle ATPase, putative                                                  |
| PVVCY_0601000 | 2.053  | 2.883  | 4.305  | 4.136  | 11.413 | DNA helicase MCM8, putative                                                           |

|               |       |       |        |        |        |                                                              |
|---------------|-------|-------|--------|--------|--------|--------------------------------------------------------------|
| PVVCY_1004150 | 5.067 | 5.150 | 5.475  | 5.153  | 11.419 | conserved Plasmodium protein, unknown function               |
| PVVCY_0602380 | 7.067 | 8.315 | 10.256 | 10.347 | 11.423 | tryptophan-rich antigen tryptophan-rich protein              |
| PVVCY_0601360 | 3.614 | 4.855 | 7.073  | 6.689  | 11.427 | conserved Plasmodium protein, unknown function               |
| PVVCY_1001590 | 2.254 | 3.166 | 4.763  | 4.539  | 11.431 | conserved Plasmodium protein, unknown function               |
| PVVCY_0803490 | 0.639 | 0.772 | 1.888  | 1.291  | 11.433 | PIR protein CIR protein                                      |
| PVVCY_0903380 | 2.559 | 3.236 | 4.543  | 4.181  | 11.434 | regulator of chromosome condensation, putative               |
| PVVCY_1400020 | 1.389 | 1.603 | 2.310  | 2.159  | 11.434 | CIR protein PIR protein                                      |
| PVVCY_0902390 | 4.901 | 5.917 | 8.610  | 8.391  | 11.439 | kelch domain-containing protein, putative                    |
| PVVCY_0800190 | 3.819 | 4.484 | 6.248  | 6.105  | 11.443 | SET domain protein, putative                                 |
| PVVCY_0401270 | 2.147 | 2.205 | 2.695  | 2.437  | 11.444 | conserved Plasmodium protein, unknown function               |
| PVVCY_0100200 | 8.646 | 9.153 | 10.480 | 9.652  | 11.445 | schizont membrane associated cytoadherence protein, putative |
| PVVCY_0101040 | 7.241 | 6.990 | 7.997  | 6.827  | 11.452 | conserved Plasmodium protein, unknown function               |
| PVVCY_1300860 | 3.269 | 3.850 | 5.384  | 5.274  | 11.460 | serine threonine protein kinase, putative                    |
| PVVCY_1002410 | 4.337 | 5.182 | 6.512  | 6.585  | 11.464 | conserved Plasmodium protein, unknown function               |
| PVVCY_0801680 | 1.437 | 1.515 | 2.198  | 1.837  | 11.465 | conserved Plasmodium protein, unknown function               |
| PVVCY_1401060 | 7.461 | 7.166 | 7.585  | 6.162  | 11.472 | conserved Plasmodium protein, unknown function               |
| PVVCY_1203560 | 5.927 | 6.264 | 6.889  | 6.772  | 11.476 | conserved Plasmodium protein, unknown function               |
| PVVCY_0701810 | 1.319 | 2.240 | 3.942  | 3.643  | 11.483 | DNA helicase MCM9, putative                                  |
| PVVCY_0501610 | 2.609 | 3.617 | 5.233  | 5.296  | 11.486 | conserved Plasmodium protein, unknown function               |
| PVVCY_1400230 | 8.006 | 9.347 | 11.763 | 11.435 | 11.487 | cytoadherence linked asexual protein 9, putative             |
| PVVCY_1204680 | 5.406 | 5.238 | 5.279  | 4.963  | 11.488 | conserved Plasmodium protein, unknown function               |
| PVVCY_1405150 | 6.820 | 6.606 | 6.767  | 6.287  | 11.494 | splicing factor 3B subunit 3, putative                       |
| PVVCY_0904580 | 3.636 | 4.075 | 5.014  | 4.686  | 11.498 | conserved Plasmodium protein, unknown function               |
| PVVCY_0501210 | 7.846 | 7.593 | 7.929  | 6.773  | 11.499 | conserved Plasmodium protein, unknown function               |
| PVVCY_0401190 | 6.804 | 6.793 | 7.091  | 6.608  | 11.501 | ubiquitin-protein ligase, putative                           |
| PVVCY_1003840 | 1.895 | 1.945 | 2.353  | 1.859  | 11.504 | conserved Plasmodium protein, unknown function               |
| PVVCY_0201020 | 3.988 | 4.514 | 5.932  | 5.836  | 11.518 | DNA mismatch repair protein PMS1, putative                   |

|               |        |        |        |        |        |                                                              |
|---------------|--------|--------|--------|--------|--------|--------------------------------------------------------------|
| PVVCY_0800920 | 3.502  | 3.913  | 4.857  | 4.901  | 11.532 | conserved Plasmodium protein, unknown function               |
| PVVCY_0800160 | 3.527  | 4.557  | 6.936  | 7.042  | 11.539 | conserved Plasmodium protein, unknown function               |
| PVVCY_1305320 | 11.514 | 11.538 | 12.019 | 11.733 | 11.555 | conserved Plasmodium protein, unknown function               |
| PVVCY_1400780 | 6.798  | 6.924  | 7.706  | 7.390  | 11.564 | DNA-directed RNA polymerase alpha chain, putative            |
| PVVCY_1200180 | 2.713  | 3.176  | 4.868  | 4.508  | 11.573 | DnaJ protein, putative                                       |
| PVVCY_0300810 | 3.464  | 4.285  | 6.096  | 6.259  | 11.580 | conserved Plasmodium protein, unknown function               |
| PVVCY_1306760 | 6.788  | 6.865  | 7.303  | 7.140  | 11.584 | conserved Plasmodium protein, unknown function               |
| PVVCY_0701700 | 2.497  | 3.324  | 5.195  | 5.335  | 11.598 | conserved Plasmodium protein, unknown function               |
| PVVCY_1300750 | 8.343  | 8.030  | 8.625  | 7.717  | 11.600 | RNA polymerase II transcription factor B subunit 5, putative |
| PVVCY_0500590 | 4.258  | 4.979  | 6.568  | 6.726  | 11.618 | conserved Plasmodium protein, unknown function               |
| PVVCY_0100370 | 3.752  | 4.555  | 6.547  | 6.607  | 11.670 | cation_H+ antiporter, putative                               |
| PVVCY_1203910 | 4.750  | 5.541  | 7.212  | 7.458  | 11.683 | conserved Plasmodium protein, unknown function               |
| PVVCY_0601040 | 5.844  | 6.613  | 9.073  | 8.804  | 11.693 | DNA replication licensing factor MCM5, putative              |
| PVVCY_0201420 | 5.836  | 6.695  | 8.237  | 8.677  | 11.696 | conserved Plasmodium protein, unknown function               |
| PVVCY_1102960 | 4.758  | 4.947  | 5.619  | 5.514  | 11.701 | SET domain protein, putative                                 |
| PVVCY_1003950 | 4.915  | 5.164  | 6.088  | 5.930  | 11.720 | DNA repair helicase, putative                                |
| PVVCY_0201490 | 6.707  | 6.968  | 8.545  | 8.014  | 11.724 | fam-a protein                                                |
| PVVCY_0500610 | 6.770  | 6.636  | 7.050  | 6.593  | 11.753 | endomembrane protein 70, putative                            |
| PVVCY_1400180 | 5.944  | 6.410  | 7.883  | 7.757  | 11.758 | acyl-CoA synthetase, putative                                |
| PVVCY_0601610 | 3.154  | 3.911  | 5.895  | 5.934  | 11.764 | exported serine/threonine protein kinase, putative           |
| PVVCY_1004630 | 2.046  | 2.153  | 3.125  | 2.727  | 11.766 | CIR protein PIR protein                                      |
| PVVCY_0200130 | 4.606  | 5.550  | 8.156  | 8.148  | 11.797 | Plasmodium exported protein, unknown function                |
| PVVCY_1002180 | 6.130  | 6.635  | 8.941  | 8.423  | 11.807 | conserved Plasmodium protein, unknown function               |
| PVVCY_1001810 | 2.595  | 3.084  | 4.884  | 4.638  | 11.828 | mitogen-activated protein kinase 1, putative                 |
| PVVCY_1405000 | 2.330  | 2.421  | 3.529  | 3.060  | 11.858 | conserved Plasmodium protein, unknown function               |
| PVVCY_1304810 | 8.246  | 8.288  | 9.376  | 8.851  | 11.874 | ER lumen protein retaining receptor 1, putative              |
| PVVCY_1403220 | 8.441  | 8.122  | 8.372  | 7.756  | 11.933 | ER membrane protein complex subunit 6, putative              |

|               |        |        |        |        |        |                                                                |
|---------------|--------|--------|--------|--------|--------|----------------------------------------------------------------|
| PVVCY_1000500 | 4.226  | 4.525  | 5.514  | 5.453  | 11.934 | conserved Plasmodium protein, unknown function                 |
| PVVCY_1306680 | 1.908  | 2.594  | 4.713  | 4.654  | 11.941 | phosphatidylinositol transfer protein, putative                |
| PVVCY_1200040 | 0.000  | 0.260  | 1.747  | 1.377  | 11.959 | CIR protein PIR protein                                        |
| PVVCY_1304700 | 4.638  | 5.320  | 7.428  | 7.383  | 11.972 | chromatin assembly factor 1 subunit, putative                  |
| PVVCY_1302440 | 4.465  | 5.161  | 6.010  | 6.629  | 11.990 | OPA3-like protein, putative                                    |
| PVVCY_1100600 | 5.650  | 5.871  | 7.167  | 6.870  | 12.055 | DNA mismatch repair protein MSH6, putative                     |
| PVVCY_0800740 | 1.828  | 2.482  | 4.164  | 4.323  | 12.059 | conserved Plasmodium protein, unknown function                 |
| PVVCY_0602460 | 1.110  | 0.951  | 1.799  | 1.156  | 12.060 | fam-c protein                                                  |
| PVVCY_0801590 | 3.923  | 4.638  | 7.004  | 6.945  | 12.100 | conserved Plasmodium protein, unknown function                 |
| PVVCY_1305170 | 7.536  | 8.258  | 11.017 | 10.795 | 12.118 | MSP7-like protein                                              |
| PVVCY_1202390 | 6.421  | 6.221  | 6.622  | 6.151  | 12.170 | conserved Plasmodium protein, unknown function                 |
| PVVCY_1202280 | 6.619  | 5.984  | 6.052  | 5.105  | 12.185 | conserved Plasmodium protein, unknown function                 |
| PVVCY_0800040 | 4.234  | 5.207  | 7.833  | 8.077  | 12.195 | fam-b protein                                                  |
| PVVCY_1301660 | 4.053  | 4.755  | 6.944  | 6.992  | 12.202 | E3 SUMO-protein ligase NSE2, putative                          |
| PVVCY_1200090 | 5.888  | 6.465  | 7.896  | 8.099  | 12.207 | fam-c protein                                                  |
| PVVCY_1000870 | 7.314  | 6.968  | 7.340  | 6.682  | 12.209 | DNA-directed RNA polymerase II subunit RPB1, putative          |
| PVVCY_0803410 | 0.908  | 1.049  | 2.187  | 1.898  | 12.225 | CIR protein PIR protein                                        |
| PVVCY_1306070 | 5.446  | 5.390  | 5.795  | 5.543  | 12.255 | conserved Plasmodium protein, unknown function                 |
| PVVCY_0601530 | 5.852  | 5.771  | 6.353  | 6.000  | 12.315 | transcription initiation factor IIE subunit alpha, putative    |
| PVVCY_0601830 | 7.023  | 7.321  | 7.893  | 8.079  | 12.319 | conserved Plasmodium protein, unknown function                 |
| PVVCY_0902150 | 7.713  | 7.471  | 7.772  | 7.310  | 12.319 | conserved Plasmodium protein, unknown function                 |
| PVVCY_1403270 | 7.754  | 7.840  | 8.173  | 8.159  | 12.321 | conserved Plasmodium protein, unknown function                 |
| PVVCY_0900940 | 4.810  | 5.365  | 7.348  | 7.324  | 12.324 | actin-like protein, putative                                   |
| PVVCY_0300790 | 9.865  | 9.959  | 10.341 | 10.318 | 12.325 | Sec61-gamma subunit of protein translocation complex, putative |
| PVVCY_0701170 | 12.356 | 12.010 | 12.141 | 11.602 | 12.331 | heat shock protein 70, putative                                |
| PVVCY_1405990 | 7.998  | 7.732  | 7.850  | 7.428  | 12.335 | ADP-ribosylation factor GTPase-activating protein, putative    |
| PVVCY_0801200 | 4.714  | 4.432  | 4.833  | 4.277  | 12.340 | conserved Plasmodium protein, unknown function                 |



|               |        |        |        |        |        |                                                               |
|---------------|--------|--------|--------|--------|--------|---------------------------------------------------------------|
| PVVCY_0100650 | 7.259  | 6.921  | 6.940  | 6.459  | 12.341 | polypyrimidine tract-binding protein, putative                |
| PVVCY_1201630 | 11.165 | 11.358 | 12.387 | 12.244 | 12.345 | translation machinery-associated protein 7, putative          |
| PVVCY_0800750 | 5.876  | 5.916  | 6.980  | 6.620  | 12.379 | replication protein A1, large subunit, putative               |
| PVVCY_1203900 | 4.172  | 4.533  | 5.322  | 5.517  | 12.389 | dynein light chain Tctex-type, putative                       |
| PVVCY_0900800 | 7.773  | 7.879  | 8.441  | 8.370  | 12.392 | heat shock protein, putative                                  |
| PVVCY_0400240 | 7.269  | 7.266  | 7.850  | 7.622  | 12.416 | HAD superfamily protein, putative                             |
| PVVCY_1306550 | 4.246  | 5.000  | 6.957  | 7.253  | 12.421 | conserved Plasmodium protein, unknown function                |
| PVVCY_1001240 | 7.435  | 7.089  | 7.473  | 6.856  | 12.454 | exoribonuclease, putative                                     |
| PVVCY_0400990 | 6.545  | 6.184  | 6.133  | 5.655  | 12.455 | pre-mRNA splicing factor, putative                            |
| PVVCY_1406480 | 5.484  | 5.401  | 6.032  | 5.683  | 12.460 | THO complex subunit 2, putative                               |
| PVVCY_0101390 | 7.499  | 7.954  | 9.633  | 9.646  | 12.505 | fam-b protein                                                 |
| PVVCY_0800340 | 7.031  | 6.671  | 7.238  | 6.547  | 12.520 | pre-mRNA-processing-splicing factor 8, putative               |
| PVVCY_0901610 | 3.608  | 4.208  | 5.974  | 6.163  | 12.542 | DNA mismatch repair protein MLH, putative                     |
| PVVCY_1204180 | 5.442  | 5.487  | 5.907  | 5.821  | 12.559 | nucleolar Jumonji domain interacting protein, putative        |
| PVVCY_0501990 | 0.860  | 1.242  | 2.619  | 2.655  | 12.564 | conserved Plasmodium protein, unknown function                |
| PVVCY_1104490 | 2.666  | 3.453  | 6.349  | 6.410  | 12.579 | conserved Plasmodium protein, unknown function                |
| PVVCY_0701550 | 5.738  | 6.072  | 7.669  | 7.577  | 12.612 | lysine decarboxylase-like protein, putative                   |
| PVVCY_1300870 | 6.137  | 6.601  | 7.971  | 8.129  | 12.614 | conserved Plasmodium protein, unknown function                |
| PVVCY_0800640 | 4.687  | 5.178  | 7.283  | 7.238  | 12.638 | flap endonuclease 1, putative                                 |
| PVVCY_1306300 | 1.376  | 1.715  | 2.803  | 2.895  | 12.648 | WD repeat-containing protein 92, putative                     |
| PVVCY_0301420 | 6.080  | 6.173  | 7.150  | 6.957  | 12.678 | MtN3-like protein                                             |
| PVVCY_0601350 | 3.687  | 4.277  | 6.877  | 6.840  | 12.733 | DNA polymerase alpha catalytic subunit A, putative            |
| PVVCY_1100810 | 7.649  | 7.386  | 7.820  | 7.341  | 12.744 | cell differentiation protein, putative                        |
| PVVCY_0201480 | 5.705  | 6.182  | 8.453  | 8.380  | 12.760 | heat shock protein, putative                                  |
| PVVCY_0903870 | 2.483  | 3.034  | 5.315  | 5.339  | 12.770 | P-loop containing nucleoside triphosphate hydrolase, putative |
| PVVCY_0800350 | 6.837  | 6.568  | 6.350  | 6.066  | 12.784 | conserved Plasmodium protein, unknown function                |
| PVVCY_0701620 | 0.796  | 0.774  | 1.519  | 1.269  | 12.808 | conserved Plasmodium protein, unknown function                |

|               |        |        |        |        |        |                                                          |
|---------------|--------|--------|--------|--------|--------|----------------------------------------------------------|
| PVVCY_0904480 | 3.998  | 4.507  | 6.678  | 6.696  | 12.817 | CCAAT-box DNA binding protein subunit B, putative        |
| PVVCY_1400860 | 3.445  | 3.574  | 4.832  | 4.631  | 12.833 | conserved Plasmodium protein, unknown function           |
| PVVCY_1306520 | 2.344  | 2.715  | 4.870  | 4.720  | 12.836 | tyrosine kinase-like protein, putative                   |
| PVVCY_0602080 | 5.379  | 5.374  | 6.003  | 5.812  | 12.839 | tRNA <sup>His</sup> guanylyltransferase, putative        |
| PVVCY_0301280 | 6.344  | 6.500  | 7.325  | 7.289  | 12.859 | hypothetical protein                                     |
| PVVCY_0902990 | 4.010  | 4.470  | 5.934  | 6.119  | 12.929 | conserved Plasmodium protein, unknown function           |
| PVVCY_0200220 | 3.911  | 4.508  | 6.471  | 6.700  | 12.952 | conserved Plasmodium protein, unknown function           |
| PVVCY_1101310 | 7.950  | 8.006  | 8.759  | 8.627  | 12.954 | ras-related protein Rab-1B, putative                     |
| PVVCY_1004100 | 6.301  | 5.965  | 5.877  | 5.475  | 12.961 | ATP-dependent Clp protease, putative                     |
| PVVCY_1002400 | 2.518  | 2.900  | 4.439  | 4.516  | 12.980 | DEAD_DEAH box helicase, putative                         |
| PVVCY_1104580 | 6.427  | 6.321  | 6.853  | 6.581  | 13.012 | conserved Plasmodium protein, unknown function           |
| PVVCY_0602170 | 7.374  | 7.148  | 7.122  | 6.845  | 13.016 | RNA-binding protein, putative                            |
| PVVCY_1200120 | 4.568  | 5.071  | 8.485  | 8.253  | 13.047 | Plasmodium exported protein, unknown function            |
| PVVCY_0601330 | 3.649  | 3.829  | 5.180  | 5.065  | 13.052 | conserved Plasmodium protein, unknown function           |
| PVVCY_1300490 | 0.633  | 0.627  | 1.379  | 1.183  | 13.054 | conserved Plasmodium protein, unknown function           |
| PVVCY_1004240 | 6.798  | 6.254  | 7.014  | 6.145  | 13.064 | trafficking protein particle complex subunit 1, putative |
| PVVCY_1101780 | 11.160 | 11.638 | 13.178 | 13.392 | 13.075 | histone H2A, putative                                    |
| PVVCY_0201410 | 6.550  | 6.988  | 8.120  | 8.387  | 13.091 | transcription factor with AP2 domain(s), putative        |
| PVVCY_1302360 | 3.542  | 4.168  | 7.094  | 7.156  | 13.093 | aminodeoxychorismate lyase, putative                     |
| PVVCY_1002810 | 7.747  | 7.486  | 7.760  | 7.370  | 13.101 | splicing factor 3B subunit 4, putative                   |
| PVVCY_1404750 | 8.738  | 8.317  | 8.761  | 8.133  | 13.124 | protein transport protein SEC13, putative                |
| PVVCY_0701610 | 6.814  | 6.648  | 7.323  | 6.957  | 13.129 | Rab5-interacting protein, putative                       |
| PVVCY_1101470 | 5.200  | 4.978  | 4.837  | 4.596  | 13.171 | conserved Plasmodium protein, unknown function           |
| PVVCY_1306730 | 6.995  | 7.094  | 8.661  | 8.422  | 13.180 | glycerol kinase, putative                                |
| PVVCY_1404410 | 3.838  | 4.137  | 5.608  | 5.637  | 13.181 | potassium channel, putative                              |
| PVVCY_1302370 | 2.459  | 3.036  | 5.274  | 5.474  | 13.199 | spindle assembly abnormal protein 4, putative            |
| PVVCY_0900650 | 0.849  | 0.934  | 1.810  | 1.716  | 13.212 | nucleic acid binding protein, putative                   |

|               |        |       |        |        |        |                                                              |
|---------------|--------|-------|--------|--------|--------|--------------------------------------------------------------|
| PVVCY_1402420 | 8.183  | 7.985 | 8.506  | 8.151  | 13.260 | importin beta, putative                                      |
| PVVCY_1202780 | 2.768  | 3.186 | 5.726  | 5.690  | 13.279 | DNA repair and recombination protein RAD54, putative         |
| PVVCY_1403060 | 6.697  | 6.565 | 7.212  | 6.918  | 13.318 | conserved protein, unknown function                          |
| PVVCY_0401920 | 2.845  | 3.490 | 6.204  | 6.418  | 13.318 | conserved Plasmodium protein, unknown function               |
| PVVCY_0400540 | 7.273  | 7.397 | 8.661  | 8.550  | 13.332 | FAD-dependent glycerol-3-phosphate dehydrogenase, putative   |
| PVVCY_0602400 | 9.173  | 9.152 | 10.036 | 9.832  | 13.344 | lysophospholipase, putative                                  |
| PVVCY_1202600 | 3.855  | 4.328 | 5.320  | 5.687  | 13.349 | conserved Plasmodium protein, unknown function               |
| PVVCY_0901930 | 3.247  | 3.882 | 6.859  | 7.018  | 13.350 | tyrosine kinase-like protein, putative                       |
| PVVCY_1102330 | 3.034  | 3.608 | 6.490  | 6.596  | 13.355 | EGF-like membrane protein, putative                          |
| PVVCY_0900680 | 5.688  | 5.881 | 7.611  | 7.496  | 13.369 | DNA repair protein RAD51, putative                           |
| PVVCY_1403080 | 4.876  | 5.167 | 6.596  | 6.660  | 13.373 | iron-sulfur subunit of succinate dehydrogenase, putative     |
| PVVCY_1403690 | 7.586  | 7.384 | 7.874  | 7.534  | 13.379 | clathrin heavy chain, putative                               |
| PVVCY_0701190 | 6.511  | 6.549 | 7.330  | 7.228  | 13.443 | DNA helicase, putative                                       |
| PVVCY_0501050 | 6.388  | 6.451 | 7.586  | 7.454  | 13.496 | conserved Plasmodium protein, unknown function               |
| PVVCY_0701770 | 7.002  | 6.640 | 7.110  | 6.600  | 13.508 | RNA-binding protein, putative                                |
| PVVCY_1004460 | 4.662  | 5.083 | 6.615  | 6.851  | 13.595 | conserved Plasmodium protein, unknown function               |
| PVVCY_0700950 | 4.633  | 4.962 | 6.350  | 6.512  | 13.658 | protein kinase 1, putative                                   |
| PVVCY_1103110 | 6.334  | 6.130 | 6.116  | 5.886  | 13.773 | Ran-binding protein, putative                                |
| PVVCY_1303200 | 4.067  | 4.402 | 7.018  | 7.028  | 13.775 | protein phosphatase containing kelch-like domains, putative  |
| PVVCY_0401850 | 7.575  | 7.565 | 8.887  | 8.690  | 13.790 | GTPase-activating protein, putative                          |
| PVVCY_0800820 | 7.711  | 7.476 | 8.061  | 7.713  | 13.800 | protein phosphatase PPM1, putative                           |
| PVVCY_1303610 | 3.952  | 4.221 | 6.344  | 6.358  | 13.812 | mitochondrial pyruvate carrier protein 2, putative           |
| PVVCY_1102400 | 10.292 | 9.993 | 9.869  | 9.546  | 13.816 | hexokinase, putative                                         |
| PVVCY_0101020 | 8.897  | 9.307 | 11.214 | 11.419 | 13.817 | histone H3, putative                                         |
| PVVCY_1404510 | 4.378  | 4.628 | 7.283  | 7.204  | 13.817 | NIMA related kinase 1, putative                              |
| PVVCY_1204250 | 5.552  | 5.904 | 8.661  | 8.704  | 13.877 | DNA replication licensing factor MCM3, putative              |
| PVVCY_0601060 | 8.789  | 8.782 | 9.187  | 9.126  | 13.882 | glutathione peroxidase-like thioredoxin peroxidase, putative |

|               |        |        |        |        |        |                                                               |
|---------------|--------|--------|--------|--------|--------|---------------------------------------------------------------|
| PVVCY_0601180 | 3.942  | 4.417  | 7.150  | 7.338  | 13.890 | conserved Plasmodium protein, unknown function                |
| PVVCY_0904620 | 3.278  | 3.631  | 6.601  | 6.623  | 13.898 | serine_threonine protein kinase, putative                     |
| PVVCY_1405700 | 4.017  | 3.883  | 4.616  | 4.373  | 13.904 | RNA-binding protein, putative                                 |
| PVVCY_0802570 | 5.454  | 5.545  | 5.976  | 6.025  | 13.915 | fumarate hydratase, putative                                  |
| PVVCY_0900470 | 7.418  | 7.481  | 8.400  | 8.364  | 13.983 | conserved Plasmodium protein, unknown function                |
| PVVCY_1101930 | 2.128  | 2.452  | 4.561  | 4.692  | 14.038 | conserved Plasmodium protein, unknown function                |
| PVVCY_1204070 | 4.491  | 4.793  | 5.936  | 6.151  | 14.082 | structural maintenance of chromosomes protein 6, putative     |
| PVVCY_1305720 | 3.636  | 3.856  | 6.793  | 6.743  | 14.112 | mitochondrial pyruvate carrier protein 1, putative            |
| PVVCY_1000200 | 4.852  | 4.593  | 5.243  | 4.895  | 14.122 | conserved Plasmodium protein, unknown function                |
| PVVCY_0900280 | 5.922  | 5.634  | 6.136  | 5.773  | 14.134 | FeS cluster assembly protein SufD, putative                   |
| PVVCY_1305060 | 3.801  | 3.996  | 5.380  | 5.462  | 14.148 | ubiquitin activating enzyme, putative                         |
| PVVCY_1002210 | 7.175  | 7.281  | 7.629  | 7.713  | 14.191 | conserved Plasmodium protein, unknown function                |
| PVVCY_0601170 | 7.242  | 7.414  | 9.533  | 9.535  | 14.210 | ribonucleoside-diphosphate reductase large subunit, putative  |
| PVVCY_0901960 | 11.265 | 11.441 | 11.962 | 12.108 | 14.236 | circumsporozoite-related antigen exported protein 1, putative |
| PVVCY_1000430 | 3.351  | 3.901  | 5.657  | 6.108  | 14.251 | origin recognition complex subunit 2, putative                |
| PVVCY_1300450 | 0.611  | 0.660  | 1.741  | 1.705  | 14.252 | conserved Plasmodium protein, unknown function                |
| PVVCY_1301230 | 3.843  | 4.090  | 4.853  | 5.059  | 14.270 | glutaminy-peptide cyclotransferase, putative                  |
| PVVCY_1406040 | 4.412  | 4.612  | 6.978  | 7.006  | 14.279 | kinesin-13, putative                                          |
| PVVCY_1102770 | 6.469  | 6.185  | 7.061  | 6.690  | 14.327 | acetyl-CoA synthetase, putative                               |
| PVVCY_0900440 | 10.999 | 11.143 | 12.693 | 12.736 | 14.347 | histone H2B, putative                                         |
| PVVCY_1201050 | 2.221  | 2.857  | 4.521  | 5.084  | 14.353 | protein ARV1, putative                                        |
| PVVCY_1200900 | 2.247  | 2.595  | 4.533  | 4.771  | 14.371 | kinesin-4, putative                                           |
| PVVCY_0401960 | 2.718  | 3.287  | 5.987  | 6.414  | 14.389 | fam-b protein                                                 |
| PVVCY_0701630 | 3.767  | 3.798  | 4.441  | 4.432  | 14.401 | RNA-binding protein, putative                                 |
| PVVCY_0502570 | 1.110  | 1.106  | 1.771  | 1.725  | 14.430 | PIR protein CIR protein                                       |
| PVVCY_0301190 | 8.204  | 7.714  | 8.371  | 7.811  | 14.439 | protein transport protein SEC31, putative                     |
| PVVCY_0500560 | 10.387 | 10.264 | 10.880 | 10.712 | 14.439 | ADP-ribosylation factor, putative                             |

|               |       |       |       |       |        |                                                           |
|---------------|-------|-------|-------|-------|--------|-----------------------------------------------------------|
| PVVCY_1001200 | 6.455 | 6.548 | 7.289 | 7.345 | 14.467 | conserved Plasmodium protein, unknown function            |
| PVVCY_1302170 | 3.782 | 4.062 | 6.114 | 6.296 | 14.488 | conserved Plasmodium protein, unknown function            |
| PVVCY_0902180 | 4.811 | 4.994 | 6.422 | 6.539 | 14.507 | structural maintenance of chromosomes protein 5, putative |
| PVVCY_1303370 | 5.295 | 5.573 | 7.235 | 7.442 | 14.532 | rab GTPase activator, putative                            |
| PVVCY_0601460 | 5.605 | 5.412 | 6.021 | 5.789 | 14.549 | cysteine desulfurase, putative                            |
| PVVCY_0902050 | 2.661 | 2.822 | 4.731 | 4.811 | 14.570 | conserved Plasmodium protein, unknown function            |
| PVVCY_0400650 | 4.064 | 4.624 | 7.066 | 7.540 | 14.575 | conserved protein, unknown function                       |
| PVVCY_1300080 | 7.367 | 7.525 | 8.323 | 8.453 | 14.576 | fam-b protein                                             |
| PVVCY_1305400 | 4.743 | 4.812 | 7.378 | 7.341 | 14.603 | conserved Plasmodium protein, unknown function            |
| PVVCY_0200610 | 5.628 | 6.203 | 8.532 | 9.034 | 14.612 | centrin-1, putative                                       |
| PVVCY_0300120 | 6.661 | 6.871 | 9.501 | 9.617 | 14.640 | fam-a protein                                             |
| PVVCY_0501580 | 3.726 | 4.235 | 6.437 | 6.897 | 14.723 | conserved Plasmodium protein, unknown function            |
| PVVCY_1400520 | 3.883 | 4.022 | 7.196 | 7.252 | 14.740 | conserved Plasmodium protein, unknown function            |
| PVVCY_1301190 | 5.407 | 5.128 | 6.294 | 5.976 | 14.744 | conserved Plasmodium protein, unknown function            |
| PVVCY_1101000 | 2.096 | 2.322 | 4.955 | 5.119 | 14.755 | ERCC4 domain-containing protein, putative                 |
| PVVCY_0701710 | 6.318 | 5.996 | 6.384 | 6.048 | 14.813 | cdc2-related protein kinase 3, putative                   |
| PVVCY_1003040 | 5.546 | 5.207 | 6.422 | 6.065 | 14.885 | conserved Plasmodium protein, unknown function            |
| PVVCY_1202910 | 4.461 | 4.668 | 7.395 | 7.574 | 14.896 | transcription factor with AP2 domain(s), putative         |
| PVVCY_1304390 | 1.690 | 1.877 | 4.062 | 4.229 | 14.902 | GTPase-activating protein, putative                       |
| PVVCY_0600040 | 3.453 | 3.649 | 6.648 | 6.818 | 14.913 | fam-a protein                                             |
| PVVCY_1405090 | 1.847 | 2.012 | 4.353 | 4.500 | 14.916 | conserved Plasmodium protein, unknown function            |
| PVVCY_0900490 | 4.548 | 4.890 | 6.318 | 6.656 | 14.958 | centrin-4, putative                                       |
| PVVCY_0900060 | 2.101 | 2.480 | 4.003 | 4.377 | 14.963 | CIR protein PIR protein                                   |
| PVVCY_1400400 | 1.213 | 1.428 | 3.383 | 3.603 | 15.032 | conserved Plasmodium protein, unknown function            |
| PVVCY_0301020 | 4.831 | 4.734 | 5.231 | 5.139 | 15.062 | conserved Plasmodium protein, unknown function            |
| PVVCY_0900810 | 0.959 | 1.130 | 2.307 | 2.485 | 15.068 | conserved Plasmodium protein, unknown function            |
| PVVCY_1306540 | 3.329 | 3.633 | 5.387 | 5.704 | 15.082 | conserved Plasmodium protein, unknown function            |

|               |       |       |       |       |        |                                                                     |
|---------------|-------|-------|-------|-------|--------|---------------------------------------------------------------------|
| PVVCY_1304300 | 3.600 | 3.495 | 6.498 | 6.426 | 15.097 | lactate dehydrogenase, putative                                     |
| PVVCY_1100720 | 2.683 | 2.840 | 4.757 | 4.935 | 15.109 | GTPase-activating protein, putative                                 |
| PVVCY_1100190 | 3.978 | 4.112 | 6.450 | 6.609 | 15.110 | fam-a protein                                                       |
| PVVCY_1004430 | 3.351 | 3.569 | 5.973 | 6.215 | 15.112 | condensin complex subunit 1, putative                               |
| PVVCY_1102590 | 0.924 | 0.902 | 1.980 | 1.971 | 15.122 | conserved Plasmodium protein, unknown function                      |
| PVVCY_1001490 | 3.026 | 3.136 | 5.408 | 5.549 | 15.140 | conserved Plasmodium protein, unknown function                      |
| PVVCY_1000950 | 3.502 | 3.840 | 5.862 | 6.229 | 15.164 | DNA replication complex GINS protein, putative                      |
| PVVCY_0802470 | 6.259 | 6.267 | 7.065 | 7.088 | 15.188 | monocarboxylate transporter, putative                               |
| PVVCY_0600110 | 3.409 | 3.758 | 5.980 | 6.367 | 15.197 | conserved Plasmodium protein, unknown function                      |
| PVVCY_0400780 | 6.827 | 6.439 | 6.714 | 6.339 | 15.199 | splicing factor 3B subunit 1, putative                              |
| PVVCY_0301030 | 5.289 | 5.104 | 5.823 | 5.658 | 15.213 | conserved Plasmodium protein, unknown function                      |
| PVVCY_0903860 | 4.743 | 5.176 | 7.269 | 7.754 | 15.307 | conserved Plasmodium protein, unknown function                      |
| PVVCY_1305450 | 3.697 | 3.995 | 6.179 | 6.543 | 15.339 | LMBR1 domain-containing protein, putative                           |
| PVVCY_0901520 | 5.140 | 5.210 | 7.181 | 7.325 | 15.379 | conserved Plasmodium protein, unknown function                      |
| PVVCY_0902120 | 3.091 | 3.160 | 5.121 | 5.264 | 15.380 | leucine-rich repeat protein                                         |
| PVVCY_1302220 | 7.992 | 7.952 | 9.170 | 9.195 | 15.495 | signal peptide peptidase, putative                                  |
| PVVCY_1001410 | 3.416 | 4.144 | 6.033 | 6.822 | 15.509 | conserved Plasmodium protein, unknown function                      |
| PVVCY_0802830 | 4.962 | 5.287 | 7.732 | 8.168 | 15.511 | conserved Plasmodium protein, unknown function                      |
| PVVCY_1300520 | 3.740 | 3.755 | 6.390 | 6.552 | 15.550 | CCAAT-binding transcription factor, putative                        |
| PVVCY_1000760 | 4.242 | 4.004 | 7.067 | 7.049 | 15.650 | kinesin-8, putative                                                 |
| PVVCY_1102980 | 6.925 | 7.038 | 7.716 | 7.868 | 15.660 | phosphatidylinositol phosphatidylcholine transfer protein, putative |
| PVVCY_1401940 | 4.488 | 4.955 | 7.031 | 7.618 | 15.729 | conserved Plasmodium protein, unknown function                      |
| PVVCY_1203360 | 3.497 | 3.498 | 6.201 | 6.409 | 15.752 | zinc finger protein, putative                                       |
| PVVCY_1304330 | 4.595 | 4.469 | 6.942 | 7.021 | 15.776 | mitochondrial fission 1 protein, putative                           |
| PVVCY_0901750 | 7.086 | 6.793 | 7.232 | 6.997 | 15.776 | splicing factor U2AF small subunit, putative                        |
| PVVCY_0501980 | 5.528 | 5.499 | 8.892 | 9.138 | 15.791 | conserved Plasmodium protein, unknown function                      |
| PVVCY_0802520 | 2.674 | 2.804 | 4.997 | 5.308 | 15.859 | conserved Plasmodium protein, unknown function                      |

|               |       |       |        |        |        |                                                    |
|---------------|-------|-------|--------|--------|--------|----------------------------------------------------|
| PVVCY_0602510 | 2.561 | 2.701 | 5.664  | 6.055  | 15.870 | CIR protein PIR protein                            |
| PVVCY_1304020 | 2.270 | 2.601 | 4.507  | 4.978  | 15.871 | conserved Plasmodium protein, unknown function     |
| PVVCY_1104370 | 5.634 | 5.551 | 7.282  | 7.368  | 15.923 | phosphatidylserine synthase, putative              |
| PVVCY_1405890 | 5.258 | 5.438 | 7.813  | 8.207  | 15.959 | vacuolar-sorting protein SNF7, putative            |
| PVVCY_0401450 | 3.963 | 3.220 | 5.381  | 4.926  | 15.974 | zinc finger protein, putative                      |
| PVVCY_1102110 | 3.876 | 3.788 | 6.258  | 6.432  | 16.004 | conserved Plasmodium protein, unknown function     |
| PVVCY_0201030 | 4.370 | 4.050 | 4.577  | 4.345  | 16.023 | conserved Plasmodium protein, unknown function     |
| PVVCY_0904650 | 4.429 | 4.733 | 7.633  | 8.208  | 16.027 | fam-b protein                                      |
| PVVCY_0401900 | 6.405 | 6.007 | 6.413  | 6.101  | 16.039 | conserved Plasmodium protein, unknown function     |
| PVVCY_1304190 | 2.828 | 3.061 | 5.676  | 6.165  | 16.055 | conserved Plasmodium protein, unknown function     |
| PVVCY_0802480 | 5.202 | 5.170 | 7.343  | 7.550  | 16.065 | monocarboxylate transporter, putative              |
| PVVCY_1002860 | 1.220 | 1.445 | 3.554  | 3.993  | 16.113 | conserved Plasmodium protein, unknown function     |
| PVVCY_0502080 | 4.958 | 5.007 | 7.066  | 7.350  | 16.148 | dynammin-like protein, putative                    |
| PVVCY_1002510 | 4.057 | 3.900 | 7.033  | 7.268  | 16.171 | serine_threonine protein phosphatase 7, putative   |
| PVVCY_1305380 | 5.529 | 5.110 | 5.579  | 5.268  | 16.195 | exoribonuclease, putative                          |
| PVVCY_0600210 | 8.251 | 8.207 | 10.882 | 11.172 | 16.205 | high mobility group protein B1, putative           |
| PVVCY_0801540 | 3.411 | 3.505 | 5.909  | 6.287  | 16.207 | merozoite organizing protein, putative             |
| PVVCY_1201740 | 6.000 | 5.845 | 6.339  | 6.264  | 16.211 | cyclic amine resistance locus protein, putative    |
| PVVCY_1201280 | 2.624 | 2.608 | 5.674  | 6.042  | 16.221 | conserved Plasmodium protein, unknown function     |
| PVVCY_1406680 | 5.821 | 5.904 | 6.253  | 6.369  | 16.223 | conserved Plasmodium protein, unknown function     |
| PVVCY_0200230 | 2.745 | 2.813 | 5.189  | 5.544  | 16.227 | replication factor c protein, putative             |
| PVVCY_1202660 | 7.308 | 7.190 | 8.516  | 8.579  | 16.228 | GTPase-activating protein, putative                |
| PVVCY_1101030 | 6.682 | 6.232 | 6.412  | 6.041  | 16.234 | phosphatidylinositol 4-kinase, putative            |
| PVVCY_1403040 | 2.766 | 2.834 | 5.573  | 5.978  | 16.239 | tetratricopeptide repeat protein, putative         |
| PVVCY_1300230 | 5.798 | 5.763 | 6.234  | 6.263  | 16.245 | bromodomain protein, putative                      |
| PVVCY_0100110 | 1.641 | 1.200 | 3.060  | 2.911  | 16.247 | conserved rodent malaria protein, unknown function |
| PVVCY_0902070 | 4.423 | 4.252 | 7.375  | 7.625  | 16.255 | conserved Plasmodium protein, unknown function     |

|               |        |        |        |        |        |                                                                        |
|---------------|--------|--------|--------|--------|--------|------------------------------------------------------------------------|
| PVVCY_0501440 | 4.539  | 4.671  | 7.045  | 7.465  | 16.266 | conserved Plasmodium protein, unknown function                         |
| PVVCY_1404540 | 9.116  | 8.960  | 12.190 | 12.490 | 16.324 | merozoite surface protein 9, putative                                  |
| PVVCY_1201880 | 6.988  | 7.215  | 7.851  | 8.134  | 16.341 | conserved Plasmodium protein, unknown function                         |
| PVVCY_0902220 | 4.492  | 4.582  | 6.386  | 6.713  | 16.357 | conserved Plasmodium protein, unknown function                         |
| PVVCY_1301760 | 5.893  | 5.995  | 6.968  | 7.192  | 16.358 | degradation in the ER (DER1) like protein, putative                    |
| PVVCY_0800130 | 4.609  | 4.285  | 4.958  | 4.772  | 16.358 | conserved Plasmodium protein, unknown function                         |
| PVVCY_1001140 | 2.537  | 2.770  | 5.333  | 5.892  | 16.374 | conserved Plasmodium protein, unknown function                         |
| PVVCY_0701510 | 3.377  | 3.165  | 6.474  | 6.757  | 16.380 | conserved Plasmodium protein, unknown function                         |
| PVVCY_1104130 | 6.292  | 5.935  | 6.099  | 5.818  | 16.414 | pre-mRNA-splicing factor ATP-dependent RNA helicase PRP16, putative    |
| PVVCY_1101790 | 12.217 | 12.064 | 12.617 | 12.565 | 16.416 | histone H3 variant, putative                                           |
| PVVCY_0901470 | 6.193  | 6.010  | 7.220  | 7.240  | 16.430 | folate transporter 2, putative                                         |
| PVVCY_0300540 | 7.557  | 7.564  | 8.869  | 9.069  | 16.457 | merozoite surface protein 4/5, putative                                |
| PVVCY_0301510 | 5.808  | 5.960  | 7.984  | 8.415  | 16.460 | calcium-dependent protein kinase 1, putative                           |
| PVVCY_0301330 | 7.411  | 7.002  | 7.086  | 6.751  | 16.470 | DNA-directed RNA polymerase II subunit RPB2, putative                  |
| PVVCY_0100700 | 0.460  | 0.554  | 1.477  | 1.695  | 16.477 | MYND finger protein, putative                                          |
| PVVCY_1200600 | 5.816  | 5.743  | 6.954  | 7.076  | 16.487 | conserved membrane protein, unknown function                           |
| PVVCY_0800270 | 4.695  | 2.726  | 5.976  | 7.156  | 16.508 | dipeptidyl aminopeptidase 3, putative                                  |
| PVVCY_1404150 | 6.062  | 5.961  | 8.873  | 9.237  | 16.513 | histone chaperone ASF1, putative                                       |
| PVVCY_0800390 | 4.421  | 2.666  | 5.942  | 7.245  | 16.524 | apical sushi protein, putative                                         |
| PVVCY_0200880 | 4.676  | 2.803  | 6.023  | 7.252  | 16.529 | conserved Plasmodium protein, unknown function                         |
| PVVCY_1102040 | 5.092  | 3.206  | 6.254  | 7.378  | 16.533 | merozoite surface protein 10, putative                                 |
| PVVCY_1000260 | 4.011  | 3.132  | 5.850  | 7.167  | 16.534 | conserved Plasmodium protein, unknown function                         |
| PVVCY_1402840 | 3.070  | 3.084  | 5.381  | 5.753  | 16.536 | cullin-1, putative                                                     |
| PVVCY_0101640 | 0.797  | 0.421  | 1.379  | 1.818  | 16.538 | PIR protein CIR protein                                                |
| PVVCY_0400930 | 3.586  | 3.733  | 6.228  | 6.743  | 16.539 | parasite-infected erythrocyte surface protein                          |
| PVVCY_0301260 | 4.535  | 2.739  | 6.054  | 7.386  | 16.540 | rhoptry neck protein 6, putative                                       |
| PVVCY_1004080 | 8.384  | 7.361  | 9.312  | 10.109 | 16.540 | glideosome associated protein with multiple membrane spans 3, putative |



|               |        |        |        |        |        |                                                    |
|---------------|--------|--------|--------|--------|--------|----------------------------------------------------|
| PVVCY_0200710 | 2.820  | 2.883  | 5.096  | 5.499  | 16.548 | conserved Plasmodium protein, unknown function     |
| PVVCY_1401840 | 2.039  | 1.953  | 4.055  | 4.316  | 16.551 | conserved Plasmodium protein, unknown function     |
| PVVCY_1204570 | 3.012  | 2.379  | 4.419  | 5.434  | 16.557 | conserved Plasmodium protein, unknown function     |
| PVVCY_1201410 | 4.371  | 3.075  | 5.663  | 6.762  | 16.558 | conserved Plasmodium protein, unknown function     |
| PVVCY_1400810 | 3.799  | 2.750  | 5.343  | 6.550  | 16.568 | tripartite motif protein, putative                 |
| PVVCY_0701000 | 4.358  | 3.916  | 5.223  | 5.866  | 16.572 | conserved Plasmodium protein, unknown function     |
| PVVCY_1000130 | 14.499 | 13.833 | 13.793 | 13.517 | 16.582 | early transcribed membrane protein                 |
| PVVCY_0100660 | 6.867  | 6.351  | 6.424  | 6.003  | 16.582 | conserved Plasmodium protein, unknown function     |
| PVVCY_1001680 | 2.846  | 1.385  | 4.229  | 5.458  | 16.587 | SF-assemblin, putative                             |
| PVVCY_1403680 | 3.937  | 3.271  | 4.742  | 5.413  | 16.591 | formin 2, putative                                 |
| PVVCY_1204390 | 5.230  | 3.279  | 6.379  | 7.592  | 16.593 | palmitoyltransferase DHHC7, putative               |
| PVVCY_0700430 | 3.483  | 3.148  | 4.250  | 4.816  | 16.594 | alpha_beta hydrolase, putative                     |
| PVVCY_1302500 | 3.252  | 2.036  | 4.541  | 5.663  | 16.600 | conserved Plasmodium protein, unknown function     |
| PVVCY_0901460 | 6.646  | 6.510  | 7.053  | 7.345  | 16.602 | guanine nucleotide-exchange factor SEC12, putative |
| PVVCY_1200200 | 4.041  | 2.147  | 5.104  | 6.262  | 16.605 | conserved Plasmodium protein, unknown function     |
| PVVCY_1306630 | 7.299  | 6.711  | 8.268  | 9.030  | 16.606 | conserved Plasmodium protein, unknown function     |
| PVVCY_0900220 | 14.798 | 14.233 | 14.057 | 13.738 | 16.607 | early transcribed membrane protein                 |
| PVVCY_0602430 | 7.396  | 7.413  | 9.772  | 10.174 | 16.607 | fam-a protein                                      |
| PVVCY_1304610 | 5.918  | 3.879  | 7.280  | 8.670  | 16.608 | conserved Plasmodium protein, unknown function     |
| PVVCY_1201140 | 5.589  | 4.002  | 7.045  | 8.385  | 16.615 | rhopty associated adhesin, putative                |
| PVVCY_0200450 | 6.456  | 6.556  | 7.336  | 7.548  | 16.616 | conserved Plasmodium protein, unknown function     |
| PVVCY_1402850 | 2.262  | 0.516  | 3.294  | 4.414  | 16.620 | conserved Plasmodium protein, unknown function     |
| PVVCY_0602440 | 4.382  | 4.242  | 7.150  | 7.518  | 16.630 | conserved rodent malaria protein, unknown function |
| PVVCY_1305940 | 4.881  | 4.740  | 7.388  | 7.714  | 16.635 | conserved Plasmodium protein, unknown function     |
| PVVCY_1400420 | 4.075  | 3.969  | 6.504  | 6.849  | 16.668 | condensin complex subunit 2, putative              |
| PVVCY_1301840 | 2.222  | 2.439  | 3.650  | 4.037  | 16.668 | dynactin subunit 4, putative                       |
| PVVCY_1201770 | 2.523  | 2.556  | 4.311  | 5.439  | 16.672 | conserved Plasmodium protein, unknown function     |

|               |       |       |       |       |        |                                                 |
|---------------|-------|-------|-------|-------|--------|-------------------------------------------------|
| PVVCY_1402630 | 4.070 | 2.681 | 5.397 | 6.624 | 16.676 | conserved Plasmodium protein, unknown function  |
| PVVCY_1401250 | 2.593 | 1.112 | 3.776 | 4.938 | 16.677 | conserved Plasmodium protein, unknown function  |
| PVVCY_0201330 | 6.469 | 6.051 | 6.230 | 6.193 | 16.679 | mRNA (N6-adenosine)-methyltransferase, putative |
| PVVCY_1406260 | 3.736 | 2.298 | 4.836 | 5.937 | 16.682 | serine threonine protein kinase, putative       |
| PVVCY_0101290 | 4.513 | 2.600 | 5.648 | 6.904 | 16.682 | rhopty protein ROP14, putative                  |
| PVVCY_1300060 | 7.560 | 6.855 | 8.266 | 8.914 | 16.683 | fam-c protein                                   |
| PVVCY_1004030 | 8.393 | 7.949 | 8.080 | 8.003 | 16.683 | pre-mRNA-splicing factor 38B, putative          |
| PVVCY_0902060 | 1.487 | 0.832 | 1.487 | 1.670 | 16.685 | conserved Plasmodium protein, unknown function  |
| PVVCY_1303600 | 6.010 | 5.574 | 6.201 | 6.446 | 16.685 | conserved Plasmodium protein, unknown function  |
| PVVCY_1203790 | 2.668 | 2.067 | 4.159 | 5.281 | 16.686 | conserved Plasmodium protein, unknown function  |
| PVVCY_1401260 | 2.146 | 1.228 | 3.468 | 4.571 | 16.686 | conserved Plasmodium protein, unknown function  |
| PVVCY_1100870 | 3.628 | 3.276 | 4.107 | 4.512 | 16.686 | longevity-assurance (LAG1) protein, putative    |
| PVVCY_0300150 | 6.031 | 5.100 | 7.100 | 8.049 | 16.690 | conserved Plasmodium protein, unknown function  |
| PVVCY_0903530 | 3.874 | 3.164 | 5.415 | 6.606 | 16.693 | conserved Plasmodium protein, unknown function  |
| PVVCY_0801330 | 5.946 | 5.659 | 6.513 | 6.959 | 16.696 | BSD-domain protein, putative                    |
| PVVCY_0301340 | 4.066 | 3.831 | 6.533 | 6.808 | 16.697 | origin recognition complex subunit 5, putative  |
| PVVCY_1201300 | 4.274 | 2.537 | 5.669 | 7.064 | 16.698 | conserved Plasmodium protein, unknown function  |
| PVVCY_0800240 | 4.648 | 4.108 | 5.108 | 5.559 | 16.699 | 6-cysteine protein                              |
| PVVCY_1302630 | 2.810 | 2.313 | 3.520 | 4.125 | 16.709 | conserved Plasmodium protein, unknown function  |
| PVVCY_1104110 | 5.681 | 5.607 | 5.866 | 6.008 | 16.712 | conserved Plasmodium protein, unknown function  |
| PVVCY_0802560 | 2.795 | 2.121 | 3.131 | 3.547 | 16.713 | zinc finger protein, putative                   |
| PVVCY_1306140 | 3.889 | 3.866 | 6.349 | 6.768 | 16.716 | conserved Plasmodium protein, unknown function  |
| PVVCY_0200770 | 5.078 | 3.421 | 6.494 | 7.906 | 16.718 | conserved Plasmodium protein, unknown function  |
| PVVCY_1404600 | 3.560 | 2.432 | 4.982 | 6.243 | 16.720 | conserved Plasmodium protein, unknown function  |
| PVVCY_0601700 | 4.711 | 3.789 | 4.775 | 5.092 | 16.721 | NIMA related kinase 4, putative                 |
| PVVCY_0702150 | 4.270 | 2.575 | 5.812 | 7.329 | 16.728 | apical merozoite protein, putative              |
| PVVCY_1200440 | 2.652 | 1.893 | 2.704 | 2.968 | 16.728 | regulator of nonsense transcripts 1, putative   |

|               |       |       |        |        |        |                                                                       |
|---------------|-------|-------|--------|--------|--------|-----------------------------------------------------------------------|
| PVVCY_1306030 | 8.670 | 8.265 | 8.412  | 8.366  | 16.729 | heat shock protein 110, putative                                      |
| PVVCY_1200870 | 3.149 | 1.488 | 4.052  | 5.147  | 16.731 | protein phosphatase, putative                                         |
| PVVCY_0501530 | 3.871 | 4.118 | 5.345  | 6.232  | 16.736 | calmodulin, putative                                                  |
| PVVCY_1400760 | 2.333 | 1.673 | 2.583  | 2.952  | 16.743 | conserved Plasmodium protein, unknown function                        |
| PVVCY_1304580 | 3.965 | 3.874 | 5.727  | 5.984  | 16.745 | conserved Plasmodium protein, unknown function                        |
| PVVCY_1301450 | 9.812 | 8.227 | 11.400 | 12.938 | 16.746 | conserved Plasmodium protein, unknown function                        |
| PVVCY_1100940 | 5.375 | 3.524 | 6.325  | 7.531  | 16.748 | conserved Plasmodium protein, unknown function                        |
| PVVCY_1003240 | 3.173 | 3.157 | 5.679  | 6.119  | 16.751 | conserved Plasmodium protein, unknown function                        |
| PVVCY_1403820 | 4.453 | 4.590 | 6.267  | 6.681  | 16.755 | histone-lysine N-methyltransferase, H3 lysine-4 specific, putative    |
| PVVCY_0902700 | 4.741 | 3.331 | 5.934  | 7.183  | 16.768 | conserved Plasmodium protein, unknown function                        |
| PVVCY_0500290 | 5.389 | 4.050 | 6.281  | 7.312  | 16.773 | serine_threonine protein phosphatase 8, putative                      |
| PVVCY_0600500 | 7.378 | 6.797 | 7.369  | 7.554  | 16.773 | conserved protein, unknown function                                   |
| PVVCY_0400470 | 4.377 | 4.597 | 7.218  | 7.876  | 16.773 | AP endonuclease (DNA-[apurinic or apyrimidinic site] lyase), putative |
| PVVCY_1304970 | 6.179 | 3.447 | 6.960  | 8.377  | 16.774 | conserved Plasmodium protein, unknown function                        |
| PVVCY_1401810 | 3.896 | 2.878 | 5.247  | 6.486  | 16.781 | conserved Plasmodium protein, unknown function                        |
| PVVCY_0700200 | 3.746 | 2.009 | 4.611  | 5.770  | 16.785 | folate transporter 1, putative                                        |
| PVVCY_1201750 | 5.893 | 5.317 | 5.547  | 5.510  | 16.792 | WD repeat-containing protein, putative                                |
| PVVCY_0501570 | 4.319 | 2.748 | 5.398  | 6.655  | 16.795 | MORN repeat-containing protein 1, putative                            |
| PVVCY_1403850 | 4.008 | 2.588 | 5.057  | 6.245  | 16.796 | conserved Plasmodium protein, unknown function                        |
| PVVCY_0801000 | 3.374 | 2.239 | 4.142  | 5.046  | 16.797 | NAD(P)H-dependent glutamate synthase, putative                        |
| PVVCY_1204520 | 3.552 | 3.665 | 5.313  | 5.710  | 16.798 | conserved Plasmodium protein, unknown function                        |
| PVVCY_1000380 | 3.805 | 2.101 | 4.992  | 6.372  | 16.799 | conserved Plasmodium protein, unknown function                        |
| PVVCY_1102070 | 2.690 | 2.896 | 4.771  | 5.287  | 16.807 | DnaJ protein, putative                                                |
| PVVCY_1200330 | 7.494 | 7.267 | 7.782  | 7.695  | 16.831 | RNA-binding protein, putative                                         |
| PVVCY_1103550 | 3.653 | 3.426 | 5.131  | 5.271  | 16.842 | patatin-like phospholipase, putative                                  |
| PVVCY_0601140 | 6.425 | 6.341 | 6.901  | 6.940  | 16.853 | conserved Plasmodium protein, unknown function                        |
| PVVCY_1202800 | 4.411 | 3.267 | 5.837  | 7.198  | 16.854 | SF-assemblin, putative                                                |

|               |       |       |       |        |        |                                                             |
|---------------|-------|-------|-------|--------|--------|-------------------------------------------------------------|
| PVVCY_0901690 | 4.506 | 2.456 | 5.698 | 7.222  | 16.856 | myosin light chain B, putative                              |
| PVVCY_1404950 | 2.672 | 2.161 | 5.453 | 5.670  | 16.857 | conserved Plasmodium protein, unknown function              |
| PVVCY_0802890 | 5.561 | 3.287 | 6.532 | 7.984  | 16.857 | diacylglycerol kinase, putative                             |
| PVVCY_0401370 | 2.254 | 0.906 | 3.542 | 4.884  | 16.857 | conserved Plasmodium protein, unknown function              |
| PVVCY_1001620 | 8.252 | 7.714 | 8.549 | 8.940  | 16.861 | DNA topoisomerase 2, putative                               |
| PVVCY_0501960 | 7.608 | 4.921 | 8.649 | 10.303 | 16.862 | CCAT-binding transcription factor-like protein, putative    |
| PVVCY_1301600 | 6.220 | 6.130 | 6.571 | 6.583  | 16.866 | conserved Plasmodium protein, unknown function              |
| PVVCY_0500180 | 5.703 | 4.126 | 7.138 | 8.690  | 16.880 | rhostry neck protein 12, putative                           |
| PVVCY_1306160 | 5.547 | 3.216 | 6.548 | 8.080  | 16.880 | inner membrane complex protein, putative                    |
| PVVCY_0903010 | 3.046 | 3.311 | 4.552 | 5.007  | 16.881 | conserved Plasmodium protein, unknown function              |
| PVVCY_0903210 | 6.967 | 4.024 | 7.739 | 9.340  | 16.882 | apical membrane antigen 1, putative                         |
| PVVCY_0301710 | 6.233 | 6.220 | 9.060 | 9.601  | 16.883 | fam-b protein                                               |
| PVVCY_1101800 | 4.408 | 2.097 | 5.434 | 6.981  | 16.884 | conserved Plasmodium protein, unknown function              |
| PVVCY_1200590 | 9.181 | 8.145 | 9.472 | 10.054 | 16.889 | PPPDE peptidase, putative                                   |
| PVVCY_1302050 | 6.270 | 3.855 | 6.925 | 8.269  | 16.892 | conserved Plasmodium protein, unknown function              |
| PVVCY_0101350 | 5.957 | 3.192 | 6.645 | 8.148  | 16.895 | myosin-like protein, putative                               |
| PVVCY_0902250 | 1.778 | 1.387 | 2.563 | 2.479  | 16.897 | pyruvate dehydrogenase E1 component subunit alpha, putative |
| PVVCY_1302150 | 3.145 | 1.342 | 4.308 | 5.786  | 16.901 | conserved Plasmodium protein, unknown function              |
| PVVCY_1303830 | 4.186 | 2.662 | 5.213 | 6.494  | 16.902 | protein disulfide-isomerase, putative                       |
| PVVCY_0100750 | 1.735 | 1.490 | 2.145 | 2.520  | 16.903 | spindle assembly abnormal protein 6, putative               |
| PVVCY_0501350 | 3.935 | 3.033 | 4.896 | 5.898  | 16.903 | inner membrane complex protein 1m, putative                 |
| PVVCY_0400760 | 5.100 | 2.387 | 5.741 | 7.207  | 16.903 | conserved Plasmodium protein, unknown function              |
| PVVCY_0600460 | 7.801 | 7.077 | 8.111 | 8.599  | 16.905 | zinc finger protein, putative                               |
| PVVCY_1402960 | 1.019 | 0.665 | 3.211 | 3.428  | 16.909 | RuvB-like helicase 1, putative                              |
| PVVCY_1403130 | 2.278 | 2.026 | 2.779 | 3.220  | 16.909 | integral membrane protein GPR180, putative                  |
| PVVCY_1303420 | 5.498 | 3.299 | 6.477 | 7.991  | 16.910 | zinc finger protein, putative                               |
| PVVCY_1306890 | 3.860 | 2.722 | 4.370 | 5.161  | 16.915 | PIR protein CIR protein                                     |

|               |       |       |        |        |        |                                                                     |
|---------------|-------|-------|--------|--------|--------|---------------------------------------------------------------------|
| PVVCY_1404660 | 3.579 | 1.826 | 4.452  | 5.735  | 16.920 | myosin D, putative                                                  |
| PVVCY_1103090 | 5.975 | 5.234 | 6.928  | 7.880  | 16.927 | tetratricopeptide repeat protein, putative                          |
| PVVCY_0802680 | 6.762 | 6.101 | 7.359  | 8.033  | 16.928 | conserved Plasmodium protein, unknown function                      |
| PVVCY_0300600 | 7.993 | 7.304 | 11.014 | 11.201 | 16.929 | serine repeat antigen 3, putative                                   |
| PVVCY_1000800 | 1.389 | 1.017 | 1.466  | 1.667  | 16.939 | P-type ATPase, putative                                             |
| PVVCY_1301440 | 4.409 | 3.078 | 5.513  | 6.814  | 16.940 | conserved Plasmodium protein, unknown function                      |
| PVVCY_1405060 | 5.811 | 5.467 | 6.218  | 6.639  | 16.940 | sentrin-specific protease 1, putative                               |
| PVVCY_1201330 | 6.284 | 3.471 | 6.855  | 8.381  | 16.944 | conserved Plasmodium protein, unknown function                      |
| PVVCY_0903550 | 5.092 | 2.714 | 5.756  | 7.178  | 16.946 | subtilisin-like protease 2, putative                                |
| PVVCY_0501460 | 6.861 | 6.532 | 6.660  | 6.423  | 16.947 | pre-mRNA-splicing factor ATP-dependent RNA helicase PRP22, putative |
| PVVCY_0700230 | 5.085 | 4.753 | 6.199  | 7.114  | 16.947 | conserved Plasmodium protein, unknown function                      |
| PVVCY_1301110 | 7.122 | 6.952 | 7.405  | 7.360  | 16.948 | RNA-binding protein, putative                                       |
| PVVCY_0800290 | 6.599 | 3.966 | 7.409  | 9.041  | 16.949 | 6-cysteine protein                                                  |
| PVVCY_0903570 | 3.322 | 1.961 | 4.432  | 5.763  | 16.951 | apical exonemal protein, putative                                   |
| PVVCY_0300480 | 4.454 | 2.937 | 5.287  | 6.487  | 16.952 | pantothenate transporter, putative                                  |
| PVVCY_1306740 | 5.878 | 3.328 | 6.562  | 8.080  | 16.954 | inner membrane complex protein 1f, putative                         |
| PVVCY_1204380 | 3.077 | 1.415 | 4.037  | 5.390  | 16.956 | conserved Plasmodium protein, unknown function                      |
| PVVCY_1200670 | 8.016 | 7.170 | 7.718  | 7.853  | 16.956 | transcription factor with AP2 domain(s), putative                   |
| PVVCY_0500830 | 2.218 | 2.321 | 3.294  | 4.010  | 16.959 | conserved Plasmodium protein, unknown function                      |
| PVVCY_1001400 | 5.833 | 2.931 | 6.398  | 7.986  | 16.959 | conserved Plasmodium protein, unknown function                      |
| PVVCY_1001820 | 4.098 | 3.056 | 5.069  | 6.184  | 16.963 | conserved Plasmodium protein, unknown function                      |
| PVVCY_0902470 | 6.433 | 3.886 | 7.186  | 8.786  | 16.974 | autophagy-related protein 23, putative                              |
| PVVCY_1200630 | 3.561 | 1.923 | 4.437  | 5.744  | 16.975 | RING zinc finger protein, putative                                  |
| PVVCY_1201240 | 6.702 | 6.448 | 7.366  | 7.943  | 16.975 | conserved Plasmodium protein, unknown function                      |
| PVVCY_1103750 | 7.261 | 6.840 | 7.458  | 7.776  | 16.980 | RNA-binding protein, putative                                       |
| PVVCY_1300500 | 6.453 | 6.073 | 6.588  | 6.391  | 16.984 | Sad1_UNC domain-containing protein, putative                        |
| PVVCY_1101360 | 5.779 | 4.992 | 6.477  | 7.313  | 16.992 | conserved Plasmodium protein, unknown function                      |

|               |       |       |       |        |        |                                                                      |
|---------------|-------|-------|-------|--------|--------|----------------------------------------------------------------------|
| PVVCY_0501010 | 2.980 | 1.333 | 3.949 | 5.349  | 16.992 | conserved Plasmodium protein, unknown function                       |
| PVVCY_1301290 | 3.568 | 1.976 | 2.411 | 2.269  | 16.993 | inner membrane complex protein, putative                             |
| PVVCY_0903190 | 3.760 | 3.141 | 6.760 | 7.017  | 16.998 | conserved Plasmodium protein, unknown function                       |
| PVVCY_1400820 | 4.598 | 2.567 | 5.437 | 6.917  | 16.999 | conserved Plasmodium protein, unknown function                       |
| PVVCY_1000520 | 5.453 | 3.865 | 6.457 | 7.866  | 16.999 | conserved Plasmodium protein, unknown function                       |
| PVVCY_0701440 | 5.247 | 4.603 | 5.946 | 6.726  | 17.000 | vacuolar protein sorting-associated protein 2, putative              |
| PVVCY_0201500 | 6.936 | 4.691 | 7.426 | 8.751  | 17.000 | fam-a protein                                                        |
| PVVCY_0601560 | 4.511 | 3.555 | 5.191 | 6.093  | 17.000 | conserved Plasmodium protein, unknown function                       |
| PVVCY_0900520 | 8.879 | 8.237 | 8.818 | 9.053  | 17.001 | conserved Plasmodium protein, unknown function                       |
| PVVCY_0201290 | 3.622 | 3.142 | 5.928 | 6.125  | 17.001 | conserved Plasmodium protein, unknown function                       |
| PVVCY_0800320 | 3.986 | 2.318 | 4.981 | 6.424  | 17.005 | ag-1 blood stage membrane protein homologue                          |
| PVVCY_1401090 | 8.117 | 5.480 | 8.671 | 10.224 | 17.006 | RNA-binding protein, putative                                        |
| PVVCY_1303900 | 1.631 | 0.948 | 1.836 | 2.284  | 17.008 | conserved Plasmodium protein, unknown function                       |
| PVVCY_0700760 | 7.849 | 5.025 | 8.388 | 10.019 | 17.010 | conserved Plasmodium protein, unknown function                       |
| PVVCY_1102800 | 2.842 | 1.701 | 3.797 | 4.992  | 17.016 | HECT-domain (ubiquitin-transferase), putative                        |
| PVVCY_0301040 | 5.519 | 2.650 | 5.991 | 7.611  | 17.020 | secreted protein with altered thrombospondin repeat domain, putative |
| PVVCY_1103690 | 9.528 | 8.990 | 9.639 | 9.351  | 17.028 | CUGBP Elav-like family member 1, putative                            |
| PVVCY_1303280 | 5.773 | 5.596 | 6.360 | 6.382  | 17.042 | rhopty protein, putative                                             |
| PVVCY_1003300 | 3.219 | 3.009 | 5.877 | 6.326  | 17.062 | uracil-DNA glycosylase, putative                                     |
| PVVCY_0701600 | 3.608 | 3.351 | 6.188 | 6.599  | 17.077 | calmodulin-like protein, putative                                    |
| PVVCY_1304310 | 2.362 | 1.955 | 5.054 | 5.404  | 17.078 | conserved Plasmodium protein, unknown function                       |
| PVVCY_1204310 | 4.235 | 3.859 | 6.391 | 6.643  | 17.078 | conserved Plasmodium protein, unknown function                       |
| PVVCY_1104320 | 5.478 | 4.998 | 5.338 | 5.455  | 17.084 | conserved Plasmodium protein, unknown function                       |
| PVVCY_1002070 | 3.845 | 3.736 | 5.998 | 6.402  | 17.085 | conserved Plasmodium protein, unknown function                       |
| PVVCY_1201380 | 7.421 | 7.106 | 7.875 | 7.795  | 17.087 | transcriptional coactivator ADA2, putative                           |
| PVVCY_0700730 | 9.382 | 8.870 | 9.433 | 9.706  | 17.087 | RNA-binding protein, putative                                        |
| PVVCY_1003350 | 5.123 | 3.999 | 5.936 | 7.046  | 17.087 | atypical protein kinase, ABC-1 family, putative                      |

|               |        |        |        |        |        |                                                       |
|---------------|--------|--------|--------|--------|--------|-------------------------------------------------------|
| PVVCY_0701300 | 5.029  | 3.285  | 5.918  | 7.370  | 17.089 | conserved Plasmodium protein, unknown function        |
| PVVCY_1203760 | 5.431  | 3.506  | 6.033  | 7.359  | 17.090 | conserved Plasmodium protein, unknown function        |
| PVVCY_0300850 | 4.889  | 2.617  | 5.618  | 7.200  | 17.092 | conserved Plasmodium protein, unknown function        |
| PVVCY_1201850 | 11.783 | 10.978 | 12.207 | 12.893 | 17.099 | histone H2A variant, putative                         |
| PVVCY_1002620 | 3.232  | 1.452  | 4.208  | 5.757  | 17.100 | conserved Plasmodium protein, unknown function        |
| PVVCY_0701370 | 3.600  | 2.347  | 4.203  | 5.233  | 17.102 | adenylate kinase 2, putative                          |
| PVVCY_0500860 | 8.668  | 8.017  | 8.563  | 8.791  | 17.103 | chromodomain-helicase-DNA-binding protein 1, putative |
| PVVCY_0902600 | 4.903  | 4.068  | 5.927  | 7.077  | 17.109 | conserved Plasmodium protein, unknown function        |
| PVVCY_1104470 | 0.653  | 0.555  | 1.965  | 2.198  | 17.110 | secreted ookinete protein, putative                   |
| PVVCY_1304010 | 2.395  | 2.405  | 4.556  | 5.036  | 17.111 | conserved Plasmodium protein, unknown function        |
| PVVCY_1204630 | 4.680  | 4.017  | 5.408  | 6.261  | 17.115 | formin 1, putative                                    |
| PVVCY_0500220 | 8.408  | 5.793  | 8.766  | 10.275 | 17.115 | conserved Plasmodium protein, unknown function        |
| PVVCY_0600400 | 7.770  | 5.480  | 8.460  | 10.062 | 17.116 | conserved Plasmodium protein, unknown function        |
| PVVCY_0700180 | 5.002  | 2.455  | 5.494  | 7.078  | 17.119 | GPI-anchored micronemal antigen, putative             |
| PVVCY_1200710 | 6.857  | 6.498  | 6.983  | 7.248  | 17.119 | zinc finger protein, putative                         |
| PVVCY_0502500 | 5.012  | 2.756  | 5.677  | 7.250  | 17.119 | conserved rodent malaria protein, unknown function    |
| PVVCY_1004490 | 6.797  | 6.526  | 6.866  | 7.048  | 17.123 | U1 small nuclear ribonucleoprotein C, putative        |
| PVVCY_1202980 | 5.648  | 2.874  | 6.136  | 7.841  | 17.127 | protein kinase, putative                              |
| PVVCY_0800910 | 3.760  | 2.104  | 4.760  | 6.303  | 17.127 | conserved Plasmodium protein, unknown function        |
| PVVCY_1003560 | 4.516  | 3.931  | 3.882  | 3.695  | 17.128 | conserved Plasmodium protein, unknown function        |
| PVVCY_0702070 | 3.527  | 2.268  | 4.527  | 5.882  | 17.130 | conserved Plasmodium protein, unknown function        |
| PVVCY_0801700 | 4.396  | 1.764  | 4.968  | 6.686  | 17.138 | conserved Plasmodium protein, unknown function        |
| PVVCY_0700660 | 6.927  | 6.419  | 6.525  | 6.474  | 17.140 | dicarboxylate_tricarboxylate carrier, putative        |
| PVVCY_0803010 | 1.189  | 0.978  | 1.553  | 1.929  | 17.141 | PIH1 domain-containing protein, putative              |
| PVVCY_1004280 | 4.013  | 1.434  | 4.424  | 6.005  | 17.143 | conserved Plasmodium protein, unknown function        |
| PVVCY_1402210 | 11.219 | 10.563 | 11.998 | 12.904 | 17.144 | histone H2B variant, putative                         |
| PVVCY_1204620 | 6.196  | 5.695  | 6.012  | 6.122  | 17.145 | CPW-WPC family protein                                |

|               |       |       |       |        |        |                                                  |
|---------------|-------|-------|-------|--------|--------|--------------------------------------------------|
| PVVCY_0701250 | 4.622 | 2.265 | 5.078 | 6.589  | 17.148 | zinc finger protein, putative                    |
| PVVCY_0901790 | 4.239 | 4.233 | 5.970 | 6.355  | 17.150 | conserved Plasmodium protein, unknown function   |
| PVVCY_1200580 | 8.442 | 7.342 | 8.654 | 9.362  | 17.152 | PPPDE peptidase, putative                        |
| PVVCY_1100800 | 5.926 | 3.607 | 6.461 | 8.038  | 17.163 | subtilisin-like protease 1, putative             |
| PVVCY_1303910 | 4.010 | 2.721 | 4.487 | 5.507  | 17.172 | conserved Plasmodium protein, unknown function   |
| PVVCY_0801280 | 7.668 | 6.653 | 8.386 | 9.447  | 17.172 | conserved Plasmodium protein, unknown function   |
| PVVCY_0801220 | 9.328 | 6.749 | 9.939 | 11.729 | 17.177 | conserved Plasmodium protein, unknown function   |
| PVVCY_1305990 | 1.952 | 1.565 | 3.218 | 4.377  | 17.178 | conserved Plasmodium protein, unknown function   |
| PVVCY_1304740 | 2.625 | 1.071 | 3.360 | 4.735  | 17.192 | apicoplast calcium binding protein 1, putative   |
| PVVCY_0700120 | 2.983 | 2.348 | 3.942 | 5.014  | 17.205 | prolyl 4-hydroxylase subunit alpha, putative     |
| PVVCY_0904630 | 7.001 | 6.225 | 7.294 | 7.934  | 17.208 | fam-a protein                                    |
| PVVCY_1101130 | 2.473 | 2.230 | 2.774 | 3.136  | 17.212 | WD repeat-containing protein, putative           |
| PVVCY_1304550 | 3.043 | 2.514 | 3.193 | 3.593  | 17.212 | regulator of nonsense transcripts 3B, putative   |
| PVVCY_1303730 | 5.056 | 3.773 | 4.297 | 4.403  | 17.214 | conserved Plasmodium protein, unknown function   |
| PVVCY_1201590 | 4.209 | 2.231 | 4.877 | 6.458  | 17.215 | Rh5 interacting protein, putative                |
| PVVCY_1302350 | 3.099 | 2.633 | 4.227 | 5.348  | 17.219 | conserved Plasmodium protein, unknown function   |
| PVVCY_0904120 | 2.902 | 1.823 | 4.095 | 5.599  | 17.219 | conserved Plasmodium protein, unknown function   |
| PVVCY_1101200 | 4.992 | 5.046 | 6.130 | 6.977  | 17.220 | apical rhoptry neck protein, putative            |
| PVVCY_1003060 | 2.731 | 1.065 | 3.307 | 4.655  | 17.220 | rap guanine nucleotide exchange factor, putative |
| PVVCY_1303520 | 6.224 | 3.534 | 6.454 | 8.091  | 17.221 | duffy-binding protein                            |
| PVVCY_0301240 | 5.160 | 3.346 | 5.873 | 7.408  | 17.221 | conserved Plasmodium protein, unknown function   |
| PVVCY_0401120 | 4.735 | 4.186 | 7.328 | 7.640  | 17.226 | glycogen synthase kinase 3, putative             |
| PVVCY_1402770 | 1.557 | 1.078 | 1.985 | 2.577  | 17.227 | conserved Plasmodium protein, unknown function   |
| PVVCY_1103590 | 7.036 | 7.202 | 8.900 | 9.423  | 17.229 | conserved Plasmodium protein, unknown function   |
| PVVCY_1003070 | 2.573 | 2.614 | 4.726 | 5.250  | 17.231 | cysteine protease ATG4, putative                 |
| PVVCY_0101320 | 4.268 | 1.975 | 4.855 | 6.574  | 17.234 | conserved Plasmodium protein, unknown function   |
| PVVCY_0200360 | 2.635 | 1.984 | 5.354 | 5.645  | 17.236 | phosphatidate cytidylyltransferase, putative     |



|               |       |       |       |        |        |                                                                      |
|---------------|-------|-------|-------|--------|--------|----------------------------------------------------------------------|
| PVVCY_1004330 | 4.463 | 2.634 | 3.653 | 4.040  | 17.242 | conserved Plasmodium protein, unknown function                       |
| PVVCY_1204130 | 8.048 | 5.517 | 8.588 | 10.416 | 17.242 | inner membrane complex protein 1g, putative                          |
| PVVCY_0100180 | 5.684 | 2.824 | 5.987 | 7.813  | 17.243 | reticulocyte binding protein, putative                               |
| PVVCY_0602330 | 5.495 | 2.873 | 6.021 | 7.892  | 17.245 | conserved Plasmodium protein, unknown function                       |
| PVVCY_1103430 | 4.447 | 2.905 | 4.912 | 6.136  | 17.246 | serine_threonine protein kinase, putative                            |
| PVVCY_0903450 | 2.735 | 2.395 | 4.751 | 5.045  | 17.247 | conserved Plasmodium protein, unknown function                       |
| PVVCY_1101050 | 2.878 | 2.216 | 2.977 | 3.425  | 17.248 | conserved Plasmodium protein, unknown function                       |
| PVVCY_1305880 | 8.053 | 5.796 | 8.333 | 9.821  | 17.251 | myosin A, putative                                                   |
| PVVCY_1405560 | 6.652 | 4.462 | 7.137 | 8.778  | 17.271 | protein kinase 2, putative                                           |
| PVVCY_0200440 | 8.107 | 5.509 | 8.563 | 10.425 | 17.276 | photosensitized INA-labeled protein PHIL1, putative                  |
| PVVCY_0501230 | 5.345 | 5.435 | 7.885 | 8.541  | 17.287 | centrin-3, putative                                                  |
| PVVCY_0900350 | 7.240 | 7.199 | 7.700 | 7.791  | 17.301 | chromatin remodeling protein, putative                               |
| PVVCY_0200500 | 8.834 | 8.437 | 8.828 | 8.623  | 17.318 | conserved Plasmodium protein, unknown function                       |
| PVVCY_0801260 | 8.559 | 8.144 | 8.427 | 8.565  | 17.325 | phospholipid or glycerol acyltransferase, putative                   |
| PVVCY_0100900 | 5.359 | 4.876 | 5.555 | 5.357  | 17.327 | conserved Plasmodium protein, unknown function                       |
| PVVCY_1203120 | 3.436 | 2.978 | 5.588 | 5.882  | 17.330 | cdc2-related protein kinase 5, putative                              |
| PVVCY_1204530 | 8.553 | 8.297 | 8.232 | 8.128  | 17.333 | zinc finger protein, putative                                        |
| PVVCY_0301350 | 2.555 | 2.445 | 5.289 | 5.907  | 17.338 | palmitoyltransferase DHHC11, putative                                |
| PVVCY_1304530 | 2.764 | 1.999 | 3.813 | 5.101  | 17.343 | conserved Plasmodium protein, unknown function                       |
| PVVCY_0301230 | 3.918 | 1.847 | 4.536 | 6.261  | 17.347 | serine_threonine protein kinase, putative                            |
| PVVCY_0901900 | 6.270 | 5.179 | 6.761 | 7.808  | 17.354 | palmitoyltransferase DHHC3, putative                                 |
| PVVCY_1000710 | 9.574 | 9.006 | 8.810 | 8.335  | 17.358 | DNA-directed RNA polymerases I, II, and III subunit RPABC5, putative |
| PVVCY_1403340 | 1.768 | 0.904 | 1.423 | 1.666  | 17.358 | conserved Plasmodium protein, unknown function                       |
| PVVCY_1403580 | 3.781 | 2.163 | 4.555 | 6.155  | 17.362 | thrombospondin-related apical membrane protein, putative             |
| PVVCY_1405110 | 7.246 | 5.671 | 7.001 | 7.759  | 17.364 | aspartyl protease, putative                                          |
| PVVCY_1402120 | 7.084 | 6.939 | 7.237 | 7.448  | 17.369 | palmitoyltransferase DHHC8, putative                                 |
| PVVCY_1004580 | 4.280 | 1.874 | 4.398 | 5.960  | 17.369 | lysophospholipase, putative                                          |

|               |       |       |       |       |        |                                                                                                          |
|---------------|-------|-------|-------|-------|--------|----------------------------------------------------------------------------------------------------------|
| PVVCY_0400670 | 4.627 | 4.012 | 7.287 | 7.644 | 17.370 | conserved Plasmodium protein, unknown function                                                           |
| PVVCY_1305640 | 2.563 | 2.037 | 2.461 | 2.702 | 17.374 | secreted ookinete protein, putative                                                                      |
| PVVCY_0602120 | 7.226 | 6.811 | 6.968 | 7.014 | 17.376 | conserved Plasmodium protein, unknown function                                                           |
| PVVCY_0200810 | 4.800 | 4.787 | 5.708 | 6.449 | 17.379 | novel putative transporter 1, putative                                                                   |
| PVVCY_0500460 | 5.860 | 5.459 | 6.601 | 7.448 | 17.382 | autophagy-related protein 8, putative                                                                    |
| PVVCY_1203390 | 6.113 | 6.009 | 8.724 | 9.331 | 17.384 | SWIB_MDM2 domain-containing protein, putative                                                            |
| PVVCY_1003360 | 5.131 | 4.149 | 5.930 | 7.185 | 17.384 | atypical protein kinase, ABC-1 family, putative                                                          |
| PVVCY_0600050 | 6.130 | 3.903 | 6.518 | 8.219 | 17.388 | reticulocyte binding protein, putative                                                                   |
| PVVCY_0301570 | 3.434 | 2.870 | 2.875 | 2.772 | 17.389 | conserved Plasmodium membrane protein, unknown function                                                  |
| PVVCY_1203040 | 3.131 | 1.812 | 4.155 | 5.808 | 17.389 | conserved Plasmodium protein, unknown function                                                           |
| PVVCY_0800370 | 2.484 | 1.335 | 2.356 | 2.970 | 17.391 | lysine decarboxylase, putative                                                                           |
| PVVCY_0904350 | 5.609 | 4.538 | 6.446 | 7.796 | 17.392 | serine threonine protein kinase, putative                                                                |
| PVVCY_0200460 | 7.073 | 6.845 | 7.835 | 7.915 | 17.392 | secreted ookinete protein, putative                                                                      |
| PVVCY_0101130 | 5.122 | 4.306 | 6.048 | 7.314 | 17.396 | conserved Plasmodium protein, unknown function                                                           |
| PVVCY_1200820 | 1.792 | 0.952 | 1.208 | 1.263 | 17.404 | conserved Plasmodium protein, unknown function                                                           |
| PVVCY_0300580 | 4.927 | 4.311 | 7.885 | 8.335 | 17.404 | serine repeat antigen 4, putative                                                                        |
| PVVCY_0800460 | 2.066 | 1.755 | 4.304 | 4.722 | 17.409 | conserved Plasmodium protein, unknown function                                                           |
| PVVCY_0801010 | 5.082 | 4.305 | 4.657 | 4.804 | 17.413 | conserved Plasmodium protein, unknown function                                                           |
| PVVCY_1301180 | 1.080 | 1.099 | 1.671 | 1.832 | 17.414 | pyruvate dehydrogenase E1 component subunit beta, putative                                               |
| PVVCY_0700170 | 3.863 | 3.507 | 6.722 | 7.281 | 17.419 | conserved Plasmodium protein, unknown function                                                           |
| PVVCY_0600430 | 5.051 | 4.572 | 5.823 | 6.767 | 17.420 | HAD domain ookinete protein, putative                                                                    |
| PVVCY_0700080 | 5.803 | 3.512 | 6.063 | 7.756 | 17.422 | reticulocyte binding protein, putative                                                                   |
| PVVCY_0501330 | 6.518 | 5.125 | 7.076 | 8.439 | 17.425 | merozoite TRAP-like protein, putative                                                                    |
| PVVCY_1000250 | 8.196 | 7.751 | 7.498 | 7.211 | 17.426 | erythrocyte membrane-associated antigen, putative                                                        |
| PVVCY_1401570 | 7.953 | 7.655 | 8.008 | 8.247 | 17.427 | CDP-diacylglycerol--inositol 3-phosphatidyltransferase, putative phosphatidylinositol synthase, putative |
| PVVCY_0904720 | 4.776 | 0.000 | 2.872 | 4.404 | 17.428 | hypothetical protein                                                                                     |

|               |       |       |        |        |        |                                                  |
|---------------|-------|-------|--------|--------|--------|--------------------------------------------------|
| PVVCY_1003290 | 2.039 | 0.762 | 2.422  | 3.570  | 17.430 | conserved Plasmodium protein, unknown function   |
| PVVCY_0501110 | 1.296 | 0.723 | 1.359  | 1.786  | 17.433 | cell division cycle protein 20 homolog, putative |
| PVVCY_1302080 | 2.773 | 2.238 | 5.283  | 5.671  | 17.436 | ferlin, putative                                 |
| PVVCY_0500150 | 9.916 | 8.105 | 10.122 | 11.481 | 17.437 | early transcribed membrane protein               |
| PVVCY_0501590 | 6.374 | 5.913 | 6.685  | 6.543  | 17.443 | conserved Plasmodium protein, unknown function   |
| PVVCY_0501130 | 5.822 | 3.042 | 5.981  | 7.952  | 17.445 | conserved Plasmodium protein, unknown function   |
| PVVCY_1303940 | 2.761 | 2.750 | 4.482  | 4.924  | 17.447 | conserved Plasmodium protein, unknown function   |
| PVVCY_0201370 | 1.797 | 0.931 | 1.683  | 2.163  | 17.447 | dynein heavy chain, putative                     |
| PVVCY_0401540 | 3.376 | 3.338 | 5.738  | 6.333  | 17.448 | kinetochore protein NUF2, putative               |
| PVVCY_0300610 | 5.809 | 4.966 | 8.792  | 9.164  | 17.452 | serine repeat antigen 2, putative                |
| PVVCY_0901660 | 5.293 | 5.209 | 6.146  | 6.916  | 17.460 | haloacid dehalogenase-like hydrolase, putative   |
| PVVCY_1302750 | 6.005 | 5.958 | 6.775  | 6.955  | 17.462 | conserved Plasmodium protein, unknown function   |
| PVVCY_0400730 | 6.305 | 4.451 | 6.898  | 8.645  | 17.463 | conserved Plasmodium protein, unknown function   |
| PVVCY_1306400 | 3.162 | 2.968 | 5.790  | 6.386  | 17.466 | GTPase, putative                                 |
| PVVCY_1303710 | 6.849 | 5.634 | 7.063  | 8.068  | 17.471 | diacylglycerol kinase, putative                  |
| PVVCY_0101530 | 3.253 | 1.371 | 2.912  | 3.906  | 17.472 | CIR protein PIR protein                          |
| PVVCY_1003180 | 1.941 | 1.575 | 3.667  | 3.947  | 17.473 | metacaspase-like protein                         |
| PVVCY_1001730 | 2.746 | 2.337 | 2.641  | 2.832  | 17.475 | leucine-rich repeat protein                      |
| PVVCY_0500200 | 4.460 | 2.349 | 4.750  | 6.445  | 17.482 | golgi re-assembly stacking protein, putative     |
| PVVCY_1200240 | 4.298 | 2.931 | 4.570  | 5.742  | 17.485 | conserved Plasmodium protein, unknown function   |
| PVVCY_1300410 | 5.708 | 4.960 | 5.917  | 6.615  | 17.496 | metacaspase-like protein                         |
| PVVCY_1102550 | 6.606 | 6.467 | 7.460  | 8.288  | 17.514 | conserved Plasmodium protein, unknown function   |
| PVVCY_1000960 | 6.677 | 5.714 | 6.683  | 7.373  | 17.514 | conserved Plasmodium protein, unknown function   |
| PVVCY_0800970 | 4.796 | 3.384 | 5.365  | 6.863  | 17.521 | conserved Plasmodium protein, unknown function   |
| PVVCY_1304410 | 7.958 | 7.408 | 7.468  | 7.441  | 17.526 | RNA-binding protein, putative                    |
| PVVCY_1200320 | 8.017 | 7.238 | 7.276  | 7.199  | 17.529 | E3 ubiquitin-protein ligase, putative            |
| PVVCY_1202340 | 5.278 | 3.277 | 5.506  | 7.145  | 17.530 | pepsinogen, putative                             |

|               |       |       |       |       |        |                                                             |
|---------------|-------|-------|-------|-------|--------|-------------------------------------------------------------|
| PVVCY_1300830 | 2.151 | 1.526 | 4.722 | 5.129 | 17.532 | conserved Plasmodium protein, unknown function              |
| PVVCY_1100420 | 4.509 | 2.340 | 4.657 | 6.358 | 17.535 | myosin B, putative                                          |
| PVVCY_1402880 | 9.217 | 8.475 | 8.421 | 8.272 | 17.537 | ATP-dependent RNA helicase DBP1, putative                   |
| PVVCY_1402230 | 7.282 | 6.625 | 7.810 | 7.653 | 17.544 | conserved Plasmodium protein, unknown function              |
| PVVCY_1002420 | 1.995 | 1.807 | 3.914 | 4.349 | 17.545 | enoyl-CoA hydratase, putative                               |
| PVVCY_0902460 | 6.325 | 3.628 | 6.094 | 7.868 | 17.545 | steryl ester hydrolase, putative                            |
| PVVCY_0600530 | 4.165 | 3.003 | 5.158 | 6.875 | 17.550 | conserved Plasmodium protein, unknown function              |
| PVVCY_1405680 | 5.007 | 4.648 | 5.693 | 5.717 | 17.551 | conserved Plasmodium protein, unknown function              |
| PVVCY_0601520 | 3.867 | 3.582 | 5.991 | 6.441 | 17.552 | conserved Plasmodium protein, unknown function              |
| PVVCY_0903950 | 5.415 | 4.231 | 4.628 | 4.818 | 17.553 | conserved Plasmodium protein, unknown function              |
| PVVCY_1302230 | 6.284 | 5.516 | 6.135 | 6.574 | 17.554 | conserved Plasmodium protein, unknown function              |
| PVVCY_1102720 | 7.775 | 7.517 | 7.759 | 7.937 | 17.562 | E3 ubiquitin-protein ligase RNF5, putative                  |
| PVVCY_1401660 | 6.472 | 6.017 | 6.248 | 6.393 | 17.567 | pre-mRNA-processing factor 40, putative                     |
| PVVCY_0502510 | 8.245 | 7.880 | 8.309 | 8.637 | 17.568 | PIR protein CIR protein                                     |
| PVVCY_1304680 | 2.774 | 2.356 | 5.221 | 5.705 | 17.569 | myosin C, putative                                          |
| PVVCY_1403760 | 2.203 | 1.999 | 4.413 | 4.929 | 17.571 | conserved Plasmodium protein, unknown function              |
| PVVCY_0902870 | 7.823 | 6.910 | 7.820 | 8.508 | 17.579 | major facilitator superfamily-related transporter, putative |
| PVVCY_1306200 | 2.577 | 1.646 | 2.466 | 3.075 | 17.583 | dynactin subunit 2, putative                                |
| PVVCY_1402480 | 4.704 | 2.186 | 4.785 | 6.774 | 17.585 | conserved Plasmodium protein, unknown function              |
| PVVCY_1304510 | 5.270 | 3.374 | 5.274 | 6.724 | 17.587 | conserved Plasmodium protein, unknown function              |
| PVVCY_0602290 | 3.600 | 3.027 | 5.617 | 5.928 | 17.604 | exonuclease I, putative                                     |
| PVVCY_0700960 | 4.766 | 4.823 | 6.969 | 7.613 | 17.615 | conserved Plasmodium protein, unknown function              |
| PVVCY_1301710 | 7.513 | 7.111 | 7.949 | 7.897 | 17.626 | sortilin, putative                                          |
| PVVCY_1403960 | 2.351 | 1.394 | 3.007 | 2.780 | 17.641 | transcription factor with AP2 domain(s), putative           |
| PVVCY_1104120 | 6.637 | 6.133 | 6.779 | 6.601 | 17.642 | conserved Plasmodium protein, unknown function              |
| PVVCY_1304910 | 4.319 | 4.420 | 6.098 | 6.648 | 17.644 | conserved Plasmodium protein, unknown function              |
| PVVCY_1003440 | 4.812 | 2.557 | 4.827 | 6.594 | 17.652 | conserved Plasmodium protein, unknown function              |

|               |       |       |       |       |        |                                                   |
|---------------|-------|-------|-------|-------|--------|---------------------------------------------------|
| PVVCY_1001690 | 6.502 | 5.966 | 6.132 | 6.221 | 17.653 | HP12 protein homolog, putative                    |
| PVVCY_0401870 | 4.702 | 3.673 | 4.025 | 4.225 | 17.655 | LCCL domain-containing protein                    |
| PVVCY_0700790 | 8.856 | 8.414 | 8.531 | 8.587 | 17.658 | protein transport protein SEC23, putative         |
| PVVCY_1002230 | 5.423 | 5.809 | 6.573 | 7.068 | 17.663 | selenoprotein, putative                           |
| PVVCY_0602190 | 6.395 | 6.213 | 6.838 | 6.887 | 17.669 | conserved Plasmodium protein, unknown function    |
| PVVCY_1103730 | 6.535 | 6.112 | 6.688 | 6.553 | 17.671 | conserved Plasmodium protein, unknown function    |
| PVVCY_0904450 | 5.878 | 5.367 | 6.210 | 6.914 | 17.672 | conserved Plasmodium protein, unknown function    |
| PVVCY_1001360 | 1.811 | 1.227 | 1.787 | 2.231 | 17.675 | actin-like protein, putative                      |
| PVVCY_1304040 | 2.857 | 2.844 | 4.354 | 4.780 | 17.676 | palmitoyltransferase DHHC5, putative              |
| PVVCY_0601230 | 4.668 | 4.485 | 6.882 | 7.444 | 17.679 | conserved Plasmodium protein, unknown function    |
| PVVCY_0600800 | 5.639 | 5.438 | 7.484 | 7.933 | 17.679 | zinc finger transcription factor, putative        |
| PVVCY_1002720 | 3.849 | 3.362 | 5.988 | 6.402 | 17.681 | mannose-1-phosphate guanylyltransferase, putative |
| PVVCY_1300130 | 7.062 | 3.906 | 6.519 | 8.561 | 17.683 | fam-a protein                                     |
| PVVCY_1404820 | 4.035 | 2.507 | 4.284 | 5.735 | 17.685 | amino acid transporter, putative                  |
| PVVCY_1003080 | 6.440 | 5.967 | 6.366 | 6.145 | 17.686 | NOT family protein, putative                      |
| PVVCY_0600220 | 4.233 | 4.273 | 6.003 | 6.535 | 17.694 | origin recognition complex subunit 1, putative    |
| PVVCY_1101080 | 4.769 | 4.105 | 4.555 | 4.902 | 17.700 | stripes inner membrane complex protein, putative  |
| PVVCY_1103410 | 6.515 | 6.397 | 6.865 | 6.918 | 17.705 | regulator of chromosome condensation, putative    |
| PVVCY_1306670 | 1.432 | 0.857 | 1.248 | 1.553 | 17.710 | transcription factor with AP2 domain(s), putative |
| PVVCY_0100400 | 2.773 | 2.429 | 5.112 | 5.659 | 17.719 | centrosomal protein CEP76, putative               |
| PVVCY_0900750 | 3.329 | 1.772 | 3.576 | 5.098 | 17.722 | conserved Plasmodium protein, unknown function    |
| PVVCY_0400970 | 4.166 | 4.181 | 6.195 | 6.799 | 17.723 | conserved Plasmodium protein, unknown function    |
| PVVCY_0500670 | 5.824 | 4.063 | 5.481 | 6.637 | 17.726 | RNA-binding protein, putative                     |
| PVVCY_1301470 | 2.572 | 2.337 | 4.616 | 5.124 | 17.729 | crossover junction endonuclease MUS81, putative   |
| PVVCY_1100830 | 8.473 | 7.845 | 7.968 | 8.029 | 17.730 | conserved Plasmodium protein, unknown function    |
| PVVCY_1304000 | 2.830 | 2.247 | 4.895 | 5.270 | 17.737 | conserved Plasmodium protein, unknown function    |
| PVVCY_1401870 | 5.395 | 3.590 | 5.473 | 7.075 | 17.743 | conserved Plasmodium protein, unknown function    |

|               |        |        |        |        |        |                                                                                        |
|---------------|--------|--------|--------|--------|--------|----------------------------------------------------------------------------------------|
| PVVCY_1100790 | 3.407  | 1.515  | 3.523  | 5.243  | 17.748 | conserved Plasmodium protein, unknown function                                         |
| PVVCY_0700920 | 12.070 | 11.360 | 12.528 | 13.557 | 17.749 | conserved Plasmodium protein, unknown function                                         |
| PVVCY_1403970 | 8.914  | 7.804  | 9.302  | 10.613 | 17.753 | glideosome-associated protein 45, putative                                             |
| PVVCY_1401980 | 8.372  | 7.929  | 8.028  | 8.089  | 17.754 | rhoptry protein 2, putative golgi protein 1, putative                                  |
| PVVCY_1103000 | 3.754  | 2.965  | 4.033  | 4.971  | 17.758 | conserved Plasmodium protein, unknown function                                         |
| PVVCY_0901570 | 7.410  | 7.268  | 7.599  | 7.896  | 17.762 | conserved Plasmodium protein, unknown function                                         |
| PVVCY_1200260 | 8.178  | 6.668  | 8.552  | 10.204 | 17.763 | inner membrane complex protein 1c, putative                                            |
| PVVCY_0301430 | 4.678  | 2.453  | 4.880  | 6.998  | 17.767 | autophagy-related protein 11, putative                                                 |
| PVVCY_1101550 | 7.418  | 6.776  | 7.066  | 7.295  | 17.768 | pre-mRNA-splicing factor CWC2, putative                                                |
| PVVCY_1000770 | 7.104  | 6.464  | 6.677  | 6.835  | 17.771 | ubiquitin-conjugating enzyme, putative                                                 |
| PVVCY_1303040 | 5.775  | 4.567  | 5.959  | 7.184  | 17.773 | serine_threonine protein phosphatase UIS2, putative                                    |
| PVVCY_0500380 | 5.314  | 4.774  | 5.831  | 6.788  | 17.778 | conserved Plasmodium protein, unknown function                                         |
| PVVCY_1202630 | 8.291  | 5.607  | 8.166  | 10.403 | 17.780 | IMC-associated apicomplexan protein, putative gamete release protein, putative         |
| PVVCY_0904540 | 4.615  | 3.570  | 3.865  | 4.079  | 17.781 | tubulin--tyrosine ligase, putative                                                     |
| PVVCY_0400330 | 7.168  | 5.876  | 7.170  | 8.314  | 17.788 | inner membrane complex protein 1e, putative                                            |
| PVVCY_0500770 | 5.503  | 4.453  | 5.848  | 7.105  | 17.790 | conserved Plasmodium protein, unknown function                                         |
| PVVCY_1406160 | 8.717  | 7.251  | 8.888  | 10.350 | 17.791 | myosin light chain 1, putative myosin A tail domain interacting protein MTIP, putative |
| PVVCY_1204480 | 5.173  | 4.634  | 7.587  | 8.111  | 17.794 | conserved Plasmodium protein, unknown function                                         |
| PVVCY_0700020 | 6.805  | 4.080  | 6.590  | 8.814  | 17.796 | erythrocyte membrane antigen 1                                                         |
| PVVCY_1001320 | 6.102  | 4.930  | 5.861  | 6.676  | 17.796 | conserved Plasmodium protein, unknown function                                         |
| PVVCY_1101100 | 4.220  | 3.862  | 6.179  | 6.637  | 17.799 | topoisomerase I, putative                                                              |
| PVVCY_1101410 | 4.247  | 3.490  | 6.695  | 7.147  | 17.799 | deoxyribodipyrimidine photo-lyase, putative                                            |
| PVVCY_0902650 | 2.516  | 1.570  | 2.446  | 3.227  | 17.803 | ATP-dependent 6-phosphofructokinase, putative                                          |
| PVVCY_0602410 | 10.199 | 9.539  | 10.239 | 10.869 | 17.805 | tryptophan-rich protein tryptophan-rich antigen                                        |
| PVVCY_1104350 | 6.490  | 6.107  | 6.800  | 6.747  | 17.807 | signal recognition particle receptor subunit alpha, putative                           |
| PVVCY_1100380 | 2.698  | 2.383  | 4.950  | 5.518  | 17.810 | conserved Plasmodium protein, unknown function                                         |
| PVVCY_1000970 | 4.630  | 3.846  | 7.363  | 7.900  | 17.813 | cdc2-related protein kinase 4, putative                                                |

|                    |       |       |       |       |        |                                                       |
|--------------------|-------|-------|-------|-------|--------|-------------------------------------------------------|
| PVVCY_0201520.gene | 2.234 | 1.179 | 2.846 | 4.384 | 17.814 | #N/A                                                  |
| PVVCY_1202820      | 5.926 | 5.724 | 6.001 | 6.256 | 17.815 | peptidyl-prolyl cis-trans isomerase, putative         |
| PVVCY_1306490      | 2.549 | 1.364 | 1.730 | 2.023 | 17.815 | conserved Plasmodium protein, unknown function        |
| PVVCY_0901700      | 3.075 | 2.228 | 3.036 | 3.767 | 17.816 | actin-related protein 2/3 complex subunit 1, putative |
| PVVCY_0903640      | 1.703 | 0.550 | 1.213 | 1.797 | 17.822 | conserved Plasmodium protein, unknown function        |
| PVVCY_0201550      | 6.248 | 4.408 | 6.007 | 7.454 | 17.822 | phosphatidylinositol 4-kinase, putative               |
| PVVCY_1306390      | 1.229 | 0.700 | 1.708 | 2.657 | 17.837 | conserved Plasmodium protein, unknown function        |
| PVVCY_1404000      | 3.712 | 2.933 | 6.223 | 6.707 | 17.838 | conserved Plasmodium protein, unknown function        |
| PVVCY_0200250      | 2.622 | 1.542 | 2.081 | 2.560 | 17.838 | kinesin-8, putative                                   |
| PVVCY_1300620      | 3.159 | 2.017 | 2.683 | 3.288 | 17.846 | conserved Plasmodium protein, unknown function        |
| PVVCY_1404800      | 5.227 | 3.923 | 5.636 | 7.256 | 17.854 | conserved Plasmodium protein, unknown function        |
| PVVCY_0502550      | 6.646 | 4.305 | 6.164 | 7.896 | 17.855 | fam-a protein                                         |
| PVVCY_1201830      | 2.366 | 1.902 | 4.487 | 4.977 | 17.855 | conserved Plasmodium protein, unknown function        |
| PVVCY_0300290      | 7.668 | 7.748 | 8.304 | 8.533 | 17.857 | conserved Plasmodium protein, unknown function        |
| PVVCY_1406270      | 2.296 | 1.337 | 2.545 | 3.691 | 17.859 | conserved Plasmodium protein, unknown function        |
| PVVCY_1300650      | 2.852 | 2.416 | 5.228 | 5.810 | 17.862 | conserved Plasmodium protein, unknown function        |
| PVVCY_1302940      | 6.567 | 5.032 | 6.585 | 8.060 | 17.866 | fam-a protein                                         |
| PVVCY_1403050      | 7.080 | 6.725 | 7.039 | 7.336 | 17.869 | glycerol-3-phosphate 1-O-acyltransferase, putative    |
| PVVCY_1306100      | 3.117 | 2.315 | 3.019 | 3.688 | 17.870 | conserved Plasmodium protein, unknown function        |
| PVVCY_0301140      | 1.635 | 0.804 | 1.502 | 2.165 | 17.874 | conserved Plasmodium protein, unknown function        |
| PVVCY_1104090      | 1.416 | 0.946 | 1.324 | 1.685 | 17.878 | nuclear fusion protein, putative                      |
| PVVCY_1400220      | 4.700 | 2.854 | 4.802 | 6.686 | 17.886 | fam-a protein                                         |
| PVVCY_1001260      | 3.966 | 3.767 | 6.190 | 6.825 | 17.891 | conserved Plasmodium protein, unknown function        |
| PVVCY_0100380      | 1.186 | 1.132 | 2.065 | 2.325 | 17.894 | conserved Plasmodium protein, unknown function        |
| PVVCY_0200730      | 4.557 | 3.947 | 6.912 | 7.439 | 17.894 | conserved Plasmodium protein, unknown function        |
| PVVCY_0904680      | 6.580 | 4.947 | 6.260 | 7.535 | 17.895 | fam-a protein                                         |
| PVVCY_0904140      | 5.764 | 4.475 | 5.653 | 6.804 | 17.901 | transcription factor with AP2 domain(s), putative     |

|               |       |       |        |        |        |                                                           |
|---------------|-------|-------|--------|--------|--------|-----------------------------------------------------------|
| PVVCY_0400810 | 3.336 | 2.807 | 5.505  | 6.007  | 17.904 | serine_threonine protein kinase, putative                 |
| PVVCY_1203000 | 9.626 | 9.022 | 10.484 | 10.540 | 17.904 | Plasmodium exported protein (PHIST), unknown function     |
| PVVCY_1305430 | 5.465 | 3.083 | 5.201  | 7.289  | 17.910 | calcium-dependent protein kinase 5, putative              |
| PVVCY_1000340 | 5.973 | 5.805 | 6.629  | 6.780  | 17.922 | phosphoinositide-binding protein, putative                |
| PVVCY_0601160 | 4.254 | 3.470 | 5.086  | 6.702  | 17.925 | conserved Plasmodium protein, unknown function            |
| PVVCY_1302120 | 1.332 | 0.814 | 1.022  | 1.231  | 17.928 | transcription factor with AP2 domain(s), putative         |
| PVVCY_1403810 | 7.854 | 7.746 | 8.687  | 8.918  | 17.930 | heterochromatin protein 1, putative                       |
| PVVCY_0301270 | 7.665 | 4.836 | 6.911  | 9.003  | 17.933 | acyl-CoA synthetase, putative                             |
| PVVCY_1301790 | 5.614 | 5.107 | 4.907  | 4.707  | 17.937 | conserved Plasmodium protein, unknown function            |
| PVVCY_0401790 | 7.816 | 7.178 | 7.613  | 8.054  | 17.941 | ubiquitin specific protease, putative                     |
| PVVCY_0801750 | 4.958 | 3.598 | 5.077  | 6.581  | 17.944 | PPPDE peptidase, putative                                 |
| PVVCY_1100960 | 4.081 | 3.970 | 6.214  | 6.869  | 17.946 | structural maintenance of chromosomes protein 4, putative |
| PVVCY_0900460 | 1.607 | 1.477 | 2.511  | 2.760  | 17.947 | WD repeat-containing protein WRAP73, putative             |
| PVVCY_0401740 | 6.156 | 5.666 | 6.168  | 6.001  | 17.948 | nucleoporin NUP100/NSP100, putative                       |
| PVVCY_1103610 | 6.050 | 5.172 | 5.412  | 5.663  | 17.948 | zinc finger protein, putative                             |
| PVVCY_0901830 | 8.609 | 7.585 | 7.604  | 7.635  | 17.951 | conserved Plasmodium protein, unknown function            |
| PVVCY_1100890 | 3.507 | 2.265 | 3.212  | 4.192  | 17.960 | transcription factor IIb, putative                        |
| PVVCY_0301450 | 1.854 | 0.828 | 1.669  | 2.541  | 17.962 | conserved Plasmodium protein, unknown function            |
| PVVCY_1305110 | 6.305 | 5.952 | 7.805  | 8.176  | 17.965 | histone H3-like centromeric protein CSE4, putative        |
| PVVCY_1202300 | 6.209 | 6.061 | 7.078  | 7.313  | 17.969 | regulator of chromosome condensation, putative            |
| PVVCY_1201800 | 4.471 | 3.571 | 7.012  | 7.542  | 17.973 | protein kinase, putative                                  |
| PVVCY_0101430 | 2.730 | 2.329 | 3.274  | 3.317  | 17.975 | fam-a protein                                             |
| PVVCY_1400620 | 1.663 | 1.011 | 3.794  | 4.277  | 17.980 | conserved Plasmodium protein, unknown function            |
| PVVCY_1300990 | 8.972 | 8.482 | 8.746  | 9.031  | 17.989 | 1-acyl-sn-glycerol-3-phosphate acyltransferase, putative  |
| PVVCY_0802590 | 3.352 | 3.026 | 3.988  | 4.990  | 17.993 | dynein light chain, putative                              |
| PVVCY_0904440 | 7.288 | 6.493 | 6.570  | 6.674  | 17.997 | conserved Plasmodium protein, unknown function            |
| PVVCY_0100760 | 5.525 | 4.677 | 7.316  | 7.629  | 17.997 | conserved Plasmodium protein, unknown function            |



|               |        |       |       |        |        |                                                            |
|---------------|--------|-------|-------|--------|--------|------------------------------------------------------------|
| PVVCY_0803050 | 5.083  | 4.690 | 6.831 | 7.282  | 17.997 | protein MAM3, putative                                     |
| PVVCY_0602240 | 3.313  | 2.603 | 5.429 | 5.898  | 18.000 | protein kinase, putative                                   |
| PVVCY_0401170 | 1.726  | 0.942 | 1.267 | 1.629  | 18.001 | conserved Plasmodium protein, unknown function             |
| PVVCY_1302100 | 6.427  | 5.577 | 5.657 | 5.770  | 18.004 | LCCL domain-containing protein                             |
| PVVCY_0801760 | 1.361  | 0.371 | 1.250 | 2.199  | 18.007 | thioredoxin-like protein 1, putative                       |
| PVVCY_1305520 | 5.696  | 4.907 | 7.816 | 8.265  | 18.009 | conserved Plasmodium protein, unknown function             |
| PVVCY_0602370 | 8.168  | 5.676 | 7.461 | 9.410  | 18.009 | Plasmodium exported protein, unknown function              |
| PVVCY_1203520 | 4.578  | 4.088 | 5.023 | 5.011  | 18.013 | carbon catabolite repressor protein 4, putative            |
| PVVCY_1202170 | 2.778  | 2.144 | 5.007 | 5.547  | 18.015 | conserved Plasmodium protein, unknown function             |
| PVVCY_1002580 | 2.655  | 2.333 | 5.204 | 5.954  | 18.017 | conserved Plasmodium protein, unknown function             |
| PVVCY_0602450 | 8.010  | 5.835 | 7.454 | 9.233  | 18.018 | fam-a protein                                              |
| PVVCY_1000660 | 7.895  | 7.421 | 7.374 | 7.044  | 18.021 | E3 ubiquitin-protein ligase, putative                      |
| PVVCY_0903260 | 1.882  | 1.440 | 3.464 | 3.853  | 18.022 | conserved Plasmodium protein, unknown function             |
| PVVCY_1301370 | 5.562  | 5.409 | 6.392 | 6.622  | 18.026 | conserved Plasmodium protein, unknown function             |
| PVVCY_1300550 | 8.050  | 7.653 | 8.280 | 8.230  | 18.036 | vesicle-associated membrane protein, putative              |
| PVVCY_0100520 | 6.737  | 6.495 | 6.985 | 6.992  | 18.045 | RNA-binding protein, putative                              |
| PVVCY_1405640 | 2.799  | 2.474 | 4.939 | 5.567  | 18.057 | conserved Plasmodium protein, unknown function             |
| PVVCY_1202120 | 8.049  | 7.899 | 8.364 | 8.424  | 18.057 | lysophospholipase, putative                                |
| PVVCY_1404010 | 8.710  | 8.303 | 8.999 | 8.970  | 18.067 | CAMP-dependent protein kinase regulatory subunit, putative |
| PVVCY_1203050 | 4.965  | 4.413 | 4.827 | 5.285  | 18.067 | endonuclease III homologue, putative                       |
| PVVCY_1300220 | 2.047  | 1.304 | 1.720 | 2.189  | 18.070 | tubulin epsilon chain, putative                            |
| PVVCY_1002910 | 3.556  | 2.921 | 6.236 | 6.960  | 18.073 | conserved Plasmodium protein, unknown function             |
| PVVCY_0200870 | 7.931  | 6.730 | 8.074 | 9.538  | 18.073 | StAR-related lipid transfer protein                        |
| PVVCY_1400190 | 10.135 | 6.950 | 8.942 | 11.233 | 18.095 | erythrocyte membrane antigen 1                             |
| PVVCY_1003990 | 1.825  | 1.691 | 2.114 | 2.570  | 18.095 | conserved Plasmodium protein, unknown function             |
| PVVCY_1101160 | 2.305  | 1.784 | 2.002 | 2.262  | 18.096 | stearoyl-CoA desaturase, putative                          |
| PVVCY_1302770 | 1.844  | 0.978 | 1.264 | 1.618  | 18.097 | conserved Plasmodium protein, unknown function             |

|               |        |       |        |        |        |                                                     |
|---------------|--------|-------|--------|--------|--------|-----------------------------------------------------|
| PVVCY_0702040 | 3.980  | 2.123 | 3.908  | 5.914  | 18.101 | regulator of chromosome condensation, putative      |
| PVVCY_0502490 | 7.245  | 7.094 | 7.738  | 8.430  | 18.101 | tryptophan-rich protein tryptophan-rich antigen     |
| PVVCY_1202710 | 6.230  | 5.794 | 5.609  | 5.439  | 18.103 | conserved Plasmodium protein, unknown function      |
| PVVCY_0101580 | 11.138 | 9.511 | 10.807 | 12.285 | 18.104 | fam-c protein                                       |
| PVVCY_1301810 | 2.501  | 1.603 | 2.495  | 2.222  | 18.105 | conserved Plasmodium protein, unknown function      |
| PVVCY_0201170 | 4.745  | 3.784 | 4.891  | 6.136  | 18.112 | conserved Plasmodium protein, unknown function      |
| PVVCY_1301850 | 2.889  | 2.587 | 4.938  | 5.564  | 18.113 | conserved Plasmodium protein, unknown function      |
| PVVCY_1300150 | 6.727  | 3.687 | 5.798  | 8.256  | 18.114 | fam-b protein                                       |
| PVVCY_1002220 | 3.891  | 3.694 | 5.761  | 6.358  | 18.116 | conserved Plasmodium protein, unknown function      |
| PVVCY_1000120 | 5.671  | 3.631 | 5.148  | 6.910  | 18.117 | erythrocyte membrane antigen 1                      |
| PVVCY_0300390 | 1.788  | 0.699 | 1.105  | 1.614  | 18.117 | conserved Plasmodium protein, unknown function      |
| PVVCY_1201270 | 6.730  | 6.325 | 6.744  | 7.223  | 18.125 | phosphoinositide-specific phospholipase C, putative |
| PVVCY_1403440 | 4.246  | 3.685 | 4.140  | 4.671  | 18.129 | perforin-like protein 2                             |
| PVVCY_1103240 | 2.261  | 1.736 | 1.428  | 1.136  | 18.129 | conserved Plasmodium protein, unknown function      |
| PVVCY_0901710 | 3.627  | 2.584 | 3.053  | 3.635  | 18.129 | conserved Plasmodium protein, unknown function      |
| PVVCY_1302690 | 5.307  | 4.542 | 4.706  | 4.939  | 18.130 | conserved Plasmodium protein, unknown function      |
| PVVCY_1405520 | 3.313  | 2.850 | 5.143  | 5.653  | 18.132 | conserved Plasmodium protein, unknown function      |
| PVVCY_1305150 | 4.014  | 3.825 | 5.219  | 5.590  | 18.135 | conserved Plasmodium protein, unknown function      |
| PVVCY_1003850 | 6.957  | 6.396 | 9.049  | 9.627  | 18.139 | conserved Plasmodium protein, unknown function      |
| PVVCY_0100460 | 4.956  | 4.196 | 4.401  | 4.683  | 18.139 | conserved Plasmodium protein, unknown function      |
| PVVCY_0901340 | 2.919  | 2.604 | 4.754  | 5.312  | 18.141 | conserved Plasmodium protein, unknown function      |
| PVVCY_1104770 | 10.535 | 7.207 | 9.117  | 11.470 | 18.149 | erythrocyte membrane associated protein 2, putative |
| PVVCY_0701660 | 1.006  | 0.000 | 0.956  | 2.081  | 18.153 | conserved Plasmodium protein, unknown function      |
| PVVCY_1004370 | 5.837  | 5.508 | 6.388  | 6.491  | 18.158 | translocation associated membrane protein, putative |
| PVVCY_1100740 | 6.150  | 5.528 | 7.333  | 7.576  | 18.158 | rhomoid protease ROM4, putative                     |
| PVVCY_0101410 | 6.633  | 5.110 | 6.442  | 8.028  | 18.159 | fam-a protein                                       |
| PVVCY_0701430 | 1.359  | 1.001 | 1.597  | 2.280  | 18.162 | conserved Plasmodium protein, unknown function      |

|               |        |       |       |        |        |                                                           |
|---------------|--------|-------|-------|--------|--------|-----------------------------------------------------------|
| PVVCY_1100540 | 4.590  | 3.937 | 6.482 | 6.976  | 18.168 | conserved protein, unknown function                       |
| PVVCY_0900210 | 7.105  | 4.297 | 6.024 | 8.183  | 18.171 | erythrocyte membrane antigen 1                            |
| PVVCY_0801860 | 5.259  | 4.526 | 4.675 | 5.027  | 18.173 | conserved Plasmodium protein, unknown function            |
| PVVCY_1000160 | 2.278  | 1.346 | 1.727 | 2.235  | 18.174 | chitinase, putative                                       |
| PVVCY_0800900 | 9.584  | 8.530 | 9.351 | 10.353 | 18.174 | translocon component PTEX150, putative                    |
| PVVCY_1303380 | 2.196  | 1.545 | 1.787 | 2.238  | 18.178 | conserved Plasmodium protein, unknown function            |
| PVVCY_0101480 | 3.865  | 2.737 | 3.835 | 5.154  | 18.178 | reticulocyte binding protein, putative                    |
| PVVCY_1400410 | 2.040  | 1.883 | 2.628 | 2.796  | 18.179 | conserved Plasmodium protein, unknown function            |
| PVVCY_0301720 | 2.680  | 1.975 | 5.115 | 5.795  | 18.179 | reticulocyte binding protein, putative                    |
| PVVCY_1406120 | 2.064  | 1.332 | 1.576 | 1.917  | 18.180 | conserved Plasmodium protein, unknown function            |
| PVVCY_1300100 | 7.448  | 4.781 | 6.775 | 9.237  | 18.181 | fam-a protein                                             |
| PVVCY_0602110 | 1.860  | 1.257 | 1.440 | 1.809  | 18.184 | conserved Plasmodium protein, unknown function            |
| PVVCY_1203950 | 10.179 | 9.600 | 9.373 | 9.229  | 18.185 | karyopherin beta, putative                                |
| PVVCY_1305870 | 2.123  | 1.058 | 2.063 | 3.283  | 18.188 | sporozoite protein essential for cell traversal, putative |
| PVVCY_1201520 | 5.717  | 5.018 | 5.513 | 6.295  | 18.188 | conserved Plasmodium protein, unknown function            |
| PVVCY_1402220 | 3.350  | 2.836 | 3.152 | 3.669  | 18.189 | conserved Plasmodium protein, unknown function            |
| PVVCY_0701080 | 1.947  | 1.044 | 1.483 | 2.063  | 18.190 | conserved Plasmodium protein, unknown function            |
| PVVCY_1302960 | 7.257  | 4.765 | 6.014 | 8.170  | 18.191 | fam-a protein                                             |
| PVVCY_1202430 | 2.966  | 2.657 | 4.725 | 5.278  | 18.192 | conserved Plasmodium protein, unknown function            |
| PVVCY_1303170 | 1.650  | 1.045 | 1.376 | 1.805  | 18.192 | dynein beta chain, putative                               |
| PVVCY_1002850 | 5.639  | 5.442 | 6.124 | 6.899  | 18.193 | conserved Plasmodium protein, unknown function            |
| PVVCY_1004060 | 6.505  | 5.462 | 5.606 | 6.041  | 18.195 | LCCL domain-containing protein                            |
| PVVCY_1300600 | 3.354  | 2.672 | 5.504 | 6.098  | 18.198 | conserved Plasmodium protein, unknown function            |
| PVVCY_0501100 | 1.707  | 1.223 | 1.116 | 1.103  | 18.200 | conserved Plasmodium protein, unknown function            |
| PVVCY_0700800 | 3.718  | 2.815 | 3.486 | 4.334  | 18.204 | dynein light chain 1, putative                            |
| PVVCY_0300270 | 2.015  | 1.313 | 1.792 | 2.569  | 18.207 | condensin-2 complex subunit H2, putative                  |
| PVVCY_1400110 | 8.583  | 6.312 | 7.623 | 9.845  | 18.211 | fam-c protein                                             |

|               |        |        |        |        |        |                                                            |
|---------------|--------|--------|--------|--------|--------|------------------------------------------------------------|
| PVVCY_0800080 | 12.700 | 10.372 | 11.569 | 13.664 | 18.211 | erythrocyte membrane antigen 1                             |
| PVVCY_0802300 | 3.656  | 2.958  | 3.366  | 3.904  | 18.213 | conserved Plasmodium protein, unknown function             |
| PVVCY_0600810 | 6.113  | 5.985  | 6.651  | 7.411  | 18.217 | cytosolic iron-sulfur protein assembly protein 1, putative |
| PVVCY_1404650 | 2.578  | 2.278  | 3.156  | 4.338  | 18.217 | conserved Plasmodium protein, unknown function             |
| PVVCY_0802180 | 7.025  | 6.284  | 6.532  | 7.035  | 18.217 | conserved Plasmodium protein, unknown function             |
| PVVCY_0301320 | 5.476  | 5.258  | 5.531  | 5.862  | 18.217 | conserved Plasmodium protein, unknown function             |
| PVVCY_0900070 | 2.065  | 2.095  | 2.613  | 3.190  | 18.218 | CIR protein PIR protein                                    |
| PVVCY_0901070 | 3.604  | 2.924  | 5.732  | 6.331  | 18.221 | conserved Plasmodium protein, unknown function             |
| PVVCY_0501950 | 8.230  | 7.292  | 10.720 | 11.385 | 18.223 | CCAT-binding transcription factor-like protein, putative   |
| PVVCY_0600670 | 3.318  | 2.857  | 2.716  | 2.615  | 18.227 | conserved Plasmodium protein, unknown function             |
| PVVCY_1200960 | 1.897  | 0.926  | 1.491  | 2.464  | 18.228 | conserved Plasmodium protein, unknown function             |
| PVVCY_1300040 | 9.634  | 7.113  | 8.784  | 10.979 | 18.228 | fam-a protein                                              |
| PVVCY_1002730 | 2.675  | 1.809  | 2.238  | 2.830  | 18.229 | dynein-associated protein, putative                        |
| PVVCY_0801250 | 5.528  | 4.213  | 5.558  | 7.240  | 18.230 | conserved Plasmodium protein, unknown function             |
| PVVCY_1401620 | 1.433  | 1.202  | 1.495  | 1.928  | 18.230 | inositol polyphosphate kinase, putative                    |
| PVVCY_1100210 | 6.791  | 4.604  | 6.325  | 8.544  | 18.233 | Plasmodium exported protein, unknown function              |
| PVVCY_1003800 | 8.315  | 7.542  | 8.017  | 8.653  | 18.234 | cytidine diphosphate-diacylglycerol synthase, putative     |
| PVVCY_0903320 | 4.989  | 4.635  | 5.009  | 5.479  | 18.239 | alpha_beta hydrolase, putative                             |
| PVVCY_1001650 | 1.759  | 0.997  | 1.348  | 1.844  | 18.239 | conserved Plasmodium protein, unknown function             |
| PVVCY_1304130 | 6.388  | 6.470  | 7.077  | 7.353  | 18.239 | plasmepsin V, putative                                     |
| PVVCY_0901260 | 3.132  | 2.280  | 2.984  | 3.895  | 18.243 | dynein light chain 2, putative                             |
| PVVCY_1305710 | 7.151  | 6.616  | 8.058  | 8.255  | 18.243 | ras-related protein Rab-11B, putative                      |
| PVVCY_1201400 | 1.890  | 1.171  | 1.353  | 1.655  | 18.246 | conserved Plasmodium protein, unknown function             |
| PVVCY_0501640 | 7.107  | 6.932  | 7.501  | 7.603  | 18.248 | mRNA-decapping enzyme subunit 1, putative                  |
| PVVCY_1004320 | 2.866  | 2.345  | 3.268  | 3.284  | 18.252 | secreted ookinete adhesive protein, putative               |
| PVVCY_1304400 | 3.981  | 3.017  | 3.691  | 4.592  | 18.252 | conserved Plasmodium protein, unknown function             |
| PVVCY_1103790 | 1.263  | 0.969  | 1.212  | 1.529  | 18.254 | guanylyl cyclase beta, putative                            |

|               |        |        |        |        |        |                                                                                      |
|---------------|--------|--------|--------|--------|--------|--------------------------------------------------------------------------------------|
| PVVCY_0701640 | 5.005  | 4.732  | 6.622  | 7.158  | 18.263 | conserved Plasmodium protein, unknown function                                       |
| PVVCY_1300110 | 5.330  | 2.743  | 4.492  | 6.868  | 18.265 | fam-a protein                                                                        |
| PVVCY_1304360 | 2.751  | 2.077  | 4.695  | 5.252  | 18.267 | conserved Plasmodium protein, unknown function                                       |
| PVVCY_1203850 | 10.479 | 10.101 | 9.886  | 9.696  | 18.267 | ABC transporter B family member 1, putative multidrug resistance protein 1, putative |
| PVVCY_0904020 | 4.786  | 3.761  | 7.088  | 7.693  | 18.269 | phd finger protein, putative                                                         |
| PVVCY_1303800 | 7.709  | 7.361  | 7.313  | 7.310  | 18.272 | conserved Plasmodium protein, unknown function                                       |
| PVVCY_1101450 | 2.523  | 1.487  | 1.983  | 2.709  | 18.274 | tubulin--tyrosine ligase, putative                                                   |
| PVVCY_0100600 | 4.017  | 3.001  | 3.444  | 4.284  | 18.278 | long chain polyunsaturated fatty acid elongation enzyme, putative                    |
| PVVCY_0100100 | 5.794  | 4.540  | 5.542  | 6.888  | 18.278 | fam-b protein                                                                        |
| PVVCY_1104620 | 4.498  | 3.596  | 3.764  | 4.224  | 18.279 | conserved Plasmodium protein, unknown function                                       |
| PVVCY_0902760 | 6.669  | 5.397  | 6.642  | 8.271  | 18.279 | fam-d protein                                                                        |
| PVVCY_1002320 | 2.817  | 2.071  | 2.472  | 3.051  | 18.283 | dynein-associated protein, putative                                                  |
| PVVCY_0700540 | 3.018  | 1.990  | 2.313  | 2.846  | 18.283 | ankyrin-repeat protein, putative                                                     |
| PVVCY_0401410 | 1.642  | 0.997  | 1.131  | 1.385  | 18.285 | circumsporozoite- and TRAP-related protein, putative                                 |
| PVVCY_1403660 | 4.329  | 3.095  | 3.534  | 4.235  | 18.286 | secreted ookinete protein, putative                                                  |
| PVVCY_0300080 | 6.711  | 4.499  | 5.889  | 8.279  | 18.287 | fam-b protein                                                                        |
| PVVCY_0401720 | 2.357  | 1.720  | 2.138  | 2.722  | 18.287 | dynein heavy chain, putative                                                         |
| PVVCY_1104250 | 2.478  | 1.252  | 1.907  | 2.861  | 18.291 | conserved Plasmodium protein, unknown function                                       |
| PVVCY_1201670 | 1.432  | 0.956  | 1.133  | 1.494  | 18.296 | conserved Plasmodium protein, unknown function                                       |
| PVVCY_1301430 | 5.712  | 3.869  | 4.957  | 6.520  | 18.297 | gamete egress and sporozoite traversal protein, putative                             |
| PVVCY_1301330 | 6.574  | 5.402  | 5.945  | 6.770  | 18.299 | ABC transporter B family member 2, putative multidrug resistance protein 2, putative |
| PVVCY_1406750 | 6.408  | 3.919  | 5.257  | 7.684  | 18.299 | fam-b protein                                                                        |
| PVVCY_0602280 | 4.648  | 3.671  | 3.825  | 4.165  | 18.299 | kinesin-19, putative                                                                 |
| PVVCY_0601930 | 2.882  | 2.470  | 4.999  | 5.704  | 18.303 | conserved Plasmodium protein, unknown function                                       |
| PVVCY_0501750 | 12.055 | 11.583 | 11.931 | 11.770 | 18.303 | early transcribed membrane protein                                                   |
| PVVCY_1304600 | 2.127  | 1.592  | 3.960  | 4.528  | 18.303 | conserved Plasmodium protein, unknown function                                       |

|               |        |        |        |        |        |                                                                  |
|---------------|--------|--------|--------|--------|--------|------------------------------------------------------------------|
| PVVCY_0600970 | 4.177  | 3.276  | 3.404  | 3.829  | 18.307 | kinesin-7, putative                                              |
| PVVCY_0400490 | 2.422  | 1.797  | 2.269  | 2.925  | 18.308 | P-loop containing nucleoside triphosphate hydrolase, putative    |
| PVVCY_0500070 | 1.832  | 1.561  | 2.100  | 2.878  | 18.315 | PIR protein CIR protein                                          |
| PVVCY_1102820 | 11.581 | 10.314 | 11.070 | 12.180 | 18.319 | choline_ethanolaminephosphotransferase, putative                 |
| PVVCY_1104640 | 7.865  | 5.510  | 6.826  | 9.240  | 18.321 | Plasmodium exported protein (PHIST), unknown function            |
| PVVCY_1300720 | 6.071  | 5.389  | 6.002  | 6.845  | 18.324 | acid cluster protein 33 homologue, putative                      |
| PVVCY_0800620 | 7.217  | 7.030  | 7.300  | 7.651  | 18.324 | zinc finger, RAN binding protein, putative                       |
| PVVCY_0601730 | 2.625  | 1.675  | 1.977  | 2.658  | 18.327 | LEM3 CDC50 family protein, putative                              |
| PVVCY_0300770 | 3.000  | 2.297  | 5.361  | 6.105  | 18.328 | transporter, putative                                            |
| PVVCY_0500840 | 2.393  | 1.576  | 1.806  | 2.224  | 18.329 | conserved Plasmodium protein, unknown function                   |
| PVVCY_1303230 | 6.479  | 5.359  | 6.075  | 7.123  | 18.330 | transcription factor with AP2 domain(s), putative                |
| PVVCY_0601050 | 8.980  | 8.095  | 8.177  | 8.554  | 18.331 | non-SERCA-type Ca <sup>2+</sup> -transporting P-ATPase, putative |
| PVVCY_0700370 | 3.048  | 2.471  | 5.090  | 5.743  | 18.332 | conserved Plasmodium protein, unknown function                   |
| PVVCY_0701980 | 1.195  | 0.662  | 0.930  | 1.444  | 18.333 | conserved Plasmodium protein, unknown function                   |
| PVVCY_1400670 | 1.960  | 1.282  | 1.446  | 1.769  | 18.340 | conserved Plasmodium protein, unknown function                   |
| PVVCY_0701340 | 6.189  | 5.634  | 6.127  | 6.816  | 18.340 | conserved Plasmodium protein, unknown function                   |
| PVVCY_1203110 | 6.354  | 5.888  | 6.373  | 7.040  | 18.345 | ribonuclease, putative                                           |
| PVVCY_1203080 | 1.586  | 0.785  | 0.904  | 1.199  | 18.346 | enoyl-acyl carrier reductase, putative                           |
| PVVCY_1102500 | 2.177  | 1.174  | 1.781  | 2.696  | 18.349 | GAS8-like protein, putative                                      |
| PVVCY_0700990 | 5.932  | 5.844  | 6.726  | 7.015  | 18.354 | 2-oxoglutarate dehydrogenase E1 component, putative              |
| PVVCY_1102460 | 7.669  | 7.737  | 8.298  | 8.558  | 18.356 | SNF2 helicase, putative                                          |
| PVVCY_0902800 | 1.909  | 1.342  | 3.613  | 4.149  | 18.356 | conserved Plasmodium protein, unknown function                   |
| PVVCY_1000090 | 7.284  | 4.967  | 6.349  | 8.457  | 18.356 | fam-a protein                                                    |
| PVVCY_0901620 | 3.556  | 3.587  | 5.236  | 5.897  | 18.358 | conserved Plasmodium protein, unknown function                   |
| PVVCY_1400250 | 5.456  | 4.248  | 5.347  | 6.904  | 18.360 | early transcribed membrane protein                               |
| PVVCY_0901510 | 8.565  | 8.095  | 8.695  | 9.509  | 18.360 | heat shock protein 101, putative                                 |
| PVVCY_1000940 | 3.533  | 2.709  | 5.160  | 5.611  | 18.361 | kinesin-5, putative                                              |

|                    |       |       |       |       |        |                                                                   |
|--------------------|-------|-------|-------|-------|--------|-------------------------------------------------------------------|
| PVVCY_1000450      | 7.359 | 6.857 | 7.037 | 6.802 | 18.368 | inositol-phosphate phosphatase, putative                          |
| PVVCY_0101380      | 7.655 | 5.912 | 6.901 | 8.447 | 18.368 | major facilitator superfamily-related transporter, putative       |
| PVVCY_1000370      | 3.706 | 3.558 | 4.415 | 4.660 | 18.370 | phosphopantetheine adenylyltransferase, putative                  |
| PVVCY_0903000      | 1.435 | 0.540 | 1.068 | 1.894 | 18.378 | conserved Plasmodium protein, unknown function                    |
| PVVCY_1405510      | 3.081 | 2.765 | 4.283 | 4.687 | 18.378 | conserved Plasmodium protein, unknown function                    |
| PVVCY_1300240      | 6.918 | 5.936 | 6.063 | 6.423 | 18.379 | LCCL domain-containing protein                                    |
| PVVCY_0300010      | 3.649 | 1.039 | 2.395 | 4.583 | 18.379 | fam-a protein                                                     |
| PVVCY_0400510      | 7.034 | 6.853 | 7.049 | 7.325 | 18.380 | conserved Plasmodium protein, unknown function                    |
| PVVCY_1200790      | 7.643 | 5.538 | 6.848 | 8.878 | 18.381 | Plasmodium exported protein, unknown function                     |
| PVVCY_1306950      | 2.645 | 0.429 | 1.540 | 3.354 | 18.382 | fam-a protein                                                     |
| PVVCY_0903330      | 6.736 | 6.305 | 6.067 | 5.889 | 18.385 | DNA-directed RNA polymerase I subunit RPA2, putative              |
| PVVCY_1403420      | 7.469 | 6.149 | 6.917 | 8.131 | 18.385 | male development gene 1, putative                                 |
| PVVCY_1300570      | 4.157 | 3.226 | 5.724 | 6.144 | 18.386 | conserved Plasmodium protein, unknown function                    |
| PVVCY_1100690      | 6.726 | 5.704 | 5.687 | 5.884 | 18.387 | conserved Plasmodium protein, unknown function                    |
| PVVCY_0500780      | 2.505 | 1.885 | 2.184 | 2.680 | 18.388 | dynein heavy chain, putative                                      |
| PVVCY_1104000      | 3.269 | 2.607 | 2.693 | 3.017 | 18.388 | conserved Plasmodium protein, unknown function                    |
| PVVCY_0803300      | 6.427 | 5.142 | 6.050 | 7.657 | 18.390 | conserved Plasmodium protein, unknown function                    |
| PVVCY_0200910      | 4.628 | 3.678 | 4.063 | 4.737 | 18.391 | actin-related protein                                             |
| PVVCY_0200560      | 3.044 | 2.155 | 2.315 | 2.814 | 18.394 | serine_threonine protein kinase, putative                         |
| PVVCY_1404110      | 4.523 | 3.766 | 6.928 | 7.719 | 18.394 | conserved Plasmodium protein, unknown function                    |
| PVVCY_1306860      | 8.129 | 7.075 | 8.064 | 9.500 | 18.394 | fam-b protein                                                     |
| PVVCY_0500110.gene | 5.579 | 4.994 | 5.565 | 6.391 | 18.398 | #N/A                                                              |
| PVVCY_0101070      | 6.860 | 6.324 | 6.575 | 7.002 | 18.400 | SNARE associated Golgi protein, putative                          |
| PVVCY_1203220      | 6.657 | 5.917 | 5.943 | 6.140 | 18.403 | major facilitator superfamily domain-containing protein, putative |
| PVVCY_1101120      | 4.581 | 3.796 | 3.952 | 4.416 | 18.403 | conserved Plasmodium protein, unknown function                    |
| PVVCY_1406520      | 7.978 | 7.155 | 7.476 | 8.054 | 18.403 | conserved Plasmodium protein, unknown function                    |
| PVVCY_1404440      | 4.956 | 4.009 | 6.973 | 7.578 | 18.405 | conserved Plasmodium protein, unknown function                    |

|               |       |       |       |       |        |                                                         |
|---------------|-------|-------|-------|-------|--------|---------------------------------------------------------|
| PVVCY_1000850 | 2.943 | 1.984 | 2.368 | 3.203 | 18.414 | conserved Plasmodium protein, unknown function          |
| PVVCY_0900380 | 2.399 | 1.756 | 2.021 | 2.592 | 18.415 | WD repeat-containing protein, putative                  |
| PVVCY_0401690 | 1.935 | 1.186 | 1.541 | 2.267 | 18.417 | WD repeat-containing protein 66, putative               |
| PVVCY_0800570 | 4.293 | 3.636 | 6.415 | 7.132 | 18.422 | conserved Plasmodium protein, unknown function          |
| PVVCY_1200070 | 1.860 | 0.199 | 1.060 | 2.786 | 18.426 | acyl-CoA synthetase, putative                           |
| PVVCY_0802460 | 1.662 | 0.812 | 1.132 | 1.857 | 18.430 | protein kinase, putative                                |
| PVVCY_1303820 | 2.950 | 2.503 | 2.996 | 3.820 | 18.437 | conserved Plasmodium protein, unknown function          |
| PVVCY_0300870 | 2.079 | 1.445 | 1.285 | 0.843 | 18.446 | conserved Plasmodium protein, unknown function          |
| PVVCY_1103710 | 1.584 | 1.116 | 3.396 | 4.038 | 18.446 | conserved Plasmodium protein, unknown function          |
| PVVCY_1402130 | 4.224 | 3.012 | 6.497 | 7.193 | 18.459 | 3',5'-cyclic nucleotide phosphodiesterase, putative     |
| PVVCY_0101340 | 4.975 | 4.009 | 7.371 | 8.164 | 18.459 | transcription factor with AP2 domain(s), putative       |
| PVVCY_0501970 | 6.867 | 5.520 | 9.171 | 9.860 | 18.466 | conserved Plasmodium protein, unknown function          |
| PVVCY_0400260 | 2.242 | 1.734 | 4.207 | 4.914 | 18.467 | palmitoyltransferase DHHC1, putative                    |
| PVVCY_0801560 | 1.316 | 0.615 | 2.148 | 2.366 | 18.487 | conserved Plasmodium membrane protein, unknown function |
| PVVCY_1101660 | 4.680 | 4.254 | 6.718 | 7.481 | 18.488 | kinetochore protein NDC80, putative                     |
| PVVCY_0903030 | 5.962 | 5.384 | 5.424 | 5.690 | 18.497 | conserved Plasmodium protein, unknown function          |
| PVVCY_0502240 | 7.457 | 6.039 | 6.685 | 8.088 | 18.498 | transcription factor with AP2 domain(s), putative       |
| PVVCY_0602230 | 2.762 | 1.736 | 2.083 | 2.936 | 18.500 | conserved Plasmodium protein, unknown function          |
| PVVCY_0803510 | 3.160 | 1.428 | 2.457 | 4.505 | 18.502 | fam-c protein                                           |
| PVVCY_1302900 | 5.354 | 4.179 | 4.850 | 6.204 | 18.502 | fam-a protein                                           |
| PVVCY_1306470 | 2.493 | 1.602 | 1.753 | 2.289 | 18.502 | E1-E2 ATPase, putative                                  |
| PVVCY_1100530 | 2.853 | 2.671 | 4.381 | 4.984 | 18.506 | conserved Plasmodium protein, unknown function          |
| PVVCY_0601550 | 5.174 | 4.174 | 6.772 | 7.263 | 18.506 | calcium-dependent protein kinase 4, putative            |
| PVVCY_1305140 | 2.538 | 2.368 | 4.431 | 5.187 | 18.508 | conserved Plasmodium protein, unknown function          |
| PVVCY_1300580 | 4.139 | 3.202 | 6.338 | 7.091 | 18.508 | conserved Plasmodium protein, unknown function          |
| PVVCY_1405420 | 4.660 | 4.879 | 6.454 | 7.236 | 18.508 | conserved Plasmodium protein, unknown function          |
| PVVCY_1405190 | 1.619 | 1.185 | 1.874 | 1.908 | 18.518 | inorganic pyrophosphatase, putative                     |



|               |        |        |        |        |        |                                                |
|---------------|--------|--------|--------|--------|--------|------------------------------------------------|
| PVVCY_1403830 | 4.842  | 4.019  | 4.059  | 4.429  | 18.518 | conserved Plasmodium protein, unknown function |
| PVVCY_0300300 | 2.677  | 1.925  | 2.572  | 3.753  | 18.518 | conserved Plasmodium protein, unknown function |
| PVVCY_1302010 | 7.924  | 7.288  | 7.253  | 7.447  | 18.518 | conserved Plasmodium protein, unknown function |
| PVVCY_1305180 | 8.821  | 7.487  | 10.944 | 11.611 | 18.522 | MSP7-like protein                              |
| PVVCY_0200480 | 12.548 | 11.208 | 11.687 | 12.875 | 18.530 | conserved Plasmodium protein, unknown function |
| PVVCY_1303690 | 8.216  | 7.641  | 7.537  | 7.616  | 18.534 | inorganic anion antiporter, putative           |
| PVVCY_1203420 | 7.006  | 6.649  | 7.118  | 7.107  | 18.535 | ATP-dependent RNA helicase DDX23, putative     |
| PVVCY_0900730 | 4.239  | 3.318  | 3.382  | 3.833  | 18.536 | mechanosensitive ion channel protein, putative |
| PVVCY_0903910 | 6.501  | 5.468  | 5.716  | 6.477  | 18.543 | conserved Plasmodium protein, unknown function |
| PVVCY_0902610 | 6.358  | 5.866  | 5.936  | 6.231  | 18.544 | conserved Plasmodium protein, unknown function |
| PVVCY_1400790 | 7.246  | 6.693  | 7.029  | 7.721  | 18.544 | conserved Plasmodium protein, unknown function |
| PVVCY_0702080 | 2.069  | 1.199  | 1.574  | 2.449  | 18.545 | conserved Plasmodium protein, unknown function |
| PVVCY_0402080 | 4.146  | 1.753  | 2.727  | 5.055  | 18.546 | fam-a protein                                  |
| PVVCY_1303740 | 5.805  | 4.934  | 4.988  | 5.415  | 18.547 | conserved Plasmodium protein, unknown function |
| PVVCY_0201350 | 3.722  | 3.841  | 4.449  | 5.255  | 18.549 | conserved Plasmodium protein, unknown function |
| PVVCY_1102640 | 3.282  | 2.477  | 5.073  | 5.707  | 18.552 | Sec14 protein, putative                        |
| PVVCY_1306810 | 6.317  | 6.170  | 6.585  | 6.676  | 18.554 | conserved Plasmodium protein, unknown function |
| PVVCY_0401240 | 3.724  | 2.756  | 3.034  | 3.822  | 18.554 | conserved Plasmodium protein, unknown function |
| PVVCY_0701940 | 3.009  | 2.139  | 2.363  | 3.034  | 18.555 | conserved Plasmodium protein, unknown function |
| PVVCY_1300690 | 3.479  | 2.333  | 4.586  | 4.879  | 18.555 | serine threonine protein kinase, putative      |
| PVVCY_0902850 | 3.243  | 3.360  | 3.908  | 4.632  | 18.559 | conserved Plasmodium protein, unknown function |
| PVVCY_1304720 | 7.441  | 6.632  | 6.911  | 7.639  | 18.560 | conserved Plasmodium protein, unknown function |
| PVVCY_0702010 | 9.513  | 9.141  | 9.448  | 10.035 | 18.561 | conserved Plasmodium protein, unknown function |
| PVVCY_1004290 | 2.172  | 1.750  | 1.902  | 2.292  | 18.561 | adenylyl cyclase alpha, putative               |
| PVVCY_0800280 | 1.104  | 1.115  | 1.797  | 2.758  | 18.563 | conserved Plasmodium protein, unknown function |
| PVVCY_1202640 | 5.932  | 5.057  | 5.100  | 5.525  | 18.564 | conserved Plasmodium protein, unknown function |
| PVVCY_1306290 | 3.135  | 2.828  | 5.226  | 6.070  | 18.565 | conserved Plasmodium protein, unknown function |

|               |        |       |        |        |        |                                                                       |
|---------------|--------|-------|--------|--------|--------|-----------------------------------------------------------------------|
| PVVCY_1403260 | 6.439  | 4.938 | 5.488  | 6.894  | 18.565 | conserved Plasmodium protein, unknown function                        |
| PVVCY_0903620 | 1.849  | 1.198 | 1.486  | 2.167  | 18.566 | calcium-binding protein, putative                                     |
| PVVCY_1305800 | 6.305  | 5.666 | 5.691  | 5.995  | 18.567 | inner membrane complex protein 1k, putative                           |
| PVVCY_1104530 | 5.364  | 5.119 | 6.186  | 6.499  | 18.567 | conserved Plasmodium protein, unknown function                        |
| PVVCY_0100220 | 4.970  | 4.599 | 4.434  | 4.356  | 18.568 | conserved Plasmodium protein, unknown function                        |
| PVVCY_1300210 | 7.865  | 6.245 | 6.910  | 8.532  | 18.569 | fam-a protein                                                         |
| PVVCY_1304710 | 3.411  | 2.510 | 5.532  | 6.302  | 18.569 | AMP deaminase, putative                                               |
| PVVCY_1400770 | 1.623  | 0.000 | 3.866  | 4.592  | 18.580 | conserved Plasmodium protein, unknown function                        |
| PVVCY_0500650 | 4.481  | 3.711 | 6.814  | 7.703  | 18.581 | schizont egress antigen-1, putative                                   |
| PVVCY_1405410 | 3.140  | 2.370 | 3.283  | 3.233  | 18.581 | conserved Plasmodium protein, unknown function                        |
| PVVCY_0803320 | 9.125  | 8.771 | 9.467  | 9.563  | 18.583 | cAMP-dependent protein kinase catalytic subunit, putative             |
| PVVCY_1403730 | 3.897  | 2.915 | 4.528  | 4.663  | 18.593 | zinc finger protein, putative                                         |
| PVVCY_1401850 | 4.305  | 4.174 | 5.984  | 6.692  | 18.601 | structural maintenance of chromosomes protein 2, putative             |
| PVVCY_0200990 | 2.828  | 1.754 | 4.528  | 5.117  | 18.602 | vacuolar protein sorting-associated protein VTA1, putative            |
| PVVCY_0800840 | 5.210  | 4.530 | 4.556  | 4.881  | 18.610 | conserved Plasmodium protein, unknown function                        |
| PVVCY_0600590 | 2.369  | 1.748 | 2.338  | 2.242  | 18.611 | conserved Plasmodium protein, unknown function                        |
| PVVCY_0700040 | 9.430  | 8.653 | 8.976  | 9.767  | 18.614 | Plasmodium exported protein, unknown function                         |
| PVVCY_1406090 | 2.991  | 1.662 | 1.994  | 3.040  | 18.620 | kinesin, putative                                                     |
| PVVCY_1103320 | 6.267  | 5.961 | 5.879  | 5.891  | 18.622 | NLI interacting factor-like phosphatase, putative                     |
| PVVCY_0802870 | 8.914  | 7.083 | 11.045 | 11.739 | 18.623 | merozoite surface protein 1                                           |
| PVVCY_1000330 | 3.716  | 2.955 | 6.047  | 6.968  | 18.625 | conserved Plasmodium protein, unknown function                        |
| PVVCY_1303970 | 10.031 | 9.238 | 9.252  | 9.618  | 18.628 | protein transport protein SFT2, putative                              |
| PVVCY_1102140 | 6.886  | 6.060 | 6.122  | 6.571  | 18.630 | Pfs77 homologue, putative inner membrane complex protein 1j, putative |
| PVVCY_1004360 | 2.145  | 1.585 | 1.768  | 2.275  | 18.633 | nuclear formin-like protein, putative                                 |
| PVVCY_1104910 | 2.894  | 0.692 | 1.500  | 3.641  | 18.637 | fam-a protein                                                         |
| PVVCY_0200820 | 1.633  | 0.832 | 1.281  | 2.284  | 18.638 | major facilitator superfamily-related transporter, putative           |
| PVVCY_1305770 | 1.561  | 0.521 | 0.703  | 1.428  | 18.640 | inner membrane complex suture component, putative                     |

|               |        |       |        |        |        |                                                     |
|---------------|--------|-------|--------|--------|--------|-----------------------------------------------------|
| PVVCY_0100090 | 11.951 | 9.823 | 10.647 | 12.791 | 18.642 | fam-a protein                                       |
| PVVCY_0902830 | 1.528  | 0.943 | 1.258  | 1.976  | 18.645 | phosphatidylinositol-4-phosphate 5-kinase, putative |
| PVVCY_1302510 | 1.677  | 1.194 | 1.427  | 1.981  | 18.646 | biotin protein ligase, putative                     |
| PVVCY_1204360 | 7.952  | 7.439 | 7.880  | 7.787  | 18.646 | AP-1 complex subunit beta, putative                 |
| PVVCY_1403710 | 3.093  | 2.116 | 2.604  | 3.752  | 18.647 | raf kinase inhibitor, putative                      |
| PVVCY_1406150 | 6.610  | 6.085 | 6.566  | 7.503  | 18.649 | conserved Plasmodium protein, unknown function      |
| PVVCY_1304860 | 4.227  | 3.193 | 3.946  | 5.511  | 18.651 | protein kinase, putative                            |
| PVVCY_1101590 | 5.553  | 4.834 | 4.865  | 5.237  | 18.653 | conserved Plasmodium protein, unknown function      |
| PVVCY_0901330 | 1.451  | 1.037 | 2.882  | 3.465  | 18.654 | glycerol-3-phosphate dehydrogenase, putative        |
| PVVCY_1203060 | 6.300  | 5.592 | 6.005  | 6.932  | 18.656 | conserved Plasmodium protein, unknown function      |
| PVVCY_1404120 | 4.979  | 4.690 | 5.064  | 5.742  | 18.658 | BRO1 domain-containing protein, putative            |
| PVVCY_0903710 | 2.452  | 1.609 | 4.270  | 4.979  | 18.659 | guanylyl cyclase, putative                          |
| PVVCY_1301360 | 1.505  | 1.031 | 1.281  | 1.865  | 18.660 | condensin-2 complex subunit G2, putative            |
| PVVCY_0700720 | 7.506  | 7.158 | 7.590  | 7.588  | 18.662 | histone acetyltransferase GCN5, putative            |
| PVVCY_1406510 | 4.732  | 3.136 | 3.609  | 5.060  | 18.674 | osmiophilic body protein G377, putative             |
| PVVCY_1104260 | 7.994  | 7.623 | 7.883  | 8.442  | 18.674 | SNARE associated Golgi protein, putative            |
| PVVCY_0901550 | 1.210  | 1.236 | 1.945  | 2.276  | 18.675 | conserved Plasmodium protein, unknown function      |
| PVVCY_0502110 | 1.865  | 0.974 | 1.359  | 2.350  | 18.676 | conserved Plasmodium protein, unknown function      |
| PVVCY_1100860 | 3.179  | 1.954 | 5.230  | 6.013  | 18.676 | SET domain protein, putative                        |
| PVVCY_1004020 | 6.067  | 6.269 | 6.486  | 6.711  | 18.678 | conserved Plasmodium protein, unknown function      |
| PVVCY_0803040 | 7.483  | 5.657 | 8.801  | 9.195  | 18.678 | conserved Plasmodium protein, unknown function      |
| PVVCY_1405550 | 8.341  | 7.700 | 7.926  | 8.565  | 18.679 | acyl-CoA synthetase, putative                       |
| PVVCY_0501900 | 5.030  | 4.524 | 6.719  | 7.421  | 18.681 | ADP-ribosylation factor, putative                   |
| PVVCY_1305210 | 1.592  | 0.837 | 1.110  | 1.876  | 18.681 | DNA replication complex GINS protein, putative      |
| PVVCY_1402810 | 7.797  | 6.908 | 7.687  | 7.544  | 18.683 | CCR4-associated factor 1, putative                  |
| PVVCY_0501680 | 9.597  | 9.281 | 9.004  | 8.746  | 18.685 | DER1-like protein, putative                         |
| PVVCY_1404450 | 6.595  | 5.614 | 6.127  | 7.362  | 18.688 | conserved Plasmodium protein, unknown function      |

|               |       |       |       |       |        |                                                   |
|---------------|-------|-------|-------|-------|--------|---------------------------------------------------|
| PVVCY_1400960 | 7.588 | 6.767 | 6.646 | 6.865 | 18.689 | HORMA domain protein, putative                    |
| PVVCY_1102710 | 7.556 | 6.835 | 6.722 | 6.908 | 18.694 | conserved Plasmodium protein, unknown function    |
| PVVCY_0301520 | 4.218 | 4.033 | 4.606 | 4.763 | 18.696 | conserved Plasmodium protein, unknown function    |
| PVVCY_0902090 | 2.497 | 2.010 | 2.210 | 2.749 | 18.700 | dynein heavy chain, putative                      |
| PVVCY_0700550 | 4.134 | 3.494 | 5.575 | 6.170 | 18.716 | conserved Plasmodium protein, unknown function    |
| PVVCY_0803090 | 2.642 | 1.551 | 4.169 | 4.766 | 18.722 | palmitoyltransferase DHHC6, putative              |
| PVVCY_1002370 | 2.561 | 2.341 | 4.448 | 5.289 | 18.726 | conserved Plasmodium protein, unknown function    |
| PVVCY_1405430 | 6.131 | 5.637 | 6.264 | 6.283 | 18.733 | conserved Plasmodium protein, unknown function    |
| PVVCY_1303390 | 7.886 | 7.432 | 8.200 | 8.306 | 18.738 | conserved Plasmodium protein, unknown function    |
| PVVCY_0501700 | 6.653 | 6.398 | 6.780 | 6.818 | 18.740 | conserved Plasmodium protein, unknown function    |
| PVVCY_1004590 | 1.167 | 0.438 | 0.987 | 2.175 | 18.746 | acyl-CoA synthetase, putative                     |
| PVVCY_0801530 | 7.741 | 7.549 | 8.494 | 8.827 | 18.752 | conserved Plasmodium protein, unknown function    |
| PVVCY_1002500 | 4.357 | 3.323 | 3.323 | 3.849 | 18.752 | conserved Plasmodium protein, unknown function    |
| PVVCY_0502200 | 6.516 | 5.630 | 5.830 | 6.579 | 18.752 | zinc finger protein, putative                     |
| PVVCY_1201320 | 2.486 | 1.349 | 2.291 | 4.286 | 18.753 | GDP-L-fucose synthase, putative                   |
| PVVCY_0600610 | 7.357 | 6.855 | 6.904 | 7.234 | 18.754 | small subunit rRNA processing factor, putative    |
| PVVCY_1103190 | 7.712 | 6.641 | 6.810 | 7.611 | 18.755 | inositol-polyphosphate 5-phosphatase, putative    |
| PVVCY_1405910 | 4.128 | 3.037 | 5.930 | 6.681 | 18.757 | ubiquitin-conjugating enzyme E2, putative         |
| PVVCY_1003670 | 7.404 | 6.679 | 6.915 | 7.645 | 18.762 | rhomboid protease ROM8, putative                  |
| PVVCY_1202510 | 8.362 | 7.244 | 7.698 | 8.961 | 18.762 | DnaJ protein, putative                            |
| PVVCY_1202540 | 1.386 | 0.824 | 0.991 | 1.534 | 18.762 | C-mannosyltransferase, putative                   |
| PVVCY_1406440 | 4.433 | 3.904 | 4.403 | 5.437 | 18.767 | conserved Plasmodium protein, unknown function    |
| PVVCY_1102290 | 1.886 | 1.572 | 3.032 | 3.543 | 18.770 | transcription factor with AP2 domain(s), putative |
| PVVCY_1403350 | 3.473 | 2.655 | 2.924 | 3.763 | 18.772 | conserved Plasmodium protein, unknown function    |
| PVVCY_0502030 | 8.781 | 8.042 | 8.597 | 8.461 | 18.773 | conserved Plasmodium protein, unknown function    |
| PVVCY_0801470 | 3.751 | 2.807 | 4.839 | 5.284 | 18.779 | conserved Plasmodium protein, unknown function    |
| PVVCY_1301530 | 8.531 | 8.079 | 8.303 | 8.889 | 18.782 | serine_threonine protein kinase, putative         |

|               |        |        |        |        |        |                                                               |
|---------------|--------|--------|--------|--------|--------|---------------------------------------------------------------|
| PVVCY_0700280 | 6.057  | 5.248  | 6.966  | 7.338  | 18.783 | SET domain protein, putative                                  |
| PVVCY_0903970 | 4.216  | 3.932  | 5.939  | 6.729  | 18.789 | conserved Plasmodium protein, unknown function                |
| PVVCY_1302680 | 7.528  | 7.123  | 7.339  | 7.225  | 18.791 | splicing factor 3B subunit 2, putative                        |
| PVVCY_0903790 | 2.142  | 1.206  | 1.379  | 2.152  | 18.791 | AAA family ATPase, putative                                   |
| PVVCY_0100080 | 2.553  | 1.525  | 1.955  | 3.177  | 18.792 | CIR protein PIR protein                                       |
| PVVCY_1203030 | 2.098  | 1.882  | 2.623  | 3.884  | 18.793 | conserved Plasmodium protein, unknown function                |
| PVVCY_1302160 | 3.236  | 1.970  | 2.258  | 3.394  | 18.797 | conserved Plasmodium protein, unknown function                |
| PVVCY_0900670 | 8.540  | 7.973  | 8.013  | 7.732  | 18.800 | polyadenylate-binding protein-interacting protein 1, putative |
| PVVCY_1306280 | 4.818  | 3.298  | 3.693  | 5.141  | 18.801 | 6-cysteine protein                                            |
| PVVCY_1100700 | 3.517  | 2.928  | 4.299  | 4.633  | 18.802 | conserved Plasmodium protein, unknown function                |
| PVVCY_0901420 | 6.313  | 4.497  | 8.329  | 9.175  | 18.802 | rhoptry neck protein 4, putative                              |
| PVVCY_1100900 | 2.653  | 1.804  | 4.144  | 4.799  | 18.802 | guanidine nucleotide exchange factor, putative                |
| PVVCY_0800700 | 7.339  | 7.018  | 7.115  | 7.443  | 18.805 | U4_U6 small nuclear ribonucleoprotein PRP31, putative         |
| PVVCY_1401540 | 5.077  | 3.715  | 7.049  | 7.903  | 18.805 | conserved Plasmodium protein, unknown function                |
| PVVCY_0802240 | 7.224  | 6.839  | 6.841  | 7.062  | 18.814 | patatin-like phospholipase, putative                          |
| PVVCY_1306460 | 2.670  | 1.637  | 1.921  | 2.944  | 18.814 | WD repeat-containing protein 16, putative                     |
| PVVCY_0300250 | 5.669  | 5.169  | 5.110  | 5.299  | 18.817 | conserved Plasmodium protein, unknown function                |
| PVVCY_0602090 | 1.703  | 1.258  | 1.447  | 1.995  | 18.818 | conserved Plasmodium protein, unknown function                |
| PVVCY_0900430 | 10.976 | 11.166 | 12.399 | 13.085 | 18.820 | histone H4, putative                                          |
| PVVCY_0501060 | 4.091  | 2.579  | 6.035  | 6.883  | 18.820 | conserved Plasmodium protein, unknown function                |
| PVVCY_1402490 | 2.824  | 2.301  | 4.275  | 4.940  | 18.822 | phospholipase, putative                                       |
| PVVCY_1101610 | 3.596  | 2.262  | 2.532  | 3.720  | 18.824 | conserved Plasmodium protein, unknown function                |
| PVVCY_0401650 | 6.867  | 6.392  | 6.821  | 6.777  | 18.829 | conserved Plasmodium protein, unknown function                |
| PVVCY_0801570 | 3.771  | 2.316  | 5.568  | 6.358  | 18.830 | conserved Plasmodium protein, unknown function                |
| PVVCY_0900130 | 5.867  | 5.287  | 5.096  | 5.131  | 18.832 | early transcribed membrane protein                            |
| PVVCY_0401050 | 5.709  | 5.087  | 4.922  | 5.023  | 18.832 | plasmepsin VI, putative                                       |
| PVVCY_0903200 | 2.975  | 1.954  | 4.770  | 5.583  | 18.834 | LEM3_CDC50 family protein, putative                           |

|               |        |       |       |        |        |                                                                                      |
|---------------|--------|-------|-------|--------|--------|--------------------------------------------------------------------------------------|
| PVVCY_1302870 | 7.410  | 5.716 | 6.289 | 8.186  | 18.837 | fam-a protein                                                                        |
| PVVCY_1306110 | 8.153  | 7.831 | 8.297 | 9.222  | 18.837 | thioredoxin 2, putative                                                              |
| PVVCY_0602160 | 4.114  | 3.073 | 5.920 | 6.741  | 18.839 | conserved Plasmodium protein, unknown function                                       |
| PVVCY_1004440 | 2.484  | 1.757 | 1.947 | 2.676  | 18.841 | conserved Plasmodium protein, unknown function                                       |
| PVVCY_1403700 | 8.120  | 7.457 | 7.342 | 7.549  | 18.841 | aminophospholipid-transporting P-ATPase, putative                                    |
| PVVCY_1301490 | 2.396  | 1.915 | 4.351 | 5.270  | 18.844 | conserved Plasmodium protein, unknown function                                       |
| PVVCY_1306430 | 3.692  | 3.524 | 4.270 | 4.541  | 18.847 | conserved Plasmodium protein, unknown function                                       |
| PVVCY_0100570 | 1.723  | 0.980 | 1.162 | 1.897  | 18.851 | nucleoside diphosphate kinase, putative                                              |
| PVVCY_1405630 | 8.188  | 7.664 | 7.831 | 7.640  | 18.854 | ATP-dependent zinc metalloprotease FTSH 1, putative                                  |
| PVVCY_1402240 | 5.860  | 5.231 | 5.268 | 5.707  | 18.858 | palmitoyltransferase DHHC4, putative                                                 |
| PVVCY_1306080 | 6.142  | 5.928 | 6.883 | 7.233  | 18.859 | aspartate carbamoyltransferase, putative                                             |
| PVVCY_0901870 | 5.072  | 4.231 | 4.314 | 4.959  | 18.862 | conserved Plasmodium protein, unknown function                                       |
| PVVCY_0400710 | 4.096  | 3.320 | 5.970 | 6.852  | 18.863 | conserved Plasmodium protein, unknown function                                       |
| PVVCY_0100430 | 4.643  | 3.458 | 6.687 | 7.645  | 18.870 | transcription factor with AP2 domain(s), putative SPE2-interacting protein, putative |
| PVVCY_0904390 | 1.919  | 1.907 | 2.454 | 2.713  | 18.871 | conserved protein, unknown function                                                  |
| PVVCY_0101150 | 5.267  | 4.642 | 6.205 | 6.644  | 18.872 | conserved Plasmodium protein, unknown function                                       |
| PVVCY_1405370 | 3.680  | 3.363 | 5.435 | 6.280  | 18.874 | conserved Plasmodium protein, unknown function                                       |
| PVVCY_0903150 | 6.524  | 6.068 | 8.211 | 9.020  | 18.876 | aquaglyceroporin, putative                                                           |
| PVVCY_0101110 | 6.721  | 6.434 | 6.832 | 6.878  | 18.881 | SWIB_MDM2 domain-containing protein, putative                                        |
| PVVCY_0101240 | 7.260  | 5.834 | 9.097 | 9.962  | 18.884 | 6-cysteine protein                                                                   |
| PVVCY_0802290 | 2.700  | 1.928 | 4.406 | 5.225  | 18.887 | conserved Plasmodium protein, unknown function                                       |
| PVVCY_0500120 | 5.467  | 4.129 | 4.818 | 6.748  | 18.904 | lysophospholipase, putative                                                          |
| PVVCY_0401700 | 4.686  | 2.772 | 6.172 | 6.878  | 18.905 | conserved Plasmodium protein, unknown function                                       |
| PVVCY_1200950 | 10.278 | 8.315 | 9.168 | 11.757 | 18.907 | succinate dehydrogenase subunit 4, putative                                          |
| PVVCY_1306350 | 5.157  | 4.597 | 4.602 | 4.955  | 18.909 | conserved Plasmodium protein, unknown function                                       |
| PVVCY_1401610 | 6.236  | 5.544 | 5.465 | 5.769  | 18.916 | protein kinase, putative                                                             |
| PVVCY_1302760 | 1.937  | 1.183 | 1.295 | 1.952  | 18.920 | conserved Plasmodium protein, unknown function                                       |

|               |        |       |       |        |        |                                                        |
|---------------|--------|-------|-------|--------|--------|--------------------------------------------------------|
| PVVCY_1301210 | 5.219  | 5.337 | 6.950 | 7.811  | 18.922 | conserved Plasmodium protein, unknown function         |
| PVVCY_1405930 | 3.199  | 2.208 | 5.044 | 5.955  | 18.922 | double C2-like domain-containing protein, putative     |
| PVVCY_1403090 | 8.309  | 7.107 | 7.323 | 8.436  | 18.924 | bromodomain protein 2, putative                        |
| PVVCY_0401550 | 9.395  | 8.905 | 9.125 | 8.989  | 18.926 | formate-nitrite transporter, putative                  |
| PVVCY_0700460 | 4.508  | 3.487 | 3.883 | 5.182  | 18.926 | conserved Plasmodium protein, unknown function         |
| PVVCY_0801820 | 3.969  | 2.632 | 6.041 | 7.067  | 18.927 | regulator of chromosome condensation, putative         |
| PVVCY_1301870 | 5.877  | 4.995 | 4.895 | 5.293  | 18.928 | pyridine nucleotide transhydrogenase, putative         |
| PVVCY_0901410 | 7.607  | 7.095 | 7.499 | 7.444  | 18.929 | palmitoyltransferase DHHC9, putative                   |
| PVVCY_0701330 | 5.024  | 4.589 | 4.361 | 4.028  | 18.929 | asparagine-rich antigen, putative                      |
| PVVCY_0903650 | 3.228  | 1.664 | 5.049 | 5.954  | 18.931 | conserved Plasmodium protein, unknown function         |
| PVVCY_1301170 | 4.279  | 3.054 | 3.563 | 5.183  | 18.931 | conserved Plasmodium protein, unknown function         |
| PVVCY_0904730 | 2.818  | 2.109 | 2.305 | 3.086  | 18.938 | fam-a protein                                          |
| PVVCY_0900720 | 7.975  | 6.911 | 7.282 | 8.585  | 18.939 | transcription factor with AP2 domain(s), putative      |
| PVVCY_1405710 | 8.208  | 7.000 | 7.448 | 8.971  | 18.940 | conserved Plasmodium protein, unknown function         |
| PVVCY_0803380 | 8.422  | 6.755 | 7.212 | 9.058  | 18.943 | conserved Plasmodium protein, unknown function         |
| PVVCY_0600060 | 5.561  | 3.890 | 4.306 | 6.084  | 18.943 | fam-a protein                                          |
| PVVCY_0602070 | 4.805  | 4.104 | 4.313 | 5.117  | 18.944 | conserved Plasmodium protein, unknown function         |
| PVVCY_0301705 | 10.743 | 9.398 | 9.695 | 11.071 | 18.948 | Plasmodium exported protein, unknown function          |
| PVVCY_1305220 | 5.795  | 5.444 | 5.524 | 5.887  | 18.951 | conserved Plasmodium protein, unknown function         |
| PVVCY_1302930 | 9.516  | 7.696 | 8.178 | 10.184 | 18.952 | fam-a protein                                          |
| PVVCY_1400500 | 0.887  | 0.493 | 1.227 | 1.400  | 18.953 | NLI interacting factor-like phosphatase, putative      |
| PVVCY_0502270 | 3.731  | 4.065 | 5.609 | 6.553  | 18.955 | conserved Plasmodium protein, unknown function         |
| PVVCY_1400170 | 7.871  | 6.704 | 7.316 | 9.111  | 18.955 | lysophospholipase, putative                            |
| PVVCY_1102210 | 1.696  | 1.077 | 1.303 | 2.090  | 18.956 | conserved Plasmodium protein, unknown function         |
| PVVCY_1304490 | 5.731  | 5.016 | 4.961 | 5.348  | 18.956 | conserved Plasmodium protein, unknown function         |
| PVVCY_0502060 | 10.160 | 9.486 | 9.448 | 9.833  | 18.958 | ADP_ATP transporter on adenylate translocase, putative |
| PVVCY_1402050 | 3.958  | 2.690 | 5.778 | 6.709  | 18.958 | conserved Plasmodium protein, unknown function         |

|               |       |       |       |       |        |                                                                     |
|---------------|-------|-------|-------|-------|--------|---------------------------------------------------------------------|
| PVVCY_0301360 | 4.984 | 4.299 | 4.215 | 4.536 | 18.962 | DEAD_DEAH helicase, putative                                        |
| PVVCY_0801640 | 7.799 | 6.819 | 9.013 | 9.640 | 18.963 | glideosome-associated protein 50, putative                          |
| PVVCY_1003550 | 4.171 | 3.496 | 4.348 | 4.446 | 18.963 | actin II, putative                                                  |
| PVVCY_0502160 | 2.840 | 1.959 | 2.117 | 2.976 | 18.964 | conserved Plasmodium protein, unknown function                      |
| PVVCY_1305530 | 5.202 | 4.443 | 4.339 | 4.677 | 18.966 | CPW-WPC family protein                                              |
| PVVCY_0902130 | 8.225 | 8.124 | 8.556 | 8.725 | 18.966 | RING zinc finger protein, putative                                  |
| PVVCY_1305910 | 4.894 | 4.163 | 4.144 | 4.609 | 18.967 | transcription factor with AP2 domain(s), putative                   |
| PVVCY_0101190 | 4.161 | 2.844 | 5.802 | 6.654 | 18.969 | leucine-rich repeat protein                                         |
| PVVCY_0400320 | 0.610 | 0.302 | 0.741 | 1.693 | 18.974 | inner membrane complex protein 1a, putative                         |
| PVVCY_0701950 | 2.281 | 1.593 | 1.740 | 2.460 | 18.975 | conserved Plasmodium protein, unknown function                      |
| PVVCY_0904490 | 1.879 | 1.350 | 1.492 | 2.095 | 18.976 | kinesin-like protein, putative                                      |
| PVVCY_0900830 | 5.121 | 4.320 | 4.325 | 4.888 | 18.980 | conserved Plasmodium protein, unknown function                      |
| PVVCY_1103830 | 8.566 | 7.993 | 8.374 | 8.287 | 18.980 | protein transport protein Sec24A, putative                          |
| PVVCY_1003700 | 6.109 | 5.699 | 5.809 | 6.280 | 18.984 | ribosome maturation protein SBDS, putative                          |
| PVVCY_1306870 | 2.343 | 0.688 | 1.183 | 3.176 | 18.984 | acyl-CoA synthetase, putative                                       |
| PVVCY_1404020 | 7.763 | 7.263 | 7.243 | 7.557 | 18.985 | nucleus export protein BRR6, putative                               |
| PVVCY_1204400 | 2.282 | 1.928 | 2.326 | 3.250 | 18.985 | F-actin-capping protein subunit alpha, putative                     |
| PVVCY_1306360 | 9.332 | 8.811 | 8.705 | 8.891 | 18.986 | ethanolamine-phosphate cytidyltransferase, putative                 |
| PVVCY_0400310 | 5.918 | 5.088 | 5.139 | 5.812 | 18.991 | phosphatidylethanolamine-binding protein, putative                  |
| PVVCY_0600310 | 3.191 | 2.570 | 2.911 | 3.931 | 18.992 | conserved Plasmodium protein, unknown function                      |
| PVVCY_1304900 | 5.154 | 4.146 | 4.099 | 4.732 | 18.992 | CPW-WPC family protein                                              |
| PVVCY_0801600 | 7.234 | 6.686 | 6.573 | 6.768 | 18.993 | pre-mRNA-splicing factor ATP-dependent RNA helicase PRP22, putative |
| PVVCY_1303620 | 4.891 | 4.262 | 4.125 | 4.339 | 18.998 | phosphodiesterase delta, putative                                   |
| PVVCY_0902960 | 3.282 | 2.335 | 2.571 | 3.650 | 18.999 | armadillo repeat protein PF16, putative                             |
| PVVCY_1002030 | 6.564 | 6.018 | 5.899 | 6.086 | 19.000 | CPW-WPC family protein                                              |
| PVVCY_0802230 | 9.258 | 8.868 | 8.926 | 8.767 | 19.000 | RNA-binding protein, putative                                       |
| PVVCY_0100070 | 6.803 | 4.728 | 5.277 | 7.705 | 19.001 | fam-b protein                                                       |



|               |        |        |        |        |        |                                                     |
|---------------|--------|--------|--------|--------|--------|-----------------------------------------------------|
| PVVCY_1201370 | 4.402  | 3.682  | 3.516  | 3.747  | 19.002 | conserved Plasmodium protein, unknown function      |
| PVVCY_1402140 | 0.605  | 0.446  | 1.452  | 1.894  | 19.006 | phosphodiesterase gamma, putative                   |
| PVVCY_1100230 | 7.942  | 6.288  | 9.749  | 10.739 | 19.010 | rhoptry-associated protein 2/3, putative            |
| PVVCY_0902840 | 1.742  | 1.214  | 1.510  | 2.407  | 19.012 | phosphatidylinositol-4-phosphate 5-kinase, putative |
| PVVCY_1003710 | 4.309  | 3.089  | 6.196  | 7.216  | 19.014 | conserved Plasmodium protein, unknown function      |
| PVVCY_0300660 | 6.823  | 6.253  | 5.828  | 5.509  | 19.015 | acyl carrier protein, putative                      |
| PVVCY_1204060 | 10.651 | 10.268 | 10.081 | 10.038 | 19.016 | acyl-CoA synthetase, putative                       |
| PVVCY_1002530 | 4.415  | 3.819  | 4.050  | 4.887  | 19.018 | ankyrin, putative                                   |
| PVVCY_0200690 | 3.865  | 3.490  | 5.598  | 6.514  | 19.022 | conserved Plasmodium protein, unknown function      |
| PVVCY_1100200 | 7.909  | 6.756  | 7.197  | 8.816  | 19.022 | Plasmodium exported protein, unknown function       |
| PVVCY_1306040 | 5.214  | 2.914  | 6.822  | 7.750  | 19.023 | zinc finger protein, putative                       |
| PVVCY_0903660 | 4.560  | 3.217  | 6.331  | 7.307  | 19.024 | conserved Plasmodium protein, unknown function      |
| PVVCY_1404760 | 7.170  | 6.653  | 6.667  | 7.076  | 19.024 | pre-mRNA-splicing regulator, putative               |
| PVVCY_1305730 | 10.359 | 9.590  | 9.426  | 9.715  | 19.026 | sodium-dependent phosphate transporter, putative    |
| PVVCY_1002390 | 3.169  | 2.014  | 2.194  | 3.370  | 19.028 | conserved Plasmodium protein, unknown function      |
| PVVCY_1305920 | 6.489  | 5.781  | 7.952  | 8.744  | 19.028 | conserved Plasmodium protein, unknown function      |
| PVVCY_0602420 | 10.838 | 8.919  | 9.257  | 11.291 | 19.032 | fam-a protein                                       |
| PVVCY_0600890 | 4.859  | 4.286  | 4.206  | 4.497  | 19.035 | zinc finger protein, putative                       |
| PVVCY_1305980 | 8.380  | 7.502  | 7.659  | 8.599  | 19.035 | kelch protein K13, putative                         |
| PVVCY_1201760 | 2.597  | 2.415  | 4.478  | 5.470  | 19.036 | conserved Plasmodium protein, unknown function      |
| PVVCY_0900880 | 4.252  | 3.077  | 6.093  | 7.111  | 19.037 | conserved Plasmodium protein, unknown function      |
| PVVCY_1404390 | 3.310  | 3.281  | 4.928  | 5.777  | 19.039 | conserved Plasmodium protein, unknown function      |
| PVVCY_0802800 | 6.767  | 6.112  | 6.111  | 6.608  | 19.040 | G2 protein, putative                                |
| PVVCY_1103990 | 2.866  | 1.835  | 4.574  | 5.519  | 19.041 | conserved Plasmodium protein, unknown function      |
| PVVCY_1103800 | 5.699  | 5.022  | 6.135  | 6.397  | 19.043 | E3 SUMO-protein ligase PIAS, putative               |
| PVVCY_0903050 | 1.814  | 0.946  | 2.903  | 3.517  | 19.043 | oxysterol-binding protein, putative                 |
| PVVCY_0400430 | 6.738  | 5.844  | 6.044  | 7.086  | 19.046 | conserved Plasmodium protein, unknown function      |

|               |       |       |       |        |        |                                                                                                 |
|---------------|-------|-------|-------|--------|--------|-------------------------------------------------------------------------------------------------|
| PVVCY_1101970 | 4.293 | 3.989 | 5.659 | 6.392  | 19.048 | conserved Plasmodium protein, unknown function                                                  |
| PVVCY_0802440 | 7.727 | 7.057 | 6.784 | 6.823  | 19.056 | protein kinase, putative                                                                        |
| PVVCY_0802860 | 1.647 | 1.021 | 1.293 | 2.265  | 19.056 | leucine-rich repeat protein                                                                     |
| PVVCY_0401880 | 3.807 | 3.013 | 4.296 | 4.598  | 19.057 | alpha tubulin 1, putative                                                                       |
| PVVCY_1403860 | 6.564 | 5.885 | 5.820 | 6.235  | 19.057 | inner membrane complex protein 1h, putative                                                     |
| PVVCY_0701800 | 4.283 | 3.994 | 4.288 | 5.037  | 19.058 | conserved protein, unknown function                                                             |
| PVVCY_0501420 | 0.759 | 0.804 | 1.244 | 1.994  | 19.059 | conserved Plasmodium protein, unknown function                                                  |
| PVVCY_1306600 | 8.255 | 7.611 | 7.815 | 7.619  | 19.061 | small nuclear ribonucleoprotein E, putative                                                     |
| PVVCY_0100190 | 8.949 | 8.228 | 8.485 | 9.511  | 19.061 | PIR protein CIR protein                                                                         |
| PVVCY_1003970 | 6.716 | 5.695 | 5.583 | 6.189  | 19.064 | transcription factor with AP2 domain(s), putative                                               |
| PVVCY_1202850 | 2.576 | 1.421 | 1.671 | 3.031  | 19.064 | conserved Plasmodium protein, unknown function                                                  |
| PVVCY_0101510 | 5.198 | 3.748 | 4.396 | 6.701  | 19.065 | CIR protein PIR protein, fragment                                                               |
| PVVCY_1202860 | 5.884 | 4.707 | 5.062 | 6.631  | 19.067 | adenylyl cyclase beta, putative                                                                 |
| PVVCY_1306940 | 1.844 | 0.602 | 1.130 | 3.073  | 19.072 | fam-a protein                                                                                   |
| PVVCY_0401830 | 6.389 | 5.623 | 5.570 | 6.087  | 19.073 | PH domain-containing protein, putative                                                          |
| PVVCY_1400910 | 7.304 | 6.709 | 7.033 | 6.928  | 19.074 | mRNA-decapping enzyme 2, putative                                                               |
| PVVCY_0701210 | 8.985 | 8.668 | 8.841 | 9.407  | 19.074 | zinc finger protein, putative                                                                   |
| PVVCY_1303530 | 1.914 | 1.146 | 1.200 | 1.912  | 19.075 | biotin carboxylase subunit of acetyl CoA carboxylase, putative                                  |
| PVVCY_0803150 | 1.371 | 1.042 | 1.233 | 1.842  | 19.077 | conserved Plasmodium protein, unknown function                                                  |
| PVVCY_1100850 | 6.039 | 4.744 | 7.799 | 8.829  | 19.083 | 6-cysteine protein                                                                              |
| PVVCY_0701860 | 9.532 | 9.131 | 9.693 | 9.807  | 19.084 | small GTP-binding protein sar1, putative                                                        |
| PVVCY_1304150 | 8.591 | 7.303 | 9.684 | 10.360 | 19.086 | glideosome associated protein with multiple membrane spans 1, putative                          |
| PVVCY_1306450 | 3.159 | 2.681 | 5.235 | 6.381  | 19.089 | conserved Plasmodium protein, unknown function                                                  |
| PVVCY_0802650 | 2.607 | 1.839 | 2.050 | 3.065  | 19.089 | conserved Plasmodium protein, unknown function                                                  |
| PVVCY_1402470 | 6.107 | 5.483 | 5.339 | 5.590  | 19.091 | conserved Plasmodium protein, unknown function                                                  |
| PVVCY_1404590 | 4.294 | 3.409 | 5.812 | 6.691  | 19.091 | multidrug resistance-associated protein 2, putative ABC transporter C family member 2, putative |
| PVVCY_0803420 | 8.394 | 7.017 | 7.247 | 8.807  | 19.094 | fam-b protein                                                                                   |

|               |       |       |       |       |        |                                                                   |
|---------------|-------|-------|-------|-------|--------|-------------------------------------------------------------------|
| PVVCY_0701970 | 2.464 | 1.980 | 1.989 | 2.409 | 19.096 | conserved Plasmodium protein, unknown function                    |
| PVVCY_1305610 | 3.714 | 3.279 | 5.543 | 6.558 | 19.096 | conserved Plasmodium protein, unknown function                    |
| PVVCY_0900290 | 5.332 | 4.586 | 4.500 | 4.963 | 19.097 | CPW-WPC family protein                                            |
| PVVCY_0903890 | 2.349 | 1.485 | 1.451 | 2.106 | 19.097 | myosin heavy chain subunit, putative                              |
| PVVCY_1104890 | 2.369 | 0.701 | 0.836 | 2.472 | 19.099 | fam-a protein                                                     |
| PVVCY_1103130 | 8.636 | 8.425 | 8.558 | 8.980 | 19.100 | ER lumen protein retaining receptor, putative                     |
| PVVCY_1402780 | 5.767 | 4.132 | 7.377 | 8.370 | 19.102 | conserved Plasmodium protein, unknown function                    |
| PVVCY_1403630 | 7.850 | 7.236 | 7.132 | 7.453 | 19.103 | conserved Plasmodium protein, unknown function                    |
| PVVCY_0902380 | 4.032 | 2.363 | 5.742 | 6.794 | 19.103 | kelch domain-containing protein, putative                         |
| PVVCY_0900140 | 3.279 | 1.404 | 1.721 | 3.901 | 19.111 | acyl-CoA synthetase, putative                                     |
| PVVCY_0801440 | 4.530 | 3.391 | 5.986 | 6.867 | 19.111 | major facilitator superfamily domain-containing protein, putative |
| PVVCY_0903540 | 7.546 | 7.105 | 7.391 | 7.344 | 19.113 | DnaJ protein, putative                                            |
| PVVCY_0201250 | 4.319 | 2.578 | 5.847 | 6.828 | 19.120 | alpha_beta hydrolase, putative                                    |
| PVVCY_0903470 | 4.593 | 3.037 | 6.248 | 7.284 | 19.121 | conserved Plasmodium protein, unknown function                    |
| PVVCY_1000350 | 4.218 | 2.836 | 6.082 | 7.218 | 19.123 | serine_threonine protein kinase, putative                         |
| PVVCY_0800310 | 7.603 | 7.102 | 7.150 | 6.947 | 19.124 | protein transport protein Sec24B, putative                        |
| PVVCY_0800200 | 4.453 | 1.005 | 5.442 | 6.290 | 19.126 | conserved Plasmodium protein, unknown function                    |
| PVVCY_0501920 | 9.301 | 8.797 | 8.824 | 8.609 | 19.127 | methionine--tRNA ligase, putative                                 |
| PVVCY_1301730 | 6.150 | 4.105 | 7.722 | 8.766 | 19.129 | rhoptry neck protein 2, putative                                  |
| PVVCY_0701290 | 5.053 | 2.963 | 6.732 | 7.840 | 19.130 | rhoptry neck protein 5, putative                                  |
| PVVCY_1305420 | 3.413 | 2.263 | 4.840 | 5.733 | 19.139 | conserved Plasmodium protein, unknown function                    |
| PVVCY_1204650 | 1.658 | 0.892 | 3.006 | 3.821 | 19.143 | conserved Plasmodium protein, unknown function                    |
| PVVCY_1202150 | 2.321 | 2.134 | 4.027 | 4.983 | 19.145 | conserved Plasmodium protein, unknown function                    |
| PVVCY_0802190 | 5.984 | 5.270 | 7.481 | 8.374 | 19.145 | cyclin-dependent kinases regulatory subunit, putative             |
| PVVCY_1103030 | 3.566 | 2.106 | 5.352 | 6.483 | 19.149 | conserved Plasmodium protein, unknown function                    |
| PVVCY_0502430 | 6.278 | 4.639 | 7.961 | 9.056 | 19.151 | asparagine rich protein, putative                                 |
| PVVCY_0701380 | 6.226 | 5.607 | 5.479 | 5.771 | 19.152 | meiotic recombination protein DMC1, putative                      |

|               |        |       |       |        |        |                                                               |
|---------------|--------|-------|-------|--------|--------|---------------------------------------------------------------|
| PVVCY_0502600 | 11.928 | 9.597 | 9.825 | 12.246 | 19.154 | erythrocyte membrane associated protein 2, putative           |
| PVVCY_0904180 | 1.955  | 1.174 | 1.176 | 1.850  | 19.155 | conserved Plasmodium protein, unknown function                |
| PVVCY_0601950 | 3.742  | 2.820 | 3.000 | 4.130  | 19.157 | secreted ookinete protein, putative                           |
| PVVCY_0901020 | 2.370  | 1.360 | 1.308 | 2.082  | 19.158 | endonuclease_exonuclease_phosphatase family protein, putative |
| PVVCY_0500140 | 2.260  | 0.912 | 0.927 | 2.121  | 19.159 | Plasmodium exported protein, unknown function                 |
| PVVCY_1306640 | 3.970  | 2.100 | 5.456 | 6.478  | 19.160 | conserved Plasmodium protein, unknown function                |
| PVVCY_0500130 | 9.536  | 8.653 | 8.844 | 9.968  | 19.163 | fam-c protein                                                 |
| PVVCY_1204080 | 5.474  | 4.714 | 5.118 | 6.536  | 19.163 | conserved Plasmodium protein, unknown function                |
| PVVCY_0903300 | 3.087  | 2.161 | 4.845 | 5.921  | 19.164 | conserved Plasmodium protein, unknown function                |
| PVVCY_0904500 | 1.807  | 1.139 | 1.995 | 2.172  | 19.165 | conserved Plasmodium protein, unknown function                |
| PVVCY_0800180 | 5.276  | 3.728 | 6.684 | 7.635  | 19.165 | alpha_beta hydrolase, putative                                |
| PVVCY_1400370 | 6.022  | 5.294 | 6.721 | 7.189  | 19.167 | sodium_hydrogen exchanger, Na+, H+ antiporter, putative       |
| PVVCY_0901270 | 5.057  | 4.382 | 6.201 | 6.911  | 19.167 | rhomboid protease ROM1, putative                              |
| PVVCY_0700700 | 6.927  | 6.274 | 6.175 | 6.562  | 19.168 | inner membrane complex protein 1i, putative                   |
| PVVCY_0904060 | 3.422  | 2.852 | 4.694 | 5.466  | 19.170 | conserved Plasmodium protein, unknown function                |
| PVVCY_0701260 | 6.855  | 6.141 | 6.247 | 7.077  | 19.173 | conserved protein, unknown function                           |
| PVVCY_1102510 | 9.467  | 8.081 | 8.210 | 9.680  | 19.173 | sphingomyelin synthase 1, putative                            |
| PVVCY_1102760 | 8.014  | 7.641 | 7.352 | 7.135  | 19.176 | transportin, putative                                         |
| PVVCY_1202770 | 5.916  | 5.039 | 5.217 | 6.333  | 19.178 | AAA family ATPase, putative                                   |
| PVVCY_1404690 | 6.285  | 5.590 | 5.468 | 5.855  | 19.178 | thioredoxin-like associated protein 1, putative               |
| PVVCY_1401040 | 4.613  | 2.879 | 6.379 | 7.568  | 19.180 | conserved Plasmodium protein, unknown function                |
| PVVCY_1004570 | 8.202  | 7.285 | 7.595 | 9.002  | 19.180 | fam-a protein                                                 |
| PVVCY_1004620 | 7.610  | 5.656 | 6.024 | 8.470  | 19.181 | fam-a protein                                                 |
| PVVCY_0903780 | 7.754  | 6.845 | 6.711 | 7.272  | 19.182 | transcription factor with AP2 domain(s), putative             |
| PVVCY_1101420 | 5.842  | 5.235 | 5.315 | 6.013  | 19.183 | 6-cysteine protein secreted ookinete protein, putative        |
| PVVCY_1204140 | 4.192  | 3.679 | 4.074 | 5.287  | 19.185 | NIMA related kinase 2, putative                               |
| PVVCY_1203810 | 5.474  | 3.704 | 7.159 | 8.319  | 19.189 | inner membrane complex protein, putative                      |

|               |        |        |        |        |        |                                                    |
|---------------|--------|--------|--------|--------|--------|----------------------------------------------------|
| PVVCY_1101750 | 7.126  | 6.472  | 6.588  | 7.401  | 19.190 | AP-2 complex subunit alpha, putative               |
| PVVCY_0801990 | 5.633  | 5.112  | 4.925  | 5.041  | 19.190 | tetratricopeptide repeat protein, putative         |
| PVVCY_1304630 | 3.203  | 2.149  | 2.142  | 3.085  | 19.191 | conserved Plasmodium protein, unknown function     |
| PVVCY_1403480 | 3.521  | 2.399  | 2.511  | 3.744  | 19.191 | meiotic recombination protein SPO11, putative      |
| PVVCY_0802600 | 5.362  | 4.579  | 7.122  | 8.206  | 19.191 | RNA-binding protein, putative                      |
| PVVCY_0300700 | 2.756  | 1.870  | 1.682  | 2.129  | 19.192 | 6-cysteine protein                                 |
| PVVCY_1004420 | 5.159  | 4.135  | 4.352  | 5.702  | 19.195 | conserved Plasmodium protein, unknown function     |
| PVVCY_1101350 | 4.482  | 3.301  | 3.356  | 4.539  | 19.195 | conserved Plasmodium protein, unknown function     |
| PVVCY_1201960 | 6.664  | 5.544  | 5.524  | 6.514  | 19.197 | ABC transporter I family member 1, putative        |
| PVVCY_1104300 | 3.400  | 1.683  | 5.097  | 6.275  | 19.201 | DIP13 homolog, putative                            |
| PVVCY_1406710 | 5.536  | 3.511  | 7.081  | 8.214  | 19.202 | rhoptry neck protein 3, putative                   |
| PVVCY_0401890 | 4.212  | 2.733  | 6.056  | 7.293  | 19.206 | conserved Plasmodium protein, unknown function     |
| PVVCY_0802700 | 7.511  | 6.721  | 6.957  | 8.150  | 19.207 | conserved Plasmodium protein, unknown function     |
| PVVCY_1203550 | 7.601  | 7.213  | 7.574  | 7.610  | 19.209 | EELM2 domain-containing protein, putative          |
| PVVCY_0901910 | 7.048  | 6.422  | 6.376  | 6.873  | 19.214 | conserved Plasmodium protein, unknown function     |
| PVVCY_1305680 | 6.166  | 5.672  | 5.595  | 5.911  | 19.214 | conserved Plasmodium protein, unknown function     |
| PVVCY_1104780 | 3.394  | 2.124  | 2.439  | 4.251  | 19.217 | lysophospholipase, putative                        |
| PVVCY_0802170 | 3.291  | 2.782  | 2.924  | 3.683  | 19.221 | perforin-like protein 3                            |
| PVVCY_0101360 | 3.407  | 2.086  | 4.815  | 5.801  | 19.221 | conserved Plasmodium protein, unknown function     |
| PVVCY_1000140 | 8.605  | 7.210  | 7.364  | 8.998  | 19.223 | conserved rodent malaria protein, unknown function |
| PVVCY_1201120 | 5.668  | 5.386  | 6.394  | 6.848  | 19.224 | E3 ubiquitin-protein ligase, putative              |
| PVVCY_1001930 | 4.778  | 3.049  | 6.284  | 7.386  | 19.225 | plasmepsin IX, putative                            |
| PVVCY_1402160 | 2.024  | 1.253  | 1.298  | 2.125  | 19.225 | conserved Plasmodium protein, unknown function     |
| PVVCY_1100910 | 4.980  | 5.108  | 5.471  | 6.061  | 19.227 | conserved Plasmodium protein, unknown function     |
| PVVCY_0500050 | 4.553  | 3.182  | 3.386  | 5.106  | 19.228 | CIR protein PIR protein                            |
| PVVCY_0502130 | 12.561 | 11.827 | 12.728 | 12.929 | 19.229 | antigen UB05, putative                             |
| PVVCY_0702060 | 5.533  | 4.846  | 4.763  | 5.266  | 19.234 | conserved Plasmodium protein, unknown function     |

|               |       |       |       |        |        |                                                                                             |
|---------------|-------|-------|-------|--------|--------|---------------------------------------------------------------------------------------------|
| PVVCY_1003720 | 8.373 | 7.730 | 7.702 | 8.275  | 19.236 | conserved Plasmodium protein, unknown function                                              |
| PVVCY_0501190 | 9.430 | 8.822 | 9.283 | 10.784 | 19.236 | merozoite capping protein 1, putative peroxiredoxin, putative                               |
| PVVCY_0802040 | 2.695 | 2.238 | 2.943 | 3.152  | 19.238 | dynein intermediate chain, putative                                                         |
| PVVCY_0100970 | 6.335 | 5.355 | 7.406 | 8.166  | 19.238 | palmitoyltransferase DHHC2, putative                                                        |
| PVVCY_0801090 | 5.168 | 3.312 | 6.857 | 8.102  | 19.240 | conserved Plasmodium protein, unknown function                                              |
| PVVCY_1003750 | 7.956 | 6.060 | 9.595 | 10.818 | 19.240 | rhoptry-associated protein 1, putative                                                      |
| PVVCY_0904210 | 3.613 | 2.586 | 5.034 | 6.006  | 19.243 | conserved Plasmodium protein, unknown function                                              |
| PVVCY_1301770 | 7.311 | 6.866 | 7.125 | 7.085  | 19.246 | conserved Plasmodium protein, unknown function                                              |
| PVVCY_1203940 | 7.783 | 7.329 | 7.204 | 7.402  | 19.246 | conserved Plasmodium protein, unknown function                                              |
| PVVCY_0901940 | 2.703 | 2.530 | 2.780 | 3.448  | 19.247 | WD repeat-containing protein, putative                                                      |
| PVVCY_1404920 | 6.338 | 6.002 | 6.127 | 6.708  | 19.250 | conserved protein, unknown function                                                         |
| PVVCY_0900420 | 2.177 | 0.821 | 3.556 | 4.562  | 19.252 | calcium_calmodulin-dependent protein kinase, putative                                       |
| PVVCY_1403520 | 3.635 | 3.333 | 3.760 | 4.916  | 19.255 | conserved Plasmodium protein, unknown function                                              |
| PVVCY_0300510 | 6.276 | 5.797 | 5.640 | 5.805  | 19.255 | conserved Plasmodium protein, unknown function                                              |
| PVVCY_1102830 | 3.126 | 2.174 | 2.137 | 3.019  | 19.256 | conserved Plasmodium protein, unknown function                                              |
| PVVCY_1001440 | 5.703 | 5.152 | 5.071 | 5.461  | 19.258 | conserved Plasmodium protein, unknown function                                              |
| PVVCY_1000410 | 3.733 | 2.737 | 5.058 | 5.984  | 19.259 | conserved Plasmodium protein, unknown function                                              |
| PVVCY_0100130 | 7.189 | 6.105 | 6.335 | 7.898  | 19.262 | fam-c protein                                                                               |
| PVVCY_0502560 | 7.287 | 5.659 | 5.970 | 8.248  | 19.263 | lysophospholipase, putative                                                                 |
| PVVCY_1103720 | 2.205 | 1.591 | 3.891 | 4.969  | 19.263 | ADP-ribosylation factor, putative                                                           |
| PVVCY_0901370 | 6.620 | 6.118 | 7.512 | 8.114  | 19.269 | SET domain-containing protein 7, putative histone-lysine N-methyltransferase SET7, putative |
| PVVCY_0904740 | 7.772 | 5.945 | 6.072 | 8.216  | 19.274 | fam-a protein                                                                               |
| PVVCY_0101120 | 4.450 | 3.746 | 3.595 | 4.013  | 19.275 | conserved Plasmodium protein, unknown function                                              |
| PVVCY_0800790 | 7.267 | 5.750 | 5.831 | 7.574  | 19.278 | erythrocyte vesicle protein 1, putative                                                     |
| PVVCY_0802330 | 4.415 | 4.024 | 4.251 | 5.123  | 19.281 | conserved Plasmodium protein, unknown function                                              |
| PVVCY_0904690 | 5.992 | 4.792 | 4.992 | 6.654  | 19.281 | fam-b protein                                                                               |
| PVVCY_1200100 | 7.540 | 5.734 | 9.036 | 10.223 | 19.282 | 6-cysteine protein                                                                          |

|               |        |        |        |        |        |                                                                          |
|---------------|--------|--------|--------|--------|--------|--------------------------------------------------------------------------|
| PVVCY_0502050 | 1.957  | 0.909  | 0.974  | 2.202  | 19.283 | conserved Plasmodium protein, unknown function                           |
| PVVCY_1001370 | 6.683  | 5.759  | 5.871  | 7.068  | 19.285 | cytosolic Fe-S cluster assembly factor NBP35, putative                   |
| PVVCY_1402330 | 4.758  | 4.073  | 3.999  | 4.566  | 19.286 | conserved Plasmodium protein, unknown function                           |
| PVVCY_1401910 | 7.576  | 6.949  | 6.864  | 7.350  | 19.287 | conserved protein, unknown function                                      |
| PVVCY_0904530 | 2.481  | 0.000  | 1.853  | 1.917  | 19.287 | dynein light chain, putative                                             |
| PVVCY_1000310 | 4.352  | 3.186  | 5.441  | 6.286  | 19.290 | conserved Plasmodium protein, unknown function                           |
| PVVCY_0502440 | 7.994  | 6.978  | 9.020  | 9.803  | 19.290 | glideosome associated protein with multiple membrane spans 2, putative   |
| PVVCY_1302950 | 5.542  | 3.474  | 6.822  | 7.943  | 19.292 | conserved Plasmodium protein, unknown function                           |
| PVVCY_0301440 | 2.013  | 1.156  | 3.360  | 4.306  | 19.293 | conserved Plasmodium protein, unknown function                           |
| PVVCY_1101620 | 8.415  | 7.417  | 9.550  | 10.398 | 19.294 | glideosome-associated protein 40, putative                               |
| PVVCY_1404930 | 3.650  | 2.778  | 4.968  | 5.901  | 19.296 | CG2-related protein, putative                                            |
| PVVCY_1104810 | 11.398 | 10.536 | 10.295 | 10.723 | 19.301 | early transcribed membrane protein                                       |
| PVVCY_1401390 | 2.571  | 2.406  | 4.377  | 5.475  | 19.303 | conserved Plasmodium protein, unknown function                           |
| PVVCY_1302200 | 10.744 | 10.344 | 10.403 | 10.275 | 19.303 | V-type H(+)-translocating pyrophosphatase, putative                      |
| PVVCY_1302580 | 5.653  | 3.229  | 6.797  | 7.920  | 19.304 | inner membrane complex sub-compartment protein 3, putative               |
| PVVCY_1004550 | 7.970  | 7.555  | 7.703  | 8.457  | 19.304 | choline kinase, putative                                                 |
| PVVCY_0602000 | 7.897  | 5.569  | 9.391  | 10.709 | 19.307 | rhoptry-associated leucine zipper-like protein 1, putative               |
| PVVCY_1104940 | 2.474  | 0.994  | 1.177  | 3.172  | 19.309 | fam-b protein                                                            |
| PVVCY_1200310 | 6.068  | 5.715  | 5.469  | 5.338  | 19.311 | WD repeat-containing protein, putative                                   |
| PVVCY_0701480 | 7.099  | 6.499  | 6.577  | 7.398  | 19.311 | vacuolar protein sorting-associated protein 9, putative                  |
| PVVCY_0200430 | 6.419  | 5.678  | 5.492  | 5.914  | 19.311 | LCCL domain-containing protein                                           |
| PVVCY_0600600 | 4.724  | 4.034  | 6.342  | 7.435  | 19.313 | conserved Plasmodium protein, unknown function                           |
| PVVCY_0903460 | 3.941  | 3.124  | 3.069  | 3.848  | 19.313 | conserved Plasmodium protein, unknown function                           |
| PVVCY_1402250 | 1.889  | 1.651  | 1.979  | 2.926  | 19.314 | calmodulin, putative                                                     |
| PVVCY_0701100 | 10.177 | 9.462  | 9.425  | 10.135 | 19.317 | conserved Plasmodium protein, unknown function                           |
| PVVCY_0500160 | 2.479  | 1.187  | 0.939  | 1.845  | 19.318 | up-regulated in infective sporozoites early transcribed membrane protein |
| PVVCY_1102310 | 7.919  | 7.313  | 7.499  | 7.364  | 19.318 | nuclear polyadenylated RNA-binding protein NAB2, putative                |

|               |        |        |       |        |        |                                                                      |
|---------------|--------|--------|-------|--------|--------|----------------------------------------------------------------------|
| PVVCY_0500480 | 4.985  | 4.193  | 5.480 | 5.929  | 19.320 | flagellar outer arm dynein-associated protein, putative              |
| PVVCY_0803440 | 7.949  | 6.144  | 6.287 | 8.589  | 19.321 | lysophospholipase, putative                                          |
| PVVCY_0501470 | 4.561  | 2.579  | 5.643 | 6.675  | 19.323 | conserved Plasmodium protein, unknown function                       |
| PVVCY_1403980 | 6.038  | 5.208  | 5.091 | 5.770  | 19.326 | conserved Plasmodium protein, unknown function                       |
| PVVCY_0400800 | 4.767  | 3.501  | 3.613 | 5.351  | 19.328 | conserved Plasmodium protein, unknown function                       |
| PVVCY_1400290 | 6.352  | 5.428  | 5.224 | 5.829  | 19.329 | ATP-dependent RNA helicase DHR1, putative                            |
| PVVCY_1406590 | 6.116  | 5.570  | 5.607 | 6.302  | 19.330 | conserved Plasmodium protein, unknown function                       |
| PVVCY_0701670 | 7.138  | 4.566  | 8.209 | 9.363  | 19.331 | armadillo-domain containing rhoptry protein, putative                |
| PVVCY_1406730 | 6.835  | 5.128  | 5.080 | 6.903  | 19.332 | fam-c protein                                                        |
| PVVCY_1202890 | 6.104  | 5.413  | 5.169 | 5.431  | 19.333 | periodic tryptophan protein 2, putative                              |
| PVVCY_0600660 | 6.259  | 5.530  | 5.354 | 5.837  | 19.333 | blood stage antigen 41-3 precursor, putative                         |
| PVVCY_0904320 | 7.367  | 7.339  | 8.255 | 8.794  | 19.334 | ras-related protein Rab-6, putative                                  |
| PVVCY_1301690 | 6.584  | 5.908  | 5.758 | 6.202  | 19.334 | LCCL domain-containing protein                                       |
| PVVCY_1001120 | 5.620  | 5.275  | 6.670 | 7.370  | 19.335 | P1 nuclease, putative                                                |
| PVVCY_1002130 | 5.331  | 5.063  | 6.029 | 6.502  | 19.335 | major facilitator superfamily domain-containing protein, putative    |
| PVVCY_0501740 | 9.387  | 8.625  | 8.309 | 8.525  | 19.335 | S-adenosylmethionine decarboxylase/ornithine decarboxylase, putative |
| PVVCY_1202260 | 7.935  | 7.240  | 7.237 | 8.022  | 19.337 | conserved Plasmodium protein, unknown function                       |
| PVVCY_1000620 | 8.548  | 6.275  | 9.946 | 11.248 | 19.338 | rhoptry-associated membrane antigen, putative                        |
| PVVCY_1400060 | 1.082  | 0.543  | 0.718 | 1.706  | 19.339 | Plasmodium exported protein, unknown function                        |
| PVVCY_1104920 | 2.772  | 1.453  | 1.281 | 2.415  | 19.339 | fam-a protein                                                        |
| PVVCY_0402040 | 6.257  | 5.087  | 5.337 | 7.207  | 19.339 | Plasmodium exported protein, unknown function                        |
| PVVCY_1401130 | 3.105  | 2.197  | 2.315 | 3.607  | 19.340 | meiosis-specific nuclear structural protein 1, putative              |
| PVVCY_0501540 | 10.641 | 10.102 | 9.983 | 10.348 | 19.346 | 28 kDa ookinete surface protein, putative                            |
| PVVCY_1103250 | 5.273  | 4.421  | 4.189 | 4.713  | 19.349 | metacaspase 1, putative                                              |
| PVVCY_0903350 | 1.511  | 1.055  | 1.146 | 1.873  | 19.349 | conserved Plasmodium protein, unknown function                       |
| PVVCY_1200520 | 5.763  | 4.998  | 4.994 | 5.926  | 19.352 | conserved Plasmodium protein, unknown function                       |
| PVVCY_1405250 | 1.300  | 0.889  | 0.898 | 1.423  | 19.354 | conserved Plasmodium protein, unknown function                       |



|               |        |        |        |        |        |                                                              |
|---------------|--------|--------|--------|--------|--------|--------------------------------------------------------------|
| PVVCY_0501810 | 4.793  | 4.184  | 4.010  | 4.342  | 19.355 | plasmepsin VII, putative                                     |
| PVVCY_1404810 | 3.117  | 2.477  | 2.424  | 3.108  | 19.366 | conserved Plasmodium protein, unknown function               |
| PVVCY_1103600 | 6.984  | 6.656  | 6.400  | 6.234  | 19.367 | zinc finger protein, putative                                |
| PVVCY_1405760 | 7.216  | 6.578  | 6.478  | 7.054  | 19.368 | conserved Plasmodium protein, unknown function               |
| PVVCY_0700090 | 9.904  | 8.750  | 8.586  | 9.669  | 19.370 | sporozoite and liver stage tryptophan-rich protein, putative |
| PVVCY_0802580 | 1.768  | 1.125  | 1.079  | 1.784  | 19.370 | conserved Plasmodium protein, unknown function               |
| PVVCY_0101370 | 7.441  | 5.736  | 5.800  | 8.097  | 19.371 | cytosolic Fe-S cluster assembly factor NAR1, putative        |
| PVVCY_0201700 | 7.540  | 5.809  | 5.877  | 8.225  | 19.373 | fam-a protein                                                |
| PVVCY_0500100 | 6.667  | 4.789  | 4.988  | 7.893  | 19.391 | fam-b protein                                                |
| PVVCY_0900500 | 6.768  | 6.560  | 6.824  | 7.703  | 19.391 | translocon component PTEX88, putative                        |
| PVVCY_0101520 | 7.714  | 5.840  | 5.993  | 8.795  | 19.393 | fam-b protein                                                |
| PVVCY_1400940 | 7.617  | 7.405  | 7.508  | 8.026  | 19.399 | protein phosphatase PPM6, putative                           |
| PVVCY_1100990 | 6.665  | 6.254  | 5.928  | 5.714  | 19.403 | RNA polymerase I, putative                                   |
| PVVCY_1302660 | 4.078  | 3.101  | 2.952  | 3.901  | 19.403 | conserved Plasmodium protein, unknown function               |
| PVVCY_1003600 | 11.160 | 10.739 | 10.677 | 11.092 | 19.405 | p1_s1 nuclease, putative                                     |
| PVVCY_0904030 | 5.524  | 5.042  | 4.875  | 5.129  | 19.408 | inner membrane complex protein 1b, putative                  |
| PVVCY_0500400 | 5.267  | 4.583  | 4.414  | 4.940  | 19.414 | zinc finger protein, putative                                |
| PVVCY_1103170 | 1.809  | 1.253  | 1.293  | 2.151  | 19.424 | conserved Plasmodium protein, unknown function               |
| PVVCY_1000280 | 3.148  | 2.564  | 2.506  | 3.176  | 19.430 | conserved Plasmodium protein, unknown function               |
| PVVCY_0502520 | 8.537  | 7.786  | 7.791  | 8.847  | 19.432 | Plasmodium exported protein, unknown function                |
| PVVCY_1203200 | 6.355  | 5.547  | 5.128  | 5.255  | 19.441 | tRNA pseudouridine synthase, putative                        |
| PVVCY_1203740 | 2.606  | 1.898  | 1.983  | 3.187  | 19.444 | conserved Plasmodium protein, unknown function               |
| PVVCY_1101520 | 1.980  | 1.362  | 1.263  | 1.899  | 19.444 | conserved Plasmodium protein, unknown function               |
| PVVCY_1301150 | 2.390  | 1.807  | 1.845  | 2.770  | 19.448 | conserved Plasmodium protein, unknown function               |
| PVVCY_1301650 | 7.683  | 6.544  | 6.423  | 7.752  | 19.449 | conserved Plasmodium protein, unknown function               |
| PVVCY_0902200 | 8.128  | 6.796  | 6.661  | 8.236  | 19.450 | endoplasmic reticulum oxidoreductin, putative                |
| PVVCY_0601190 | 7.443  | 6.787  | 6.809  | 7.806  | 19.456 | N-acetyltransferase, putative                                |

|               |       |       |       |       |        |                                                             |
|---------------|-------|-------|-------|-------|--------|-------------------------------------------------------------|
| PVVCY_1100090 | 1.265 | 0.378 | 0.589 | 2.393 | 19.460 | fam-b protein                                               |
| PVVCY_1103850 | 5.459 | 4.650 | 4.549 | 5.477 | 19.461 | conserved Plasmodium protein, unknown function              |
| PVVCY_0800590 | 7.574 | 6.730 | 6.816 | 8.264 | 19.465 | conserved Plasmodium protein, unknown function              |
| PVVCY_0801510 | 7.038 | 6.590 | 6.744 | 7.779 | 19.466 | RNA-binding protein musashi, putative                       |
| PVVCY_0901720 | 7.223 | 6.682 | 6.725 | 7.625 | 19.467 | acyl-CoA-binding protein, putative                          |
| PVVCY_1302570 | 1.399 | 1.215 | 1.310 | 1.813 | 19.468 | conserved Plasmodium protein, unknown function              |
| PVVCY_0602060 | 5.116 | 4.715 | 4.582 | 4.847 | 19.469 | conserved Plasmodium protein, unknown function              |
| PVVCY_1303070 | 7.761 | 7.221 | 7.065 | 7.480 | 19.474 | ATP-dependent zinc metalloprotease FTSH, putative           |
| PVVCY_1203930 | 8.283 | 7.595 | 7.349 | 7.758 | 19.475 | transporter, putative                                       |
| PVVCY_1001270 | 7.566 | 6.948 | 6.821 | 7.426 | 19.475 | FHA domain protein, putative                                |
| PVVCY_0400630 | 3.409 | 2.794 | 2.501 | 2.695 | 19.485 | EB1 homolog, putative                                       |
| PVVCY_1102380 | 7.650 | 6.637 | 6.559 | 7.905 | 19.490 | tyrosine kinase-like protein, putative                      |
| PVVCY_0502650 | 2.382 | 1.784 | 1.862 | 2.983 | 19.498 | CIR protein PIR protein                                     |
| PVVCY_1306930 | 2.676 | 1.566 | 1.714 | 3.808 | 19.500 | fam-a protein                                               |
| PVVCY_0701010 | 6.162 | 5.748 | 5.747 | 6.385 | 19.502 | conserved Plasmodium protein, unknown function              |
| PVVCY_1402110 | 4.121 | 3.576 | 3.380 | 3.760 | 19.508 | conserved Plasmodium protein, unknown function              |
| PVVCY_1203350 | 3.681 | 3.001 | 2.985 | 4.068 | 19.510 | apicortin, putative                                         |
| PVVCY_1305100 | 6.588 | 5.707 | 5.290 | 5.647 | 19.515 | U3 small nucleolar RNA-associated protein 4, putative       |
| PVVCY_1002470 | 5.880 | 5.463 | 5.375 | 5.839 | 19.516 | calcium-dependent protein kinase, putative                  |
| PVVCY_0900910 | 9.425 | 8.691 | 8.356 | 8.659 | 19.516 | asparagine-rich antigen, putative                           |
| PVVCY_0401130 | 7.948 | 7.192 | 7.090 | 8.083 | 19.516 | major facilitator superfamily-related transporter, putative |
| PVVCY_0100160 | 8.324 | 7.828 | 7.689 | 8.150 | 19.517 | Plasmodium exported protein, unknown function               |
| PVVCY_1003830 | 7.859 | 6.936 | 6.812 | 8.026 | 19.517 | conserved Plasmodium protein, unknown function              |
| PVVCY_0904660 | 7.733 | 6.793 | 6.685 | 7.980 | 19.520 | lysophospholipase, putative                                 |
| PVVCY_0900230 | 7.841 | 6.605 | 6.461 | 8.063 | 19.520 | fam-a protein                                               |
| PVVCY_0602030 | 6.486 | 6.260 | 6.358 | 6.998 | 19.521 | pre-mRNA-splicing factor CWC15, putative                    |
| PVVCY_0400010 | 7.018 | 5.672 | 5.226 | 6.220 | 19.521 | Plasmodium exported protein, unknown function               |

|               |        |        |        |        |        |                                                    |
|---------------|--------|--------|--------|--------|--------|----------------------------------------------------|
| PVVCY_0201470 | 10.875 | 10.248 | 10.119 | 10.829 | 19.521 | Plasmodium exported protein, unknown function      |
| PVVCY_0300710 | 1.833  | 1.101  | 0.869  | 1.438  | 19.521 | 6-cysteine protein                                 |
| PVVCY_0401350 | 6.266  | 5.629  | 5.596  | 6.583  | 19.523 | conserved Plasmodium protein, unknown function     |
| PVVCY_1200080 | 7.829  | 6.790  | 6.758  | 8.348  | 19.524 | fam-a protein                                      |
| PVVCY_0100170 | 4.389  | 2.972  | 3.011  | 5.524  | 19.526 | lysophospholipase, putative                        |
| PVVCY_1406100 | 7.748  | 7.221  | 7.343  | 8.515  | 19.528 | epsin, putative                                    |
| PVVCY_1406280 | 5.186  | 4.464  | 4.270  | 4.934  | 19.530 | dipeptidyl aminopeptidase 2, putative              |
| PVVCY_0502460 | 7.778  | 7.518  | 7.510  | 7.934  | 19.532 | conserved Plasmodium protein, unknown function     |
| PVVCY_1304070 | 6.382  | 5.783  | 5.565  | 6.008  | 19.536 | conserved Plasmodium protein, unknown function     |
| PVVCY_1201920 | 5.174  | 4.826  | 4.749  | 5.143  | 19.539 | CPW-WPC family protein                             |
| PVVCY_1002300 | 5.726  | 5.131  | 4.911  | 5.346  | 19.541 | ABC transporter G family member 2, putative        |
| PVVCY_0602100 | 3.909  | 2.964  | 2.868  | 4.252  | 19.541 | conserved Plasmodium protein, unknown function     |
| PVVCY_1401670 | 8.197  | 7.714  | 7.599  | 8.129  | 19.544 | choline-phosphate cytidyltransferase, putative     |
| PVVCY_1103010 | 6.572  | 6.024  | 5.810  | 6.184  | 19.549 | secreted ookinete protein, putative                |
| PVVCY_1405610 | 4.012  | 3.056  | 2.886  | 4.108  | 19.551 | conserved Plasmodium protein, unknown function     |
| PVVCY_1303980 | 9.835  | 9.561  | 9.436  | 9.573  | 19.553 | conserved Plasmodium protein, unknown function     |
| PVVCY_1404780 | 3.890  | 3.021  | 2.771  | 3.633  | 19.559 | conserved Plasmodium protein, unknown function     |
| PVVCY_1303150 | 4.974  | 4.356  | 4.150  | 4.685  | 19.561 | plasmepsin VIII, putative                          |
| PVVCY_0602390 | 8.795  | 8.315  | 8.324  | 9.219  | 19.563 | conserved rodent malaria protein, unknown function |
| PVVCY_0100360 | 6.624  | 6.055  | 5.934  | 6.629  | 19.566 | trophozoite exported protein 1, putative           |
| PVVCY_1003480 | 4.217  | 3.366  | 3.248  | 4.463  | 19.568 | conserved Plasmodium protein, unknown function     |
| PVVCY_0700330 | 6.969  | 6.518  | 6.385  | 6.832  | 19.568 | conserved Plasmodium protein, unknown function     |
| PVVCY_0200120 | 2.652  | 1.703  | 1.693  | 3.405  | 19.572 | fam-a protein                                      |
| PVVCY_1405530 | 5.731  | 5.363  | 5.485  | 6.519  | 19.581 | sphingomyelin phosphodiesterase, putative          |
| PVVCY_1400360 | 8.010  | 7.279  | 7.014  | 7.621  | 19.584 | LisH domain-containing protein, putative           |
| PVVCY_0904050 | 6.885  | 6.485  | 6.335  | 6.652  | 19.587 | conserved Plasmodium protein, unknown function     |
| PVVCY_1405140 | 4.769  | 4.256  | 4.116  | 4.681  | 19.590 | CPW-WPC family protein                             |

|               |        |        |        |        |        |                                                  |
|---------------|--------|--------|--------|--------|--------|--------------------------------------------------|
| PVVCY_1402080 | 5.839  | 5.114  | 4.860  | 5.560  | 19.599 | conserved Plasmodium protein, unknown function   |
| PVVCY_1201710 | 2.029  | 1.482  | 1.419  | 2.292  | 19.603 | conserved Plasmodium protein, unknown function   |
| PVVCY_0100210 | 12.912 | 12.050 | 11.756 | 12.559 | 19.604 | Plasmodium exported protein, unknown function    |
| PVVCY_1001480 | 9.990  | 9.699  | 9.489  | 9.447  | 19.606 | inhibitor of cysteine proteases, putative        |
| PVVCY_1004400 | 2.287  | 1.856  | 1.857  | 2.703  | 19.609 | conserved Plasmodium protein, unknown function   |
| PVVCY_1302020 | 1.424  | 1.094  | 1.153  | 1.977  | 19.611 | protein phosphatase PPM3, putative               |
| PVVCY_0100410 | 2.208  | 1.409  | 1.338  | 2.699  | 19.612 | conserved Plasmodium protein, unknown function   |
| PVVCY_0901360 | 5.375  | 4.976  | 4.809  | 5.124  | 19.615 | conserved Plasmodium protein, unknown function   |
| PVVCY_0801290 | 1.675  | 0.992  | 0.803  | 1.587  | 19.615 | conserved Plasmodium protein, unknown function   |
| PVVCY_0902570 | 2.072  | 1.094  | 0.914  | 2.322  | 19.619 | conserved Plasmodium protein, unknown function   |
| PVVCY_1302670 | 4.620  | 3.883  | 3.662  | 4.522  | 19.620 | meiotic nuclear division protein 1, putative     |
| PVVCY_1303190 | 5.736  | 5.097  | 4.835  | 5.322  | 19.621 | conserved Plasmodium protein, unknown function   |
| PVVCY_1406370 | 7.815  | 7.657  | 7.748  | 8.362  | 19.622 | conserved Plasmodium protein, unknown function   |
| PVVCY_0700470 | 6.330  | 5.518  | 5.204  | 5.893  | 19.625 | conserved Plasmodium protein, unknown function   |
| PVVCY_1303340 | 1.822  | 1.106  | 0.935  | 1.924  | 19.628 | conserved Plasmodium protein, unknown function   |
| PVVCY_1403560 | 7.567  | 6.857  | 6.503  | 6.910  | 19.629 | diphthamide biosynthesis protein 3, putative     |
| PVVCY_0501250 | 6.086  | 5.542  | 5.317  | 5.771  | 19.629 | palmitoyltransferase DHHC10, putative            |
| PVVCY_1301460 | 7.389  | 6.502  | 6.146  | 6.928  | 19.631 | transcription factor IIIb subunit, putative      |
| PVVCY_1204450 | 8.108  | 7.517  | 7.246  | 7.661  | 19.631 | conserved Plasmodium protein, unknown function   |
| PVVCY_0601400 | 7.995  | 7.429  | 7.219  | 7.772  | 19.632 | RNA-binding protein, putative                    |
| PVVCY_0400130 | 7.017  | 6.157  | 5.929  | 7.057  | 19.632 | fam-a protein                                    |
| PVVCY_1104480 | 4.835  | 4.331  | 4.217  | 4.941  | 19.633 | conserved Plasmodium protein, unknown function   |
| PVVCY_1401440 | 8.461  | 8.015  | 7.917  | 8.566  | 19.635 | conserved Plasmodium protein, unknown function   |
| PVVCY_0402100 | 7.572  | 6.487  | 6.291  | 8.009  | 19.635 | fam-c protein                                    |
| PVVCY_0200270 | 8.295  | 7.949  | 7.811  | 8.122  | 19.637 | transcription initiation factor TFIIIB, putative |
| PVVCY_1401320 | 5.990  | 6.133  | 6.492  | 7.319  | 19.638 | conserved Plasmodium protein, unknown function   |
| PVVCY_0800400 | 7.865  | 7.324  | 7.261  | 8.237  | 19.640 | conserved Plasmodium protein, unknown function   |

|               |       |       |       |       |        |                                                            |
|---------------|-------|-------|-------|-------|--------|------------------------------------------------------------|
| PVVCY_0901150 | 2.481 | 1.607 | 1.351 | 2.444 | 19.642 | conserved Plasmodium protein, unknown function             |
| PVVCY_1100880 | 7.198 | 6.747 | 6.743 | 7.711 | 19.642 | triose phosphate transporter, putative                     |
| PVVCY_1004540 | 2.895 | 2.230 | 2.077 | 3.055 | 19.647 | conserved Plasmodium protein, unknown function             |
| PVVCY_0802840 | 5.468 | 4.902 | 4.668 | 5.168 | 19.649 | procollagen lysine 5-dioxygenase, putative                 |
| PVVCY_1103920 | 1.010 | 0.979 | 1.287 | 2.353 | 19.656 | 14-3-3 protein, putative                                   |
| PVVCY_0800070 | 6.207 | 4.922 | 4.770 | 7.161 | 19.657 | lysophospholipase, putative                                |
| PVVCY_1002740 | 6.282 | 5.802 | 5.827 | 6.983 | 19.657 | surface protein P113, putative                             |
| PVVCY_1303720 | 5.125 | 4.714 | 4.503 | 4.739 | 19.658 | conserved protein, unknown function                        |
| PVVCY_1204440 | 5.468 | 4.928 | 4.653 | 4.975 | 19.659 | conserved Plasmodium protein, unknown function             |
| PVVCY_1202620 | 3.532 | 2.809 | 2.504 | 3.146 | 19.663 | conserved Plasmodium protein, unknown function             |
| PVVCY_1404710 | 5.712 | 5.288 | 5.061 | 5.310 | 19.665 | subpellicular microtubule protein 2, putative              |
| PVVCY_0702100 | 9.142 | 8.356 | 8.257 | 9.722 | 19.666 | protein transport protein GOT1, putative                   |
| PVVCY_1203440 | 2.435 | 1.863 | 1.626 | 2.192 | 19.666 | mRNA-binding protein PUF1, putative                        |
| PVVCY_1003160 | 3.124 | 2.284 | 2.093 | 3.381 | 19.666 | conserved Plasmodium protein, unknown function             |
| PVVCY_0802630 | 6.384 | 5.629 | 5.476 | 6.708 | 19.671 | phosphatidylserine decarboxylase, putative                 |
| PVVCY_0600550 | 2.206 | 1.683 | 1.634 | 2.737 | 19.672 | Tat binding protein 1(TBP-1)-interacting protein, putative |
| PVVCY_0500350 | 2.897 | 2.468 | 2.297 | 2.754 | 19.673 | conserved protein, unknown function                        |
| PVVCY_0400120 | 7.541 | 6.223 | 5.935 | 8.160 | 19.674 | fam-b protein                                              |
| PVVCY_0700340 | 5.445 | 4.722 | 4.430 | 5.137 | 19.676 | conserved Plasmodium protein, unknown function             |
| PVVCY_1303790 | 6.645 | 5.897 | 5.594 | 6.322 | 19.676 | histone deacetylase, putative                              |
| PVVCY_0200100 | 1.503 | 0.640 | 0.491 | 2.092 | 19.677 | conserved rodent malaria protein, unknown function         |
| PVVCY_1301630 | 6.724 | 6.392 | 6.208 | 6.390 | 19.683 | conserved Plasmodium protein, unknown function             |
| PVVCY_1403010 | 6.400 | 6.037 | 5.850 | 6.105 | 19.684 | asparagine-rich antigen, putative                          |
| PVVCY_1306270 | 4.345 | 3.420 | 2.998 | 3.763 | 19.685 | 6-cysteine protein                                         |
| PVVCY_0400820 | 6.323 | 5.650 | 5.337 | 5.871 | 19.685 | N2227-like protein, putative                               |
| PVVCY_0501800 | 9.325 | 8.679 | 8.411 | 9.093 | 19.690 | bromodomain protein 1, putative                            |
| PVVCY_0101330 | 6.007 | 5.641 | 5.549 | 6.108 | 19.691 | syntaxin binding protein, putative                         |

|               |        |        |        |        |        |                                                             |
|---------------|--------|--------|--------|--------|--------|-------------------------------------------------------------|
| PVVCY_0400690 | 1.392  | 1.084  | 0.979  | 1.388  | 19.695 | conserved Plasmodium protein, unknown function              |
| PVVCY_0101400 | 8.471  | 7.841  | 7.707  | 8.841  | 19.698 | fam-b protein                                               |
| PVVCY_1204170 | 7.501  | 6.995  | 6.591  | 6.450  | 19.701 | ADP-ribosylation factor GTPase-activating protein, putative |
| PVVCY_1001180 | 5.613  | 5.247  | 5.061  | 5.341  | 19.703 | transporter, putative                                       |
| PVVCY_1103950 | 6.491  | 6.089  | 5.964  | 6.559  | 19.705 | calpain, putative                                           |
| PVVCY_0903990 | 2.410  | 1.419  | 1.088  | 2.490  | 19.713 | conserved Plasmodium protein, unknown function              |
| PVVCY_0100230 | 6.862  | 6.110  | 5.678  | 6.146  | 19.719 | ATP-dependent RNA helicase, putative                        |
| PVVCY_0601250 | 6.895  | 6.201  | 5.875  | 6.583  | 19.719 | conserved Plasmodium protein, unknown function              |
| PVVCY_0401580 | 6.994  | 6.093  | 5.917  | 7.679  | 19.721 | zinc finger protein, putative                               |
| PVVCY_0101250 | 6.381  | 5.919  | 5.774  | 6.478  | 19.722 | 6-cysteine protein                                          |
| PVVCY_1301090 | 6.245  | 5.837  | 5.641  | 6.045  | 19.723 | serine threonine kinase-1, putative                         |
| PVVCY_0401730 | 6.555  | 6.118  | 5.888  | 6.216  | 19.724 | mitochondrial carrier protein, putative                     |
| PVVCY_1202870 | 5.729  | 5.184  | 4.941  | 5.508  | 19.724 | inositol 5-phosphatase, putative                            |
| PVVCY_1301910 | 7.068  | 6.107  | 5.620  | 6.402  | 19.724 | conserved Plasmodium protein, unknown function              |
| PVVCY_1401650 | 3.153  | 2.729  | 2.668  | 3.647  | 19.727 | SAS6-like protein, putative                                 |
| PVVCY_0500970 | 8.154  | 7.534  | 7.226  | 7.811  | 19.728 | formin 2, putative                                          |
| PVVCY_0601420 | 7.150  | 6.211  | 5.785  | 6.837  | 19.730 | conserved Plasmodium protein, unknown function              |
| PVVCY_0401380 | 6.555  | 5.814  | 5.502  | 6.354  | 19.730 | conserved Plasmodium protein, unknown function              |
| PVVCY_1303450 | 7.922  | 7.661  | 7.454  | 7.396  | 19.731 | splicing factor U2AF large subunit, putative                |
| PVVCY_1103080 | 6.904  | 6.019  | 5.637  | 6.716  | 19.733 | ATP-dependent RNA helicase HAS1, putative                   |
| PVVCY_1104790 | 7.756  | 6.824  | 6.507  | 7.876  | 19.734 | lysophospholipase, putative                                 |
| PVVCY_1306660 | 5.275  | 4.682  | 4.441  | 5.171  | 19.737 | conserved Plasmodium protein, unknown function              |
| PVVCY_1001250 | 6.865  | 6.352  | 6.078  | 6.465  | 19.739 | subpellicular microtubule protein 1, putative               |
| PVVCY_0200140 | 15.766 | 15.268 | 14.916 | 14.967 | 19.739 | early transcribed membrane protein                          |
| PVVCY_1102000 | 4.074  | 3.750  | 3.647  | 4.201  | 19.744 | conserved Plasmodium protein, unknown function              |
| PVVCY_0400070 | 4.993  | 3.703  | 3.292  | 5.490  | 19.745 | fam-a protein                                               |
| PVVCY_1200490 | 5.246  | 4.750  | 4.442  | 4.701  | 19.753 | conserved Plasmodium protein, unknown function              |

|               |        |        |        |        |        |                                                   |
|---------------|--------|--------|--------|--------|--------|---------------------------------------------------|
| PVVCY_1302810 | 8.391  | 7.786  | 7.495  | 8.149  | 19.753 | conserved Plasmodium protein, unknown function    |
| PVVCY_0100470 | 8.530  | 8.065  | 7.700  | 7.637  | 19.754 | conserved Plasmodium protein, unknown function    |
| PVVCY_0801080 | 4.636  | 3.874  | 3.418  | 3.885  | 19.754 | dynein-related AAA-type ATPase, putative          |
| PVVCY_0501930 | 6.062  | 5.627  | 5.315  | 5.375  | 19.756 | tRNA pseudouridine synthase D, putative           |
| PVVCY_1201190 | 6.801  | 6.303  | 5.926  | 5.937  | 19.758 | NLI interacting factor-like phosphatase, putative |
| PVVCY_1302720 | 3.229  | 2.086  | 1.601  | 3.251  | 19.759 | thioredoxin-like protein                          |
| PVVCY_1300320 | 7.927  | 7.546  | 7.412  | 8.082  | 19.759 | conserved Plasmodium protein, unknown function    |
| PVVCY_0903610 | 1.681  | 1.114  | 0.889  | 1.714  | 19.764 | conserved Plasmodium protein, unknown function    |
| PVVCY_1405570 | 5.484  | 5.679  | 5.949  | 6.450  | 19.764 | phosphohydrolase, putative                        |
| PVVCY_0900200 | 2.061  | 1.283  | 0.977  | 2.229  | 19.767 | lysophospholipase, putative                       |
| PVVCY_0701270 | 12.270 | 11.246 | 10.881 | 12.563 | 19.767 | high mobility group protein B2, putative          |
| PVVCY_1400870 | 7.952  | 7.280  | 6.908  | 7.470  | 19.768 | conserved Plasmodium protein, unknown function    |
| PVVCY_1300120 | 11.772 | 10.973 | 10.631 | 11.713 | 19.769 | fam-a protein                                     |
| PVVCY_1400080 | 4.433  | 3.229  | 2.906  | 5.334  | 19.770 | fam-b protein                                     |
| PVVCY_0400380 | 2.502  | 1.834  | 1.494  | 2.202  | 19.779 | circumsporozoite (CS) protein, putative           |
| PVVCY_0200090 | 1.187  | 0.608  | 0.551  | 2.157  | 19.779 | lysophospholipase, putative                       |
| PVVCY_1202140 | 2.475  | 2.041  | 1.896  | 2.670  | 19.780 | conserved Plasmodium protein, unknown function    |
| PVVCY_1102650 | 2.597  | 2.032  | 1.787  | 2.561  | 19.780 | conserved Plasmodium protein, unknown function    |
| PVVCY_1202110 | 10.869 | 9.429  | 8.623  | 9.977  | 19.781 | lysophospholipase, putative                       |
| PVVCY_0600010 | 3.181  | 2.197  | 1.793  | 3.356  | 19.781 | lysophospholipase, putative                       |
| PVVCY_0802030 | 2.785  | 2.488  | 2.502  | 3.573  | 19.781 | dynein intermediate chain, putative               |
| PVVCY_1101220 | 10.780 | 10.379 | 10.169 | 10.571 | 19.781 | inositol-3-phosphate synthase, putative           |
| PVVCY_1003640 | 5.825  | 5.167  | 4.832  | 5.601  | 19.783 | conserved Plasmodium protein, unknown function    |
| PVVCY_1303030 | 6.619  | 6.076  | 5.736  | 6.049  | 19.783 | conserved Plasmodium protein, unknown function    |
| PVVCY_0701880 | 5.896  | 4.815  | 4.344  | 5.996  | 19.791 | conserved Plasmodium protein, unknown function    |
| PVVCY_0201310 | 8.067  | 7.466  | 7.086  | 7.482  | 19.794 | 60S ribosomal export protein NMD3, putative       |
| PVVCY_1403120 | 3.081  | 2.483  | 2.181  | 2.915  | 19.795 | conserved Plasmodium protein, unknown function    |

|               |        |        |        |        |        |                                                        |
|---------------|--------|--------|--------|--------|--------|--------------------------------------------------------|
| PVVCY_1203320 | 4.728  | 4.253  | 3.956  | 4.330  | 19.796 | UTP--glucose-1-phosphate uridylyltransferase, putative |
| PVVCY_0700010 | 6.997  | 6.339  | 6.078  | 7.313  | 19.798 | lysophospholipase, putative                            |
| PVVCY_0802970 | 1.289  | 1.041  | 1.046  | 2.011  | 19.799 | conserved Plasmodium protein, unknown function         |
| PVVCY_0500950 | 11.561 | 10.843 | 10.276 | 10.249 | 19.800 | conserved Plasmodium protein, unknown function         |
| PVVCY_1203450 | 6.896  | 6.382  | 6.082  | 6.594  | 19.800 | secreted ookinete protein, putative                    |
| PVVCY_1200970 | 2.975  | 2.455  | 2.298  | 3.525  | 19.805 | conserved Plasmodium protein, unknown function         |
| PVVCY_1404380 | 10.737 | 9.937  | 9.552  | 10.657 | 19.805 | conserved Plasmodium protein, unknown function         |
| PVVCY_1302300 | 3.670  | 3.048  | 2.694  | 3.303  | 19.806 | conserved Plasmodium protein, unknown function         |
| PVVCY_0900180 | 13.176 | 11.099 | 10.101 | 13.260 | 19.807 | fam-a protein                                          |
| PVVCY_1103350 | 3.978  | 3.383  | 3.080  | 3.833  | 19.807 | conserved Plasmodium protein, unknown function         |
| PVVCY_1203960 | 4.915  | 4.174  | 3.962  | 5.678  | 19.811 | conserved Plasmodium protein, unknown function         |
| PVVCY_1405720 | 10.329 | 8.897  | 8.111  | 9.838  | 19.812 | mitochondrial carrier protein, putative                |
| PVVCY_0100960 | 6.814  | 6.099  | 5.831  | 7.310  | 19.814 | conserved Plasmodium protein, unknown function         |
| PVVCY_1303950 | 5.580  | 4.831  | 4.519  | 5.816  | 19.815 | conserved Plasmodium protein, unknown function         |
| PVVCY_1102520 | 6.192  | 5.726  | 5.458  | 5.918  | 19.815 | sphingomyelin synthase 2, putative                     |
| PVVCY_1002600 | 5.868  | 5.216  | 4.782  | 5.203  | 19.816 | conserved Plasmodium protein, unknown function         |
| PVVCY_0602300 | 4.859  | 4.334  | 4.070  | 4.788  | 19.824 | conserved Plasmodium protein, unknown function         |
| PVVCY_0600350 | 5.877  | 5.399  | 5.084  | 5.427  | 19.827 | conserved Plasmodium protein, unknown function         |
| PVVCY_1201210 | 9.557  | 8.867  | 8.340  | 8.474  | 19.831 | autophagy-related protein 18, putative                 |
| PVVCY_1204290 | 7.522  | 6.820  | 6.452  | 7.458  | 19.835 | conserved Plasmodium protein, unknown function         |
| PVVCY_0101260 | 8.720  | 8.116  | 7.700  | 8.072  | 19.842 | nucleolar GTP-binding protein 1, putative              |
| PVVCY_1400120 | 0.534  | 0.092  | 0.000  | 1.378  | 19.844 | PIR protein CIR protein                                |
| PVVCY_1001780 | 2.984  | 2.549  | 2.285  | 2.750  | 19.847 | inner membrane complex suture component, putative      |
| PVVCY_0601410 | 6.706  | 6.138  | 5.752  | 6.136  | 19.847 | protein SDA1, putative                                 |
| PVVCY_1200880 | 1.345  | 0.967  | 0.826  | 1.694  | 19.849 | tubulin--tyrosine ligase, putative                     |
| PVVCY_0800710 | 7.167  | 6.576  | 6.223  | 6.890  | 19.850 | protein SOF1, putative                                 |
| PVVCY_0801040 | 5.099  | 4.592  | 4.283  | 4.844  | 20.027 | conserved Plasmodium protein, unknown function         |



|               |        |        |        |        |        |                                                            |
|---------------|--------|--------|--------|--------|--------|------------------------------------------------------------|
| PVVCY_1405740 | 7.730  | 6.893  | 6.369  | 7.233  | 20.032 | ATP-dependent RNA helicase DBP9, putative                  |
| PVVCY_1400690 | 7.090  | 6.709  | 6.567  | 7.494  | 20.036 | conserved Plasmodium protein, unknown function             |
| PVVCY_0602040 | 7.745  | 7.049  | 6.611  | 7.337  | 20.037 | U3 small nucleolar RNA-associated protein 7, putative      |
| PVVCY_1302970 | 12.576 | 11.588 | 11.041 | 12.498 | 20.041 | fam-a protein                                              |
| PVVCY_0903740 | 7.155  | 6.312  | 5.905  | 7.480  | 20.041 | conserved Plasmodium protein, unknown function             |
| PVVCY_0300550 | 5.476  | 5.416  | 5.503  | 6.257  | 20.043 | conserved Plasmodium protein, unknown function             |
| PVVCY_0301630 | 6.995  | 6.612  | 6.416  | 7.094  | 20.048 | pre-mRNA-processing protein 45, putative                   |
| PVVCY_1104760 | 10.724 | 9.789  | 9.177  | 10.082 | 20.051 | erythrocyte membrane associated protein 2, putative        |
| PVVCY_1003780 | 2.408  | 2.008  | 1.867  | 2.939  | 20.053 | alpha_beta hydrolase, putative                             |
| PVVCY_1201020 | 5.936  | 5.384  | 5.128  | 6.261  | 20.054 | inner membrane complex sub-compartment protein 1, putative |
| PVVCY_0801430 | 7.525  | 7.643  | 7.818  | 8.259  | 20.055 | conserved Plasmodium protein, unknown function             |
| PVVCY_0500060 | 1.361  | 1.041  | 0.963  | 2.033  | 20.056 | CIR protein PIR protein                                    |
| PVVCY_1103970 | 6.083  | 5.587  | 5.281  | 5.884  | 20.056 | conserved Plasmodium protein, unknown function             |
| PVVCY_1100500 | 5.949  | 5.506  | 5.225  | 5.732  | 20.065 | conserved Plasmodium protein, unknown function             |
| PVVCY_0700810 | 2.185  | 2.051  | 2.058  | 2.752  | 20.067 | conserved Plasmodium protein, unknown function             |
| PVVCY_1306850 | 11.600 | 10.772 | 10.226 | 11.053 | 20.067 | exported protein IBIS1, putative                           |
| PVVCY_1304690 | 3.097  | 2.661  | 2.421  | 3.156  | 20.071 | conserved Plasmodium protein, unknown function             |
| PVVCY_0400340 | 8.516  | 7.874  | 7.483  | 8.343  | 20.073 | EH domain-containing protein, putative                     |
| PVVCY_1104220 | 5.252  | 4.395  | 3.850  | 4.878  | 20.077 | conserved Plasmodium protein, unknown function             |
| PVVCY_0301490 | 6.942  | 6.479  | 6.239  | 7.130  | 20.079 | AP-2 complex subunit sigma, putative                       |
| PVVCY_0902230 | 7.764  | 6.985  | 6.480  | 7.376  | 20.081 | conserved Plasmodium protein, unknown function             |
| PVVCY_0900710 | 6.977  | 6.362  | 5.918  | 6.366  | 20.087 | pescafillo homolog, putative                               |
| PVVCY_1402200 | 8.209  | 7.441  | 6.831  | 7.055  | 20.093 | conserved Plasmodium protein, unknown function             |
| PVVCY_1403950 | 6.848  | 6.327  | 5.950  | 6.337  | 20.094 | diphthine--ammonia ligase, putative                        |
| PVVCY_1301140 | 8.506  | 7.861  | 7.410  | 7.993  | 20.096 | ATP-dependent RNA helicase DDX5, putative                  |
| PVVCY_1404230 | 6.784  | 6.306  | 6.035  | 6.871  | 20.096 | conserved Plasmodium protein, unknown function             |
| PVVCY_0501840 | 3.399  | 2.405  | 1.831  | 3.526  | 20.100 | conserved Plasmodium protein, unknown function             |

|               |        |        |        |        |        |                                                         |
|---------------|--------|--------|--------|--------|--------|---------------------------------------------------------|
| PVVCY_0802070 | 5.308  | 4.840  | 4.533  | 5.092  | 20.101 | conserved Plasmodium protein, unknown function          |
| PVVCY_0300180 | 5.937  | 5.760  | 5.762  | 6.750  | 20.106 | repetitive organellar protein, putative                 |
| PVVCY_1002310 | 2.667  | 1.693  | 1.110  | 2.702  | 20.109 | conserved Plasmodium protein, unknown function          |
| PVVCY_0802930 | 3.655  | 3.045  | 2.649  | 3.460  | 20.113 | conserved Plasmodium protein, unknown function          |
| PVVCY_1400970 | 8.487  | 7.778  | 7.275  | 7.930  | 20.114 | H_ACA ribonucleoprotein complex subunit 1, putative     |
| PVVCY_0400140 | 9.524  | 8.808  | 8.272  | 8.762  | 20.116 | fam-a protein                                           |
| PVVCY_0501390 | 8.009  | 7.499  | 7.135  | 7.610  | 20.117 | LEM3_CDC50 family protein, putative                     |
| PVVCY_1403610 | 5.799  | 5.435  | 5.239  | 6.045  | 20.131 | AP-2 complex subunit mu, putative                       |
| PVVCY_0802280 | 6.987  | 6.641  | 6.394  | 6.739  | 20.132 | conserved Plasmodium protein, unknown function          |
| PVVCY_0300380 | 2.739  | 2.098  | 1.657  | 2.426  | 20.133 | conserved Plasmodium protein, unknown function          |
| PVVCY_0900170 | 8.404  | 7.369  | 6.722  | 8.434  | 20.137 | haloacid dehalogenase-like hydrolase, putative          |
| PVVCY_0803460 | 2.649  | 1.726  | 1.226  | 3.369  | 20.144 | fam-a protein                                           |
| PVVCY_0500740 | 4.098  | 3.527  | 3.157  | 4.044  | 20.145 | phospholipid scramblase, putative                       |
| PVVCY_1202930 | 3.232  | 2.434  | 1.838  | 2.529  | 20.148 | conserved Plasmodium protein, unknown function          |
| PVVCY_1100390 | 9.233  | 8.886  | 8.587  | 8.601  | 20.153 | serine_arginine-rich splicing factor 12, putative       |
| PVVCY_1004040 | 6.904  | 6.657  | 6.534  | 7.228  | 20.159 | conserved Plasmodium protein, unknown function          |
| PVVCY_0902780 | 12.108 | 11.510 | 11.097 | 11.938 | 20.167 | parasitophorous vacuolar protein 1, putative            |
| PVVCY_0200290 | 7.114  | 6.593  | 6.243  | 7.064  | 20.171 | phosphatidylinositol-4-phosphate 5-kinase, putative     |
| PVVCY_1303750 | 5.481  | 4.966  | 4.597  | 5.261  | 20.178 | conserved Plasmodium protein, unknown function          |
| PVVCY_1104440 | 5.097  | 4.602  | 4.269  | 5.118  | 20.186 | NADH-cytochrome b5 reductase, putative                  |
| PVVCY_0101420 | 8.405  | 7.299  | 6.499  | 7.950  | 20.189 | fam-a protein                                           |
| PVVCY_1203970 | 6.987  | 6.414  | 5.993  | 6.751  | 20.201 | conserved Plasmodium membrane protein, unknown function |
| PVVCY_0601500 | 7.050  | 6.639  | 6.234  | 5.879  | 20.203 | conserved Plasmodium membrane protein, unknown function |
| PVVCY_1101900 | 6.849  | 6.222  | 5.719  | 6.185  | 20.205 | conserved Plasmodium protein, unknown function          |
| PVVCY_1303870 | 4.840  | 4.401  | 4.100  | 4.903  | 20.208 | conserved Plasmodium protein, unknown function          |
| PVVCY_0400920 | 6.568  | 5.860  | 5.289  | 5.833  | 20.215 | phosphoglycerate mutase, putative                       |
| PVVCY_0701030 | 8.463  | 7.794  | 7.287  | 8.127  | 20.217 | conserved Plasmodium protein, unknown function          |

|               |        |        |        |        |        |                                                            |
|---------------|--------|--------|--------|--------|--------|------------------------------------------------------------|
| PVVCY_1301340 | 6.210  | 5.513  | 4.941  | 5.422  | 20.221 | U3 small nucleolar RNA-associated protein 12, putative     |
| PVVCY_1402340 | 1.834  | 1.416  | 1.142  | 2.098  | 20.223 | calcium_calmodulin-dependent protein kinase, putative      |
| PVVCY_1300140 | 8.688  | 7.778  | 7.102  | 8.426  | 20.224 | fam-a protein                                              |
| PVVCY_1202580 | 2.413  | 2.021  | 1.760  | 2.665  | 20.233 | conserved Plasmodium protein, unknown function             |
| PVVCY_0402050 | 3.560  | 2.723  | 2.098  | 3.369  | 20.234 | Plasmodium exported protein, unknown function              |
| PVVCY_1300180 | 2.379  | 1.573  | 0.940  | 1.886  | 20.238 | lysophospholipase, putative                                |
| PVVCY_0803110 | 5.546  | 5.256  | 4.990  | 4.947  | 20.245 | conserved Plasmodium protein, unknown function             |
| PVVCY_0200070 | 13.249 | 12.180 | 11.336 | 12.682 | 20.251 | fam-a protein                                              |
| PVVCY_0100930 | 6.642  | 6.144  | 5.757  | 6.458  | 20.253 | conserved Plasmodium protein, unknown function             |
| PVVCY_1403500 | 6.885  | 6.246  | 5.742  | 6.558  | 20.254 | multiple RNA-binding domain-containing protein 1, putative |
| PVVCY_1203090 | 4.797  | 4.521  | 4.310  | 4.751  | 20.254 | conserved Plasmodium protein, unknown function             |
| PVVCY_0700480 | 6.341  | 5.888  | 5.555  | 6.430  | 20.259 | conserved Plasmodium protein, unknown function             |
| PVVCY_1101640 | 8.602  | 8.454  | 8.360  | 8.823  | 20.261 | NLI interacting factor-like phosphatase, putative          |
| PVVCY_0500490 | 5.287  | 4.868  | 4.537  | 5.128  | 20.264 | conserved Plasmodium protein, unknown function             |
| PVVCY_1002900 | 5.361  | 4.894  | 4.528  | 5.233  | 20.267 | ATP-dependent rRNA helicase SPB4, putative                 |
| PVVCY_1000640 | 7.673  | 7.095  | 6.597  | 6.972  | 20.271 | conserved Plasmodium protein, unknown function             |
| PVVCY_1203780 | 7.753  | 7.127  | 6.601  | 7.199  | 20.278 | S-adenosylmethionine-dependent methyltransferase, putative |
| PVVCY_0903370 | 12.595 | 11.951 | 11.397 | 11.883 | 20.281 | protein phosphatase PPM8, putative                         |
| PVVCY_0700930 | 7.055  | 6.688  | 6.364  | 6.534  | 20.287 | ATP-dependent RNA helicase DHX36, putative                 |
| PVVCY_1400160 | 10.872 | 9.768  | 8.874  | 10.452 | 20.287 | Plasmodium exported protein, unknown function              |
| PVVCY_1306750 | 6.716  | 7.032  | 7.383  | 8.147  | 20.288 | conserved Plasmodium protein, unknown function             |
| PVVCY_1003430 | 6.120  | 5.660  | 5.281  | 5.883  | 20.290 | diphthamide biosynthesis protein 1, putative               |
| PVVCY_1000680 | 8.473  | 8.203  | 7.965  | 8.143  | 20.303 | ribosomal protein S8e, putative                            |
| PVVCY_1400610 | 5.945  | 5.437  | 5.001  | 5.516  | 20.304 | conserved Plasmodium protein, unknown function             |
| PVVCY_0300240 | 7.347  | 6.753  | 6.259  | 7.072  | 20.306 | protein MAK16, putative                                    |
| PVVCY_1000630 | 7.290  | 6.656  | 6.098  | 6.551  | 20.307 | AAA family ATPase, putative                                |
| PVVCY_1306020 | 7.353  | 6.517  | 5.793  | 6.631  | 20.313 | conserved Plasmodium protein, unknown function             |

|               |        |        |        |        |        |                                                          |
|---------------|--------|--------|--------|--------|--------|----------------------------------------------------------|
| PVVCY_1305280 | 7.367  | 6.895  | 6.495  | 7.076  | 20.314 | conserved Plasmodium protein, unknown function           |
| PVVCY_0100690 | 8.971  | 8.677  | 8.390  | 8.222  | 20.322 | translation initiation factor IF-2, putative             |
| PVVCY_1303670 | 6.208  | 5.529  | 4.942  | 5.809  | 20.330 | RNA 3'-terminal phosphate cyclase-like protein, putative |
| PVVCY_1306780 | 5.030  | 4.558  | 4.171  | 5.165  | 20.334 | ABC transporter B family member 6, putative              |
| PVVCY_1003220 | 6.974  | 6.605  | 6.268  | 6.438  | 20.338 | dimethyladenosine transferase, putative                  |
| PVVCY_1104800 | 6.642  | 5.764  | 5.014  | 6.469  | 20.341 | fam-c protein                                            |
| PVVCY_1402600 | 9.160  | 8.549  | 7.976  | 8.079  | 20.344 | conserved Plasmodium protein, unknown function           |
| PVVCY_0500310 | 5.472  | 5.057  | 4.685  | 5.064  | 20.345 | conserved Plasmodium protein, unknown function           |
| PVVCY_1001830 | 6.884  | 6.384  | 5.942  | 6.515  | 20.346 | large subunit GTPase 1, putative                         |
| PVVCY_0101570 | 2.698  | 2.465  | 2.320  | 3.780  | 20.348 | CIR protein PIR protein                                  |
| PVVCY_1300670 | 11.170 | 10.607 | 10.109 | 10.827 | 20.351 | conserved Plasmodium protein, unknown function           |
| PVVCY_1304850 | 8.192  | 7.414  | 6.742  | 8.048  | 20.352 | RNA-binding protein, putative                            |
| PVVCY_0300640 | 4.520  | 3.969  | 3.443  | 3.511  | 20.353 | conserved Plasmodium protein, unknown function           |
| PVVCY_0100640 | 5.245  | 4.632  | 4.132  | 5.830  | 20.355 | conserved Plasmodium protein, unknown function           |
| PVVCY_1405600 | 7.400  | 6.664  | 6.026  | 7.296  | 20.355 | conserved Plasmodium protein, unknown function           |
| PVVCY_0904370 | 9.964  | 9.233  | 8.530  | 8.609  | 20.363 | dynamamin-like protein, putative                         |
| PVVCY_0401360 | 1.156  | 0.748  | 0.399  | 1.732  | 20.364 | zinc finger protein, putative                            |
| PVVCY_1401550 | 9.031  | 8.618  | 8.218  | 8.216  | 20.365 | zinc finger (CCCH type) protein, putative                |
| PVVCY_1003940 | 4.703  | 4.240  | 3.853  | 5.096  | 20.365 | conserved Plasmodium protein, unknown function           |
| PVVCY_0301170 | 7.499  | 7.089  | 6.687  | 6.448  | 20.369 | conserved Plasmodium protein, unknown function           |
| PVVCY_1100470 | 6.073  | 6.103  | 6.154  | 6.718  | 20.373 | ATP-dependent RNA helicase DDX27, putative               |
| PVVCY_0601850 | 9.539  | 9.107  | 8.049  | 8.544  | 22.679 | phosphoinositide-binding protein, putative               |
| PVVCY_0802250 | 6.508  | 6.346  | 5.849  | 6.162  | 22.715 | conserved Plasmodium protein, unknown function           |
| PVVCY_1302400 | 5.840  | 5.647  | 5.017  | 5.438  | 22.719 | DNA-directed RNA polymerase III subunit RPC5, putative   |
| PVVCY_1003900 | 6.267  | 5.836  | 4.614  | 5.288  | 22.728 | tRNA-dihydrouridine synthase, putative                   |
| PVVCY_1306610 | 5.664  | 5.755  | 5.039  | 6.247  | 22.737 | conserved Plasmodium protein, unknown function           |
| PVVCY_1103560 | 6.803  | 6.630  | 5.758  | 6.547  | 22.744 | conserved Plasmodium protein, unknown function           |

|               |        |        |       |       |        |                                                    |
|---------------|--------|--------|-------|-------|--------|----------------------------------------------------|
| PVVCY_1305650 | 6.710  | 6.528  | 6.219 | 6.209 | 22.755 | exosome complex component RRP42, putative          |
| PVVCY_1003390 | 7.864  | 7.910  | 7.146 | 8.282 | 22.762 | conserved Plasmodium protein, unknown function     |
| PVVCY_0500680 | 6.262  | 6.106  | 5.196 | 6.053 | 22.763 | conserved Plasmodium protein, unknown function     |
| PVVCY_1200750 | 5.207  | 5.358  | 5.293 | 5.736 | 22.765 | conserved Plasmodium protein, unknown function     |
| PVVCY_1301250 | 7.749  | 7.836  | 7.187 | 8.260 | 22.767 | conserved Plasmodium protein, unknown function     |
| PVVCY_0101500 | 9.420  | 8.874  | 7.660 | 8.003 | 22.774 | fam-a protein                                      |
| PVVCY_1202920 | 10.313 | 9.451  | 7.273 | 8.144 | 22.782 | glutamate dehydrogenase, putative                  |
| PVVCY_0901640 | 7.386  | 6.806  | 5.649 | 5.830 | 22.783 | heat shock protein 90, putative                    |
| PVVCY_1301120 | 8.441  | 8.273  | 7.767 | 8.044 | 22.786 | conserved Plasmodium protein, unknown function     |
| PVVCY_0800410 | 9.759  | 9.254  | 8.602 | 8.289 | 22.788 | V-type proton ATPase subunit B, putative           |
| PVVCY_0901670 | 8.602  | 8.246  | 7.125 | 7.769 | 22.789 | nucleolar protein 56, putative                     |
| PVVCY_1405780 | 10.404 | 9.892  | 8.571 | 9.102 | 22.804 | conserved Plasmodium protein, unknown function     |
| PVVCY_0902710 | 10.442 | 10.187 | 9.324 | 9.842 | 22.814 | spermidine synthase, putative                      |
| PVVCY_0902530 | 6.367  | 6.184  | 5.850 | 5.860 | 22.815 | tRNA (guanine-N(7)-)-methyltransferase, putative   |
| PVVCY_0700940 | 7.067  | 7.097  | 6.532 | 7.313 | 22.823 | conserved Plasmodium protein, unknown function     |
| PVVCY_0802350 | 6.566  | 6.485  | 5.976 | 6.431 | 22.831 | ribosomal RNA-processing protein 8, putative       |
| PVVCY_1306410 | 5.474  | 5.631  | 5.209 | 6.088 | 22.836 | step II splicing factor, putative                  |
| PVVCY_0402090 | 2.657  | 2.648  | 1.935 | 2.800 | 22.839 | CIR protein PIR protein                            |
| PVVCY_0900700 | 1.662  | 1.632  | 0.951 | 1.722 | 22.846 | conserved Plasmodium protein, unknown function     |
| PVVCY_1102130 | 6.291  | 5.999  | 4.559 | 5.674 | 22.851 | conserved Plasmodium protein, unknown function     |
| PVVCY_1101090 | 6.267  | 5.994  | 5.253 | 5.550 | 22.855 | conserved Plasmodium protein, unknown function     |
| PVVCY_1402790 | 6.738  | 6.333  | 5.452 | 5.624 | 22.862 | histone-arginine methyltransferase CARM1, putative |
| PVVCY_0701220 | 7.223  | 7.170  | 6.525 | 7.183 | 22.871 | rRNA-processing protein FCF1, putative             |
| PVVCY_0501370 | 5.560  | 5.313  | 3.921 | 5.042 | 22.876 | WD repeat-containing protein, putative             |
| PVVCY_0301210 | 7.065  | 6.972  | 6.303 | 6.895 | 22.881 | conserved Plasmodium protein, unknown function     |
| PVVCY_0900850 | 8.532  | 8.204  | 7.326 | 7.650 | 22.881 | essential nuclear protein 1, putative              |
| PVVCY_1101190 | 6.363  | 6.312  | 5.938 | 6.265 | 22.892 | RNA pseudouridylate synthase, putative             |

|               |        |        |        |        |        |                                                                         |
|---------------|--------|--------|--------|--------|--------|-------------------------------------------------------------------------|
| PVVCY_1402640 | 7.843  | 7.777  | 6.850  | 7.789  | 22.899 | conserved Plasmodium protein, unknown function                          |
| PVVCY_0601490 | 6.624  | 6.545  | 5.936  | 6.464  | 22.919 | drug_metabolite transporter, putative                                   |
| PVVCY_0501290 | 6.925  | 6.794  | 5.187  | 6.738  | 22.924 | rRNA-processing protein EBP2, putative                                  |
| PVVCY_1103210 | 9.480  | 9.257  | 8.960  | 8.820  | 22.929 | V-type proton ATPase 21 kDa proteolipid subunit, putative               |
| PVVCY_0801460 | 6.660  | 6.279  | 5.342  | 5.590  | 22.930 | conserved Plasmodium protein, unknown function                          |
| PVVCY_0902350 | 7.221  | 6.871  | 6.014  | 6.237  | 22.930 | mitochondrial import inner membrane translocase subunit TIM44, putative |
| PVVCY_1406410 | 7.695  | 7.299  | 5.845  | 6.639  | 22.937 | conserved Plasmodium protein, unknown function                          |
| PVVCY_0801730 | 10.837 | 10.709 | 10.277 | 10.489 | 22.940 | nucleosome assembly protein, putative                                   |
| PVVCY_1304210 | 3.571  | 3.333  | 2.626  | 2.912  | 22.945 | conserved Plasmodium protein, unknown function                          |
| PVVCY_1403670 | 5.341  | 5.030  | 4.101  | 4.470  | 22.962 | conserved Plasmodium protein, unknown function                          |
| PVVCY_1200810 | 7.251  | 6.935  | 6.199  | 6.343  | 22.963 | diphthine methyl ester synthase, putative                               |
| PVVCY_0903850 | 9.630  | 9.276  | 8.414  | 8.614  | 22.967 | V-type proton ATPase subunit F, putative                                |
| PVVCY_0201320 | 7.659  | 7.438  | 6.544  | 7.052  | 22.980 | ribosome biogenesis protein BRX1 homolog, putative                      |
| PVVCY_1003540 | 6.450  | 6.218  | 5.925  | 5.758  | 22.986 | deoxyhypusine synthase, putative                                        |
| PVVCY_0902580 | 6.089  | 6.065  | 5.454  | 6.061  | 22.988 | conserved Plasmodium protein, unknown function                          |
| PVVCY_0401160 | 11.585 | 11.348 | 11.029 | 10.880 | 22.989 | 60S ribosomal protein L26, putative                                     |
| PVVCY_1003150 | 9.209  | 8.532  | 6.891  | 7.243  | 22.991 | NADP-specific glutamate dehydrogenase, putative                         |
| PVVCY_0903390 | 6.994  | 6.855  | 6.220  | 6.604  | 23.001 | conserved Plasmodium membrane protein, unknown function                 |
| PVVCY_0901500 | 9.244  | 8.686  | 7.323  | 7.613  | 23.006 | dipeptidyl aminopeptidase 1, putative                                   |
| PVVCY_0902590 | 6.000  | 5.957  | 5.497  | 5.893  | 23.007 | conserved Plasmodium protein, unknown function                          |
| PVVCY_1202020 | 9.918  | 9.422  | 8.693  | 8.440  | 23.016 | heat shock protein 110, putative                                        |
| PVVCY_0803240 | 5.104  | 4.733  | 3.984  | 4.001  | 23.038 | histidine--tRNA ligase, putative                                        |
| PVVCY_1200400 | 5.565  | 5.385  | 4.162  | 5.043  | 23.045 | U3 small nucleolar RNA-associated protein 25, putative                  |
| PVVCY_1200460 | 5.876  | 5.744  | 4.850  | 5.483  | 23.060 | DnaJ protein, putative                                                  |
| PVVCY_1101860 | 9.597  | 9.236  | 8.122  | 8.514  | 23.064 | rhomoid protease ROM10, putative                                        |
| PVVCY_1300800 | 6.242  | 6.066  | 5.381  | 5.712  | 23.072 | conserved Plasmodium protein, unknown function                          |
| PVVCY_1406670 | 5.334  | 4.949  | 4.419  | 4.179  | 23.075 | tryptophan--tRNA ligase, putative                                       |

|               |        |        |        |        |        |                                                                         |
|---------------|--------|--------|--------|--------|--------|-------------------------------------------------------------------------|
| PVVCY_1304880 | 6.690  | 6.554  | 6.093  | 6.277  | 23.084 | conserved Plasmodium protein, unknown function                          |
| PVVCY_1404730 | 5.915  | 5.752  | 5.049  | 5.415  | 23.088 | WD repeat-containing protein, putative                                  |
| PVVCY_1002060 | 6.645  | 6.215  | 5.183  | 5.341  | 23.089 | protein archease, putative                                              |
| PVVCY_0802960 | 6.325  | 6.148  | 5.282  | 5.775  | 23.097 | nucleolar protein Nop52, putative                                       |
| PVVCY_1002540 | 7.541  | 7.397  | 6.737  | 7.091  | 23.103 | nucleolar GTP-binding protein 2, putative                               |
| PVVCY_1102930 | 8.669  | 8.126  | 7.045  | 7.014  | 23.121 | RNA-binding protein, putative                                           |
| PVVCY_0801270 | 6.300  | 5.950  | 4.772  | 5.195  | 23.140 | met-10+ like protein, putative                                          |
| PVVCY_1404770 | 6.819  | 6.555  | 5.807  | 5.993  | 23.147 | serine_threonine protein kinase RIO1, putative                          |
| PVVCY_1306560 | 6.289  | 5.976  | 4.986  | 5.292  | 23.166 | nucleolar preribosomal associated cytoplasmic ATPase, putative          |
| PVVCY_0400400 | 6.935  | 6.944  | 6.098  | 6.883  | 23.175 | conserved Plasmodium protein, unknown function                          |
| PVVCY_1301160 | 11.704 | 11.026 | 9.119  | 9.530  | 23.205 | M17 leucyl aminopeptidase, putative                                     |
| PVVCY_1201560 | 6.427  | 6.642  | 6.206  | 6.989  | 23.224 | U4_U6.U5 tri-snRNP-associated protein 1, putative                       |
| PVVCY_0801500 | 6.996  | 6.830  | 5.811  | 6.386  | 23.228 | methyltransferase, putative                                             |
| PVVCY_1402150 | 8.584  | 8.493  | 7.780  | 8.228  | 23.237 | conserved Plasmodium protein, unknown function                          |
| PVVCY_1301400 | 6.112  | 5.959  | 5.488  | 5.606  | 23.256 | conserved Plasmodium protein, unknown function                          |
| PVVCY_1103230 | 5.417  | 5.586  | 4.093  | 5.656  | 23.273 | 60S ribosomal protein L7-2, putative                                    |
| PVVCY_0801400 | 4.444  | 4.458  | 3.227  | 4.281  | 23.281 | conserved Plasmodium protein, unknown function                          |
| PVVCY_0601790 | 4.986  | 5.090  | 3.887  | 5.079  | 23.281 | small subunit rRNA processing protein, putative                         |
| PVVCY_0602220 | 7.421  | 7.310  | 6.634  | 6.991  | 23.291 | mitochondrial import inner membrane translocase subunit TIM14, putative |
| PVVCY_0701990 | 6.979  | 6.744  | 6.127  | 6.207  | 23.291 | conserved Plasmodium protein, unknown function                          |
| PVVCY_1100270 | 5.770  | 5.429  | 4.888  | 4.708  | 23.314 | vacuolar protein sorting-associated protein 11, putative                |
| PVVCY_0802010 | 6.576  | 6.477  | 5.644  | 6.134  | 23.325 | ribosome production factor 1, putative                                  |
| PVVCY_0301150 | 7.487  | 7.386  | 6.803  | 7.088  | 23.337 | conserved protein, unknown function                                     |
| PVVCY_0904410 | 4.639  | 4.450  | 3.975  | 4.016  | 23.337 | conserved Plasmodium protein, unknown function                          |
| PVVCY_1405450 | 11.536 | 11.329 | 10.597 | 10.804 | 23.353 | conserved protein, unknown function                                     |
| PVVCY_1304470 | 3.592  | 3.380  | 2.978  | 2.914  | 23.355 | conserved Plasmodium protein, unknown function                          |
| PVVCY_1203290 | 1.763  | 1.565  | 0.856  | 1.057  | 23.366 | conserved Plasmodium protein, unknown function                          |

|               |        |        |        |        |        |                                                                             |
|---------------|--------|--------|--------|--------|--------|-----------------------------------------------------------------------------|
| PVVCY_1305820 | 11.686 | 11.486 | 11.033 | 11.030 | 23.376 | 40S ribosomal protein S6, putative                                          |
| PVVCY_1201100 | 10.592 | 10.253 | 9.214  | 9.410  | 23.391 | PRE-binding protein, putative                                               |
| PVVCY_1401580 | 7.119  | 6.915  | 6.095  | 6.363  | 23.391 | tRNA (adenine(58)-N(1))-methyltransferase catalytic subunit TRM61, putative |
| PVVCY_1202040 | 10.946 | 10.572 | 9.141  | 9.565  | 23.408 | chloroquine resistance transporter, putative                                |
| PVVCY_1304560 | 9.123  | 8.811  | 8.058  | 8.079  | 23.410 | ribose-phosphate pyrophosphokinase, putative                                |
| PVVCY_0201450 | 8.505  | 8.303  | 7.972  | 7.863  | 23.446 | Plasmodium exported protein, unknown function                               |
| PVVCY_1302850 | 7.788  | 7.581  | 6.494  | 6.934  | 23.447 | DNA-directed RNA polymerase III subunit RPC4, putative                      |
| PVVCY_0901810 | 8.836  | 8.628  | 7.908  | 8.062  | 23.490 | conserved Plasmodium protein, unknown function                              |
| PVVCY_0601390 | 5.060  | 4.860  | 4.655  | 4.458  | 23.497 | phosphopantothencysteine synthetase, putative                               |
| PVVCY_1305930 | 7.404  | 7.127  | 6.351  | 6.426  | 23.499 | tRNA guanosine-2'-O-methyltransferase, putative                             |
| PVVCY_1204030 | 5.864  | 5.809  | 5.226  | 5.541  | 23.510 | ubiquitin fusion degradation protein 1, putative                            |
| PVVCY_0700590 | 7.196  | 7.020  | 6.201  | 6.470  | 23.526 | Fe-S cluster assembly protein DRE2, putative                                |
| PVVCY_1001030 | 8.275  | 7.996  | 6.857  | 7.166  | 23.539 | conserved Plasmodium protein, unknown function                              |
| PVVCY_0802100 | 10.389 | 9.991  | 8.513  | 8.851  | 23.549 | glutamine synthetase, putative                                              |
| PVVCY_1200640 | 4.703  | 5.138  | 4.547  | 5.670  | 23.567 | conserved Plasmodium protein, unknown function                              |
| PVVCY_1001560 | 4.860  | 4.557  | 3.003  | 3.529  | 23.586 | queuine tRNA-ribosyltransferase, putative                                   |
| PVVCY_1002610 | 5.085  | 5.161  | 4.130  | 4.933  | 23.600 | DnaJ protein, putative                                                      |
| PVVCY_0200150 | 6.188  | 5.433  | 4.336  | 3.804  | 23.606 | conserved Plasmodium protein, unknown function                              |
| PVVCY_1301100 | 4.675  | 5.051  | 2.587  | 4.811  | 23.611 | conserved Plasmodium protein, unknown function                              |
| PVVCY_1102220 | 7.519  | 7.312  | 6.264  | 6.603  | 23.614 | radical SAM protein, putative                                               |
| PVVCY_1405750 | 7.947  | 7.755  | 7.336  | 7.292  | 23.629 | tetratricopeptide repeat protein, putative                                  |
| PVVCY_1103040 | 4.988  | 5.000  | 3.656  | 4.539  | 23.631 | ribosome biogenesis protein YTM1, putative                                  |
| PVVCY_0800850 | 7.769  | 7.464  | 7.031  | 6.807  | 23.633 | conserved Plasmodium protein, unknown function                              |
| PVVCY_1401080 | 8.731  | 8.506  | 8.021  | 7.956  | 23.701 | ras-related protein Rab-5B, putative                                        |
| PVVCY_1101910 | 5.705  | 5.726  | 4.700  | 5.358  | 23.707 | conserved Plasmodium protein, unknown function                              |
| PVVCY_0601540 | 6.084  | 5.676  | 4.548  | 4.578  | 23.709 | queuine tRNA-ribosyltransferase, putative                                   |
| PVVCY_0700390 | 6.133  | 5.975  | 5.416  | 5.495  | 23.752 | SNARE protein, putative                                                     |



|               |       |       |       |       |        |                                                          |
|---------------|-------|-------|-------|-------|--------|----------------------------------------------------------|
| PVVCY_0901280 | 8.377 | 8.153 | 7.642 | 7.587 | 23.753 | GTPase-activating protein, putative                      |
| PVVCY_1202690 | 6.750 | 6.409 | 5.159 | 5.345 | 23.781 | pseudouridylate synthase, putative                       |
| PVVCY_0801070 | 7.724 | 7.427 | 6.873 | 6.722 | 23.791 | methionine aminopeptidase 2, putative                    |
| PVVCY_1004300 | 7.195 | 7.161 | 6.039 | 6.626 | 23.803 | rRNA biogenesis protein RRP5, putative                   |
| PVVCY_1305030 | 8.076 | 7.831 | 7.266 | 7.202 | 23.822 | eukaryotic translation initiation factor 6, putative     |
| PVVCY_0601980 | 5.178 | 5.560 | 5.338 | 6.058 | 23.826 | conserved Plasmodium protein, unknown function           |
| PVVCY_1400990 | 5.681 | 5.355 | 4.670 | 4.545 | 23.832 | vacuolar protein sorting-associated protein 18, putative |
| PVVCY_1404790 | 9.627 | 9.415 | 9.025 | 8.911 | 23.862 | ras-related protein Rab-2, putative                      |
| PVVCY_1406110 | 5.489 | 5.039 | 4.058 | 3.897 | 23.869 | conserved Plasmodium protein, unknown function           |
| PVVCY_0800720 | 5.645 | 5.291 | 4.301 | 4.293 | 23.872 | conserved Plasmodium protein, unknown function           |
| PVVCY_0501150 | 2.340 | 2.417 | 1.531 | 2.129 | 23.878 | biotin--acetyl-CoA-carboxylase, putative                 |
| PVVCY_1301940 | 6.294 | 6.017 | 5.359 | 5.288 | 23.879 | conserved Plasmodium protein, unknown function           |
| PVVCY_1100660 | 8.566 | 8.593 | 8.130 | 8.420 | 23.896 | 60S ribosomal subunit protein L24, putative              |
| PVVCY_0501080 | 5.933 | 5.848 | 4.851 | 5.253 | 23.899 | conserved Plasmodium protein, unknown function           |
| PVVCY_1200340 | 2.504 | 3.508 | 3.145 | 4.867 | 23.926 | conserved Plasmodium protein, unknown function           |
| PVVCY_1204610 | 5.286 | 5.068 | 4.001 | 4.229 | 23.930 | conserved Plasmodium protein, unknown function           |
| PVVCY_0800490 | 5.019 | 5.082 | 4.101 | 4.696 | 23.970 | conserved Plasmodium protein, unknown function           |
| PVVCY_1202650 | 8.312 | 8.157 | 7.155 | 7.430 | 23.978 | alpha_beta hydrolase, putative                           |
| PVVCY_0100300 | 5.242 | 5.130 | 4.537 | 4.666 | 23.994 | conserved Plasmodium protein, unknown function           |
