# Supplementary material for: A fast and cost-effective microsampling protocol incorporating reduced animal usage for time-series transcriptomics in rodent malaria parasites
Source: PubMed Central journal article supplement (PMC6347755; doi:10.1186/s12936-019-2659-4), 2019-01-25
Supplement: 12936_2019_2659_MOESM4_ESM.pdf [file 12936_2019_2659_MOESM4_ESM.pdf]

**Additional file 4.** *P. vinckei* genes ordered according to the gene expression of their orthologs in *P. falciparum*.

| <i>Pfalciparum</i> ortholog | gene_id       | 6h     | 12h    | 18h    | 24h    | Product                                                              |
|-----------------------------|---------------|--------|--------|--------|--------|----------------------------------------------------------------------|
| PF3D7_1432500               | PVVCY_1001720 | 6.742  | 6.820  | 6.176  | 5.845  | RNA methyltransferase, putative                                      |
| PF3D7_0322400               | PVVCY_1201690 | 5.483  | 5.017  | 4.399  | 4.773  | regulator of initiation factor 2, putative                           |
| PF3D7_1358900               | PVVCY_1103640 | 7.701  | 7.726  | 7.254  | 6.518  | GTP-binding protein, putative                                        |
| PF3D7_1349200               | PVVCY_1306510 | 9.406  | 9.501  | 9.156  | 8.658  | glutamate--tRNA ligase, putative                                     |
| PF3D7_1417500               | PVVCY_1003050 | 8.532  | 7.957  | 7.259  | 7.947  | H_ACA ribonucleoprotein complex subunit 4, putative                  |
| PF3D7_1311700               | PVVCY_1401430 | 6.477  | 6.356  | 6.174  | 6.029  | cytochrome c2 precursor, putative                                    |
| PF3D7_0823100               | PVVCY_0700740 | 7.415  | 7.493  | 6.784  | 6.232  | RWD domain-containing protein, putative                              |
| PF3D7_1411500               | PVVCY_1003640 | 5.825  | 5.167  | 4.832  | 5.601  | conserved Plasmodium protein, unknown function                       |
| PF3D7_1415800               | PVVCY_1003220 | 6.974  | 6.605  | 6.268  | 6.438  | dimethyladenosine transferase, putative                              |
| PF3D7_0531400               | PVVCY_1204680 | 5.406  | 5.238  | 5.279  | 4.963  | conserved Plasmodium protein, unknown function                       |
| PF3D7_1143300               | PVVCY_0904160 | 7.037  | 6.673  | 5.954  | 6.653  | DNA-directed RNA polymerases I and III subunit RPAC1, putative       |
| PF3D7_1216200               | PVVCY_1403390 | 8.898  | 9.079  | 8.796  | 7.931  | glycerol-3-phosphate dehydrogenase, putative                         |
| PF3D7_0716100               | PVVCY_0601410 | 6.706  | 6.138  | 5.752  | 6.136  | protein SDA1, putative                                               |
| PF3D7_1306900               | PVVCY_1400710 | 7.676  | 7.777  | 7.640  | 7.003  | U1 small nuclear ribonucleoprotein A, putative                       |
| PF3D7_1354300               | PVVCY_1103200 | 8.065  | 7.580  | 6.895  | 7.888  | methyltransferase, putative                                          |
| PF3D7_0727200               | PVVCY_0201100 | 6.228  | 5.976  | 5.299  | 5.218  | cysteine desulfurase, putative                                       |
| PF3D7_1367600               | PVVCY_1104450 | 7.097  | 6.574  | 5.968  | 6.945  | ribosome biogenesis protein MRT4, putative                           |
| PF3D7_0405000               | PVVCY_0800300 | 5.923  | 5.378  | 4.640  | 5.411  | ATP-dependent RNA helicase DDX51, putative                           |
| PF3D7_1213700               | PVVCY_1403150 | 8.193  | 8.170  | 7.475  | 7.465  | DNA-directed RNA polymerases I, II, and III subunit RPABC3, putative |
| PF3D7_1206600               | PVVCY_0600560 | 7.589  | 6.987  | 6.304  | 6.636  | DNA-directed RNA polymerase III subunit RPC2, putative               |
| PF3D7_0526900               | PVVCY_1204240 | 8.380  | 8.484  | 8.400  | 8.209  | transmembrane emp24 domain-containing protein, putative              |
| PF3D7_1020700               | PVVCY_0500540 | 6.327  | 5.714  | 4.770  | 5.729  | histone acetyltransferase, putative                                  |
| PF3D7_1020400               | PVVCY_0500510 | 5.426  | 5.553  | 4.828  | 4.633  | rRNA (cytosine-C(5))-methyltransferase, putative                     |
| PF3D7_1129900               | PVVCY_0902870 | 7.823  | 6.910  | 7.820  | 8.508  | major facilitator superfamily-related transporter, putative          |
| PF3D7_1402700               | PVVCY_1004470 | 6.225  | 6.325  | 6.351  | 5.642  | U2 snRNP-associated SURP motif-containing protein, putative          |
| PF3D7_0703900               | PVVCY_1000290 | 5.022  | 4.534  | 3.974  | 4.169  | conserved Plasmodium protein, unknown function                       |
| PF3D7_1109900               | PVVCY_0900860 | 11.950 | 11.836 | 11.398 | 11.260 | 60S ribosomal protein L36, putative                                  |
| PF3D7_0708400               | PVVCY_1000740 | 11.344 | 11.423 | 11.084 | 10.492 | heat shock protein 90, putative                                      |
| PF3D7_0316800               | PVVCY_0401570 | 12.740 | 12.688 | 12.251 | 11.737 | 40S ribosomal protein S15A, putative                                 |
| PF3D7_1434100               | PVVCY_1001560 | 4.860  | 4.557  | 3.003  | 3.529  | queuine tRNA-ribosyltransferase, putative                            |

|               |               |        |        |        |        |                                                                                 |
|---------------|---------------|--------|--------|--------|--------|---------------------------------------------------------------------------------|
| PF3D7_0912800 | PVVCY_0801120 | 6.420  | 6.202  | 5.424  | 5.465  | tRNA (adenine(58)-N(1))-methyltransferase non- catalytic subunit TRM6, putative |
| PF3D7_1448000 | PVVCY_1301340 | 6.210  | 5.513  | 4.941  | 5.422  | U3 small nucleolar RNA-associated protein 12, putative                          |
| PF3D7_1237600 | PVVCY_1405440 | 6.876  | 6.354  | 5.440  | 6.459  | periodic tryptophan protein 1, putative                                         |
| PF3D7_0823200 | PVVCY_0700730 | 9.382  | 8.870  | 9.433  | 9.706  | RNA-binding protein, putative                                                   |
| PF3D7_0721300 | PVVCY_0601910 | 6.103  | 5.716  | 5.290  | 5.530  | ATP-dependent RNA helicase DBP7, putative                                       |
| PF3D7_1414700 | PVVCY_1003330 | 6.440  | 6.103  | 5.047  | 5.877  | ubiquitin carboxyl-terminal hydrolase, putative                                 |
| PF3D7_1366300 | PVVCY_1104320 | 5.478  | 4.998  | 5.338  | 5.455  | conserved Plasmodium protein, unknown function                                  |
| PF3D7_0623600 | PVVCY_1102360 | 6.691  | 6.380  | 6.594  | 6.376  | conserved Plasmodium protein, unknown function                                  |
| PF3D7_0921800 | PVVCY_0802010 | 6.576  | 6.477  | 5.644  | 6.134  | ribosome production factor 1, putative                                          |
| PF3D7_1107700 | PVVCY_0900710 | 6.977  | 6.362  | 5.918  | 6.366  | pescadillo homolog, putative                                                    |
| PF3D7_1028100 | PVVCY_0501270 | 4.825  | 4.709  | 4.278  | 3.892  | protoporphyrinogen oxidase, putative                                            |
| PF3D7_0217800 | PVVCY_0301540 | 12.864 | 12.956 | 12.473 | 12.051 | 40S ribosomal protein S26, putative                                             |
| PF3D7_1010200 | PVVCY_1200940 | 6.196  | 5.795  | 4.891  | 5.377  | DNA2_NAM7 helicase, putative                                                    |
| PF3D7_1366800 | PVVCY_1104370 | 5.634  | 5.551  | 7.282  | 7.368  | phosphatidylserine synthase, putative                                           |
| PF3D7_0921800 | PVVCY_0802010 | 6.576  | 6.477  | 5.644  | 6.134  | ribosome production factor 1, putative                                          |
| PF3D7_0415300 | PVVCY_0701710 | 6.318  | 5.996  | 6.384  | 6.048  | cdc2-related protein kinase 3, putative                                         |
| PF3D7_1309000 | PVVCY_1400920 | 6.572  | 6.716  | 5.528  | 5.175  | conserved Plasmodium protein, unknown function                                  |
| PF3D7_1434500 | PVVCY_0801080 | 4.636  | 3.874  | 3.418  | 3.885  | dynein-related AAA-type ATPase, putative                                        |
| PF3D7_1124800 | PVVCY_0902280 | 7.550  | 7.253  | 6.599  | 7.335  | nuclear preribosomal assembly protein, putative                                 |
| PF3D7_1130200 | PVVCY_0902900 | 11.913 | 11.681 | 11.243 | 10.687 | 60S acidic ribosomal protein P0, putative                                       |
| PF3D7_1461300 | PVVCY_1302650 | 12.815 | 12.823 | 12.680 | 12.424 | 40S ribosomal protein S28e, putative                                            |
| PF3D7_1218600 | PVVCY_1403640 | 7.444  | 7.500  | 7.460  | 6.843  | arginine--tRNA ligase, putative                                                 |
| PF3D7_1224600 | PVVCY_1404160 | 6.199  | 6.108  | 5.284  | 5.084  | cytochrome c heme lyase, putative                                               |
| PF3D7_0626200 | PVVCY_1102620 | 4.935  | 5.509  | 3.820  | 4.118  | conserved Plasmodium protein, unknown function                                  |
| PF3D7_0707900 | PVVCY_1000680 | 8.473  | 8.203  | 7.965  | 8.143  | ribosomal protein S8e, putative                                                 |
| PF3D7_0418200 | PVVCY_0702000 | 7.639  | 7.792  | 7.070  | 6.925  | eukaryotic translation initiation factor 3 subunit M, putative                  |
| PF3D7_1302800 | PVVCY_1400300 | 11.908 | 11.895 | 11.405 | 11.183 | 40S ribosomal protein S7, putative                                              |
| PF3D7_0109800 | PVVCY_0200370 | 7.502  | 7.460  | 7.059  | 6.740  | phenylalanine--tRNA ligase alpha subunit, putative                              |
| PF3D7_1332100 | PVVCY_1304960 | 0.794  | 1.627  | 1.339  | 1.693  | conserved Plasmodium protein, unknown function                                  |
| PF3D7_1329000 | PVVCY_1304670 | 6.653  | 6.058  | 5.451  | 5.661  | DNA-directed RNA polymerase III subunit RPC1, putative                          |
| PF3D7_0622200 | PVVCY_1102220 | 7.519  | 7.312  | 6.264  | 6.603  | radical SAM protein, putative                                                   |
| PF3D7_1324000 | PVVCY_1304180 | 5.027  | 4.328  | 3.429  | 4.294  | conserved Plasmodium protein, unknown function                                  |
| PF3D7_1327700 | PVVCY_1304550 | 3.043  | 2.514  | 3.193  | 3.593  | regulator of nonsense transcripts 3B, putative                                  |
| PF3D7_0210100 | PVVCY_0300800 | 13.119 | 13.254 | 12.806 | 12.555 | 60S ribosomal protein L37ae, putative                                           |
| PF3D7_1471100 | PVVCY_1303680 | 11.497 | 11.345 | 11.083 | 11.249 | exported protein 2, putative                                                    |
| PF3D7_0530700 | PVVCY_1204610 | 5.286  | 5.068  | 4.001  | 4.229  | conserved Plasmodium protein, unknown function                                  |
| PF3D7_1005100 | PVVCY_1200400 | 5.565  | 5.385  | 4.162  | 5.043  | U3 small nucleolar RNA-associated protein 25, putative                          |

|               |               |        |        |        |        |                                                                      |
|---------------|---------------|--------|--------|--------|--------|----------------------------------------------------------------------|
| PF3D7_1351400 | PVVCY_1306720 | 12.099 | 12.039 | 11.560 | 11.319 | 60S ribosomal protein L17, putative                                  |
| PF3D7_0918900 | PVVCY_0801720 | 7.565  | 7.168  | 6.571  | 7.013  | gamma-glutamylcysteine synthetase, putative                          |
| PF3D7_0503800 | PVVCY_1100430 | 11.776 | 11.991 | 11.356 | 11.230 | 60S ribosomal protein L31, putative                                  |
| PF3D7_1032800 | PVVCY_0501710 | 6.706  | 6.937  | 6.453  | 5.496  | leucine-rich repeat protein                                          |
| PF3D7_1349200 | PVVCY_1306510 | 9.406  | 9.501  | 9.156  | 8.658  | glutamate--tRNA ligase, putative                                     |
| PF3D7_0729500 | PVVCY_0201330 | 6.469  | 6.051  | 6.230  | 6.193  | mRNA (N6-adenosine)-methyltransferase, putative                      |
| PF3D7_0818400 | PVVCY_0701220 | 7.223  | 7.170  | 6.525  | 7.183  | rRNA-processing protein FCF1, putative                               |
| PF3D7_0314500 | PVVCY_0401340 | 8.470  | 8.160  | 7.567  | 8.035  | conserved Plasmodium protein, unknown function                       |
| PF3D7_1010200 | PVVCY_1200940 | 6.196  | 5.795  | 4.891  | 5.377  | DNA2 NAM7 helicase, putative                                         |
| PF3D7_1111400 | PVVCY_0901010 | 3.818  | 4.462  | 4.370  | 3.891  | conserved Plasmodium protein, unknown function                       |
| PF3D7_1030800 | PVVCY_0501530 | 3.871  | 4.118  | 5.345  | 6.232  | calmodulin, putative                                                 |
| PF3D7_1233400 | PVVCY_1405020 | 6.771  | 6.734  | 5.830  | 6.146  | conserved Plasmodium protein, unknown function                       |
| PF3D7_1419100 | PVVCY_1002900 | 5.361  | 4.894  | 4.528  | 5.233  | ATP-dependent rRNA helicase SPB4, putative                           |
| PF3D7_0403700 | PVVCY_0800170 | 7.239  | 7.026  | 7.244  | 7.109  | pre-mRNA-splicing factor CLF1, putative                              |
| PF3D7_0502800 | PVVCY_1100340 | 4.721  | 5.658  | 4.926  | 4.112  | DnaJ protein, putative                                               |
| PF3D7_1412600 | PVVCY_1003540 | 6.450  | 6.218  | 5.925  | 5.758  | deoxyhypusine synthase, putative                                     |
| PF3D7_1366300 | PVVCY_1104320 | 5.478  | 4.998  | 5.338  | 5.455  | conserved Plasmodium protein, unknown function                       |
| PF3D7_0403700 | PVVCY_0800170 | 7.239  | 7.026  | 7.244  | 7.109  | pre-mRNA-splicing factor CLF1, putative                              |
| PF3D7_1004000 | PVVCY_1200300 | 11.819 | 11.860 | 11.252 | 11.194 | 60S ribosomal protein L13, putative                                  |
| PF3D7_1465300 | PVVCY_1303110 | 5.649  | 5.567  | 5.167  | 4.253  | tRNA 3'-trailer sequence RNase, putative                             |
| PF3D7_0516300 | PVVCY_1203200 | 6.355  | 5.547  | 5.128  | 5.255  | tRNA pseudouridine synthase, putative                                |
| PF3D7_0908600 | PVVCY_1001160 | 7.348  | 6.675  | 5.718  | 6.532  | ribosomal RNA methyltransferase, putative                            |
| PF3D7_1332400 | PVVCY_1304990 | 6.561  | 6.532  | 6.419  | 6.490  | nucleotidyltransferase, putative                                     |
| PF3D7_1410200 | PVVCY_1003770 | 8.198  | 7.663  | 6.641  | 7.036  | cytidine triphosphate synthetase, putative                           |
| PF3D7_0303300 | PVVCY_0400250 | 9.316  | 9.388  | 8.951  | 8.903  | DNA-directed RNA polymerases I, II, and III subunit RPABC2, putative |
| PF3D7_0727300 | PVVCY_0201110 | 5.005  | 5.564  | 5.591  | 4.375  | DNA (cytosine-5)-methyltransferase, putative                         |
| PF3D7_1466800 | PVVCY_1303270 | 5.181  | 4.763  | 4.080  | 4.584  | conserved Plasmodium protein, unknown function                       |
| PF3D7_1408500 | PVVCY_1003940 | 4.703  | 4.240  | 3.853  | 5.096  | conserved Plasmodium protein, unknown function                       |
| PF3D7_1134200 | PVVCY_0903290 | 6.379  | 5.804  | 5.207  | 5.737  | conserved Plasmodium protein, unknown function                       |
| PF3D7_1366800 | PVVCY_1104370 | 5.634  | 5.551  | 7.282  | 7.368  | phosphatidylserine synthase, putative                                |
| PF3D7_0823200 | PVVCY_0700730 | 9.382  | 8.870  | 9.433  | 9.706  | RNA-binding protein, putative                                        |
| PF3D7_0709600 | PVVCY_1202100 | 5.921  | 6.163  | 5.337  | 4.992  | ribonucleases P/MRP protein subunit POP1, putative                   |
| PF3D7_1451900 | PVVCY_1301720 | 7.179  | 6.732  | 6.184  | 6.245  | ribosome biogenesis protein TSR1, putative                           |
| PF3D7_0505000 | PVVCY_1100550 | 4.236  | 4.486  | 4.283  | 3.848  | conserved Plasmodium protein, unknown function                       |
| PF3D7_1142700 | PVVCY_0904100 | 6.499  | 6.397  | 5.329  | 5.491  | methyltransferase, putative                                          |
| PF3D7_1331800 | PVVCY_1304940 | 12.303 | 12.356 | 11.916 | 11.358 | 60S ribosomal protein L23, putative                                  |
| PF3D7_1412600 | PVVCY_1003540 | 6.450  | 6.218  | 5.925  | 5.758  | deoxyhypusine synthase, putative                                     |
| PF3D7_0918900 | PVVCY_0801720 | 7.565  | 7.168  | 6.571  | 7.013  | gamma-glutamylcysteine synthetase, putative                          |

|               |               |        |        |        |        |                                                                |
|---------------|---------------|--------|--------|--------|--------|----------------------------------------------------------------|
| PF3D7_0923200 | PVVCY_0802160 | 6.522  | 5.792  | 4.990  | 5.468  | nitric oxide synthase, putative                                |
| PF3D7_1353400 | PVVCY_1103110 | 6.334  | 6.130  | 6.116  | 5.886  | Ran-binding protein, putative                                  |
| PF3D7_1407500 | PVVCY_1004010 | 8.338  | 8.208  | 7.908  | 8.038  | multifunctional methyltransferase subunit TRM112, putative     |
| PF3D7_0918300 | PVVCY_0801670 | 9.242  | 9.430  | 8.767  | 8.506  | eukaryotic translation initiation factor 3 subunit F, putative |
| PF3D7_0302000 | PVVCY_0400160 | 7.405  | 7.272  | 7.236  | 7.260  | pre-mRNA-splicing factor PRP46, putative                       |
| PF3D7_0917700 | PVVCY_0801610 | 4.939  | 5.207  | 4.384  | 4.445  | XPA binding protein 1, putative                                |
| PF3D7_1441200 | PVVCY_1300680 | 11.380 | 11.186 | 10.787 | 10.499 | 60S ribosomal protein L1, putative                             |
| PF3D7_1103600 | PVVCY_0900300 | 6.068  | 6.453  | 6.465  | 5.365  | actin-like protein, putative                                   |
| PF3D7_0516200 | PVVCY_1203190 | 11.906 | 11.663 | 11.235 | 10.786 | 40S ribosomal protein S11, putative                            |
| PF3D7_1404500 | PVVCY_1004300 | 7.195  | 7.161  | 6.039  | 6.626  | rRNA biogenesis protein RRP5, putative                         |
| PF3D7_0918300 | PVVCY_0801670 | 9.242  | 9.430  | 8.767  | 8.506  | eukaryotic translation initiation factor 3 subunit F, putative |
| PF3D7_0214500 | PVVCY_0301220 | 4.943  | 5.158  | 4.779  | 4.644  | conserved Plasmodium protein, unknown function                 |
| PF3D7_0621300 | PVVCY_1102130 | 6.291  | 5.999  | 4.559  | 5.674  | conserved Plasmodium protein, unknown function                 |
| PF3D7_1242700 | PVVCY_1405820 | 12.218 | 12.105 | 11.707 | 11.567 | 40S ribosomal protein S17, putative                            |
| PF3D7_1359400 | PVVCY_1103690 | 9.528  | 8.990  | 9.639  | 9.351  | CUGBP Elav-like family member 1, putative                      |
| PF3D7_0727300 | PVVCY_0201110 | 5.005  | 5.564  | 5.591  | 4.375  | DNA (cytosine-5)-methyltransferase, putative                   |
| PF3D7_0708300 | PVVCY_1000730 | 6.917  | 7.055  | 6.622  | 5.782  | EKC_KEOPS complex subunit BUD32, putative                      |
| PF3D7_0811500 | PVVCY_1402790 | 6.738  | 6.333  | 5.452  | 5.624  | histone-arginine methyltransferase CARM1, putative             |
| PF3D7_1331700 | PVVCY_1304930 | 7.531  | 7.552  | 7.437  | 6.571  | glutamine-tRNA ligase, putative                                |
| PF3D7_0409300 | PVVCY_0800720 | 5.645  | 5.291  | 4.301  | 4.293  | conserved Plasmodium protein, unknown function                 |
| PF3D7_0308900 | PVVCY_0400780 | 6.827  | 6.439  | 6.714  | 6.339  | splicing factor 3B subunit 1, putative                         |
| PF3D7_0921200 | PVVCY_0801950 | 5.795  | 5.230  | 4.344  | 4.804  | conserved Plasmodium protein, unknown function                 |
| PF3D7_0524900 | PVVCY_1204040 | 6.568  | 5.755  | 4.773  | 5.273  | conserved Plasmodium protein, unknown function                 |
| PF3D7_1142500 | PVVCY_0904080 | 11.564 | 11.844 | 11.315 | 11.070 | 60S ribosomal protein L28, putative                            |
| PF3D7_1364500 | PVVCY_1104150 | 6.070  | 6.202  | 5.658  | 5.280  | exosome complex component RRP45, putative                      |
| PF3D7_1365400 | PVVCY_1104230 | 5.908  | 5.064  | 3.499  | 5.306  | ubiquitin-activating enzyme, putative                          |
| PF3D7_0520600 | PVVCY_1203620 | 9.032  | 8.094  | 6.538  | 8.677  | bis(5'-nucleosyl)-tetraphosphatase [asymmetrical], putative    |
| PF3D7_0317600 | PVVCY_1000930 | 12.378 | 12.371 | 11.803 | 11.555 | 40S ribosomal protein S11, putative                            |
| PF3D7_0918900 | PVVCY_0801720 | 7.565  | 7.168  | 6.571  | 7.013  | gamma-glutamylcysteine synthetase, putative                    |
| PF3D7_1360200 | PVVCY_1103760 | 7.475  | 7.510  | 7.219  | 6.809  | ER membrane protein complex subunit 3, putative                |
| PF3D7_1302800 | PVVCY_1400300 | 11.908 | 11.895 | 11.405 | 11.183 | 40S ribosomal protein S7, putative                             |
| PF3D7_1419100 | PVVCY_1002900 | 5.361  | 4.894  | 4.528  | 5.233  | ATP-dependent rRNA helicase SPB4, putative                     |
| PF3D7_1368800 | PVVCY_1104570 | 3.238  | 4.258  | 4.944  | 4.096  | DNA repair endonuclease, putative                              |
| PF3D7_0310300 | PVVCY_0400920 | 6.568  | 5.860  | 5.289  | 5.833  | phosphoglycerate mutase, putative                              |
| PF3D7_0521700 | PVVCY_1203720 | 6.594  | 6.564  | 6.145  | 5.414  | ATP-dependent RNA helicase DDX1, putative                      |
| PF3D7_1353400 | PVVCY_1103110 | 6.334  | 6.130  | 6.116  | 5.886  | Ran-binding protein, putative                                  |
| PF3D7_1130600 | PVVCY_0902940 | 5.269  | 4.695  | 4.002  | 3.968  | methyltransferase, putative                                    |

|               |               |        |        |        |        |                                                                |
|---------------|---------------|--------|--------|--------|--------|----------------------------------------------------------------|
| PF3D7_1323400 | PVVCY_1304120 | 11.778 | 11.911 | 11.429 | 11.333 | 60S ribosomal protein L23, putative                            |
| PF3D7_1307000 | PVVCY_1400720 | 7.709  | 7.782  | 7.316  | 7.015  | exosome complex component RRP40, putative                      |
| PF3D7_1021500 | PVVCY_0500620 | 6.131  | 5.661  | 5.213  | 5.886  | ATP-dependent RNA helicase ROK1, putative                      |
| PF3D7_1247200 | PVVCY_1406230 | 7.938  | 8.363  | 7.952  | 7.707  | conserved Plasmodium protein, unknown function                 |
| PF3D7_0621300 | PVVCY_1102130 | 6.291  | 5.999  | 4.559  | 5.674  | conserved Plasmodium protein, unknown function                 |
| PF3D7_1428300 | PVVCY_1002120 | 9.150  | 9.580  | 9.180  | 8.272  | proliferation-associated protein 2g4, putative                 |
| PF3D7_1349400 | PVVCY_1306530 | 6.255  | 6.134  | 5.741  | 5.001  | cytidine and deoxycytidylate deaminase, putative               |
| PF3D7_0918300 | PVVCY_0801670 | 9.242  | 9.430  | 8.767  | 8.506  | eukaryotic translation initiation factor 3 subunit F, putative |
| PF3D7_1358900 | PVVCY_1103640 | 7.701  | 7.726  | 7.254  | 6.518  | GTP-binding protein, putative                                  |
| PF3D7_0610100 | PVVCY_0101000 | 6.271  | 6.500  | 6.109  | 6.442  | pre-mRNA-splicing factor SLU7, putative                        |
| PF3D7_1358500 | PVVCY_1103600 | 6.984  | 6.656  | 6.400  | 6.234  | zinc finger protein, putative                                  |
| PF3D7_0525500 | PVVCY_1204100 | 4.992  | 4.356  | 3.395  | 3.729  | WD repeat-containing protein, putative                         |
| PF3D7_0612900 | PVVCY_0101260 | 8.720  | 8.116  | 7.700  | 8.072  | nucleolar GTP-binding protein 1, putative                      |
| PF3D7_1026100 | PVVCY_0501080 | 5.933  | 5.848  | 4.851  | 5.253  | conserved Plasmodium protein, unknown function                 |
| PF3D7_0923000 | PVVCY_0802140 | 8.470  | 8.550  | 8.189  | 7.613  | DNA-directed RNA polymerase II subunit RPB3, putative          |
| PF3D7_0827000 | PVVCY_0700360 | 6.857  | 6.450  | 5.881  | 6.576  | ATP-dependent RNA helicase DBP10, putative                     |
| PF3D7_1105900 | PVVCY_0900530 | 2.609  | 3.034  | 2.664  | 2.840  | conserved Plasmodium protein, unknown function                 |
| PF3D7_0422700 | PVVCY_0502380 | 7.862  | 7.629  | 7.418  | 7.091  | eukaryotic initiation factor 4A-III, putative                  |
| PF3D7_1129400 | PVVCY_0902810 | 6.898  | 6.127  | 5.380  | 5.788  | rRNA (cytosine-C(5))-methyltransferase, putative               |
| PF3D7_0110900 | PVVCY_0200260 | 5.682  | 5.819  | 5.442  | 5.547  | adenylate kinase-like protein 1, putative                      |
| PF3D7_0505000 | PVVCY_1100550 | 4.236  | 4.486  | 4.283  | 3.848  | conserved Plasmodium protein, unknown function                 |
| PF3D7_1026800 | PVVCY_0501140 | 11.717 | 11.630 | 11.211 | 10.787 | 40S ribosomal protein S2, putative                             |
| PF3D7_1237100 | PVVCY_1405390 | 5.792  | 5.278  | 4.349  | 4.515  | conserved Plasmodium protein, unknown function                 |
| PF3D7_0217700 | PVVCY_0301530 | 7.155  | 7.017  | 6.559  | 6.552  | E2F-associated phosphoprotein, putative                        |
| PF3D7_1323100 | PVVCY_1304090 | 11.634 | 11.779 | 11.108 | 10.933 | 60S ribosomal protein L6, putative                             |
| PF3D7_0921900 | PVVCY_0802020 | 6.444  | 6.258  | 5.523  | 6.321  | conserved Plasmodium protein, unknown function                 |
| PF3D7_1309500 | PVVCY_1400970 | 8.487  | 7.778  | 7.275  | 7.930  | H_ACA ribonucleoprotein complex subunit 1, putative            |
| PF3D7_1021200 | PVVCY_0500590 | 4.258  | 4.979  | 6.568  | 6.726  | conserved Plasmodium protein, unknown function                 |
| PF3D7_1124400 | PVVCY_0902240 | 7.000  | 7.196  | 6.122  | 6.536  | U6 snRNA-associated Sm-like protein LSm1, putative             |
| PF3D7_1465300 | PVVCY_1303110 | 5.649  | 5.567  | 5.167  | 4.253  | tRNA 3'-trailer sequence RNase, putative                       |
| PF3D7_0807000 | PVVCY_1202450 | 7.532  | 8.122  | 8.003  | 6.889  | gas41 homologue, putative                                      |
| PF3D7_0520000 | PVVCY_1203570 | 11.956 | 11.897 | 11.339 | 11.242 | 40S ribosomal protein S9, putative                             |
| PF3D7_1142600 | PVVCY_0904090 | 12.267 | 12.221 | 11.779 | 11.431 | 60S ribosomal protein L35ae, putative                          |
| PF3D7_1147500 | PVVCY_0904570 | 5.460  | 5.524  | 5.190  | 4.368  | protein farnesyltransferase subunit beta, putative             |
| PF3D7_0514600 | PVVCY_1101510 | 7.162  | 7.121  | 6.401  | 5.656  | ribose-5-phosphate isomerase, putative                         |
| PF3D7_1125500 | PVVCY_0902360 | 8.563  | 8.848  | 8.570  | 7.905  | small nuclear ribonucleoprotein Sm D1, putative                |

|               |               |        |        |        |        |                                                                |
|---------------|---------------|--------|--------|--------|--------|----------------------------------------------------------------|
| PF3D7_1414300 | PVVCY_1003380 | 12.199 | 12.076 | 11.567 | 11.299 | 60S ribosomal protein L10, putative                            |
| PF3D7_1317800 | PVVCY_1401790 | 12.911 | 12.699 | 12.282 | 11.890 | 40S ribosomal protein S19, putative                            |
| PF3D7_1449400 | PVVCY_1301470 | 2.572  | 2.337  | 4.616  | 5.124  | crossover junction endonuclease MUS81, putative                |
| PF3D7_1461900 | PVVCY_1302710 | 7.975  | 7.774  | 7.567  | 6.697  | valine--tRNA ligase, putative                                  |
| PF3D7_1012600 | PVVCY_1201180 | 8.460  | 8.310  | 7.843  | 7.231  | GMP synthase [glutamine-hydrolyzing], putative                 |
| PF3D7_0314400 | PVVCY_0401330 | 8.765  | 8.223  | 7.706  | 7.977  | serine threonine protein phosphatase 6, putative               |
| PF3D7_0923000 | PVVCY_0802140 | 8.470  | 8.550  | 8.189  | 7.613  | DNA-directed RNA polymerase II subunit RPB3, putative          |
| PF3D7_0306800 | PVVCY_0400580 | 8.699  | 8.845  | 8.454  | 7.283  | T-complex protein 1 subunit beta, putative                     |
| PF3D7_1450600 | PVVCY_1301590 | 5.779  | 6.002  | 5.613  | 5.414  | S-adenosylmethionine-dependent methyltransferase, putative     |
| PF3D7_1027400 | PVVCY_0501200 | 8.201  | 8.605  | 8.489  | 7.816  | DNA-directed RNA polymerase II subunit RPB7, putative          |
| PF3D7_1028000 | PVVCY_0501260 | 6.192  | 5.322  | 4.493  | 5.246  | methyltransferase, putative                                    |
| PF3D7_0813900 | PVVCY_1402540 | 12.684 | 12.570 | 12.108 | 11.965 | 40S ribosomal protein S16, putative                            |
| PF3D7_1471000 | PVVCY_1303670 | 6.208  | 5.529  | 4.942  | 5.809  | RNA 3'-terminal phosphate cyclase-like protein, putative       |
| PF3D7_1440500 | PVVCY_1300610 | 2.648  | 3.478  | 4.508  | 3.899  | allantoicase, putative                                         |
| PF3D7_0921900 | PVVCY_0802020 | 6.444  | 6.258  | 5.523  | 6.321  | conserved Plasmodium protein, unknown function                 |
| PF3D7_1445100 | PVVCY_1301060 | 6.299  | 6.363  | 5.895  | 5.374  | histidine--tRNA ligase, putative                               |
| PF3D7_1123600 | PVVCY_0902160 | 6.440  | 6.443  | 6.146  | 5.366  | RAP protein, putative                                          |
| PF3D7_1334200 | PVVCY_1305160 | 7.661  | 7.934  | 6.955  | 6.647  | chaperone binding protein, putative                            |
| PF3D7_1124400 | PVVCY_0902240 | 7.000  | 7.196  | 6.122  | 6.536  | U6 snRNA-associated Sm-like protein LSm1, putative             |
| PF3D7_0415900 | PVVCY_0701760 | 12.250 | 12.148 | 11.599 | 11.382 | 60S ribosomal protein L15, putative                            |
| PF3D7_0525500 | PVVCY_1204100 | 4.992  | 4.356  | 3.395  | 3.729  | WD repeat-containing protein, putative                         |
| PF3D7_0917700 | PVVCY_0801610 | 4.939  | 5.207  | 4.384  | 4.445  | XPA binding protein 1, putative                                |
| PF3D7_0213900 | PVVCY_0301170 | 7.499  | 7.089  | 6.687  | 6.448  | conserved Plasmodium protein, unknown function                 |
| PF3D7_0626000 | PVVCY_1102600 | 5.383  | 5.353  | 4.696  | 4.092  | conserved Plasmodium protein, unknown function                 |
| PF3D7_1402700 | PVVCY_1004470 | 6.225  | 6.325  | 6.351  | 5.642  | U2 snRNP-associated SURP motif-containing protein, putative    |
| PF3D7_0903100 | PVVCY_0401940 | 9.385  | 9.186  | 9.313  | 9.248  | protein RER1, putative                                         |
| PF3D7_0918900 | PVVCY_0801720 | 7.565  | 7.168  | 6.571  | 7.013  | gamma-glutamylcysteine synthetase, putative                    |
| PF3D7_1442300 | PVVCY_1300790 | 8.738  | 8.830  | 8.566  | 7.994  | tRNA import protein tRIP, putative                             |
| PF3D7_1003500 | PVVCY_1200250 | 11.320 | 11.343 | 10.819 | 10.645 | 40S ribosomal protein S20e, putative                           |
| PF3D7_1242600 | PVVCY_1405810 | 6.224  | 6.365  | 5.763  | 4.995  | protein farnesyltransferase subunit alpha, putative            |
| PF3D7_0623100 | PVVCY_1102310 | 7.919  | 7.313  | 7.499  | 7.364  | nuclear polyadenylated RNA-binding protein NAB2, putative      |
| PF3D7_1112500 | PVVCY_0901110 | 4.928  | 5.145  | 4.781  | 4.114  | conserved protein, unknown function                            |
| PF3D7_1106000 | PVVCY_0900540 | 7.389  | 7.478  | 7.223  | 6.439  | RuvB-like helicase 2, putative                                 |
| PF3D7_0621800 | PVVCY_1102180 | 11.101 | 11.149 | 10.288 | 10.156 | nascent polypeptide-associated complex subunit alpha, putative |
| PF3D7_1004000 | PVVCY_1200300 | 11.819 | 11.860 | 11.252 | 11.194 | 60S ribosomal protein L13, putative                            |
| PF3D7_0520000 | PVVCY_1203570 | 11.956 | 11.897 | 11.339 | 11.242 | 40S ribosomal protein S9, putative                             |

|               |               |        |        |        |        |                                                                     |
|---------------|---------------|--------|--------|--------|--------|---------------------------------------------------------------------|
| PF3D7_1309100 | PVVCY_1400930 | 10.726 | 10.762 | 10.249 | 10.108 | 60S ribosomal protein L24, putative                                 |
| PF3D7_1124900 | PVVCY_0902290 | 11.273 | 11.339 | 10.808 | 11.065 | 60S ribosomal protein L35, putative                                 |
| PF3D7_0719600 | PVVCY_0601740 | 11.246 | 11.306 | 10.654 | 10.785 | 60S ribosomal protein L11a, putative                                |
| PF3D7_1005600 | PVVCY_1200460 | 5.876  | 5.744  | 4.850  | 5.483  | DnaJ protein, putative                                              |
| PF3D7_1408900 | PVVCY_1003900 | 6.267  | 5.836  | 4.614  | 5.288  | tRNA-dihydrouridine synthase, putative                              |
| PF3D7_0308200 | PVVCY_0400720 | 8.518  | 8.827  | 8.455  | 7.429  | T-complex protein 1 subunit eta, putative                           |
| PF3D7_1014200 | PVVCY_1201340 | 1.032  | 0.530  | 0.940  | 1.265  | male gamete fusion factor HAP2, putative                            |
| PF3D7_1410600 | PVVCY_1003730 | 10.226 | 10.018 | 9.421  | 9.103  | eukaryotic translation initiation factor 2 subunit gamma, putative  |
| PF3D7_0304400 | PVVCY_0400360 | 12.008 | 12.015 | 11.561 | 11.577 | 60S ribosomal protein L44, putative                                 |
| PF3D7_0821700 | PVVCY_0700890 | 11.648 | 11.574 | 11.135 | 11.157 | 60S ribosomal protein L22, putative                                 |
| PF3D7_1359400 | PVVCY_1103690 | 9.528  | 8.990  | 9.639  | 9.351  | CUGBP Elav-like family member 1, putative                           |
| PF3D7_1126600 | PVVCY_0902460 | 6.325  | 3.628  | 6.094  | 7.868  | steryl ester hydrolase, putative                                    |
| PF3D7_0309600 | PVVCY_0400850 | 13.206 | 13.015 | 12.598 | 11.826 | 60S acidic ribosomal protein P2, putative                           |
| PF3D7_1367700 | PVVCY_1104460 | 7.783  | 7.673  | 7.661  | 6.976  | alanine--tRNA ligase, putative                                      |
| PF3D7_1424400 | PVVCY_1002430 | 11.886 | 11.600 | 11.186 | 10.922 | 60S ribosomal protein L7-3, putative                                |
| PF3D7_1402700 | PVVCY_1004470 | 6.225  | 6.325  | 6.351  | 5.642  | U2 snRNP-associated SURP motif-containing protein, putative         |
| PF3D7_0623100 | PVVCY_1102310 | 7.919  | 7.313  | 7.499  | 7.364  | nuclear polyadenylated RNA-binding protein NAB2, putative           |
| PF3D7_0306900 | PVVCY_0400590 | 12.442 | 12.489 | 11.856 | 11.673 | 40S ribosomal protein S23, putative                                 |
| PF3D7_1027800 | PVVCY_0501240 | 11.439 | 11.360 | 10.898 | 10.494 | 60S ribosomal protein L3, putative                                  |
| PF3D7_0209800 | PVVCY_0300780 | 9.559  | 9.460  | 9.348  | 8.873  | ATP-dependent RNA helicase UAP56, putative                          |
| PF3D7_1323400 | PVVCY_1304120 | 11.778 | 11.911 | 11.429 | 11.333 | 60S ribosomal protein L23, putative                                 |
| PF3D7_1019400 | PVVCY_0500410 | 11.981 | 11.967 | 11.562 | 11.248 | 60S ribosomal protein L30e, putative                                |
| PF3D7_1103100 | PVVCY_0900250 | 12.478 | 12.285 | 11.768 | 11.504 | 60S acidic ribosomal protein P1, putative                           |
| PF3D7_0308200 | PVVCY_0400720 | 8.518  | 8.827  | 8.455  | 7.429  | T-complex protein 1 subunit eta, putative                           |
| PF3D7_0822800 | PVVCY_0700770 | 6.867  | 6.998  | 6.814  | 6.495  | conserved Plasmodium protein, unknown function                      |
| PF3D7_0405400 | PVVCY_0800340 | 7.031  | 6.671  | 7.238  | 6.547  | pre-mRNA-processing-splicing factor 8, putative                     |
| PF3D7_1121700 | PVVCY_0901970 | 6.176  | 6.721  | 6.801  | 5.856  | protein GCN20, putative ABC transporter F family member 2, putative |
| PF3D7_0415100 | PVVCY_0701690 | 4.333  | 4.559  | 3.760  | 3.250  | conserved protein, unknown function                                 |
| PF3D7_0721600 | PVVCY_0601940 | 12.546 | 12.720 | 11.892 | 11.747 | 40S ribosomal protein S5, putative                                  |
| PF3D7_0626000 | PVVCY_1102600 | 5.383  | 5.353  | 4.696  | 4.092  | conserved Plasmodium protein, unknown function                      |
| PF3D7_0814200 | PVVCY_1402510 | 14.088 | 13.666 | 13.378 | 12.701 | DNA RNA-binding protein Alba 1, putative                            |
| PF3D7_0822300 | PVVCY_0700820 | 8.628  | 9.225  | 8.828  | 8.375  | small nuclear ribonucleoprotein G, putative                         |
| PF3D7_1461900 | PVVCY_1302710 | 7.975  | 7.774  | 7.567  | 6.697  | valine--tRNA ligase, putative                                       |
| PF3D7_0918300 | PVVCY_0801670 | 9.242  | 9.430  | 8.767  | 8.506  | eukaryotic translation initiation factor 3 subunit F, putative      |
| PF3D7_0306700 | PVVCY_0400570 | 8.044  | 8.262  | 8.419  | 7.797  | membrane magnesium transporter, putative                            |
| PF3D7_1135800 | PVVCY_0903430 | 6.700  | 6.686  | 5.633  | 5.902  | conserved Plasmodium protein, unknown function                      |
| PF3D7_0403700 | PVVCY_0800170 | 7.239  | 7.026  | 7.244  | 7.109  | pre-mRNA-splicing factor CLF1, putative                             |
| PF3D7_1128200 | PVVCY_0902640 | 8.283  | 8.316  | 8.249  | 7.789  | multiprotein-bridging factor 1, putative                            |

|               |               |        |        |        |        |                                                                                                |
|---------------|---------------|--------|--------|--------|--------|------------------------------------------------------------------------------------------------|
| PF3D7_0516900 | PVVCY_1203260 | 12.238 | 12.012 | 11.767 | 11.280 | 60S ribosomal protein L2, putative<br>conserved Plasmodium protein, unknown function           |
| PF3D7_1245900 | PVVCY_1406110 | 5.489  | 5.039  | 4.058  | 3.897  |                                                                                                |
| PF3D7_0710600 | PVVCY_1202210 | 10.293 | 10.541 | 9.837  | 10.140 | 60S ribosomal protein L34, putative<br>pyridoxine biosynthesis protein PDX1, putative          |
| PF3D7_0621200 | PVVCY_1102120 | 9.794  | 9.492  | 8.130  | 8.023  |                                                                                                |
| PF3D7_1244800 | PVVCY_1406010 | 8.088  | 8.218  | 7.539  | 7.237  | zinc finger protein, putative                                                                  |
| PF3D7_1409000 | PVVCY_1003890 | 6.139  | 5.824  | 5.219  | 5.348  | WD repeat-containing protein, putative                                                         |
| PF3D7_0513500 | PVVCY_1101400 | 6.456  | 6.675  | 5.104  | 4.830  | mitochondrial import inner membrane translocase subunit TIM16, putative                        |
| PF3D7_0827000 | PVVCY_0700360 | 6.857  | 6.450  | 5.881  | 6.576  | ATP-dependent RNA helicase DBP10, putative                                                     |
| PF3D7_1419300 | PVVCY_1002880 | 6.664  | 7.205  | 6.238  | 5.883  | glutathione S-transferase, putative                                                            |
| PF3D7_0322900 | PVVCY_1201640 | 11.714 | 11.854 | 11.140 | 11.026 | 40S ribosomal protein S3A, putative<br>conserved Plasmodium protein, unknown function          |
| PF3D7_0626000 | PVVCY_1102600 | 5.383  | 5.353  | 4.696  | 4.092  |                                                                                                |
| PF3D7_1358800 | PVVCY_1103630 | 12.315 | 12.367 | 11.802 | 11.472 | 40S ribosomal protein S15, putative                                                            |
| PF3D7_0307100 | PVVCY_0400610 | 11.517 | 11.693 | 11.081 | 10.774 | 40S ribosomal protein S12, putative<br>conserved Plasmodium protein, unknown function          |
| PF3D7_0930700 | PVVCY_0802910 | 4.500  | 5.215  | 5.208  | 4.957  |                                                                                                |
| PF3D7_1315700 | PVVCY_1401580 | 7.119  | 6.915  | 6.095  | 6.363  | tRNA (adenine(58)-N(1))-methyltransferase catalytic subunit TRM61, putative                    |
| PF3D7_1461900 | PVVCY_1302710 | 7.975  | 7.774  | 7.567  | 6.697  | valine--tRNA ligase, putative                                                                  |
| PF3D7_0801800 | PVVCY_1202940 | 9.172  | 8.658  | 7.570  | 8.054  | mannose-6-phosphate isomerase, putative                                                        |
| PF3D7_1015300 | PVVCY_1201450 | 7.798  | 7.753  | 7.263  | 6.610  | methionine aminopeptidase 1b, putative                                                         |
| PF3D7_1357800 | PVVCY_1103530 | 9.251  | 9.527  | 9.484  | 8.362  | T-complex protein 1 subunit delta, putative                                                    |
| PF3D7_1420400 | PVVCY_1002770 | 8.439  | 8.170  | 7.781  | 7.345  | glycine--tRNA ligase, putative<br>small nuclear ribonucleoprotein Sm D3, putative              |
| PF3D7_0909800 | PVVCY_1001280 | 9.621  | 9.653  | 9.598  | 8.812  |                                                                                                |
| PF3D7_0822100 | PVVCY_0700850 | 5.033  | 5.676  | 5.023  | 4.091  | mediator of RNA polymerase II transcription subunit 7, putative                                |
| PF3D7_0109500 | PVVCY_0200400 | 7.221  | 7.550  | 6.876  | 6.915  | N-terminal acetyltransferase, putative<br>conserved Plasmodium protein, unknown function       |
| PF3D7_1111000 | PVVCY_0900970 | 5.929  | 5.660  | 5.569  | 5.616  |                                                                                                |
| PF3D7_0209800 | PVVCY_0300780 | 9.559  | 9.460  | 9.348  | 8.873  | ATP-dependent RNA helicase UAP56, putative                                                     |
| PF3D7_1130100 | PVVCY_0902890 | 11.461 | 11.308 | 10.922 | 10.497 | 60S ribosomal protein L38, putative<br>ER membrane protein complex subunit 2, putative         |
| PF3D7_1410000 | PVVCY_1003790 | 7.457  | 7.473  | 7.318  | 6.989  |                                                                                                |
| PF3D7_1442500 | PVVCY_1300810 | 5.362  | 5.713  | 5.409  | 4.376  | geranylgeranyl transferase type-2 subunit alpha, putative                                      |
| PF3D7_1033600 | PVVCY_0501790 | 7.387  | 7.097  | 7.263  | 7.107  | myb2 transcription factor, putative<br>erythrocyte membrane-associated antigen, putative       |
| PF3D7_0703500 | PVVCY_1000250 | 8.196  | 7.751  | 7.498  | 7.211  |                                                                                                |
| PF3D7_0921600 | PVVCY_0801990 | 5.633  | 5.112  | 4.925  | 5.041  | tetratricopeptide repeat protein, putative                                                     |
| PF3D7_1341300 | PVVCY_1305760 | 12.393 | 12.259 | 11.753 | 11.463 | 60S ribosomal protein L18-2, putative                                                          |
| PF3D7_0607000 | PVVCY_0100690 | 8.971  | 8.677  | 8.390  | 8.222  | translation initiation factor IF-2, putative<br>conserved Plasmodium protein, unknown function |
| PF3D7_1457300 | PVVCY_1302250 | 7.124  | 7.025  | 6.271  | 5.710  |                                                                                                |
| PF3D7_0212300 | PVVCY_0301010 | 8.299  | 8.104  | 7.797  | 7.439  | peptide chain release factor subunit 1, putative                                               |
| PF3D7_1472900 | PVVCY_1303860 | 4.444  | 6.008  | 6.219  | 5.421  | dihydroorotase, putative                                                                       |



|               |               |        |        |        |        |                                                             |
|---------------|---------------|--------|--------|--------|--------|-------------------------------------------------------------|
| PF3D7_1336900 | PVVCY_1305340 | 6.957  | 6.837  | 6.274  | 5.818  | tryptophan--tRNA ligase, putative                           |
| PF3D7_1406200 | PVVCY_1004140 | 7.309  | 7.271  | 7.019  | 7.009  | conserved Plasmodium protein, unknown function              |
| PF3D7_1238300 | PVVCY_1405500 | 7.292  | 7.238  | 7.295  | 7.447  | pre-mRNA-splicing factor CWC22, putative                    |
| PF3D7_0209200 | PVVCY_0300730 | 7.413  | 7.336  | 6.884  | 6.203  | 3' exoribonuclease, putative                                |
| PF3D7_0801800 | PVVCY_1202940 | 9.172  | 8.658  | 7.570  | 8.054  | mannose-6-phosphate isomerase, putative                     |
| PF3D7_1027500 | PVVCY_0501210 | 7.846  | 7.593  | 7.929  | 6.773  | conserved Plasmodium protein, unknown function              |
| PF3D7_0826700 | PVVCY_0700380 | 11.843 | 11.790 | 11.217 | 10.700 | receptor for activated c kinase, putative                   |
| PF3D7_1456300 | PVVCY_1302150 | 3.145  | 1.342  | 4.308  | 5.786  | conserved Plasmodium protein, unknown function              |
| PF3D7_1369500 | PVVCY_1104650 | 6.187  | 6.139  | 6.140  | 6.124  | conserved Plasmodium protein, unknown function              |
| PF3D7_1130600 | PVVCY_0902940 | 5.269  | 4.695  | 4.002  | 3.968  | methyltransferase, putative                                 |
| PF3D7_0527900 | PVVCY_1204340 | 7.354  | 7.423  | 7.097  | 7.186  | RNA helicase, putative                                      |
| PF3D7_0422500 | PVVCY_0502360 | 6.404  | 6.281  | 6.237  | 6.001  | pre-mRNA-splicing helicase BRR2, putative                   |
| PF3D7_0814000 | PVVCY_1402530 | 12.274 | 12.014 | 11.647 | 11.407 | 60S ribosomal protein L13-2, putative                       |
| PF3D7_1451100 | PVVCY_1301640 | 11.150 | 11.195 | 11.149 | 10.178 | elongation factor 2, putative                               |
| PF3D7_0704000 | PVVCY_1000300 | 4.526  | 4.305  | 3.870  | 3.486  | conserved Plasmodium protein, unknown function              |
| PF3D7_1015300 | PVVCY_1201450 | 7.798  | 7.753  | 7.263  | 6.610  | methionine aminopeptidase 1b, putative                      |
| PF3D7_1241600 | PVVCY_1405720 | 10.329 | 8.897  | 8.111  | 9.838  | mitochondrial carrier protein, putative                     |
| PF3D7_1337300 | PVVCY_1305380 | 5.529  | 5.110  | 5.579  | 5.268  | exoribonuclease, putative                                   |
| PF3D7_0526800 | PVVCY_1204230 | 5.831  | 6.233  | 5.931  | 5.575  | conserved Plasmodium protein, unknown function              |
| PF3D7_0312500 | PVVCY_0401130 | 7.948  | 7.192  | 7.090  | 8.083  | major facilitator superfamily-related transporter, putative |
| PF3D7_1003800 | PVVCY_1200280 | 7.275  | 7.201  | 7.252  | 6.632  | U5 small nuclear ribonuclear protein, putative              |
| PF3D7_0208800 | PVVCY_0300690 | 6.827  | 7.245  | 6.977  | 6.146  | conserved Plasmodium protein, unknown function              |
| PF3D7_1108900 | PVVCY_0900820 | 5.445  | 5.338  | 4.601  | 4.377  | conserved Plasmodium protein, unknown function              |
| PF3D7_1408600 | PVVCY_1003930 | 11.546 | 11.415 | 10.951 | 10.875 | 40S ribosomal protein S8e, putative                         |
| PF3D7_0520100 | PVVCY_1203580 | 7.136  | 7.558  | 7.032  | 5.903  | protein phosphatase PPM9, putative                          |
| PF3D7_1426000 | PVVCY_1002350 | 11.985 | 11.979 | 11.466 | 11.249 | 60S ribosomal protein L21, putative                         |
| PF3D7_1421400 | PVVCY_1002680 | 6.420  | 6.161  | 5.636  | 5.830  | DNA-directed RNA polymerase III subunit RPC6, putative      |
| PF3D7_0719700 | PVVCY_0601750 | 12.066 | 12.274 | 11.661 | 11.325 | 40S ribosomal protein S10, putative                         |
| PF3D7_0710300 | PVVCY_1202180 | 7.355  | 6.784  | 6.124  | 6.593  | conserved Plasmodium protein, unknown function              |
| PF3D7_1249100 | PVVCY_1406410 | 7.695  | 7.299  | 5.845  | 6.639  | conserved Plasmodium protein, unknown function              |
| PF3D7_0921600 | PVVCY_0801990 | 5.633  | 5.112  | 4.925  | 5.041  | tetratricopeptide repeat protein, putative                  |
| PF3D7_1105400 | PVVCY_0900480 | 11.714 | 11.633 | 11.126 | 10.793 | 40S ribosomal protein S4, putative                          |
| PF3D7_1145800 | PVVCY_0904410 | 4.639  | 4.450  | 3.975  | 4.016  | conserved Plasmodium protein, unknown function              |
| PF3D7_0704000 | PVVCY_1000300 | 4.526  | 4.305  | 3.870  | 3.486  | conserved Plasmodium protein, unknown function              |
| PF3D7_1011500 | PVVCY_1201070 | 4.735  | 4.779  | 4.836  | 4.911  | conserved Plasmodium protein, unknown function              |
| PF3D7_0525000 | PVVCY_1204050 | 7.728  | 7.333  | 6.723  | 7.363  | zinc finger protein, putative                               |
| PF3D7_0411400 | PVVCY_0601290 | 5.251  | 4.870  | 4.468  | 4.315  | DEAD box ATP-dependent RNA helicase, putative               |

|               |               |        |        |        |        |                                                                         |
|---------------|---------------|--------|--------|--------|--------|-------------------------------------------------------------------------|
| PF3D7_0705000 | PVVCY_1000400 | 5.467  | 5.620  | 5.153  | 4.865  | mRNA cap guanine-N7 methyltransferase, putative                         |
| PF3D7_0213700 | PVVCY_0301150 | 7.487  | 7.386  | 6.803  | 7.088  | conserved protein, unknown function                                     |
| PF3D7_1125400 | PVVCY_0902350 | 7.221  | 6.871  | 6.014  | 6.237  | mitochondrial import inner membrane translocase subunit TIM44, putative |
| PF3D7_1329400 | PVVCY_1304710 | 3.411  | 2.510  | 5.532  | 6.302  | AMP deaminase, putative                                                 |
| PF3D7_1327800 | PVVCY_1304560 | 9.123  | 8.811  | 8.058  | 8.079  | ribose-phosphate pyrophosphokinase, putative                            |
| PF3D7_0819500 | PVVCY_0701110 | 2.726  | 3.219  | 3.374  | 3.132  | conserved protein, unknown function                                     |
| PF3D7_1357900 | PVVCY_1103540 | 9.090  | 8.710  | 7.510  | 7.207  | pyrroline-5-carboxylate reductase, putative                             |
| PF3D7_0915400 | PVVCY_0801380 | 9.646  | 9.418  | 9.082  | 8.487  | 6-phosphofructokinase, putative                                         |
| PF3D7_0204300 | PVVCY_0300300 | 2.677  | 1.925  | 2.572  | 3.753  | conserved Plasmodium protein, unknown function                          |
| PF3D7_1027200 | PVVCY_0501180 | 5.567  | 5.821  | 5.449  | 4.560  | mitochondrial ribosomal protein S22 precursor, putative                 |
| PF3D7_1007900 | PVVCY_1200690 | 8.970  | 8.905  | 8.436  | 8.205  | eukaryotic translation initiation factor 3 subunit D, putative          |
| PF3D7_1304900 | PVVCY_1400510 | 8.465  | 8.336  | 8.088  | 7.602  | DNA-directed RNA polymerase II subunit RPB11, putative                  |
| PF3D7_1425200 | PVVCY_1002420 | 1.995  | 1.807  | 3.914  | 4.349  | enoyl-CoA hydratase, putative                                           |
| PF3D7_1426100 | PVVCY_1002340 | 10.699 | 10.876 | 9.926  | 9.876  | transcription factor 3b, putative                                       |
| PF3D7_0208800 | PVVCY_0300690 | 6.827  | 7.245  | 6.977  | 6.146  | conserved Plasmodium protein, unknown function                          |
| PF3D7_1216900 | PVVCY_1403460 | 7.097  | 6.919  | 6.626  | 6.902  | DNA-binding chaperone, putative                                         |
| PF3D7_0216300 | PVVCY_0301390 | 4.047  | 4.044  | 3.645  | 2.975  | conserved Plasmodium protein, unknown function                          |
| PF3D7_0904000 | PVVCY_0401850 | 7.575  | 7.565  | 8.887  | 8.690  | GTPase-activating protein, putative                                     |
| PF3D7_1426100 | PVVCY_1002340 | 10.699 | 10.876 | 9.926  | 9.876  | transcription factor 3b, putative                                       |
| PF3D7_1362200 | PVVCY_1103930 | 8.014  | 7.717  | 7.574  | 6.746  | RuvB-like helicase 3, putative                                          |
| PF3D7_0612800 | PVVCY_0101250 | 6.381  | 5.919  | 5.774  | 6.478  | 6-cysteine protein                                                      |
| PF3D7_1434000 | PVVCY_1001570 | 9.150  | 9.275  | 8.496  | 7.643  | CCR4-associated factor 16, putative                                     |
| PF3D7_1427800 | PVVCY_1002170 | 6.459  | 6.624  | 6.347  | 6.026  | exosome complex exonuclease RRP41, putative                             |
| PF3D7_1206200 | PVVCY_0600520 | 9.070  | 8.956  | 8.526  | 8.118  | eukaryotic translation initiation factor 3 subunit C, putative          |
| PF3D7_0309000 | PVVCY_0400790 | 6.429  | 6.372  | 5.822  | 5.762  | dual specificity protein phosphatase, putative                          |
| PF3D7_1215100 | PVVCY_1403290 | 3.122  | 3.765  | 4.951  | 4.572  | conserved Plasmodium protein, unknown function                          |
| PF3D7_1436000 | PVVCY_0800930 | 9.254  | 8.970  | 8.626  | 8.278  | glucose-6-phosphate isomerase, putative                                 |
| PF3D7_0719300 | PVVCY_0601710 | 5.922  | 6.447  | 6.332  | 5.457  | actin-related protein, putative                                         |
| PF3D7_1210300 | PVVCY_0600900 | 6.184  | 6.474  | 5.032  | 4.771  | conserved Plasmodium protein, unknown function                          |
| PF3D7_1139900 | PVVCY_0903830 | 7.824  | 8.351  | 7.990  | 7.531  | conserved protein, unknown function                                     |
| PF3D7_0304900 | PVVCY_0400400 | 6.935  | 6.944  | 6.098  | 6.883  | conserved Plasmodium protein, unknown function                          |
| PF3D7_0820000 | PVVCY_0701060 | 6.082  | 6.147  | 6.349  | 5.432  | Snf2-related CBP activator, putative                                    |
| PF3D7_0213100 | PVVCY_0301090 | 8.817  | 8.552  | 8.148  | 7.646  | protein SIS1, putative                                                  |
| PF3D7_1033100 | PVVCY_0501740 | 9.387  | 8.625  | 8.309  | 8.525  | S-adenosylmethionine decarboxylase/ornithine decarboxylase, putative    |
| PF3D7_1127300 | PVVCY_0902530 | 6.367  | 6.184  | 5.850  | 5.860  | tRNA (guanine-N(7)-)-methyltransferase, putative                        |
| PF3D7_1431700 | PVVCY_1001790 | 11.429 | 11.440 | 10.794 | 10.895 | 60S ribosomal protein L14, putative                                     |

|               |               |        |        |        |        |                                                                   |
|---------------|---------------|--------|--------|--------|--------|-------------------------------------------------------------------|
| PF3D7_1030600 | PVVCY_0501510 | 6.015  | 6.007  | 5.685  | 5.136  | tRNA N6-adenosine<br>threonylcarbamoyltransferase, putative       |
| PF3D7_1011800 | PVVCY_1201100 | 10.592 | 10.253 | 9.214  | 9.410  | PRE-binding protein, putative                                     |
| PF3D7_0214000 | PVVCY_0301180 | 8.607  | 8.864  | 8.578  | 7.458  | T-complex protein 1 subunit theta, putative                       |
| PF3D7_1336800 | PVVCY_1305330 | 7.285  | 7.423  | 6.604  | 6.285  | nuclear movement protein, putative                                |
| PF3D7_0520700 | PVVCY_1203630 | 5.820  | 5.545  | 5.481  | 5.540  | conserved Plasmodium protein, unknown<br>function                 |
| PF3D7_0622800 | PVVCY_1102280 | 8.673  | 8.714  | 8.190  | 7.497  | leucine--tRNA ligase, putative                                    |
| PF3D7_1402500 | PVVCY_1004480 | 11.316 | 11.271 | 10.800 | 10.816 | ubiquitin-40S ribosomal protein S27a,<br>putative                 |
| PF3D7_0520100 | PVVCY_1203580 | 7.136  | 7.558  | 7.032  | 5.903  | protein phosphatase PPM9, putative                                |
| PF3D7_0708800 | PVVCY_1202020 | 9.918  | 9.422  | 8.693  | 8.440  | heat shock protein 110, putative                                  |
| PF3D7_1308300 | PVVCY_1400850 | 11.305 | 11.438 | 11.168 | 10.644 | 40S ribosomal protein S27, putative                               |
| PF3D7_0306800 | PVVCY_0400580 | 8.699  | 8.845  | 8.454  | 7.283  | T-complex protein 1 subunit beta, putative                        |
| PF3D7_0218600 | PVVCY_0301620 | 5.652  | 5.277  | 4.439  | 5.316  | conserved Plasmodium protein, unknown<br>function                 |
| PF3D7_0204500 | PVVCY_0300320 | 7.640  | 7.631  | 6.589  | 6.706  | aspartate aminotransferase, putative                              |
| PF3D7_0602200 | PVVCY_0100240 | 7.673  | 7.615  | 7.055  | 6.643  | MYND finger protein, putative                                     |
| PF3D7_0913900 | PVVCY_0801230 | 4.938  | 5.468  | 4.694  | 4.389  | arginine--tRNA ligase, putative                                   |
| PF3D7_0530600 | PVVCY_1204600 | 5.556  | 5.470  | 5.417  | 5.586  | XAP-5 DNA binding protein, putative                               |
| PF3D7_1368200 | PVVCY_1104510 | 7.524  | 7.401  | 7.455  | 7.435  | ABC transporter E family member 1, putative                       |
| PF3D7_0530600 | PVVCY_1204600 | 5.556  | 5.470  | 5.417  | 5.586  | XAP-5 DNA binding protein, putative                               |
| PF3D7_0913900 | PVVCY_0801230 | 4.938  | 5.468  | 4.694  | 4.389  | arginine--tRNA ligase, putative                                   |
| PF3D7_1434300 | PVVCY_1001540 | 8.923  | 8.913  | 8.361  | 7.803  | Hsp70 Hsp90 organizing protein, putative                          |
| PF3D7_0716800 | PVVCY_0601480 | 9.659  | 9.455  | 9.039  | 8.655  | eukaryotic translation initiation factor 3<br>subunit I, putative |
| PF3D7_1342800 | PVVCY_1305900 | 10.069 | 9.245  | 7.940  | 8.235  | phosphoenolpyruvate carboxykinase, putative                       |
| PF3D7_0608700 | PVVCY_0100870 | 9.056  | 9.187  | 8.871  | 7.925  | T-complex protein 1 subunit zeta, putative                        |
| PF3D7_1445700 | PVVCY_1301120 | 8.441  | 8.273  | 7.767  | 8.044  | conserved Plasmodium protein, unknown<br>function                 |
| PF3D7_1246500 | PVVCY_1406170 | 5.772  | 5.650  | 5.314  | 4.445  | conserved Plasmodium protein, unknown<br>function                 |
| PF3D7_1359300 | PVVCY_1103680 | 6.718  | 6.563  | 6.431  | 5.949  | exosome complex exonuclease RRP44,<br>putative                    |
| PF3D7_0709300 | PVVCY_1202070 | 4.431  | 4.560  | 4.647  | 4.028  | Cg2 protein, putative                                             |
| PF3D7_0316600 | PVVCY_0401550 | 9.395  | 8.905  | 9.125  | 8.989  | formate-nitrite transporter, putative                             |
| PF3D7_1429000 | PVVCY_1002060 | 6.645  | 6.215  | 5.183  | 5.341  | protein archease, putative                                        |
| PF3D7_0422500 | PVVCY_0502360 | 6.404  | 6.281  | 6.237  | 6.001  | pre-mRNA-splicing helicase BRR2, putative                         |
| PF3D7_1244200 | PVVCY_1405960 | 6.339  | 6.487  | 6.173  | 5.574  | RNA polymerase II transcription factor B<br>subunit 2, putative   |
| PF3D7_1338300 | PVVCY_1305480 | 10.174 | 10.383 | 10.159 | 9.341  | elongation factor 1-gamma, putative                               |
| PF3D7_1022400 | PVVCY_0500710 | 6.413  | 6.935  | 8.020  | 7.507  | serine arginine-rich splicing factor 4, putative                  |
| PF3D7_1123400 | PVVCY_0902140 | 9.597  | 9.317  | 8.972  | 8.462  | translation elongation factor EF-1, subunit<br>alpha, putative    |
| PF3D7_1326400 | PVVCY_1304420 | 6.905  | 7.152  | 6.821  | 5.672  | translation initiation factor eIF-2B subunit<br>gamma, putative   |
| PF3D7_1329400 | PVVCY_1304710 | 3.411  | 2.510  | 5.532  | 6.302  | AMP deaminase, putative                                           |
| PF3D7_1314900 | PVVCY_1401500 | 5.955  | 6.170  | 6.039  | 5.193  | general transcription factor IIH subunit 2,<br>putative           |

|               |               |        |        |        |        |                                                                     |
|---------------|---------------|--------|--------|--------|--------|---------------------------------------------------------------------|
| PF3D7_0914000 | PVVCY_0801240 | 4.705  | 4.412  | 3.821  | 3.655  | pseudouridylate synthase, putative                                  |
| PF3D7_0524700 | PVVCY_1204020 | 8.982  | 8.547  | 8.794  | 8.824  | mitochondrial import receptor subunit TOM22, putative               |
| PF3D7_0612100 | PVVCY_0101180 | 7.573  | 7.752  | 7.045  | 6.929  | eukaryotic translation initiation factor 3 subunit L, putative      |
| PF3D7_0527500 | PVVCY_1204300 | 9.158  | 9.109  | 8.507  | 8.374  | Hsc70-interacting protein, putative                                 |
| PF3D7_1123400 | PVVCY_0902140 | 9.597  | 9.317  | 8.972  | 8.462  | translation elongation factor EF-1, subunit alpha, putative         |
| PF3D7_0102900 | PVVCY_0201000 | 8.469  | 8.462  | 7.929  | 7.640  | aspartate--tRNA ligase, putative                                    |
| PF3D7_1423200 | PVVCY_1002520 | 8.911  | 8.775  | 8.352  | 8.215  | peptidyl-prolyl cis-trans isomerase, putative                       |
| PF3D7_1454000 | PVVCY_1301920 | 5.688  | 5.884  | 6.163  | 5.458  | RNA-binding protein, putative                                       |
| PF3D7_0610100 | PVVCY_0101000 | 6.271  | 6.500  | 6.109  | 6.442  | pre-mRNA-splicing factor SLU7, putative                             |
| PF3D7_0503300 | PVVCY_1100390 | 9.233  | 8.886  | 8.587  | 8.601  | serine_arginine-rich splicing factor 12, putative                   |
| PF3D7_1462900 | PVVCY_1302800 | 5.425  | 5.436  | 5.151  | 4.603  | conserved Plasmodium protein, unknown function                      |
| PF3D7_1340100 | PVVCY_1305650 | 6.710  | 6.528  | 6.219  | 6.209  | exosome complex component RRP42, putative                           |
| PF3D7_1414800 | PVVCY_1003320 | 8.657  | 8.902  | 8.944  | 8.139  | small nuclear ribonucleoprotein-associated protein B, putative      |
| PF3D7_1010600 | PVVCY_1200980 | 9.200  | 9.291  | 8.637  | 8.349  | eukaryotic translation initiation factor 2 subunit beta, putative   |
| PF3D7_0622800 | PVVCY_1102280 | 8.673  | 8.714  | 8.190  | 7.497  | leucine--tRNA ligase, putative                                      |
| PF3D7_1438500 | PVVCY_1300420 | 6.751  | 6.699  | 6.410  | 5.959  | cleavage and polyadenylation specificity factor subunit 3, putative |
| PF3D7_0416900 | PVVCY_0701870 | 3.948  | 4.544  | 4.396  | 3.520  | conserved Plasmodium protein, unknown function                      |
| PF3D7_1454400 | PVVCY_1301960 | 11.439 | 11.187 | 10.310 | 10.099 | aminopeptidase P, putative                                          |
| PF3D7_1309700 | PVVCY_1400990 | 5.681  | 5.355  | 4.670  | 4.545  | vacuolar protein sorting-associated protein 18, putative            |
| PF3D7_1350100 | PVVCY_1306590 | 7.835  | 7.970  | 8.020  | 7.220  | lysine--tRNA ligase, putative                                       |
| PF3D7_1237100 | PVVCY_1405390 | 5.792  | 5.278  | 4.349  | 4.515  | conserved Plasmodium protein, unknown function                      |
| PF3D7_1453600 | PVVCY_1301880 | 4.803  | 4.708  | 3.736  | 3.141  | RAP protein, putative                                               |
| PF3D7_1354500 | PVVCY_1103220 | 9.071  | 8.833  | 8.196  | 7.643  | adenylosuccinate synthetase, putative                               |
| PF3D7_1353700 | PVVCY_1103140 | 8.099  | 7.818  | 6.963  | 6.685  | reactive oxygen species modulator 1, putative                       |
| PF3D7_0623200 | PVVCY_1102320 | 5.617  | 5.898  | 5.132  | 5.241  | ferredoxin--NADP reductase, putative                                |
| PF3D7_1332900 | PVVCY_1305040 | 7.584  | 7.244  | 6.839  | 6.245  | isoleucine--tRNA ligase, putative                                   |
| PF3D7_1037300 | PVVCY_0502060 | 10.160 | 9.486  | 9.448  | 9.833  | ADP_ATP transporter on adenylate translocase, putative              |
| PF3D7_0810600 | PVVCY_1402880 | 9.217  | 8.475  | 8.421  | 8.272  | ATP-dependent RNA helicase DBP1, putative                           |
| PF3D7_1104000 | PVVCY_0900330 | 7.143  | 7.145  | 6.633  | 6.223  | phenylalanine--tRNA ligase beta subunit, putative                   |
| PF3D7_0303500 | PVVCY_0400270 | 2.701  | 3.599  | 5.529  | 5.254  | spindle pole body protein, putative                                 |
| PF3D7_1451500 | PVVCY_1301680 | 6.929  | 6.882  | 6.869  | 6.942  | pre-mRNA-splicing factor CWF18, putative                            |
| PF3D7_1111200 | PVVCY_0900990 | 6.573  | 6.783  | 6.841  | 6.717  | conserved Plasmodium protein, unknown function                      |
| PF3D7_0813600 | PVVCY_1402570 | 8.026  | 8.373  | 7.424  | 7.358  | translation initiation factor SUI1, putative                        |
| PF3D7_0603300 | PVVCY_0100350 | 8.534  | 7.878  | 6.707  | 7.491  | dihydroorotate dehydrogenase, putative                              |
| PF3D7_1474700 | PVVCY_1300310 | 3.503  | 3.711  | 4.177  | 3.546  | protein kinase, putative                                            |
| PF3D7_0609400 | PVVCY_0100940 | 6.368  | 5.532  | 4.638  | 5.147  | mitochondrial cardiolipin synthase, putative                        |

|               |               |        |        |        |        |                                                                         |
|---------------|---------------|--------|--------|--------|--------|-------------------------------------------------------------------------|
| PF3D7_1241500 | PVVCY_1405710 | 8.208  | 7.000  | 7.448  | 8.971  | conserved Plasmodium protein, unknown function                          |
| PF3D7_1033700 | PVVCY_0501800 | 9.325  | 8.679  | 8.411  | 9.093  | bromodomain protein 1, putative                                         |
| PF3D7_1402100 | PVVCY_1004520 | 5.681  | 5.924  | 5.859  | 5.046  | conserved Plasmodium protein, unknown function                          |
| PF3D7_1423600 | PVVCY_1002470 | 5.880  | 5.463  | 5.375  | 5.839  | calcium-dependent protein kinase, putative                              |
| PF3D7_1143400 | PVVCY_0904170 | 10.110 | 10.237 | 9.816  | 9.442  | translation initiation factor eIF-1A, putative                          |
| PF3D7_1307300 | PVVCY_1400750 | 6.049  | 5.995  | 5.195  | 4.692  | ATP-dependent RNA helicase DBP6, putative                               |
| PF3D7_0606900 | PVVCY_0100680 | 7.879  | 8.285  | 7.048  | 6.917  | glutaredoxin-like protein                                               |
| PF3D7_0409400 | PVVCY_0800730 | 7.159  | 6.829  | 6.422  | 6.070  | DnaJ protein, putative                                                  |
| PF3D7_1352700 | PVVCY_1306830 | 5.765  | 5.491  | 5.775  | 5.474  | conserved Plasmodium protein, unknown function                          |
| PF3D7_0622800 | PVVCY_1102280 | 8.673  | 8.714  | 8.190  | 7.497  | leucine--tRNA ligase, putative                                          |
| PF3D7_1208600 | PVVCY_0600740 | 8.035  | 8.474  | 8.506  | 7.478  | mitochondrial import inner membrane translocase subunit TIM10, putative |
| PF3D7_1305400 | PVVCY_1400560 | 5.272  | 5.547  | 5.295  | 4.421  | AAR2 protein, putative                                                  |
| PF3D7_0409400 | PVVCY_0800730 | 7.159  | 6.829  | 6.422  | 6.070  | DnaJ protein, putative                                                  |
| PF3D7_1234800 | PVVCY_1405150 | 6.820  | 6.606  | 6.767  | 6.287  | splicing factor 3B subunit 3, putative                                  |
| PF3D7_1012500 | PVVCY_1201170 | 8.357  | 8.172  | 7.534  | 6.382  | phosphoglucomutase, putative                                            |
| PF3D7_1347200 | PVVCY_1306320 | 11.644 | 11.283 | 10.856 | 10.332 | nucleoside transporter 1, putative                                      |
| PF3D7_1434700 | PVVCY_0801060 | 8.076  | 8.130  | 7.877  | 7.211  | mitochondrial import inner membrane translocase subunit TIM17, putative |
| PF3D7_0720400 | PVVCY_0601820 | 7.901  | 7.748  | 7.416  | 6.760  | ferrodoxin reductase-like protein, putative                             |
| PF3D7_1213800 | PVVCY_1403160 | 8.385  | 8.314  | 8.111  | 7.302  | proline--tRNA ligase, putative                                          |
| PF3D7_0519600 | PVVCY_1203530 | 4.585  | 4.948  | 5.396  | 5.152  | zinc finger protein, putative                                           |
| PF3D7_1465200 | PVVCY_1303100 | 6.375  | 6.697  | 6.280  | 5.394  | conserved Plasmodium protein, unknown function                          |
| PF3D7_0320300 | PVVCY_1201910 | 9.083  | 9.304  | 9.098  | 7.860  | T-complex protein 1 subunit epsilon, putative                           |
| PF3D7_1421500 | PVVCY_1002670 | 5.981  | 6.144  | 5.469  | 5.591  | mitochondrial import inner membrane translocase subunit TIM8, putative  |
| PF3D7_0512200 | PVVCY_1101260 | 6.988  | 6.961  | 6.447  | 5.870  | glutathione synthetase, putative                                        |
| PF3D7_1120100 | PVVCY_0901820 | 12.200 | 12.252 | 11.592 | 10.575 | phosphoglycerate mutase, putative                                       |
| PF3D7_1452400 | PVVCY_1301770 | 7.311  | 6.866  | 7.125  | 7.085  | conserved Plasmodium protein, unknown function                          |
| PF3D7_1344800 | PVVCY_1306080 | 6.142  | 5.928  | 6.883  | 7.233  | aspartate carbamoyltransferase, putative                                |
| PF3D7_0913200 | PVVCY_0801160 | 9.903  | 10.087 | 9.619  | 9.488  | elongation factor 1-beta, putative                                      |
| PF3D7_1229500 | PVVCY_1404620 | 9.307  | 9.563  | 9.120  | 8.021  | T-complex protein 1 subunit gamma, putative                             |
| PF3D7_1129000 | PVVCY_0902710 | 10.442 | 10.187 | 9.324  | 9.842  | spermidine synthase, putative                                           |
| PF3D7_1414900 | PVVCY_1003310 | 5.675  | 5.507  | 4.358  | 3.659  | ATP-dependent protease, putative                                        |
| PF3D7_1422800 | PVVCY_1002560 | 5.811  | 6.422  | 6.049  | 4.885  | actin-related protein, putative                                         |
| PF3D7_1458400 | PVVCY_1302360 | 3.542  | 4.168  | 7.094  | 7.156  | aminodeoxychorismate lyase, putative                                    |
| PF3D7_0628000 | PVVCY_1102790 | 5.446  | 6.233  | 5.667  | 4.511  | 6-pyruvoyltetrahydropterin synthase, putative                           |
| PF3D7_1329400 | PVVCY_1304710 | 3.411  | 2.510  | 5.532  | 6.302  | AMP deaminase, putative                                                 |
| PF3D7_1365100 | PVVCY_1104200 | 7.836  | 8.254  | 7.767  | 6.204  | mitochondrial ribosomal protein S17 precursor, putative                 |
| PF3D7_0919700 | PVVCY_0801800 | 6.903  | 6.720  | 5.254  | 5.070  | pyridoxal 5'-phosphate dependent enzyme class III, putative             |
| PF3D7_1468900 | PVVCY_1303460 | 6.866  | 6.689  | 6.506  | 6.590  | conserved Plasmodium protein, unknown function                          |

|               |               |        |        |        |       |                                                                                         |
|---------------|---------------|--------|--------|--------|-------|-----------------------------------------------------------------------------------------|
| PF3D7_1325100 | PVVCY_1304290 | 8.727  | 8.564  | 7.716  | 7.634 | phosphoribosylpyrophosphate synthetase, putative                                        |
| PF3D7_0623700 | PVVCY_1102370 | 6.420  | 6.280  | 5.399  | 4.645 | ATP-dependent RNA helicase SUV3, putative                                               |
| PF3D7_1316500 | PVVCY_1401660 | 6.472  | 6.017  | 6.248  | 6.393 | pre-mRNA-processing factor 40, putative                                                 |
| PF3D7_1124700 | PVVCY_0902270 | 7.205  | 7.315  | 6.458  | 6.080 | GrpE protein homolog, mitochondrial, putative                                           |
| PF3D7_0826000 | PVVCY_0700450 | 5.558  | 5.583  | 3.657  | 3.747 | conserved Plasmodium protein, unknown function                                          |
| PF3D7_0506000 | PVVCY_1100650 | 5.454  | 5.663  | 5.418  | 5.775 | conserved Plasmodium protein, unknown function                                          |
| PF3D7_0913200 | PVVCY_0801160 | 9.903  | 10.087 | 9.619  | 9.488 | elongation factor 1-beta, putative                                                      |
| PF3D7_0322100 | PVVCY_1201720 | 6.704  | 6.833  | 6.690  | 5.983 | mRNA-capping enzyme subunit beta, putative                                              |
| PF3D7_1305900 | PVVCY_1400610 | 5.945  | 5.437  | 5.001  | 5.516 | conserved Plasmodium protein, unknown function                                          |
| PF3D7_1442000 | PVVCY_1300760 | 5.807  | 6.804  | 6.569  | 5.702 | ADP-ribosylation factor, putative                                                       |
| PF3D7_0318100 | PVVCY_1000880 | 7.473  | 7.252  | 6.477  | 6.007 | stomatin-like protein                                                                   |
| PF3D7_1129000 | PVVCY_0902710 | 10.442 | 10.187 | 9.324  | 9.842 | spermidine synthase, putative                                                           |
| PF3D7_1356200 | PVVCY_1103370 | 7.749  | 7.786  | 6.984  | 6.757 | mitochondrial import inner membrane translocase subunit TIM23, putative                 |
| PF3D7_1303300 | PVVCY_1400350 | 5.731  | 6.046  | 5.722  | 4.916 | conserved Plasmodium protein, unknown function                                          |
| PF3D7_1453700 | PVVCY_1301890 | 10.879 | 10.769 | 10.238 | 9.592 | co-chaperone p23, putative                                                              |
| PF3D7_0813600 | PVVCY_1402570 | 8.026  | 8.373  | 7.424  | 7.358 | translation initiation factor SUI1, putative                                            |
| PF3D7_1247100 | PVVCY_1406220 | 6.578  | 6.582  | 6.374  | 5.511 | conserved Plasmodium protein, unknown function                                          |
| PF3D7_1426200 | PVVCY_1002330 | 8.185  | 7.974  | 7.061  | 6.456 | protein arginine N-methyltransferase 1, putative                                        |
| PF3D7_1305900 | PVVCY_1400610 | 5.945  | 5.437  | 5.001  | 5.516 | conserved Plasmodium protein, unknown function                                          |
| PF3D7_1118200 | PVVCY_0901640 | 7.386  | 6.806  | 5.649  | 5.830 | heat shock protein 90, putative                                                         |
| PF3D7_1447900 | PVVCY_1301330 | 6.574  | 5.402  | 5.945  | 6.770 | ABC transporter B family member 2, putative<br>multidrug resistance protein 2, putative |
| PF3D7_1111700 | PVVCY_0901030 | 5.139  | 5.111  | 5.286  | 4.933 | conserved Plasmodium protein, unknown function                                          |
| PF3D7_0627500 | PVVCY_1102740 | 10.533 | 11.043 | 10.614 | 9.078 | protein DJ-1, putative                                                                  |
| PF3D7_0319500 | PVVCY_1000750 | 6.597  | 6.526  | 6.548  | 6.401 | RNA-binding protein, putative                                                           |
| PF3D7_0616000 | PVVCY_1203170 | 8.449  | 7.679  | 6.020  | 7.532 | pyridoxal kinase, putative                                                              |
| PF3D7_1243100 | PVVCY_1405860 | 4.650  | 4.860  | 4.800  | 5.867 | zinc finger protein, putative                                                           |
| PF3D7_1317400 | PVVCY_1401750 | 7.773  | 8.558  | 8.587  | 7.242 | conserved Plasmodium protein, unknown function                                          |
| PF3D7_0212700 | PVVCY_0301050 | 5.248  | 5.900  | 5.605  | 4.667 | SRR1-like protein                                                                       |
| PF3D7_0523100 | PVVCY_1203860 | 7.226  | 7.756  | 8.085  | 7.236 | mitochondrial processing peptidase alpha subunit, putative                              |
| PF3D7_1404100 | PVVCY_1004340 | 7.438  | 7.907  | 8.181  | 7.725 | cytochrome c, putative                                                                  |
| PF3D7_1225700 | PVVCY_1404270 | 6.474  | 6.025  | 5.471  | 5.333 | VAC14 domain-containing protein, putative                                               |
| PF3D7_0506000 | PVVCY_1100650 | 5.454  | 5.663  | 5.418  | 5.775 | conserved Plasmodium protein, unknown function                                          |
| PF3D7_1235500 | PVVCY_1405220 | 6.230  | 6.100  | 6.342  | 6.062 | mRNA methyltransferase, putative                                                        |
| PF3D7_0306200 | PVVCY_0400520 | 7.426  | 7.509  | 6.868  | 6.068 | activator of Hsp90 ATPase, putative                                                     |
| PF3D7_1368600 | PVVCY_1104550 | 6.805  | 8.245  | 8.205  | 6.920 | mitochondrial import inner membrane translocase subunit TIM9, putative                  |
| PF3D7_1421600 | PVVCY_1002660 | 5.337  | 5.409  | 4.789  | 4.427 | conserved Plasmodium protein, unknown function                                          |

|               |               |        |        |        |        |                                                                                  |
|---------------|---------------|--------|--------|--------|--------|----------------------------------------------------------------------------------|
| PF3D7_0924100 | PVVCY_0802250 | 6.508  | 6.346  | 5.849  | 6.162  | conserved Plasmodium protein, unknown function                                   |
| PF3D7_1337000 | PVVCY_1305350 | 4.603  | 5.233  | 4.899  | 3.615  | endopeptidase, putative                                                          |
| PF3D7_0212200 | PVVCY_0301000 | 5.913  | 6.800  | 7.031  | 5.653  | mitochondrial ribosomal protein L12 precursor, putative                          |
| PF3D7_0110500 | PVVCY_0200300 | 6.567  | 6.479  | 6.600  | 6.513  | bromodomain protein, putative                                                    |
| PF3D7_1355900 | PVVCY_1103340 | 6.573  | 6.863  | 5.738  | 5.589  | RWD domain-containing protein, putative                                          |
| PF3D7_1014700 | PVVCY_1201390 | 6.869  | 7.151  | 7.411  | 6.628  | prohibitin, putative                                                             |
| PF3D7_0829200 | PVVCY_0700140 | 6.866  | 7.318  | 7.322  | 6.497  | prohibitin, putative                                                             |
| PF3D7_0319200 | PVVCY_1000780 | 7.389  | 6.779  | 6.057  | 6.359  | conserved Plasmodium protein, unknown function                                   |
| PF3D7_1011700 | PVVCY_1201090 | 7.692  | 7.782  | 7.644  | 7.312  | DNA repair protein RAD23, putative                                               |
| PF3D7_0628000 | PVVCY_1102790 | 5.446  | 6.233  | 5.667  | 4.511  | 6-pyruvoyltetrahydropterin synthase, putative                                    |
| PF3D7_0717900 | PVVCY_0601590 | 6.042  | 5.921  | 5.891  | 4.967  | thioredoxin-like protein                                                         |
| PF3D7_1036700 | PVVCY_0502010 | 5.688  | 6.467  | 6.246  | 5.098  | phosducin-like protein, putative                                                 |
| PF3D7_1451400 | PVVCY_1301670 | 5.187  | 5.300  | 5.541  | 4.843  | histone deacetylase, putative                                                    |
| PF3D7_1015900 | PVVCY_1201510 | 12.707 | 12.657 | 12.062 | 11.058 | enolase, putative                                                                |
| PF3D7_1459100 | PVVCY_1302430 | 4.842  | 5.289  | 4.131  | 3.099  | GTP-binding protein, putative                                                    |
| PF3D7_1326400 | PVVCY_1304420 | 6.905  | 7.152  | 6.821  | 5.672  | translation initiation factor eIF-2B subunit gamma, putative                     |
| PF3D7_0802000 | PVVCY_1202920 | 10.313 | 9.451  | 7.273  | 8.144  | glutamate dehydrogenase, putative                                                |
| PF3D7_1443200 | PVVCY_1300880 | 4.631  | 4.410  | 4.261  | 3.788  | conserved Plasmodium protein, unknown function                                   |
| PF3D7_0411200 | PVVCY_0601270 | 4.677  | 4.491  | 4.059  | 3.382  | conserved Plasmodium protein, unknown function                                   |
| PF3D7_0810800 | PVVCY_1402860 | 7.016  | 6.916  | 6.159  | 5.406  | hydroxymethyl-dihydropterin pyrophosphokinase-dihydropteroate synthase, putative |
| PF3D7_1004400 | PVVCY_1200330 | 7.494  | 7.267  | 7.782  | 7.695  | RNA-binding protein, putative                                                    |
| PF3D7_1107500 | PVVCY_0900690 | 6.885  | 7.277  | 6.865  | 5.984  | prefoldin, putative                                                              |
| PF3D7_1321700 | PVVCY_1303960 | 7.995  | 7.912  | 7.749  | 7.803  | splicing factor 1, putative                                                      |
| PF3D7_1423200 | PVVCY_1002520 | 8.911  | 8.775  | 8.352  | 8.215  | peptidyl-prolyl cis-trans isomerase, putative                                    |
| PF3D7_1015600 | PVVCY_1201480 | 8.497  | 8.356  | 7.810  | 6.641  | heat shock protein 60, putative                                                  |
| PF3D7_0405700 | PVVCY_0800370 | 2.484  | 1.335  | 2.356  | 2.970  | lysine decarboxylase, putative                                                   |
| PF3D7_1422700 | PVVCY_1002570 | 5.923  | 6.047  | 5.487  | 5.239  | conserved Plasmodium protein, unknown function                                   |
| PF3D7_1360300 | PVVCY_1103770 | 4.379  | 5.462  | 5.709  | 5.047  | conserved Plasmodium protein, unknown function                                   |
| PF3D7_1318300 | PVVCY_1401840 | 2.039  | 1.953  | 4.055  | 4.316  | conserved Plasmodium protein, unknown function                                   |
| PF3D7_1314100 | PVVCY_1401200 | 5.587  | 5.463  | 4.736  | 4.425  | conserved Plasmodium protein, unknown function                                   |
| PF3D7_1215300 | PVVCY_1403310 | 8.651  | 8.993  | 8.055  | 6.944  | 10 kDa chaperonin, putative                                                      |
| PF3D7_1232900 | PVVCY_1404970 | 5.487  | 5.599  | 4.666  | 3.809  | nucleotidyltransferase, putative                                                 |
| PF3D7_1205100 | PVVCY_0600420 | 6.193  | 6.071  | 5.055  | 4.396  | O-phosphoserine-tRNA(Sec) selenium transferase, putative                         |
| PF3D7_1438900 | PVVCY_1300460 | 10.671 | 10.930 | 10.610 | 9.617  | thioredoxin peroxidase 1, putative                                               |
| PF3D7_0730100 | PVVCY_0201390 | 6.348  | 6.677  | 6.262  | 5.058  | tRNA pseudouridine synthase D, putative                                          |
| PF3D7_1449700 | PVVCY_1301500 | 5.199  | 4.816  | 4.453  | 4.742  | exosome complex exonuclease RRP6, putative                                       |
| PF3D7_1318300 | PVVCY_1401840 | 2.039  | 1.953  | 4.055  | 4.316  | conserved Plasmodium protein, unknown function                                   |

|               |               |        |        |        |        |                                                                                   |
|---------------|---------------|--------|--------|--------|--------|-----------------------------------------------------------------------------------|
| PF3D7_0514300 | PVVCY_1101480 | 5.462  | 5.283  | 4.797  | 4.294  | aspartate--tRNA ligase, putative                                                  |
| PF3D7_0810800 | PVVCY_1402860 | 7.016  | 6.916  | 6.159  | 5.406  | hydroxymethyl-dihydropterin pyrophosphokinase- dihydropteroate synthase, putative |
| PF3D7_1106500 | PVVCY_0900590 | 4.936  | 4.652  | 4.102  | 3.729  | conserved Plasmodium protein, unknown function                                    |
| PF3D7_1033300 | PVVCY_0501760 | 8.296  | 8.209  | 8.024  | 8.138  | conserved Plasmodium protein, unknown function                                    |
| PF3D7_1124300 | PVVCY_0902230 | 7.764  | 6.985  | 6.480  | 7.376  | conserved Plasmodium protein, unknown function                                    |
| PF3D7_1231900 | PVVCY_1404870 | 4.136  | 4.160  | 3.479  | 3.081  | conserved Plasmodium protein, unknown function                                    |
| PF3D7_1451000 | PVVCY_1301630 | 6.724  | 6.392  | 6.208  | 6.390  | conserved Plasmodium protein, unknown function                                    |
| PF3D7_1204300 | PVVCY_0600340 | 11.673 | 12.059 | 11.481 | 11.369 | eukaryotic translation initiation factor 5A, putative                             |
| PF3D7_1439200 | PVVCY_1300490 | 0.633  | 0.627  | 1.379  | 1.183  | conserved Plasmodium protein, unknown function                                    |
| PF3D7_0306300 | PVVCY_0400530 | 12.124 | 12.276 | 11.891 | 10.678 | glutaredoxin 1, putative                                                          |
| PF3D7_1232900 | PVVCY_1404970 | 5.487  | 5.599  | 4.666  | 3.809  | nucleotidyltransferase, putative                                                  |
| PF3D7_0608800 | PVVCY_0100880 | 11.587 | 11.192 | 10.563 | 9.948  | ornithine aminotransferase, putative                                              |
| PF3D7_0511000 | PVVCY_1101140 | 10.840 | 11.054 | 10.895 | 10.771 | translationally-controlled tumor protein homolog, putative                        |
| PF3D7_1325000 | PVVCY_1304280 | 8.918  | 9.464  | 8.958  | 7.984  | U6 snRNA-associated Sm-like protein LSm6, putative                                |
| PF3D7_1211600 | PVVCY_0601030 | 5.627  | 5.749  | 5.240  | 5.038  | lysine-specific histone demethylase 1, putative                                   |
| PF3D7_1326300 | PVVCY_1304410 | 7.958  | 7.408  | 7.468  | 7.441  | RNA-binding protein, putative                                                     |
| PF3D7_0211800 | PVVCY_0300960 | 8.378  | 8.732  | 8.662  | 7.883  | asparagine--tRNA ligase, putative                                                 |
| PF3D7_0628700 | PVVCY_1102860 | 5.871  | 5.794  | 5.383  | 4.530  | conserved Plasmodium protein, unknown function                                    |
| PF3D7_0934100 | PVVCY_0803250 | 6.998  | 7.217  | 6.928  | 6.058  | TFIIH basal transcription factor complex helicase XPD subunit, putative           |
| PF3D7_1404000 | PVVCY_1004350 | 4.502  | 5.701  | 4.556  | 3.833  | DNA-directed RNA polymerase II subunit RPB4, putative                             |
| PF3D7_0932300 | PVVCY_0803070 | 8.902  | 9.223  | 8.779  | 7.559  | M18 aspartyl aminopeptidase, putative                                             |
| PF3D7_1225700 | PVVCY_1404270 | 6.474  | 6.025  | 5.471  | 5.333  | VAC14 domain-containing protein, putative                                         |
| PF3D7_0622700 | PVVCY_1102270 | 6.180  | 6.298  | 5.786  | 5.273  | conserved Plasmodium protein, unknown function                                    |
| PF3D7_1435400 | PVVCY_0800990 | 7.808  | 7.961  | 7.601  | 7.171  | ER membrane protein complex subunit 4, putative                                   |
| PF3D7_0602500 | PVVCY_0100270 | 5.919  | 6.469  | 6.466  | 5.274  | geranylgeranyltransferase, putative                                               |
| PF3D7_0417300 | PVVCY_0701910 | 5.582  | 5.268  | 4.908  | 5.319  | LETM1-like protein, putative                                                      |
| PF3D7_1129800 | PVVCY_0902860 | 4.345  | 4.955  | 4.391  | 4.266  | conserved Plasmodium protein, unknown function                                    |
| PF3D7_1302900 | PVVCY_1400310 | 5.953  | 5.438  | 4.812  | 4.143  | conserved Plasmodium protein, unknown function                                    |
| PF3D7_1032300 | PVVCY_0501660 | 4.367  | 4.514  | 4.123  | 3.149  | conserved Plasmodium protein, unknown function                                    |
| PF3D7_0523700 | PVVCY_1203920 | 3.910  | 3.995  | 2.978  | 2.373  | conserved Plasmodium protein, unknown function                                    |
| PF3D7_1225700 | PVVCY_1404270 | 6.474  | 6.025  | 5.471  | 5.333  | VAC14 domain-containing protein, putative                                         |
| PF3D7_0934000 | PVVCY_0803240 | 5.104  | 4.733  | 3.984  | 4.001  | histidine--tRNA ligase, putative                                                  |
| PF3D7_0616700 | PVVCY_1101710 | 4.279  | 4.699  | 4.608  | 4.082  | ras GTPase, putative                                                              |
| PF3D7_1470100 | PVVCY_1303580 | 3.955  | 4.182  | 3.928  | 3.185  | conserved Plasmodium protein, unknown function                                    |



|               |               |        |        |        |        |                                                                         |
|---------------|---------------|--------|--------|--------|--------|-------------------------------------------------------------------------|
| PF3D7_1471900 | PVVCY_1303760 | 3.780  | 3.940  | 3.793  | 3.514  | conserved Plasmodium protein, unknown function                          |
| PF3D7_1036700 | PVVCY_0502010 | 5.688  | 6.467  | 6.246  | 5.098  | phosducin-like protein, putative                                        |
| PF3D7_0913300 | PVVCY_0801170 | 7.321  | 7.359  | 6.999  | 6.236  | conserved Plasmodium protein, unknown function                          |
| PF3D7_0512000 | PVVCY_1101240 | 8.262  | 8.887  | 8.789  | 7.755  | prefoldin subunit 6, putative                                           |
| PF3D7_1230600 | PVVCY_1404740 | 5.554  | 5.656  | 5.366  | 4.754  | sun-family protein, putative                                            |
| PF3D7_1310900 | PVVCY_1401110 | 7.025  | 7.379  | 7.110  | 6.393  | mitochondrial ribosomal protein S15 precursor, putative                 |
| PF3D7_1363200 | PVVCY_1104030 | 4.699  | 5.699  | 5.517  | 4.352  | bifunctional polynucleotide phosphatase/kinase, putative                |
| PF3D7_1412700 | PVVCY_1003530 | 5.849  | 5.970  | 6.024  | 5.291  | AAA family ATPase, putative                                             |
| PF3D7_0303800 | PVVCY_0400300 | 2.319  | 3.767  | 5.127  | 4.527  | IBR domain protein, putative                                            |
| PF3D7_1460400 | PVVCY_1302560 | 7.364  | 8.041  | 7.609  | 6.863  | ubiquitin carboxyl-terminal hydrolase isozyme L3, putative              |
| PF3D7_0417300 | PVVCY_0701910 | 5.582  | 5.268  | 4.908  | 5.319  | LETM1-like protein, putative                                            |
| PF3D7_0708000 | PVVCY_1000690 | 3.894  | 4.644  | 4.168  | 3.151  | cytoskeleton associated protein, putative                               |
| PF3D7_1009600 | PVVCY_1200870 | 3.149  | 1.488  | 4.052  | 5.147  | protein phosphatase, putative                                           |
| PF3D7_1428700 | PVVCY_1002090 | 6.160  | 6.318  | 5.932  | 5.626  | conserved Plasmodium protein, unknown function                          |
| PF3D7_0808000 | PVVCY_1202360 | 3.402  | 3.238  | 2.688  | 2.329  | conserved Plasmodium protein, unknown function                          |
| PF3D7_0934000 | PVVCY_0803240 | 5.104  | 4.733  | 3.984  | 4.001  | histidine--tRNA ligase, putative                                        |
| PF3D7_1324900 | PVVCY_1304270 | 13.000 | 13.085 | 12.435 | 11.343 | L-lactate dehydrogenase, putative                                       |
| PF3D7_1248100 | PVVCY_1406310 | 6.747  | 6.221  | 5.342  | 5.972  | methyltransferase, putative                                             |
| PF3D7_1317300 | PVVCY_1401740 | 6.570  | 7.167  | 6.884  | 6.095  | conserved Plasmodium protein, unknown function                          |
| PF3D7_1020500 | PVVCY_0500520 | 4.173  | 4.065  | 3.929  | 3.131  | ribosomal silencing factor RsfS, putative                               |
| PF3D7_0323100 | PVVCY_1201620 | 5.647  | 6.180  | 5.817  | 5.785  | conserved Plasmodium protein, unknown function                          |
| PF3D7_1006600 | PVVCY_1200550 | 6.310  | 7.127  | 6.585  | 5.840  | phosducin-like protein, putative                                        |
| PF3D7_1037100 | PVVCY_0502040 | 5.713  | 6.194  | 5.935  | 4.856  | pyruvate kinase 2, putative                                             |
| PF3D7_0407400 | PVVCY_0800530 | 5.141  | 6.031  | 6.148  | 5.373  | conserved Plasmodium protein, unknown function                          |
| PF3D7_1409800 | PVVCY_1003810 | 8.872  | 9.261  | 9.447  | 8.437  | CUGBP Elav-like family member 2, putative                               |
| PF3D7_1462800 | PVVCY_1302790 | 13.100 | 13.025 | 12.333 | 11.365 | glyceraldehyde-3-phosphate dehydrogenase, putative                      |
| PF3D7_0811200 | PVVCY_1402820 | 7.424  | 7.256  | 7.148  | 6.494  | ER membrane protein complex subunit 1, putative                         |
| PF3D7_0422000 | PVVCY_0502310 | 3.556  | 4.728  | 5.623  | 4.910  | steroid dehydrogenase, putative                                         |
| PF3D7_0103200 | PVVCY_0200970 | 6.380  | 6.142  | 5.657  | 6.468  | nucleoside transporter 4, putative                                      |
| PF3D7_0922500 | PVVCY_0802090 | 12.061 | 11.851 | 11.114 | 10.246 | phosphoglycerate kinase, putative                                       |
| PF3D7_0513400 | PVVCY_1101390 | 5.388  | 5.350  | 4.432  | 3.992  | GTP-binding protein, putative                                           |
| PF3D7_1012400 | PVVCY_1201160 | 15.059 | 15.035 | 13.572 | 12.668 | hypoxanthine-guanine phosphoribosyltransferase, putative                |
| PF3D7_1439900 | PVVCY_1300560 | 10.860 | 10.767 | 9.907  | 9.163  | triosephosphate isomerase, putative                                     |
| PF3D7_0934100 | PVVCY_0803250 | 6.998  | 7.217  | 6.928  | 6.058  | TFIIH basal transcription factor complex helicase XPD subunit, putative |
| PF3D7_0908900 | PVVCY_1001190 | 4.339  | 4.228  | 3.752  | 3.103  | conserved Plasmodium protein, unknown function                          |
| PF3D7_0512800 | PVVCY_1101330 | 5.345  | 5.425  | 4.530  | 3.715  | conserved Plasmodium protein, unknown function                          |

|               |               |        |        |        |        |                                                                         |
|---------------|---------------|--------|--------|--------|--------|-------------------------------------------------------------------------|
| PF3D7_0619500 | PVVCY_1101950 | 6.437  | 6.231  | 5.811  | 5.592  | acyl-CoA synthetase, putative                                           |
| PF3D7_1020500 | PVVCY_0500520 | 4.173  | 4.065  | 3.929  | 3.131  | ribosomal silencing factor RsfS, putative                               |
| PF3D7_1434800 | PVVCY_0801050 | 9.288  | 9.332  | 8.663  | 7.688  | mitochondrial acidic protein MAM33, putative                            |
| PF3D7_1311200 | PVVCY_1401140 | 6.825  | 7.016  | 6.842  | 6.200  | alternative splicing regulator, putative                                |
| PF3D7_1026200 | PVVCY_0501090 | 6.147  | 6.532  | 5.260  | 4.147  | conserved Plasmodium protein, unknown function                          |
| PF3D7_1132900 | PVVCY_0903160 | 5.268  | 5.543  | 5.266  | 4.783  | glycine cleavage system H protein, putative                             |
| PF3D7_1444900 | PVVCY_1301040 | 6.218  | 6.581  | 5.966  | 4.993  | conserved Plasmodium protein, unknown function                          |
| PF3D7_1439100 | PVVCY_1300480 | 5.261  | 4.934  | 4.673  | 3.696  | DEAD DEAH helicase, putative                                            |
| PF3D7_1342400 | PVVCY_1305860 | 8.793  | 8.833  | 8.591  | 7.932  | casein kinase II beta chain, putative                                   |
| PF3D7_0626800 | PVVCY_1102680 | 11.956 | 11.636 | 11.132 | 10.623 | pyruvate kinase, putative                                               |
| PF3D7_1456200 | PVVCY_1302140 | 4.814  | 4.890  | 3.760  | 2.585  | conserved Plasmodium protein, unknown function                          |
| PF3D7_1333000 | PVVCY_1305050 | 7.105  | 7.341  | 6.732  | 6.231  | 20 kDa chaperonin, putative                                             |
| PF3D7_0621700 | PVVCY_1102170 | 5.038  | 5.064  | 3.949  | 3.487  | conserved Plasmodium protein, unknown function                          |
| PF3D7_1212200 | PVVCY_1403020 | 3.793  | 3.803  | 3.183  | 2.529  | conserved Plasmodium protein, unknown function                          |
| PF3D7_1355500 | PVVCY_1103310 | 7.649  | 7.731  | 6.864  | 6.672  | serine threonine protein phosphatase 5, putative                        |
| PF3D7_0530400 | PVVCY_1204580 | 3.649  | 3.493  | 3.109  | 2.298  | conserved Plasmodium protein, unknown function                          |
| PF3D7_0518100 | PVVCY_1203380 | 5.469  | 5.477  | 5.919  | 5.146  | RAP protein, putative                                                   |
| PF3D7_1315200 | PVVCY_1401530 | 4.881  | 4.829  | 4.148  | 3.834  | conserved Plasmodium protein, unknown function                          |
| PF3D7_0626800 | PVVCY_1102680 | 11.956 | 11.636 | 11.132 | 10.623 | pyruvate kinase, putative                                               |
| PF3D7_1235400 | PVVCY_1405210 | 3.955  | 4.249  | 4.094  | 3.488  | tetQ family GTPase, putative                                            |
| PF3D7_0323600 | PVVCY_1201570 | 6.260  | 6.673  | 6.332  | 5.819  | conserved Plasmodium protein, unknown function                          |
| PF3D7_0317800 | PVVCY_1000910 | 6.947  | 6.827  | 6.383  | 5.673  | 26S proteasome non-ATPase regulatory subunit 9, putative                |
| PF3D7_1440800 | PVVCY_1300640 | 5.422  | 5.599  | 5.847  | 5.293  | major facilitator superfamily domain-containing protein, putative       |
| PF3D7_0934100 | PVVCY_0803250 | 6.998  | 7.217  | 6.928  | 6.058  | TFIIH basal transcription factor complex helicase XPD subunit, putative |
| PF3D7_0817000 | PVVCY_0701360 | 5.012  | 6.047  | 5.957  | 5.136  | NEDD8-activating enzyme E1 catalytic subunit, putative                  |
| PF3D7_0213500 | PVVCY_0301130 | 4.985  | 5.528  | 5.035  | 4.129  | tetratricopeptide repeat protein, putative                              |
| PF3D7_0916200 | PVVCY_0801460 | 6.660  | 6.279  | 5.342  | 5.590  | conserved Plasmodium protein, unknown function                          |
| PF3D7_0915300 | PVVCY_0801370 | 5.141  | 5.082  | 4.016  | 3.378  | conserved Plasmodium protein, unknown function                          |
| PF3D7_1142000 | PVVCY_0904040 | 4.355  | 4.581  | 4.251  | 3.088  | conserved Plasmodium protein, unknown function                          |
| PF3D7_1337200 | PVVCY_1305370 | 6.169  | 6.510  | 5.987  | 5.035  | 1-deoxy-D-xylulose 5-phosphate synthase, putative                       |
| PF3D7_0934100 | PVVCY_0803250 | 6.998  | 7.217  | 6.928  | 6.058  | TFIIH basal transcription factor complex helicase XPD subunit, putative |
| PF3D7_1345800 | PVVCY_1306180 | 7.173  | 7.093  | 6.661  | 6.152  | conserved Plasmodium protein, unknown function                          |
| PF3D7_0812400 | PVVCY_1402690 | 8.881  | 8.920  | 9.590  | 9.048  | karyopherin alpha, putative                                             |
| PF3D7_0608000 | PVVCY_0100790 | 5.793  | 6.267  | 5.925  | 4.746  | diphthine methyltransferase, putative                                   |
| PF3D7_1439900 | PVVCY_1300560 | 10.860 | 10.767 | 9.907  | 9.163  | triosephosphate isomerase, putative                                     |

|               |               |        |        |        |        |                                                                                                   |
|---------------|---------------|--------|--------|--------|--------|---------------------------------------------------------------------------------------------------|
| PF3D7_1128100 | PVVCY_0902630 | 7.173  | 7.486  | 7.099  | 6.537  | prefoldin subunit 5, putative                                                                     |
| PF3D7_1227100 | PVVCY_1404400 | 6.449  | 6.578  | 5.434  | 4.470  | ATP-dependent RNA helicase, putative                                                              |
| PF3D7_1365500 | PVVCY_1104240 | 6.484  | 6.755  | 6.535  | 6.106  | glycine cleavage system T protein, putative<br>aminomethyltransferase, mitochondrial,<br>putative |
| PF3D7_1313400 | PVVCY_1401270 | 6.510  | 6.726  | 5.952  | 5.299  | DEAD box helicase, putative                                                                       |
| PF3D7_0311600 | PVVCY_0401040 | 6.019  | 6.351  | 5.538  | 4.717  | dolichyl-diphosphooligosaccharide--protein<br>glycosyltransferase subunit 1, putative             |
| PF3D7_1430300 | PVVCY_1001920 | 4.836  | 4.851  | 4.882  | 3.709  | acid phosphatase, putative                                                                        |
| PF3D7_0415600 | PVVCY_0701740 | 6.131  | 6.509  | 5.543  | 4.671  | GTP:AMP phosphotransferase, putative                                                              |
| PF3D7_1316900 | PVVCY_1401700 | 6.276  | 6.165  | 6.396  | 6.506  | conserved Plasmodium protein, unknown<br>function                                                 |
| PF3D7_0906000 | PVVCY_0401640 | 5.524  | 5.364  | 5.549  | 5.505  | exoribonuclease II, putative                                                                      |
| PF3D7_1141700 | PVVCY_0904010 | 5.965  | 6.806  | 6.824  | 5.902  | OTU domain-containing protein, putative                                                           |
| PF3D7_1209800 | PVVCY_0600850 | 5.920  | 7.005  | 6.522  | 6.027  | ATP synthase mitochondrial F1 complex<br>assembly factor 1, putative                              |
| PF3D7_0711500 | PVVCY_1202300 | 6.209  | 6.061  | 7.078  | 7.313  | regulator of chromosome condensation,<br>putative                                                 |
| PF3D7_0917100 | PVVCY_0801550 | 4.486  | 5.044  | 5.023  | 4.339  | N-glycosylase_DNA lyase, putative                                                                 |
| PF3D7_1320500 | PVVCY_1402030 | 7.545  | 7.668  | 7.604  | 7.367  | SNARE protein, putative                                                                           |
| PF3D7_1341900 | PVVCY_1305810 | 9.297  | 9.016  | 8.224  | 7.972  | V-type proton ATPase subunit D, putative                                                          |
| PF3D7_0502700 | PVVCY_1100330 | 3.516  | 4.135  | 3.225  | 2.555  | conserved Plasmodium protein, unknown<br>function                                                 |
| PF3D7_1017800 | PVVCY_0500250 | 4.593  | 4.646  | 4.093  | 3.171  | conserved Plasmodium protein, unknown<br>function                                                 |
| PF3D7_0827100 | PVVCY_0700350 | 5.635  | 5.584  | 5.515  | 5.360  | translation initiation factor IF-2, putative                                                      |
| PF3D7_0512000 | PVVCY_1101240 | 8.262  | 8.887  | 8.789  | 7.755  | prefoldin subunit 6, putative                                                                     |
| PF3D7_1470700 | PVVCY_1303640 | 6.042  | 6.008  | 5.345  | 4.839  | conserved Plasmodium protein, unknown<br>function                                                 |
| PF3D7_1007000 | PVVCY_1200600 | 5.816  | 5.743  | 6.954  | 7.076  | conserved membrane protein, unknown<br>function                                                   |
| PF3D7_0828100 | PVVCY_0700250 | 3.892  | 4.496  | 3.497  | 2.326  | conserved Plasmodium protein, unknown<br>function                                                 |
| PF3D7_1007700 | PVVCY_1200670 | 8.016  | 7.170  | 7.718  | 7.853  | transcription factor with AP2 domain(s),<br>putative                                              |
| PF3D7_1130900 | PVVCY_0902970 | 4.071  | 4.290  | 3.749  | 2.882  | conserved Plasmodium protein, unknown<br>function                                                 |
| PF3D7_1343600 | PVVCY_1305970 | 5.104  | 5.415  | 5.094  | 4.343  | UDP-N-acetylglucosamine<br>pyrophosphorylase, putative                                            |
| PF3D7_0520200 | PVVCY_1203590 | 5.470  | 5.532  | 5.310  | 4.732  | conserved Plasmodium protein, unknown<br>function                                                 |
| PF3D7_1324900 | PVVCY_1304270 | 13.000 | 13.085 | 12.435 | 11.343 | L-lactate dehydrogenase, putative                                                                 |
| PF3D7_0313100 | PVVCY_0401190 | 6.804  | 6.793  | 7.091  | 6.608  | ubiquitin-protein ligase, putative                                                                |
| PF3D7_0322000 | PVVCY_1201730 | 12.014 | 12.375 | 11.600 | 10.485 | peptidyl-prolyl cis-trans isomerase, putative                                                     |
| PF3D7_0621700 | PVVCY_1102170 | 5.038  | 5.064  | 3.949  | 3.487  | conserved Plasmodium protein, unknown<br>function                                                 |
| PF3D7_1333500 | PVVCY_1305090 | 6.048  | 6.607  | 5.515  | 4.352  | conserved Plasmodium protein, unknown<br>function                                                 |
| PF3D7_1242200 | PVVCY_1405770 | 7.120  | 6.938  | 6.751  | 6.450  | queuine tRNA-ribosyltransferase, putative                                                         |
| PF3D7_1250900 | PVVCY_1406590 | 6.116  | 5.570  | 5.607  | 6.302  | conserved Plasmodium protein, unknown<br>function                                                 |
| PF3D7_0509600 | PVVCY_1101010 | 6.559  | 6.594  | 5.999  | 4.877  | asparagine--tRNA ligase, putative                                                                 |
| PF3D7_0526000 | PVVCY_1204150 | 3.023  | 3.818  | 2.298  | 1.693  | RAP protein, putative                                                                             |
| PF3D7_1362300 | PVVCY_1103940 | 6.927  | 6.552  | 6.818  | 6.808  | conserved protein, unknown function                                                               |

|               |               |        |        |        |        |                                                     |
|---------------|---------------|--------|--------|--------|--------|-----------------------------------------------------|
| PF3D7_1009600 | PVVCY_1200870 | 3.149  | 1.488  | 4.052  | 5.147  | protein phosphatase, putative                       |
| PF3D7_0916200 | PVVCY_0801460 | 6.660  | 6.279  | 5.342  | 5.590  | conserved Plasmodium protein, unknown function      |
| PF3D7_1368300 | PVVCY_1104520 | 3.592  | 4.769  | 6.152  | 6.686  | conserved Plasmodium protein, unknown function      |
| PF3D7_0724200 | PVVCY_0602200 | 7.060  | 7.030  | 6.202  | 6.231  | type 2A phosphatase-associated protein 42, putative |
| PF3D7_0710500 | PVVCY_1202200 | 6.353  | 6.522  | 6.703  | 5.828  | conserved Plasmodium protein, unknown function      |
| PF3D7_0906000 | PVVCY_0401640 | 5.524  | 5.364  | 5.549  | 5.505  | exoribonuclease II, putative                        |
| PF3D7_1214200 | PVVCY_1403200 | 6.464  | 6.561  | 4.990  | 3.947  | histone-lysine N-methyltransferase, putative        |
| PF3D7_1326100 | PVVCY_1304380 | 5.557  | 6.462  | 6.090  | 5.970  | WD repeat-containing protein, putative              |
| PF3D7_0727800 | PVVCY_0201160 | 6.301  | 6.557  | 6.609  | 5.915  | cation transporting ATPase, putative                |
| PF3D7_0934000 | PVVCY_0803240 | 5.104  | 4.733  | 3.984  | 4.001  | histidine--tRNA ligase, putative                    |
| PF3D7_1122000 | PVVCY_0902000 | 5.307  | 5.611  | 4.268  | 3.338  | conserved Plasmodium protein, unknown function      |
| PF3D7_0824500 | PVVCY_0700600 | 5.633  | 5.462  | 5.239  | 4.945  | conserved Plasmodium protein, unknown function      |
| PF3D7_1324900 | PVVCY_1304270 | 13.000 | 13.085 | 12.435 | 11.343 | L-lactate dehydrogenase, putative                   |
| PF3D7_1363300 | PVVCY_1104040 | 4.488  | 5.167  | 5.121  | 3.771  | 50S ribosomal protein L9, mitochondrial, putative   |
| PF3D7_1137400 | PVVCY_0903590 | 5.760  | 6.067  | 5.722  | 4.743  | UVB-resistance protein UVR8 homologue, putative     |
| PF3D7_1324900 | PVVCY_1304270 | 13.000 | 13.085 | 12.435 | 11.343 | L-lactate dehydrogenase, putative                   |
| PF3D7_0512100 | PVVCY_1101250 | 6.313  | 7.296  | 6.819  | 5.442  | conserved Plasmodium protein, unknown function      |
| PF3D7_1320400 | PVVCY_1402020 | 5.918  | 6.210  | 4.800  | 5.121  | microsomal signal peptidase, putative               |
| PF3D7_0105200 | PVVCY_0200790 | 6.009  | 6.454  | 5.316  | 4.567  | RAP protein, putative                               |
| PF3D7_1226400 | PVVCY_1404330 | 4.125  | 4.786  | 5.101  | 4.496  | conserved Plasmodium protein, unknown function      |
| PF3D7_0824400 | PVVCY_0700610 | 6.093  | 5.635  | 4.687  | 5.429  | nucleoside transporter 2, putative                  |
| PF3D7_0906000 | PVVCY_0401640 | 5.524  | 5.364  | 5.549  | 5.505  | exoribonuclease II, putative                        |
| PF3D7_1128100 | PVVCY_0902630 | 7.173  | 7.486  | 7.099  | 6.537  | prefoldin subunit 5, putative                       |
| PF3D7_1324900 | PVVCY_1304270 | 13.000 | 13.085 | 12.435 | 11.343 | L-lactate dehydrogenase, putative                   |
| PF3D7_1441400 | PVVCY_1300700 | 6.023  | 7.017  | 8.342  | 8.082  | FACT complex subunit SSRP1, putative                |
| PF3D7_0212800 | PVVCY_0301060 | 4.931  | 4.986  | 4.880  | 3.885  | multidrug efflux pump, putative                     |
| PF3D7_0925400 | PVVCY_0802370 | 4.282  | 5.727  | 6.366  | 5.234  | protein phosphatase-beta, putative                  |
| PF3D7_1324900 | PVVCY_1304270 | 13.000 | 13.085 | 12.435 | 11.343 | L-lactate dehydrogenase, putative                   |
| PF3D7_0615900 | PVVCY_1203160 | 2.101  | 3.397  | 4.396  | 3.820  | conserved Plasmodium protein, unknown function      |
| PF3D7_1324900 | PVVCY_1304270 | 13.000 | 13.085 | 12.435 | 11.343 | L-lactate dehydrogenase, putative                   |
| PF3D7_0801700 | PVVCY_1202950 | 5.705  | 6.506  | 6.432  | 6.167  | sentrin-specific protease 2, putative               |
| PF3D7_0513300 | PVVCY_1101380 | 13.959 | 14.051 | 12.927 | 11.850 | purine nucleoside phosphorylase, putative           |
| PF3D7_0801700 | PVVCY_1202950 | 5.705  | 6.506  | 6.432  | 6.167  | sentrin-specific protease 2, putative               |
| PF3D7_0529700 | PVVCY_1204510 | 3.633  | 3.611  | 2.648  | 2.275  | conserved Plasmodium protein, unknown function      |
| PF3D7_0828200 | PVVCY_0700240 | 6.124  | 6.034  | 5.170  | 4.641  | leucine--tRNA ligase, putative                      |
| PF3D7_0411100 | PVVCY_0601260 | 5.812  | 6.778  | 6.361  | 5.883  | conserved Plasmodium protein, unknown function      |
| PF3D7_0723700 | PVVCY_0602150 | 7.110  | 6.549  | 5.590  | 5.659  | metallo-hydrolase oxidoreductase, putative          |
| PF3D7_1315900 | PVVCY_1401600 | 7.260  | 6.868  | 6.356  | 6.571  | exportin-T, putative                                |

|               |               |        |        |        |        |                                                                         |
|---------------|---------------|--------|--------|--------|--------|-------------------------------------------------------------------------|
| PF3D7_1003200 | PVVCY_1200220 | 6.241  | 6.977  | 6.634  | 5.442  | ribosome-binding factor A, putative                                     |
| PF3D7_0629400 | PVVCY_1102930 | 8.669  | 8.126  | 7.045  | 7.014  | RNA-binding protein, putative                                           |
| PF3D7_0718700 | PVVCY_0601660 | 4.297  | 4.975  | 4.106  | 2.826  | conserved Plasmodium protein, unknown function                          |
| PF3D7_0509300 | PVVCY_1100980 | 6.568  | 6.913  | 6.951  | 6.650  | conserved Plasmodium protein, unknown function                          |
| PF3D7_0627400 | PVVCY_1102730 | 5.360  | 5.623  | 6.003  | 5.285  | mitochondrial import inner membrane translocase subunit TIM22, putative |
| PF3D7_1468800 | PVVCY_1303450 | 7.922  | 7.661  | 7.454  | 7.396  | splicing factor U2AF large subunit, putative                            |
| PF3D7_1351100 | PVVCY_1306690 | 8.368  | 8.446  | 7.992  | 7.506  | conserved protein, unknown function                                     |
| PF3D7_0816600 | PVVCY_0701400 | 6.690  | 6.632  | 6.636  | 5.914  | chaperone protein ClpB1, putative                                       |
| PF3D7_1352800 | PVVCY_1306840 | 6.407  | 6.806  | 6.832  | 5.666  | vacuolar fusion protein MON1, putative                                  |
| PF3D7_1249900 | PVVCY_1406490 | 5.730  | 5.929  | 5.330  | 5.273  | apicoplast dimethyladenosine synthase, putative                         |
| PF3D7_1324900 | PVVCY_1304270 | 13.000 | 13.085 | 12.435 | 11.343 | L-lactate dehydrogenase, putative                                       |
| PF3D7_0602400 | PVVCY_0100260 | 5.578  | 6.060  | 6.184  | 4.904  | elongation factor G, putative                                           |
| PF3D7_1245400 | PVVCY_1406070 | 4.983  | 5.909  | 5.525  | 4.300  | mitochondrial ribosomal protein L3 precursor, putative                  |
| PF3D7_0508300 | PVVCY_1100880 | 7.198  | 6.747  | 6.743  | 7.711  | triose phosphate transporter, putative                                  |
| PF3D7_0502900 | PVVCY_1100350 | 8.369  | 8.990  | 8.436  | 7.934  | zinc binding protein, putative                                          |
| PF3D7_1313400 | PVVCY_1401270 | 6.510  | 6.726  | 5.952  | 5.299  | DEAD box helicase, putative                                             |
| PF3D7_0611900 | PVVCY_0101160 | 6.461  | 7.158  | 6.782  | 6.241  | Ism12, putative                                                         |
| PF3D7_1416800 | PVVCY_1003120 | 6.468  | 6.396  | 6.358  | 5.722  | lysine-tRNA ligase, putative                                            |
| PF3D7_1454600 | PVVCY_1301980 | 4.979  | 6.137  | 6.152  | 4.831  | mitochondrial ribosomal protein S11 precursor, putative                 |
| PF3D7_1320400 | PVVCY_1402020 | 5.918  | 6.210  | 4.800  | 5.121  | microsomal signal peptidase, putative                                   |
| PF3D7_0922800 | PVVCY_0802120 | 3.582  | 3.603  | 3.005  | 2.525  | conserved Plasmodium protein, unknown function                          |
| PF3D7_1024000 | PVVCY_0500870 | 4.030  | 4.718  | 5.283  | 5.120  | conserved Plasmodium protein, unknown function                          |
| PF3D7_1224000 | PVVCY_1404100 | 6.339  | 6.859  | 5.929  | 5.094  | GTP cyclohydrolase I, putative                                          |
| PF3D7_1474300 | PVVCY_1300350 | 3.098  | 3.976  | 5.017  | 5.043  | DNA repair metallo-beta-lactamase protein, putative                     |
| PF3D7_0405600 | PVVCY_0800360 | 5.866  | 6.049  | 5.920  | 5.276  | conserved Plasmodium membrane protein, unknown function                 |
| PF3D7_1106800 | PVVCY_0900620 | 5.972  | 6.187  | 5.662  | 4.800  | protein kinase, putative                                                |
| PF3D7_0614800 | PVVCY_1203050 | 4.965  | 4.413  | 4.827  | 5.285  | endonuclease III homologue, putative                                    |
| PF3D7_0815000 | PVVCY_1402440 | 3.893  | 4.628  | 3.826  | 3.157  | selenoprotein, putative                                                 |
| PF3D7_1461000 | PVVCY_1302620 | 0.655  | 0.678  | 0.964  | 1.256  | conserved Plasmodium protein, unknown function                          |
| PF3D7_0824100 | PVVCY_0700640 | 5.280  | 5.370  | 4.324  | 3.582  | exonuclease, putative                                                   |
| PF3D7_0810200 | PVVCY_1402920 | 5.831  | 5.794  | 5.406  | 4.778  | ABC1 family, putative                                                   |
| PF3D7_1452700 | PVVCY_1301800 | 6.642  | 7.157  | 6.967  | 5.709  | U1 snRNA associated protein, putative                                   |
| PF3D7_1006400 | PVVCY_1200530 | 3.820  | 3.787  | 3.243  | 2.533  | conserved Plasmodium protein, unknown function                          |
| PF3D7_0503900 | PVVCY_1100440 | 5.203  | 5.596  | 5.192  | 4.746  | conserved Plasmodium protein, unknown function                          |
| PF3D7_1315800 | PVVCY_1401590 | 5.968  | 6.051  | 5.848  | 5.527  | transcription factor MYB1, putative                                     |
| PF3D7_1360800 | PVVCY_1103810 | 7.819  | 8.227  | 8.267  | 7.302  | falcilysin, putative                                                    |
| PF3D7_0808000 | PVVCY_1202360 | 3.402  | 3.238  | 2.688  | 2.329  | conserved Plasmodium protein, unknown function                          |

|               |               |       |       |        |       |                                                                |
|---------------|---------------|-------|-------|--------|-------|----------------------------------------------------------------|
| PF3D7_0616300 | PVVCY_1101670 | 6.730 | 6.936 | 7.046  | 6.947 | conserved Plasmodium protein, unknown function                 |
| PF3D7_0502700 | PVVCY_1100330 | 3.516 | 4.135 | 3.225  | 2.555 | conserved Plasmodium protein, unknown function                 |
| PF3D7_0112000 | PVVCY_0200160 | 6.040 | 5.984 | 5.249  | 4.605 | TatD-like deoxyribonuclease, putative                          |
| PF3D7_1208300 | PVVCY_0600710 | 7.685 | 7.843 | 7.820  | 7.205 | mitochondrial ACP precursor, putative                          |
| PF3D7_1452700 | PVVCY_1301800 | 6.642 | 7.157 | 6.967  | 5.709 | U1 snRNA associated protein, putative                          |
| PF3D7_1214300 | PVVCY_1403210 | 6.800 | 6.848 | 6.675  | 6.258 | geranylgeranyl transferase type2 beta subunit, putative        |
| PF3D7_1306300 | PVVCY_1400650 | 4.386 | 5.100 | 4.609  | 3.178 | SAM dependent methyltransferase, putative                      |
| PF3D7_1366400 | PVVCY_1104330 | 7.191 | 6.911 | 6.228  | 5.786 | rhopty protein RHOP148, putative                               |
| PF3D7_1006500 | PVVCY_1200540 | 4.677 | 4.763 | 4.631  | 3.596 | conserved Plasmodium protein, unknown function                 |
| PF3D7_0801700 | PVVCY_1202950 | 5.705 | 6.506 | 6.432  | 6.167 | sentrin-specific protease 2, putative                          |
| PF3D7_1024600 | PVVCY_0500930 | 6.092 | 6.410 | 5.885  | 5.272 | RAP protein, putative                                          |
| PF3D7_1415300 | PVVCY_1003270 | 0.693 | 0.438 | 0.705  | 1.050 | RNA-binding protein Nova-1, putative                           |
| PF3D7_1468200 | PVVCY_1303400 | 4.499 | 4.156 | 4.303  | 4.578 | conserved Plasmodium protein, unknown function                 |
| PF3D7_0317900 | PVVCY_1000900 | 5.047 | 5.750 | 5.302  | 4.126 | conserved Plasmodium protein, unknown function                 |
| PF3D7_1408400 | PVVCY_1003950 | 4.915 | 5.164 | 6.088  | 5.930 | DNA repair helicase, putative                                  |
| PF3D7_1326100 | PVVCY_1304380 | 5.557 | 6.462 | 6.090  | 5.970 | WD repeat-containing protein, putative                         |
| PF3D7_0801700 | PVVCY_1202950 | 5.705 | 6.506 | 6.432  | 6.167 | sentrin-specific protease 2, putative                          |
| PF3D7_0209300 | PVVCY_0300740 | 6.304 | 6.646 | 6.006  | 5.066 | 2C-methyl-D-erythritol 2,4-cyclodiphosphate synthase, putative |
| PF3D7_0615900 | PVVCY_1203160 | 2.101 | 3.397 | 4.396  | 3.820 | conserved Plasmodium protein, unknown function                 |
| PF3D7_1309900 | PVVCY_1401010 | 4.604 | 5.465 | 4.803  | 2.724 | conserved Plasmodium protein, unknown function                 |
| PF3D7_1440700 | PVVCY_1300630 | 5.569 | 5.733 | 5.565  | 4.951 | adaptor complexes medium subunit family                        |
| PF3D7_1233300 | PVVCY_1405010 | 5.036 | 5.294 | 4.320  | 3.292 | pentatricopeptide repeat domain-containing protein, putative   |
| PF3D7_0628900 | PVVCY_1102910 | 4.258 | 4.275 | 3.917  | 2.983 | RAP protein, putative                                          |
| PF3D7_1128400 | PVVCY_0902660 | 6.409 | 6.951 | 7.385  | 6.422 | geranylgeranyl pyrophosphate synthase, putative                |
| PF3D7_0933600 | PVVCY_0803200 | 6.874 | 7.535 | 7.974  | 7.227 | mitochondrial-processing peptidase subunit beta, putative      |
| PF3D7_1237000 | PVVCY_1405380 | 5.522 | 6.664 | 7.038  | 6.284 | SUMO-activating enzyme subunit 2, putative                     |
| PF3D7_1420600 | PVVCY_1002750 | 5.648 | 5.802 | 5.471  | 4.840 | pantothenate kinase, putative                                  |
| PF3D7_0913100 | PVVCY_0801150 | 5.500 | 5.728 | 4.960  | 4.042 | conserved Plasmodium protein, unknown function                 |
| PF3D7_1246700 | PVVCY_1406190 | 4.174 | 5.218 | 4.801  | 4.313 | conserved Plasmodium protein, unknown function                 |
| PF3D7_0926700 | PVVCY_0802510 | 7.154 | 7.246 | 7.017  | 6.454 | glutamine-dependent NAD(+) synthetase, putative                |
| PF3D7_1245200 | PVVCY_1406050 | 3.185 | 3.846 | 3.224  | 2.000 | conserved Plasmodium protein, unknown function                 |
| PF3D7_0829300 | PVVCY_0700130 | 8.071 | 8.938 | 8.533  | 7.672 | U6 snRNA-associated Sm-like protein LSm8, putative             |
| PF3D7_0505800 | PVVCY_1100630 | 9.722 | 9.883 | 10.579 | 9.634 | small ubiquitin-related modifier, putative                     |
| PF3D7_1405400 | PVVCY_1004220 | 4.140 | 5.168 | 4.828  | 3.568 | DNA mismatch repair protein, putative                          |
| PF3D7_1012800 | PVVCY_1201200 | 5.750 | 6.219 | 5.139  | 3.856 | conserved Plasmodium protein, unknown function                 |
| PF3D7_0829100 | PVVCY_0700150 | 7.953 | 7.958 | 7.826  | 7.571 | conserved protein, unknown function                            |

|               |               |        |        |        |       |                                                              |
|---------------|---------------|--------|--------|--------|-------|--------------------------------------------------------------|
| PF3D7_1464100 | PVVCY_1302990 | 5.727  | 5.590  | 4.907  | 4.468 | conserved Plasmodium protein, unknown function               |
| PF3D7_0628800 | PVVCY_1102870 | 5.735  | 6.006  | 5.362  | 4.516 | glutamyl-tRNA(Gln) amidotransferase subunit B, putative      |
| PF3D7_0912000 | PVVCY_1001490 | 3.026  | 3.136  | 5.408  | 5.549 | conserved Plasmodium protein, unknown function               |
| PF3D7_0918600 | PVVCY_0801690 | 4.401  | 5.157  | 6.145  | 6.105 | ATP-dependent DNA helicase Q1, putative                      |
| PF3D7_1216000 | PVVCY_1403370 | 5.715  | 6.074  | 5.448  | 4.856 | serine--tRNA ligase, putative                                |
| PF3D7_1204500 | PVVCY_0600360 | 5.107  | 5.719  | 5.767  | 5.219 | conserved Plasmodium protein, unknown function               |
| PF3D7_1409900 | PVVCY_1003800 | 8.315  | 7.542  | 8.017  | 8.653 | cytidine diphosphate-diacylglycerol synthase, putative       |
| PF3D7_1250800 | PVVCY_1406580 | 5.556  | 6.352  | 6.067  | 5.418 | DNA repair protein rhp16, putative                           |
| PF3D7_1306300 | PVVCY_1400650 | 4.386  | 5.100  | 4.609  | 3.178 | SAM dependent methyltransferase, putative                    |
| PF3D7_0922800 | PVVCY_0802120 | 3.582  | 3.603  | 3.005  | 2.525 | conserved Plasmodium protein, unknown function               |
| PF3D7_0912500 | PVVCY_1001530 | 7.977  | 7.922  | 8.001  | 8.228 | SAP domain-containing protein, putative                      |
| PF3D7_1309800 | PVVCY_1401000 | 7.096  | 7.548  | 6.725  | 5.380 | conserved Plasmodium protein, unknown function               |
| PF3D7_1250800 | PVVCY_1406580 | 5.556  | 6.352  | 6.067  | 5.418 | DNA repair protein rhp16, putative                           |
| PF3D7_0514800 | PVVCY_1101530 | 6.914  | 6.160  | 5.012  | 5.899 | kinase, putative                                             |
| PF3D7_1145500 | PVVCY_0904380 | 4.035  | 4.886  | 5.697  | 5.500 | ABC transporter B family member 3, putative                  |
| PF3D7_1443900 | PVVCY_1300950 | 7.003  | 7.037  | 7.183  | 6.510 | heat shock protein 90, putative                              |
| PF3D7_1446800 | PVVCY_1301220 | 6.258  | 7.249  | 7.533  | 6.741 | heme detoxification protein, putative                        |
| PF3D7_0922800 | PVVCY_0802120 | 3.582  | 3.603  | 3.005  | 2.525 | conserved Plasmodium protein, unknown function               |
| PF3D7_0526100 | PVVCY_1204160 | 5.479  | 6.066  | 4.830  | 3.998 | conserved Plasmodium protein, unknown function               |
| PF3D7_1223700 | PVVCY_1404070 | 7.313  | 7.736  | 7.415  | 6.225 | vacuolar iron transporter, putative                          |
| PF3D7_0104400 | PVVCY_0200850 | 6.718  | 6.559  | 6.200  | 5.643 | 4-hydroxy-3-methylbut-2-enyl diphosphate reductase, putative |
| PF3D7_1029300 | PVVCY_0501380 | 4.663  | 4.640  | 3.694  | 3.074 | conserved Plasmodium protein, unknown function               |
| PF3D7_1304500 | PVVCY_1400470 | 2.983  | 2.968  | 4.698  | 3.338 | small heat shock protein, putative                           |
| PF3D7_1107200 | PVVCY_0900660 | 5.617  | 6.073  | 5.822  | 4.738 | conserved Plasmodium protein, unknown function               |
| PF3D7_0930800 | PVVCY_0802920 | 4.597  | 4.812  | 4.433  | 3.580 | conserved Plasmodium protein, unknown function               |
| PF3D7_1229400 | PVVCY_1404610 | 10.800 | 11.244 | 10.980 | 9.898 | macrophage migration inhibitory factor, putative             |
| PF3D7_0505900 | PVVCY_1100640 | 7.912  | 8.242  | 8.049  | 7.526 | conserved Plasmodium protein, unknown function               |
| PF3D7_1314700 | PVVCY_1401480 | 5.273  | 5.747  | 5.474  | 5.026 | conserved Plasmodium protein, unknown function               |
| PF3D7_1320300 | PVVCY_1402010 | 1.431  | 1.462  | 1.766  | 1.542 | conserved Plasmodium protein, unknown function               |
| PF3D7_0925400 | PVVCY_0802370 | 4.282  | 5.727  | 6.366  | 5.234 | protein phosphatase-beta, putative                           |
| PF3D7_1366400 | PVVCY_1104330 | 7.191  | 6.911  | 6.228  | 5.786 | rhopty protein RHOP148, putative                             |
| PF3D7_0505600 | PVVCY_1100610 | 5.219  | 5.389  | 5.591  | 5.539 | conserved Plasmodium protein, unknown function               |
| PF3D7_1209700 | PVVCY_0600840 | 5.642  | 5.857  | 6.581  | 6.359 | conserved Plasmodium protein, unknown function               |
| PF3D7_1353500 | PVVCY_1103120 | 5.644  | 6.162  | 5.593  | 4.821 | RNA polymerase II transcription factor B subunit 4, putative |
| PF3D7_0301900 | PVVCY_0400150 | 4.267  | 5.166  | 4.205  | 3.380 | conserved Plasmodium protein, unknown function               |





|               |               |       |       |        |        |                                                           |
|---------------|---------------|-------|-------|--------|--------|-----------------------------------------------------------|
| PF3D7_1004800 | PVVCY_1200370 | 5.775 | 5.960 | 5.379  | 5.512  | ADP ATP carrier protein, putative                         |
| PF3D7_0623900 | PVVCY_1102390 | 4.225 | 5.248 | 6.756  | 6.605  | ribonuclease H2 subunit A, putative                       |
| PF3D7_0110700 | PVVCY_0200280 | 9.146 | 9.999 | 11.064 | 10.281 | chromatin assembly factor 1 protein WD40 domain, putative |
| PF3D7_1234700 | PVVCY_1405140 | 4.769 | 4.256 | 4.116  | 4.681  | CPW-WPC family protein                                    |
| PF3D7_0823900 | PVVCY_0700660 | 6.927 | 6.419 | 6.525  | 6.474  | dicarboxylate tricarboxylate carrier, putative            |
| PF3D7_0820400 | PVVCY_0701020 | 4.901 | 5.900 | 4.984  | 3.901  | conserved Plasmodium protein, unknown function            |
| PF3D7_1313700 | PVVCY_1401240 | 6.519 | 6.618 | 5.548  | 5.322  | septum formation protein MAF homologue, putative          |
| PF3D7_0109400 | PVVCY_0200410 | 5.731 | 7.144 | 7.394  | 6.575  | tubulin-specific chaperone a, putative                    |
| PF3D7_0511300 | PVVCY_1101170 | 5.549 | 5.566 | 5.802  | 5.424  | conserved Plasmodium protein, unknown function            |
| PF3D7_1221600 | PVVCY_1403880 | 4.569 | 6.032 | 6.277  | 5.321  | protein TSSC1, putative                                   |
| PF3D7_1333500 | PVVCY_1305090 | 6.048 | 6.607 | 5.515  | 4.352  | conserved Plasmodium protein, unknown function            |
| PF3D7_0504000 | PVVCY_1100450 | 4.963 | 5.200 | 5.351  | 4.909  | cation transporting P-ATPase, putative                    |
| PF3D7_1420600 | PVVCY_1002750 | 5.648 | 5.802 | 5.471  | 4.840  | pantothenate kinase, putative                             |
| PF3D7_0802200 | PVVCY_1202900 | 9.126 | 9.236 | 7.682  | 7.337  | 1-cys peroxiredoxin, putative                             |
| PF3D7_0904100 | PVVCY_0401840 | 7.033 | 6.933 | 6.702  | 6.115  | AP-4 complex subunit epsilon, putative                    |
| PF3D7_1345200 | PVVCY_1306120 | 5.361 | 6.125 | 6.258  | 5.247  | rhomboid protease ROM6, putative                          |
| PF3D7_0614800 | PVVCY_1203050 | 4.965 | 4.413 | 4.827  | 5.285  | endonuclease III homologue, putative                      |
| PF3D7_0907900 | PVVCY_1001110 | 5.277 | 5.808 | 6.313  | 5.462  | peptide deformylase, putative                             |
| PF3D7_1303100 | PVVCY_1400330 | 6.841 | 7.938 | 8.261  | 7.356  | methyltransferase-like protein, putative                  |
| PF3D7_0512500 | PVVCY_1101300 | 4.494 | 5.220 | 4.550  | 3.460  | conserved Plasmodium protein, unknown function            |
| PF3D7_0726500 | PVVCY_0201040 | 7.374 | 7.478 | 7.381  | 6.857  | ubiquitin carboxyl-terminal hydrolase, putative           |
| PF3D7_0913700 | PVVCY_0801210 | 5.427 | 6.099 | 6.201  | 5.693  | conserved Plasmodium protein, unknown function            |
| PF3D7_1432000 | PVVCY_1001770 | 6.621 | 6.620 | 6.599  | 6.412  | SNARE protein, putative                                   |
| PF3D7_1022100 | PVVCY_0500680 | 6.262 | 6.106 | 5.196  | 6.053  | conserved Plasmodium protein, unknown function            |
| PF3D7_0813500 | PVVCY_1402580 | 5.305 | 5.812 | 5.781  | 5.242  | conserved Plasmodium protein, unknown function            |
| PF3D7_0529100 | PVVCY_1204460 | 5.876 | 5.857 | 5.972  | 5.283  | thioredoxin-like protein, putative                        |
| PF3D7_0925800 | PVVCY_0802410 | 1.512 | 1.533 | 1.854  | 1.651  | conserved Plasmodium protein, unknown function            |
| PF3D7_0211700 | PVVCY_0300950 | 6.692 | 7.031 | 6.752  | 5.778  | tyrosine kinase-like protein, putative                    |
| PF3D7_0817400 | PVVCY_0701320 | 4.923 | 5.380 | 5.404  | 4.462  | phosphatase, putative                                     |
| PF3D7_0623000 | PVVCY_1102300 | 5.785 | 6.523 | 6.337  | 5.071  | chorismate synthase, putative                             |
| PF3D7_1433700 | PVVCY_1001600 | 4.763 | 5.178 | 3.965  | 3.193  | conserved Plasmodium protein, unknown function            |
| PF3D7_1005500 | PVVCY_1200440 | 2.652 | 1.893 | 2.704  | 2.968  | regulator of nonsense transcripts 1, putative             |
| PF3D7_1129500 | PVVCY_0902820 | 3.374 | 4.390 | 5.578  | 5.177  | A_G-specific adenine glycosylase, putative                |
| PF3D7_0605800 | PVVCY_0100590 | 2.945 | 4.659 | 4.949  | 4.453  | DNA repair protein RAD50, putative                        |
| PF3D7_0616800 | PVVCY_1101720 | 7.311 | 7.296 | 6.969  | 6.472  | malate:quinone oxidoreductase, putative                   |
| PF3D7_0717100 | PVVCY_0601510 | 6.428 | 6.075 | 5.394  | 5.628  | conserved Plasmodium protein, unknown function            |
| PF3D7_0302600 | PVVCY_0400180 | 4.102 | 4.791 | 5.081  | 4.680  | ABC transporter B family member 4, putative               |
| PF3D7_0506300 | PVVCY_1100680 | 5.675 | 6.157 | 5.568  | 4.383  | conserved Plasmodium protein, unknown function            |

|               |               |       |       |       |       |                                                         |
|---------------|---------------|-------|-------|-------|-------|---------------------------------------------------------|
| PF3D7_0525600 | PVVCY_1204110 | 4.323 | 4.503 | 3.744 | 3.096 | RNA methyltransferase, putative                         |
| PF3D7_1314300 | PVVCY_1401180 | 4.980 | 5.813 | 6.015 | 4.817 | conserved Plasmodium protein, unknown function          |
| PF3D7_1328900 | PVVCY_1304650 | 5.499 | 5.984 | 5.066 | 4.701 | conserved Plasmodium protein, unknown function          |
| PF3D7_0107100 | PVVCY_0200600 | 4.338 | 4.465 | 3.808 | 2.735 | conserved Plasmodium protein, unknown function          |
| PF3D7_0603200 | PVVCY_0100340 | 6.324 | 6.905 | 7.163 | 5.779 | mitochondrial chaperone BCS1, putative                  |
| PF3D7_0920400 | PVVCY_0801870 | 1.980 | 3.047 | 3.723 | 2.843 | conserved Plasmodium protein, unknown function          |
| PF3D7_0512900 | PVVCY_1101340 | 5.788 | 6.565 | 5.354 | 4.677 | AKAP-like protein, putative                             |
| PF3D7_1352000 | PVVCY_1306770 | 6.044 | 6.067 | 5.670 | 5.592 | conserved Plasmodium protein, unknown function          |
| PF3D7_1411700 | PVVCY_1003620 | 5.052 | 4.795 | 3.970 | 3.314 | methyltransferase, putative                             |
| PF3D7_0320800 | PVVCY_1201860 | 8.145 | 8.269 | 8.709 | 7.993 | ATP-dependent RNA helicase DDX6, putative               |
| PF3D7_1437400 | PVVCY_0601150 | 5.204 | 5.653 | 5.165 | 4.263 | pantothenate kinase, putative                           |
| PF3D7_1031600 | PVVCY_0501590 | 6.374 | 5.913 | 6.685 | 6.543 | conserved Plasmodium protein, unknown function          |
| PF3D7_0716600 | PVVCY_0601460 | 5.605 | 5.412 | 6.021 | 5.789 | cysteine desulfurase, putative                          |
| PF3D7_0624400 | PVVCY_1102440 | 6.316 | 6.366 | 6.153 | 6.059 | conserved Plasmodium protein, unknown function          |
| PF3D7_0520800 | PVVCY_1203640 | 4.176 | 4.306 | 4.428 | 3.495 | conserved Plasmodium protein, unknown function          |
| PF3D7_0513600 | PVVCY_1101410 | 4.247 | 3.490 | 6.695 | 7.147 | deoxyribodipyrimidine photo-lyase, putative             |
| PF3D7_0925800 | PVVCY_0802410 | 1.512 | 1.533 | 1.854 | 1.651 | conserved Plasmodium protein, unknown function          |
| PF3D7_1246800 | PVVCY_1406200 | 4.977 | 5.901 | 7.124 | 7.483 | signal recognition particle, beta subunit, putative     |
| PF3D7_1450900 | PVVCY_1301620 | 5.383 | 5.998 | 5.241 | 3.913 | acetyl-CoA acetyltransferase, putative                  |
| PF3D7_1336200 | PVVCY_1305280 | 7.367 | 6.895 | 6.495 | 7.076 | conserved Plasmodium protein, unknown function          |
| PF3D7_0321600 | PVVCY_1201780 | 5.908 | 6.108 | 6.020 | 5.422 | ATP-dependent RNA helicase DDX42, putative              |
| PF3D7_0904100 | PVVCY_0401840 | 7.033 | 6.933 | 6.702 | 6.115 | AP-4 complex subunit epsilon, putative                  |
| PF3D7_1209900 | PVVCY_0600860 | 4.834 | 5.356 | 5.427 | 4.930 | ABC transporter B family member 7, putative             |
| PF3D7_0717100 | PVVCY_0601510 | 6.428 | 6.075 | 5.394 | 5.628 | conserved Plasmodium protein, unknown function          |
| PF3D7_1447300 | PVVCY_1301270 | 6.139 | 7.449 | 7.693 | 6.500 | mitochondrial ribosomal protein S14 precursor, putative |
| PF3D7_0513000 | PVVCY_1101350 | 4.482 | 3.301 | 3.356 | 4.539 | conserved Plasmodium protein, unknown function          |
| PF3D7_1106300 | PVVCY_0900570 | 5.319 | 5.716 | 5.484 | 4.334 | exonuclease, putative                                   |
| PF3D7_0513600 | PVVCY_1101410 | 4.247 | 3.490 | 6.695 | 7.147 | deoxyribodipyrimidine photo-lyase, putative             |
| PF3D7_0422100 | PVVCY_0502320 | 7.384 | 7.142 | 7.187 | 7.059 | transmembrane emp24 domain-containing protein, putative |
| PF3D7_1119000 | PVVCY_0901720 | 7.223 | 6.682 | 6.725 | 7.625 | acyl-CoA-binding protein, putative                      |
| PF3D7_0910400 | PVVCY_1001340 | 6.088 | 6.119 | 5.415 | 4.218 | selenide water dikinase, putative                       |
| PF3D7_0417800 | PVVCY_0701960 | 5.345 | 5.421 | 5.614 | 5.731 | cdc2-related protein kinase 1, putative                 |
| PF3D7_1443800 | PVVCY_1300940 | 6.462 | 6.229 | 6.373 | 6.325 | pre-mRNA-splicing factor CWC24, putative                |
| PF3D7_0629100 | PVVCY_1102890 | 9.252 | 8.950 | 7.905 | 6.957 | nicotinate phosphoribosyltransferase, putative          |
| PF3D7_0824200 | PVVCY_0700630 | 4.336 | 5.660 | 5.897 | 5.248 | conserved Plasmodium protein, unknown function          |
| PF3D7_1307200 | PVVCY_1400740 | 5.623 | 6.061 | 5.780 | 5.431 | DnaJ protein, putative                                  |

|               |               |       |        |        |        |                                                                                                             |
|---------------|---------------|-------|--------|--------|--------|-------------------------------------------------------------------------------------------------------------|
| PF3D7_0813500 | PVVCY_1402580 | 5.305 | 5.812  | 5.781  | 5.242  | conserved Plasmodium protein, unknown function                                                              |
| PF3D7_0213400 | PVVCY_0301120 | 3.344 | 3.813  | 4.414  | 4.010  | protein kinase 7, putative                                                                                  |
| PF3D7_0507700 | PVVCY_1100820 | 7.420 | 7.628  | 7.570  | 6.559  | nuclear protein localization protein 4, putative                                                            |
| PF3D7_0213200 | PVVCY_0301100 | 5.064 | 6.246  | 5.704  | 4.803  | conserved Plasmodium protein, unknown function                                                              |
| PF3D7_1320800 | PVVCY_1402060 | 7.598 | 8.050  | 7.907  | 7.116  | dihydrolipoyllysine-residue succinyltransferase component of 2-oxoglutarate dehydrogenase complex, putative |
| PF3D7_1357200 | PVVCY_1103470 | 6.122 | 6.074  | 5.795  | 4.813  | glutamate--tRNA ligase, putative                                                                            |
| PF3D7_0629100 | PVVCY_1102890 | 9.252 | 8.950  | 7.905  | 6.957  | nicotinate phosphoribosyltransferase, putative                                                              |
| PF3D7_0925800 | PVVCY_0802410 | 1.512 | 1.533  | 1.854  | 1.651  | conserved Plasmodium protein, unknown function                                                              |
| PF3D7_1443400 | PVVCY_1300900 | 5.121 | 6.413  | 7.387  | 6.455  | WD repeat-containing protein, putative                                                                      |
| PF3D7_0422900 | PVVCY_0502400 | 5.705 | 6.421  | 6.044  | 4.902  | conserved Plasmodium protein, unknown function                                                              |
| PF3D7_0727000 | PVVCY_0201080 | 4.795 | 4.788  | 5.119  | 4.802  | vacuolar protein sorting-associated protein 53, putative                                                    |
| PF3D7_1369600 | PVVCY_1104660 | 4.993 | 5.422  | 5.708  | 4.783  | conserved Plasmodium protein, unknown function                                                              |
| PF3D7_0903200 | PVVCY_0401930 | 8.004 | 8.587  | 8.977  | 8.655  | ras-related protein RAB7, putative                                                                          |
| PF3D7_0721100 | PVVCY_0601890 | 9.671 | 9.820  | 10.257 | 9.867  | conserved Plasmodium protein, unknown function                                                              |
| PF3D7_1223600 | PVVCY_1404060 | 3.340 | 3.836  | 4.304  | 3.657  | conserved Plasmodium protein, unknown function                                                              |
| PF3D7_1441700 | PVVCY_1300730 | 5.532 | 5.999  | 5.664  | 4.586  | mitochondrial inner membrane protease ATP23, putative                                                       |
| PF3D7_1427900 | PVVCY_1002160 | 9.181 | 10.188 | 11.177 | 11.001 | conserved Plasmodium protein, unknown function                                                              |
| PF3D7_1025200 | PVVCY_0500990 | 4.640 | 5.230  | 4.665  | 3.301  | ATP synthase mitochondrial F1 complex assembly factor 2, putative                                           |
| PF3D7_1004900 | PVVCY_1200380 | 5.222 | 5.715  | 5.386  | 4.575  | conserved Plasmodium protein, unknown function                                                              |
| PF3D7_1222900 | PVVCY_1403990 | 3.995 | 4.268  | 3.808  | 2.989  | conserved Plasmodium protein, unknown function                                                              |
| PF3D7_1366200 | PVVCY_1104310 | 5.162 | 5.629  | 5.189  | 5.022  | conserved Plasmodium protein, unknown function                                                              |
| PF3D7_1411400 | PVVCY_1003650 | 3.893 | 4.738  | 5.878  | 4.887  | plastid replication-repair enzyme, putative                                                                 |
| PF3D7_0920400 | PVVCY_0801870 | 1.980 | 3.047  | 3.723  | 2.843  | conserved Plasmodium protein, unknown function                                                              |
| PF3D7_0824200 | PVVCY_0700630 | 4.336 | 5.660  | 5.897  | 5.248  | conserved Plasmodium protein, unknown function                                                              |
| PF3D7_0103900 | PVVCY_0200900 | 6.807 | 7.218  | 7.814  | 7.561  | parasite-infected erythrocyte surface protein                                                               |
| PF3D7_1469700 | PVVCY_1303540 | 5.739 | 6.256  | 6.427  | 5.386  | mediator of RNA polymerase II transcription subunit 6, putative                                             |
| PF3D7_0910800 | PVVCY_1001370 | 6.683 | 5.759  | 5.871  | 7.068  | cytosolic Fe-S cluster assembly factor NBP35, putative                                                      |
| PF3D7_1206800 | PVVCY_0600580 | 5.207 | 5.649  | 5.065  | 3.883  | conserved Plasmodium protein, unknown function                                                              |
| PF3D7_0822000 | PVVCY_0700860 | 6.327 | 6.615  | 6.418  | 5.156  | mitochondrial ribosomal protein L4 precursor, putative                                                      |
| PF3D7_1212400 | PVVCY_1403040 | 2.766 | 2.834  | 5.573  | 5.978  | tetratricopeptide repeat protein, putative                                                                  |
| PF3D7_1213600 | PVVCY_1403140 | 6.328 | 7.671  | 8.985  | 8.838  | dynein light chain 1, putative                                                                              |
| PF3D7_0102800 | PVVCY_0201010 | 0.134 | 0.501  | 0.065  | 0.299  | conserved Plasmodium protein, unknown function                                                              |
| PF3D7_1410300 | PVVCY_1003760 | 4.649 | 4.344  | 4.158  | 3.514  | WD repeat-containing protein, putative                                                                      |

|               |               |       |        |        |        |                                                                                                             |
|---------------|---------------|-------|--------|--------|--------|-------------------------------------------------------------------------------------------------------------|
| PF3D7_1314500 | PVVCY_1401460 | 7.374 | 7.276  | 7.160  | 7.158  | cop-coated vesicle membrane protein p24 precursor, putative                                                 |
| PF3D7_1208700 | PVVCY_0600750 | 4.111 | 4.558  | 3.583  | 2.838  | conserved protein, unknown function                                                                         |
| PF3D7_1417700 | PVVCY_1003030 | 6.371 | 6.848  | 7.508  | 7.268  | conserved Plasmodium protein, unknown function                                                              |
| PF3D7_1467500 | PVVCY_1303330 | 6.079 | 6.310  | 6.245  | 6.119  | DNA RNA-binding protein KIN17, putative                                                                     |
| PF3D7_1427900 | PVVCY_1002160 | 9.181 | 10.188 | 11.177 | 11.001 | conserved Plasmodium protein, unknown function                                                              |
| PF3D7_0417800 | PVVCY_0701960 | 5.345 | 5.421  | 5.614  | 5.731  | cdc2-related protein kinase 1, putative                                                                     |
| PF3D7_1475300 | PVVCY_1300260 | 5.206 | 5.791  | 5.626  | 4.848  | cytochrome c oxidase assembly protein COX11, putative                                                       |
| PF3D7_0319100 | PVVCY_1000790 | 7.201 | 8.639  | 8.790  | 7.274  | E3 ubiquitin-protein ligase RBX1, putative                                                                  |
| PF3D7_0303700 | PVVCY_0400290 | 4.323 | 6.001  | 7.287  | 6.869  | lipoamide acyltransferase component of branched- chain alpha-keto acid dehydrogenase complex, putative      |
| PF3D7_1103400 | PVVCY_0900280 | 5.922 | 5.634  | 6.136  | 5.773  | FeS cluster assembly protein SufD, putative                                                                 |
| PF3D7_1437800 | PVVCY_0601110 | 6.948 | 7.431  | 6.584  | 5.847  | trafficking protein particle complex subunit 5, putative                                                    |
| PF3D7_1459700 | PVVCY_1302480 | 6.726 | 7.571  | 6.845  | 5.373  | pyridoxal 5'-phosphate synthase, putative                                                                   |
| PF3D7_1205700 | PVVCY_0600480 | 1.594 | 3.287  | 3.952  | 3.226  | targeted glyoxalase II, putative                                                                            |
| PF3D7_1464500 | PVVCY_1303030 | 6.619 | 6.076  | 5.736  | 6.049  | conserved Plasmodium protein, unknown function                                                              |
| PF3D7_1246800 | PVVCY_1406200 | 4.977 | 5.901  | 7.124  | 7.483  | signal recognition particle, beta subunit, putative                                                         |
| PF3D7_0910400 | PVVCY_1001340 | 6.088 | 6.119  | 5.415  | 4.218  | selenide water dikinase, putative                                                                           |
| PF3D7_1320800 | PVVCY_1402060 | 7.598 | 8.050  | 7.907  | 7.116  | dihydrolipoyllysine-residue succinyltransferase component of 2-oxoglutarate dehydrogenase complex, putative |
| PF3D7_1343300 | PVVCY_1305940 | 4.881 | 4.740  | 7.388  | 7.714  | conserved Plasmodium protein, unknown function                                                              |
| PF3D7_1345700 | PVVCY_1306170 | 6.541 | 7.095  | 7.434  | 6.461  | isocitrate dehydrogenase [NADP], mitochondrial, putative                                                    |
| PF3D7_0219500 | PVVCY_0301680 | 6.642 | 6.755  | 6.191  | 5.419  | pseudouridine synthase, putative                                                                            |
| PF3D7_1112400 | PVVCY_0901100 | 4.386 | 6.022  | 5.671  | 4.902  | conserved Plasmodium protein, unknown function                                                              |
| PF3D7_1244000 | PVVCY_1405940 | 6.032 | 5.781  | 5.349  | 4.269  | glucose inhibited division protein a homologue, putative                                                    |
| PF3D7_1469000 | PVVCY_1303470 | 6.290 | 6.750  | 6.191  | 5.825  | translation initiation factor IF-1, putative                                                                |
| PF3D7_1463200 | PVVCY_1302830 | 4.758 | 6.537  | 7.953  | 7.296  | replication factor C subunit 3, putative                                                                    |
| PF3D7_1367000 | PVVCY_1104390 | 8.622 | 9.185  | 9.513  | 8.782  | suppressor of kinetochore protein 1, putative                                                               |
| PF3D7_1474800 | PVVCY_1300300 | 9.169 | 9.967  | 9.901  | 8.941  | proteasome subunit alpha type-1, putative                                                                   |
| PF3D7_0519300 | PVVCY_1203500 | 5.058 | 5.451  | 5.397  | 4.849  | protoheme IX farnesyltransferase, putative                                                                  |
| PF3D7_1323600 | PVVCY_1304140 | 6.912 | 6.743  | 6.658  | 6.101  | conserved Plasmodium protein, unknown function                                                              |
| PF3D7_1317600 | PVVCY_1401770 | 4.821 | 5.867  | 6.038  | 5.723  | conserved Plasmodium protein, unknown function                                                              |
| PF3D7_1203600 | PVVCY_0600280 | 6.476 | 6.641  | 6.604  | 5.850  | cytochrome c1 heme lyase, putative                                                                          |
| PF3D7_1416300 | PVVCY_1003170 | 5.025 | 5.531  | 5.126  | 4.329  | conserved Plasmodium protein, unknown function                                                              |
| PF3D7_1018000 | PVVCY_0500270 | 6.092 | 6.189  | 5.977  | 5.199  | tRNA pseudouridine synthase, putative                                                                       |
| PF3D7_0804400 | PVVCY_1202720 | 5.969 | 6.630  | 7.012  | 6.207  | methionine aminopeptidase 1c, putative                                                                      |
| PF3D7_0520400 | PVVCY_1203610 | 4.704 | 6.267  | 7.008  | 6.851  | conserved Plasmodium protein, unknown function                                                              |

|               |               |       |       |        |       |                                                           |
|---------------|---------------|-------|-------|--------|-------|-----------------------------------------------------------|
| PF3D7_0313600 | PVVCY_0401240 | 3.724 | 2.756 | 3.034  | 3.822 | conserved Plasmodium protein, unknown function            |
| PF3D7_1353900 | PVVCY_1103160 | 9.340 | 9.971 | 10.068 | 8.882 | proteasome subunit alpha type-7, putative                 |
| PF3D7_1339900 | PVVCY_1305630 | 3.045 | 4.307 | 4.964  | 4.210 | ABC transporter B family member 5, putative               |
| PF3D7_0728300 | PVVCY_0201210 | 5.485 | 6.675 | 6.868  | 5.911 | conserved Plasmodium protein, unknown function            |
| PF3D7_1249300 | PVVCY_1406430 | 7.725 | 7.736 | 7.169  | 6.230 | protein phosphatase PPM4, putative                        |
| PF3D7_0316400 | PVVCY_0401530 | 5.259 | 5.768 | 5.568  | 4.558 | conserved Plasmodium protein, unknown function            |
| PF3D7_0611300 | PVVCY_0101100 | 5.878 | 7.294 | 8.141  | 7.427 | conserved Plasmodium protein, unknown function            |
| PF3D7_0610000 | PVVCY_0100990 | 6.995 | 7.356 | 6.758  | 5.606 | mitochondrial ribosomal protein L19 precursor, putative   |
| PF3D7_0513600 | PVVCY_1101410 | 4.247 | 3.490 | 6.695  | 7.147 | deoxyribodipyrimidine photo-lyase, putative               |
| PF3D7_1310000 | PVVCY_1401020 | 4.382 | 5.445 | 6.478  | 6.364 | mitochondrial ATP synthase delta subunit, putative        |
| PF3D7_1360700 | PVVCY_1103800 | 5.699 | 5.022 | 6.135  | 6.397 | E3 SUMO-protein ligase PIAS, putative                     |
| PF3D7_1236700 | PVVCY_1405350 | 5.887 | 5.754 | 5.496  | 5.404 | S-adenosyl-methyltransferase, putative                    |
| PF3D7_0903200 | PVVCY_0401930 | 8.004 | 8.587 | 8.977  | 8.655 | ras-related protein RAB7, putative                        |
| PF3D7_1320200 | PVVCY_1402000 | 5.439 | 5.689 | 5.296  | 4.325 | TBC domain protein, putative                              |
| PF3D7_1213600 | PVVCY_1403140 | 6.328 | 7.671 | 8.985  | 8.838 | dynein light chain 1, putative                            |
| PF3D7_1431000 | PVVCY_1001850 | 6.844 | 7.314 | 7.106  | 6.126 | mitochondrial ribosomal protein L17-2 precursor, putative |
| PF3D7_1432800 | PVVCY_1001690 | 6.502 | 5.966 | 6.132  | 6.221 | HP12 protein homolog, putative                            |
| PF3D7_0418900 | PVVCY_0702070 | 3.527 | 2.268 | 4.527  | 5.882 | conserved Plasmodium protein, unknown function            |
| PF3D7_1469800 | PVVCY_1303550 | 6.884 | 7.585 | 7.162  | 6.234 | conserved Plasmodium protein, unknown function            |
| PF3D7_1234300 | PVVCY_1405100 | 3.759 | 5.257 | 6.619  | 6.360 | DNA polymerase epsilon subunit B, putative                |
| PF3D7_0519900 | PVVCY_1203560 | 5.927 | 6.264 | 6.889  | 6.772 | conserved Plasmodium protein, unknown function            |
| PF3D7_1469800 | PVVCY_1303550 | 6.884 | 7.585 | 7.162  | 6.234 | conserved Plasmodium protein, unknown function            |
| PF3D7_1320200 | PVVCY_1402000 | 5.439 | 5.689 | 5.296  | 4.325 | TBC domain protein, putative                              |
| PF3D7_0412100 | PVVCY_0601370 | 5.935 | 6.513 | 6.274  | 5.322 | mitochondrial ribosomal protein S12 precursor, putative   |
| PF3D7_0608100 | PVVCY_0100800 | 5.383 | 6.016 | 5.866  | 5.053 | conserved Plasmodium protein, unknown function            |
| PF3D7_1017000 | PVVCY_0500170 | 4.336 | 5.945 | 7.274  | 6.290 | DNA polymerase delta catalytic subunit, putative          |
| PF3D7_1120900 | PVVCY_0901890 | 5.501 | 6.044 | 5.786  | 5.681 | heat shock factor-binding protein 1, putative             |
| PF3D7_0521200 | PVVCY_1203670 | 3.828 | 4.837 | 4.373  | 3.577 | conserved Plasmodium protein, unknown function            |
| PF3D7_1342300 | PVVCY_1305850 | 4.578 | 5.588 | 4.721  | 3.897 | tetratricopeptide repeat protein, putative                |
| PF3D7_1132300 | PVVCY_0903100 | 5.260 | 6.962 | 7.761  | 7.593 | nucleic acid binding protein, putative                    |
| PF3D7_0110000 | PVVCY_0200340 | 6.446 | 6.730 | 6.019  | 5.952 | conserved Plasmodium protein, unknown function            |
| PF3D7_0314200 | PVVCY_0401310 | 4.149 | 4.331 | 4.859  | 4.753 | conserved Plasmodium protein, unknown function            |
| PF3D7_1120800 | PVVCY_0901880 | 7.793 | 7.472 | 8.161  | 6.997 | conserved Plasmodium protein, unknown function            |
| PF3D7_0827600 | PVVCY_0700300 | 5.185 | 5.691 | 5.542  | 4.569 | conserved Plasmodium protein, unknown function            |
| PF3D7_1445300 | PVVCY_1301080 | 4.947 | 5.478 | 5.012  | 3.854 | mitochondrial ribosomal protein S29 precursor, putative   |
| PF3D7_0715400 | PVVCY_1402350 | 5.223 | 4.936 | 4.488  | 5.091 | secreted ookinete protein, putative                       |

|               |               |        |        |        |        |                                                           |
|---------------|---------------|--------|--------|--------|--------|-----------------------------------------------------------|
| PF3D7_0930800 | PVVCY_0802920 | 4.597  | 4.812  | 4.433  | 3.580  | conserved Plasmodium protein, unknown function            |
| PF3D7_1239700 | PVVCY_1405630 | 8.188  | 7.664  | 7.831  | 7.640  | ATP-dependent zinc metalloprotease FTSH 1, putative       |
| PF3D7_1234300 | PVVCY_1405100 | 3.759  | 5.257  | 6.619  | 6.360  | DNA polymerase epsilon subunit B, putative                |
| PF3D7_1308400 | PVVCY_1400860 | 3.445  | 3.574  | 4.832  | 4.631  | conserved Plasmodium protein, unknown function            |
| PF3D7_1123700 | PVVCY_0902170 | 5.895  | 7.150  | 6.597  | 5.260  | mitochondrial ribosomal protein L37, putative             |
| PF3D7_1314200 | PVVCY_1401190 | 1.661  | 3.643  | 4.132  | 3.291  | telomerase reverse transcriptase, putative                |
| PF3D7_0515900 | PVVCY_1101640 | 8.602  | 8.454  | 8.360  | 8.823  | NLI interacting factor-like phosphatase, putative         |
| PF3D7_0518300 | PVVCY_1203400 | 8.987  | 9.569  | 9.746  | 8.729  | proteasome subunit beta type-1, putative                  |
| PF3D7_1034400 | PVVCY_0501870 | 4.485  | 5.084  | 5.460  | 4.106  | flavoprotein subunit of succinate dehydrogenase, putative |
| PF3D7_1141600 | PVVCY_0904000 | 3.522  | 5.130  | 6.357  | 6.072  | dolichol-phosphate mannosyltransferase, putative          |
| PF3D7_0820800 | PVVCY_0700980 | 5.676  | 6.168  | 6.135  | 5.418  | conserved Plasmodium protein, unknown function            |
| PF3D7_1226900 | PVVCY_1404380 | 10.737 | 9.937  | 9.552  | 10.657 | conserved Plasmodium protein, unknown function            |
| PF3D7_0803800 | PVVCY_1202750 | 9.300  | 10.108 | 10.344 | 9.183  | proteasome subunit beta type-4, putative                  |
| PF3D7_1110500 | PVVCY_0900920 | 6.233  | 6.613  | 6.694  | 6.474  | vacuolar protein sorting-associated protein 35, putative  |
| PF3D7_1303800 | PVVCY_1400400 | 1.213  | 1.428  | 3.383  | 3.603  | conserved Plasmodium protein, unknown function            |
| PF3D7_1368700 | PVVCY_1104560 | 4.986  | 5.653  | 5.718  | 4.911  | mitochondrial carrier protein, putative                   |
| PF3D7_1335800 | PVVCY_1305240 | 6.059  | 6.522  | 6.371  | 5.987  | conserved Plasmodium protein, unknown function            |
| PF3D7_0803700 | PVVCY_1202760 | 4.922  | 6.854  | 7.901  | 7.252  | tubulin gamma chain, putative                             |
| PF3D7_1111100 | PVVCY_0900980 | 4.396  | 5.642  | 7.298  | 7.044  | replication factor C subunit 5, putative                  |
| PF3D7_1339800 | PVVCY_1305620 | 5.137  | 7.308  | 8.035  | 7.181  | mitotic-spindle organizing protein 1, putative            |
| PF3D7_0611300 | PVVCY_0101100 | 5.878  | 7.294  | 8.141  | 7.427  | conserved Plasmodium protein, unknown function            |
| PF3D7_0613700 | PVVCY_0101330 | 6.007  | 5.641  | 5.549  | 6.108  | syntaxin binding protein, putative                        |
| PF3D7_1025700 | PVVCY_0501040 | 7.826  | 8.519  | 7.720  | 7.035  | conserved Plasmodium protein, unknown function            |
| PF3D7_1235700 | PVVCY_1405240 | 6.080  | 7.669  | 8.823  | 7.850  | ATP synthase subunit beta, mitochondrial, putative        |
| PF3D7_1403400 | PVVCY_1004400 | 2.287  | 1.856  | 1.857  | 2.703  | conserved Plasmodium protein, unknown function            |
| PF3D7_1330600 | PVVCY_1304830 | 7.319  | 7.896  | 7.621  | 6.232  | elongation factor Tu, putative                            |
| PF3D7_0930800 | PVVCY_0802920 | 4.597  | 4.812  | 4.433  | 3.580  | conserved Plasmodium protein, unknown function            |
| PF3D7_1019800 | PVVCY_0500450 | 6.034  | 6.307  | 4.734  | 4.478  | tRNA methyltransferase, putative                          |
| PF3D7_1002600 | PVVCY_1200160 | 4.205  | 5.118  | 5.382  | 4.586  | conserved Plasmodium protein, unknown function            |
| PF3D7_1103800 | PVVCY_0900320 | 6.753  | 6.743  | 6.904  | 6.045  | CCR4-NOT transcription complex subunit 1, putative        |
| PF3D7_1436800 | PVVCY_0601210 | 5.497  | 5.567  | 5.158  | 4.124  | ATP-dependent Clp protease proteolytic subunit, putative  |
| PF3D7_1326600 | PVVCY_1304440 | 2.252  | 3.977  | 4.786  | 4.468  | conserved Plasmodium protein, unknown function            |
| PF3D7_0815700 | PVVCY_0701490 | 3.603  | 4.273  | 4.544  | 4.634  | ubiquitin, putative                                       |
| PF3D7_0931400 | PVVCY_0802980 | 5.411  | 6.633  | 6.022  | 5.851  | conserved Plasmodium protein, unknown function            |
| PF3D7_1236000 | PVVCY_1405270 | 6.688  | 6.776  | 6.000  | 6.190  | vesicle transport v-SNARE protein VT11, putative          |

|               |               |       |        |        |       |                                                               |
|---------------|---------------|-------|--------|--------|-------|---------------------------------------------------------------|
| PF3D7_1024300 | PVVCY_0500900 | 6.050 | 7.636  | 8.354  | 7.682 | conserved Plasmodium protein, unknown function                |
| PF3D7_1303800 | PVVCY_1400400 | 1.213 | 1.428  | 3.383  | 3.603 | conserved Plasmodium protein, unknown function                |
| PF3D7_0715800 | PVVCY_1402390 | 6.514 | 6.856  | 6.301  | 6.274 | drug metabolite transporter, putative                         |
| PF3D7_1430600 | PVVCY_1001890 | 2.455 | 3.829  | 4.698  | 3.928 | exodeoxyribonuclease III, putative                            |
| PF3D7_1140300 | PVVCY_0903870 | 2.483 | 3.034  | 5.315  | 5.339 | P-loop containing nucleoside triphosphate hydrolase, putative |
| PF3D7_1333200 | PVVCY_1305060 | 3.801 | 3.996  | 5.380  | 5.462 | ubiquitin activating enzyme, putative                         |
| PF3D7_0709500 | PVVCY_1202090 | 5.600 | 6.464  | 6.840  | 6.266 | conserved Plasmodium protein, unknown function                |
| PF3D7_0411300 | PVVCY_0601280 | 5.015 | 5.337  | 5.390  | 5.047 | conserved Plasmodium protein, unknown function                |
| PF3D7_1406400 | PVVCY_1004120 | 5.281 | 5.459  | 5.728  | 4.938 | pentatricopeptide repeat domain-containing protein, putative  |
| PF3D7_1451800 | PVVCY_1301710 | 7.513 | 7.111  | 7.949  | 7.897 | sortilin, putative                                            |
| PF3D7_0416600 | PVVCY_0701840 | 3.935 | 4.152  | 4.276  | 3.796 | prohibitin-like protein, putative                             |
| PF3D7_1223300 | PVVCY_1404030 | 5.652 | 6.064  | 6.630  | 6.317 | DNA gyrase subunit A, putative                                |
| PF3D7_0904100 | PVVCY_0401840 | 7.033 | 6.933  | 6.702  | 6.115 | AP-4 complex subunit epsilon, putative                        |
| PF3D7_1250300 | PVVCY_1406530 | 6.177 | 6.860  | 7.018  | 6.761 | vacuolar protein sorting-associated protein 26, putative      |
| PF3D7_0529300 | PVVCY_1204470 | 6.925 | 7.215  | 6.589  | 6.454 | apicoplast TIC22 protein, putative                            |
| PF3D7_1314200 | PVVCY_1401190 | 1.661 | 3.643  | 4.132  | 3.291 | telomerase reverse transcriptase, putative                    |
| PF3D7_0323200 | PVVCY_1201610 | 4.784 | 5.610  | 5.231  | 4.393 | conserved Plasmodium protein, unknown function                |
| PF3D7_1454700 | PVVCY_1301990 | 9.018 | 9.626  | 9.637  | 8.090 | 6-phosphogluconate dehydrogenase, decarboxylating, putative   |
| PF3D7_1462200 | PVVCY_1302740 | 8.661 | 9.340  | 8.948  | 8.191 | conserved Plasmodium protein, unknown function                |
| PF3D7_0715600 | PVVCY_1402370 | 5.634 | 6.282  | 6.201  | 4.959 | GTP-binding translation elongation factor, putative           |
| PF3D7_1431000 | PVVCY_1001850 | 6.844 | 7.314  | 7.106  | 6.126 | mitochondrial ribosomal protein L17-2 precursor, putative     |
| PF3D7_1012100 | PVVCY_1201130 | 6.128 | 6.663  | 5.767  | 4.973 | conserved Plasmodium protein, unknown function                |
| PF3D7_0515100 | PVVCY_1101560 | 4.713 | 4.784  | 4.661  | 3.719 | rhomboid protease ROM9, putative                              |
| PF3D7_0904800 | PVVCY_0401770 | 5.619 | 6.711  | 8.083  | 7.860 | replication protein A1, small fragment                        |
| PF3D7_1024700 | PVVCY_0500940 | 5.720 | 6.360  | 6.447  | 5.397 | conserved Plasmodium protein, unknown function                |
| PF3D7_1436700 | PVVCY_0601220 | 4.996 | 5.193  | 4.728  | 3.916 | conserved Plasmodium protein, unknown function                |
| PF3D7_0317400 | PVVCY_1000950 | 3.502 | 3.840  | 5.862  | 6.229 | DNA replication complex GINS protein, putative                |
| PF3D7_0930800 | PVVCY_0802920 | 4.597 | 4.812  | 4.433  | 3.580 | conserved Plasmodium protein, unknown function                |
| PF3D7_1366500 | PVVCY_1104340 | 9.032 | 10.098 | 10.401 | 9.276 | nucleoside diphosphate kinase b, putative                     |
| PF3D7_0626900 | PVVCY_1102690 | 5.923 | 6.493  | 5.972  | 5.181 | mitochondrial ribosomal protein L46 precursor, putative       |
| PF3D7_0608500 | PVVCY_0100850 | 8.677 | 9.592  | 9.513  | 8.402 | proteasome subunit alpha type-2, putative                     |
| PF3D7_1147300 | PVVCY_0904550 | 5.028 | 5.623  | 6.072  | 5.506 | conserved Plasmodium protein, unknown function                |
| PF3D7_0813200 | PVVCY_1402620 | 5.374 | 6.442  | 6.468  | 5.287 | CS domain protein, putative                                   |
| PF3D7_0904800 | PVVCY_0401770 | 5.619 | 6.711  | 8.083  | 7.860 | replication protein A1, small fragment                        |
| PF3D7_0807500 | PVVCY_1202400 | 8.466 | 9.127  | 9.213  | 8.104 | proteasome subunit alpha type-6, putative                     |

|               |               |       |       |       |       |                                                         |
|---------------|---------------|-------|-------|-------|-------|---------------------------------------------------------|
| PF3D7_0205600 | PVVCY_0300420 | 4.713 | 5.742 | 5.719 | 5.342 | conserved Plasmodium protein, unknown function          |
| PF3D7_1308400 | PVVCY_1400860 | 3.445 | 3.574 | 4.832 | 4.631 | conserved Plasmodium protein, unknown function          |
| PF3D7_1303800 | PVVCY_1400400 | 1.213 | 1.428 | 3.383 | 3.603 | conserved Plasmodium protein, unknown function          |
| PF3D7_1239100 | PVVCY_1405580 | 6.311 | 7.221 | 7.043 | 5.511 | mitochondrial ribosomal protein L23 precursor, putative |
| PF3D7_1308400 | PVVCY_1400860 | 3.445 | 3.574 | 4.832 | 4.631 | conserved Plasmodium protein, unknown function          |
| PF3D7_0313700 | PVVCY_0401250 | 5.011 | 5.857 | 6.558 | 6.059 | conserved Plasmodium protein, unknown function          |
| PF3D7_0313600 | PVVCY_0401240 | 3.724 | 2.756 | 3.034 | 3.822 | conserved Plasmodium protein, unknown function          |
| PF3D7_1311300 | PVVCY_1401150 | 4.421 | 5.694 | 6.590 | 6.115 | ATP synthase subunit gamma, mitochondrial, putative     |
| PF3D7_0721400 | PVVCY_0601920 | 6.725 | 7.751 | 8.453 | 7.978 | conserved Plasmodium protein, unknown function          |
| PF3D7_0513800 | PVVCY_1101430 | 7.906 | 8.299 | 8.147 | 7.547 | ras-related protein Rab-1A, putative                    |
| PF3D7_1306700 | PVVCY_1400690 | 7.090 | 6.709 | 6.567 | 7.494 | conserved Plasmodium protein, unknown function          |
| PF3D7_0504400 | PVVCY_1100490 | 5.725 | 6.050 | 6.011 | 4.959 | ATP-dependent helicase, putative                        |
| PF3D7_0313600 | PVVCY_0401240 | 3.724 | 2.756 | 3.034 | 3.822 | conserved Plasmodium protein, unknown function          |
| PF3D7_1308400 | PVVCY_1400860 | 3.445 | 3.574 | 4.832 | 4.631 | conserved Plasmodium protein, unknown function          |
| PF3D7_0716300 | PVVCY_0601430 | 9.298 | 9.584 | 9.825 | 9.565 | conserved Plasmodium protein, unknown function          |
| PF3D7_0105100 | PVVCY_0200800 | 8.238 | 9.000 | 9.454 | 8.600 | conserved Plasmodium protein, unknown function          |
| PF3D7_1333200 | PVVCY_1305060 | 3.801 | 3.996 | 5.380 | 5.462 | ubiquitin activating enzyme, putative                   |
| PF3D7_1233000 | PVVCY_1404980 | 6.297 | 6.730 | 6.705 | 5.500 | elongation factor G, putative                           |
| PF3D7_0933300 | PVVCY_0803170 | 3.233 | 4.435 | 4.635 | 4.091 | conserved Plasmodium protein, unknown function          |
| PF3D7_1318100 | PVVCY_1401820 | 6.512 | 7.056 | 7.038 | 6.229 | ferredoxin, putative                                    |
| PF3D7_1341800 | PVVCY_1305800 | 6.305 | 5.666 | 5.691 | 5.995 | inner membrane complex protein 1k, putative             |
| PF3D7_0314200 | PVVCY_0401310 | 4.149 | 4.331 | 4.859 | 4.753 | conserved Plasmodium protein, unknown function          |
| PF3D7_0111300 | PVVCY_0200230 | 2.745 | 2.813 | 5.189 | 5.544 | replication factor c protein, putative                  |
| PF3D7_0313600 | PVVCY_0401240 | 3.724 | 2.756 | 3.034 | 3.822 | conserved Plasmodium protein, unknown function          |
| PF3D7_0210300 | PVVCY_0300820 | 5.469 | 5.917 | 6.230 | 5.540 | monocarboxylate transporter, putative                   |
| PF3D7_0214200 | PVVCY_0301200 | 6.230 | 7.129 | 7.153 | 6.017 | mitochondrial large ribosomal subunit, putative         |
| PF3D7_1335700 | PVVCY_1305230 | 5.411 | 5.379 | 5.292 | 4.795 | conserved Plasmodium protein, unknown function          |
| PF3D7_0607200 | PVVCY_0100710 | 5.017 | 5.413 | 5.007 | 4.559 | RING zinc finger protein, putative                      |
| PF3D7_0406800 | PVVCY_0800470 | 6.180 | 7.222 | 7.117 | 5.556 | ribosomal protein L25, putative                         |
| PF3D7_0707800 | PVVCY_1000670 | 5.655 | 5.949 | 6.090 | 5.173 | RAP protein, putative                                   |
| PF3D7_1106400 | PVVCY_0900580 | 2.697 | 3.847 | 3.274 | 2.335 | conserved Plasmodium protein, unknown function          |
| PF3D7_1308400 | PVVCY_1400860 | 3.445 | 3.574 | 4.832 | 4.631 | conserved Plasmodium protein, unknown function          |
| PF3D7_1463300 | PVVCY_1302840 | 4.481 | 5.742 | 6.822 | 6.442 | DNA polymerase alpha subunit B, putative                |
| PF3D7_1448400 | PVVCY_1301380 | 7.212 | 7.152 | 6.895 | 6.212 | ubiquitin-protein ligase, putative                      |
| PF3D7_1363700 | PVVCY_1104080 | 4.563 | 5.271 | 5.249 | 4.265 | conserved Plasmodium protein, unknown function          |
| PF3D7_0406800 | PVVCY_0800470 | 6.180 | 7.222 | 7.117 | 5.556 | ribosomal protein L25, putative                         |



|               |               |       |       |       |       |                                                            |
|---------------|---------------|-------|-------|-------|-------|------------------------------------------------------------|
| PF3D7_0923600 | PVVCY_0802200 | 2.445 | 3.739 | 3.545 | 2.369 | lipoate-protein ligase 2, putative                         |
| PF3D7_0304300 | PVVCY_0400350 | 4.423 | 4.965 | 5.155 | 4.326 | conserved Plasmodium protein, unknown function             |
| PF3D7_0808100 | PVVCY_1202350 | 5.251 | 5.217 | 4.968 | 4.317 | AP-3 complex subunit delta, putative                       |
| PF3D7_0616100 | PVVCY_1101650 | 4.835 | 4.928 | 4.330 | 4.840 | conserved Plasmodium protein, unknown function             |
| PF3D7_1107400 | PVVCY_0900680 | 5.688 | 5.881 | 7.611 | 7.496 | DNA repair protein RAD51, putative                         |
| PF3D7_1034500 | PVVCY_0501880 | 4.224 | 5.056 | 4.924 | 3.938 | conserved Plasmodium protein, unknown function             |
| PF3D7_1032800 | PVVCY_0501710 | 6.706 | 6.937 | 6.453 | 5.496 | leucine-rich repeat protein                                |
| PF3D7_1212100 | PVVCY_0601070 | 5.563 | 5.475 | 5.511 | 5.808 | peripheral plastid protein 1, putative                     |
| PF3D7_1324500 | PVVCY_1304230 | 3.014 | 4.518 | 5.018 | 3.959 | DEAD box helicase, putative                                |
| PF3D7_1343400 | PVVCY_1305950 | 5.584 | 5.668 | 5.505 | 4.552 | DNA repair protein RAD5, putative                          |
| PF3D7_1443600 | PVVCY_1300920 | 3.391 | 4.921 | 5.496 | 4.574 | gamma-tubulin complex component, putative                  |
| PF3D7_1034800 | PVVCY_0501910 | 5.488 | 6.103 | 5.743 | 4.369 | conserved Plasmodium protein, unknown function             |
| PF3D7_1335700 | PVVCY_1305230 | 5.411 | 5.379 | 5.292 | 4.795 | conserved Plasmodium protein, unknown function             |
| PF3D7_1324500 | PVVCY_1304230 | 3.014 | 4.518 | 5.018 | 3.959 | DEAD box helicase, putative                                |
| PF3D7_1303800 | PVVCY_1400400 | 1.213 | 1.428 | 3.383 | 3.603 | conserved Plasmodium protein, unknown function             |
| PF3D7_1428900 | PVVCY_1002070 | 3.845 | 3.736 | 5.998 | 6.402 | conserved Plasmodium protein, unknown function             |
| PF3D7_1201700 | PVVCY_0600090 | 0.704 | 0.000 | 0.831 | 0.435 | conserved Plasmodium protein, unknown function             |
| PF3D7_1131400 | PVVCY_0903020 | 3.963 | 4.022 | 2.891 | 2.103 | conserved Plasmodium protein, unknown function             |
| PF3D7_1353800 | PVVCY_1103150 | 8.736 | 9.684 | 9.664 | 8.625 | proteasome subunit alpha type-4, putative                  |
| PF3D7_1456500 | PVVCY_1302170 | 3.782 | 4.062 | 6.114 | 6.296 | conserved Plasmodium protein, unknown function             |
| PF3D7_1333900 | PVVCY_1305130 | 3.526 | 4.862 | 6.013 | 5.748 | conserved Plasmodium protein, unknown function             |
| PF3D7_1131200 | PVVCY_0903000 | 1.435 | 0.540 | 1.068 | 1.894 | conserved Plasmodium protein, unknown function             |
| PF3D7_1127100 | PVVCY_0902510 | 5.940 | 8.385 | 9.612 | 8.941 | deoxyuridine 5'-triphosphate nucleotidohydrolase, putative |
| PF3D7_1106100 | PVVCY_0900550 | 5.947 | 6.668 | 7.136 | 6.725 | apicoplast ribosomal protein S15 precursor, putative       |
| PF3D7_0815400 | PVVCY_0701520 | 5.435 | 6.656 | 7.562 | 6.974 | conserved Plasmodium protein, unknown function             |
| PF3D7_0313700 | PVVCY_0401250 | 5.011 | 5.857 | 6.558 | 6.059 | conserved Plasmodium protein, unknown function             |
| PF3D7_0630300 | PVVCY_1103020 | 2.375 | 3.561 | 5.515 | 5.201 | DNA polymerase epsilon catalytic subunit A, putative       |
| PF3D7_1217000 | PVVCY_1403470 | 3.828 | 4.373 | 4.274 | 3.128 | conserved Plasmodium protein, unknown function             |
| PF3D7_0715700 | PVVCY_1402380 | 5.637 | 5.370 | 5.391 | 4.583 | conserved Plasmodium protein, unknown function             |
| PF3D7_0718100 | PVVCY_0601610 | 3.154 | 3.911 | 5.895 | 5.934 | exported serine/threonine protein kinase, putative         |
| PF3D7_0727400 | PVVCY_0201120 | 8.695 | 9.322 | 9.533 | 8.291 | proteasome subunit alpha type-5, putative                  |
| PF3D7_0307600 | PVVCY_0400660 | 2.164 | 3.028 | 4.499 | 4.850 | conserved Plasmodium protein, unknown function             |
| PF3D7_0630300 | PVVCY_1103020 | 2.375 | 3.561 | 5.515 | 5.201 | DNA polymerase epsilon catalytic subunit A, putative       |
| PF3D7_1329200 | PVVCY_1304690 | 3.097 | 2.661 | 2.421 | 3.156 | conserved Plasmodium protein, unknown function             |
| PF3D7_0211900 | PVVCY_0300970 | 4.359 | 4.998 | 5.022 | 4.611 | conserved Plasmodium protein, unknown function             |

|               |               |        |        |        |       |                                                                     |
|---------------|---------------|--------|--------|--------|-------|---------------------------------------------------------------------|
| PF3D7_1319700 | PVVCY_1401970 | 5.234  | 6.395  | 6.804  | 6.053 | protein phosphatase PP2A regulatory subunit A, putative             |
| PF3D7_0727500 | PVVCY_0201130 | 3.792  | 4.324  | 5.013  | 4.588 | conserved Plasmodium protein, unknown function                      |
| PF3D7_0219600 | PVVCY_0301690 | 4.371  | 5.263  | 7.063  | 7.049 | replication factor C subunit 1, putative                            |
| PF3D7_0917000 | PVVCY_0801540 | 3.411  | 3.505  | 5.909  | 6.287 | merozoite organizing protein, putative                              |
| PF3D7_0307600 | PVVCY_0400660 | 2.164  | 3.028  | 4.499  | 4.850 | conserved Plasmodium protein, unknown function                      |
| PF3D7_0218000 | PVVCY_0301560 | 5.420  | 6.952  | 8.016  | 7.698 | replication factor C subunit 2, putative                            |
| PF3D7_0703200 | PVVCY_1000220 | 3.909  | 4.680  | 5.903  | 5.649 | conserved Plasmodium protein, unknown function                      |
| PF3D7_0931800 | PVVCY_0803020 | 8.480  | 9.513  | 9.243  | 8.556 | proteasome subunit beta type-6, putative                            |
| PF3D7_0827500 | PVVCY_0700310 | 6.853  | 7.217  | 7.319  | 7.011 | apicoplast ribosomal protein L21 precursor, putative                |
| PF3D7_0417200 | PVVCY_0701900 | 5.023  | 7.045  | 7.736  | 6.676 | bifunctional dihydrofolate reductase-thymidylate synthase, putative |
| PF3D7_0315400 | PVVCY_0401430 | 7.599  | 7.963  | 8.154  | 8.142 | conserved Plasmodium protein, unknown function                      |
| PF3D7_0415200 | PVVCY_0701700 | 2.497  | 3.324  | 5.195  | 5.335 | conserved Plasmodium protein, unknown function                      |
| PF3D7_1201800 | PVVCY_0600100 | 4.225  | 4.683  | 4.788  | 4.232 | cytochrome c oxidase assembly protein COX19, putative               |
| PF3D7_0313700 | PVVCY_0401250 | 5.011  | 5.857  | 6.558  | 6.059 | conserved Plasmodium protein, unknown function                      |
| PF3D7_1334100 | PVVCY_1305150 | 4.014  | 3.825  | 5.219  | 5.590 | conserved Plasmodium protein, unknown function                      |
| PF3D7_1360000 | PVVCY_1103740 | 6.203  | 7.830  | 8.787  | 7.820 | conserved Plasmodium protein, unknown function                      |
| PF3D7_1406300 | PVVCY_1004130 | 8.388  | 8.420  | 8.355  | 8.522 | glycerophosphodiester phosphodiesterase, putative                   |
| PF3D7_1148000 | PVVCY_0904620 | 3.278  | 3.631  | 6.601  | 6.623 | serine threonine protein kinase, putative                           |
| PF3D7_0620100 | PVVCY_1102010 | 6.725  | 8.062  | 8.608  | 7.805 | conserved Plasmodium protein, unknown function                      |
| PF3D7_1361900 | PVVCY_1103900 | 7.007  | 9.275  | 10.438 | 9.776 | proliferating cell nuclear antigen 1, putative                      |
| PF3D7_1032800 | PVVCY_0501710 | 6.706  | 6.937  | 6.453  | 5.496 | leucine-rich repeat protein                                         |
| PF3D7_1239800 | PVVCY_1405640 | 2.799  | 2.474  | 4.939  | 5.567 | conserved Plasmodium protein, unknown function                      |
| PF3D7_1147700 | PVVCY_0904590 | 6.247  | 6.986  | 7.647  | 6.839 | mitochondrial ATP synthase delta subunit, putative                  |
| PF3D7_0718100 | PVVCY_0601610 | 3.154  | 3.911  | 5.895  | 5.934 | exported serine/threonine protein kinase, putative                  |
| PF3D7_0727400 | PVVCY_0201120 | 8.695  | 9.322  | 9.533  | 8.291 | proteasome subunit alpha type-5, putative                           |
| PF3D7_0217400 | PVVCY_0301500 | 7.025  | 6.692  | 6.813  | 6.571 | conserved Plasmodium protein, unknown function                      |
| PF3D7_1406700 | PVVCY_1004090 | 6.834  | 7.824  | 7.950  | 6.883 | vacuolar protein sorting-associated protein 29, putative            |
| PF3D7_0503200 | PVVCY_1100380 | 2.698  | 2.383  | 4.950  | 5.518 | conserved Plasmodium protein, unknown function                      |
| PF3D7_1470800 | PVVCY_1303650 | 5.190  | 5.375  | 5.752  | 5.230 | conserved Plasmodium protein, unknown function                      |
| PF3D7_0520900 | PVVCY_1203650 | 10.604 | 10.578 | 9.869  | 8.869 | adenosylhomocysteinase, putative                                    |
| PF3D7_1338100 | PVVCY_1305460 | 8.260  | 9.014  | 9.225  | 8.136 | 26S proteasome regulatory subunit RPN3, putative                    |
| PF3D7_0703000 | PVVCY_1000200 | 4.852  | 4.593  | 5.243  | 4.895 | conserved Plasmodium protein, unknown function                      |
| PF3D7_1104300 | PVVCY_0900360 | 6.026  | 5.913  | 5.440  | 5.319 | conserved Plasmodium protein, unknown function                      |
| PF3D7_1474900 | PVVCY_1300290 | 7.563  | 7.515  | 7.855  | 7.406 | trailer hitch homolog, putative                                     |

|               |               |       |       |       |       |                                                             |
|---------------|---------------|-------|-------|-------|-------|-------------------------------------------------------------|
| PF3D7_1345900 | PVVCY_1306190 | 4.390 | 5.354 | 7.519 | 7.516 | kinetochore protein SPC25, putative                         |
| PF3D7_1369400 | PVVCY_1104630 | 3.723 | 3.918 | 4.003 | 3.584 | conserved Plasmodium protein, unknown function              |
| PF3D7_0415200 | PVVCY_0701700 | 2.497 | 3.324 | 5.195 | 5.335 | conserved Plasmodium protein, unknown function              |
| PF3D7_0828400 | PVVCY_0700220 | 4.883 | 5.753 | 5.581 | 4.451 | mitochondrial inner membrane protein OXA1, putative         |
| PF3D7_1439700 | PVVCY_1300540 | 7.698 | 8.020 | 7.534 | 6.964 | leucine carboxyl methyltransferase, putative                |
| PF3D7_1329200 | PVVCY_1304690 | 3.097 | 2.661 | 2.421 | 3.156 | conserved Plasmodium protein, unknown function              |
| PF3D7_1452900 | PVVCY_1301820 | 4.949 | 5.962 | 5.765 | 5.231 | conserved Plasmodium protein, unknown function              |
| PF3D7_1441800 | PVVCY_1300740 | 4.585 | 4.928 | 5.018 | 4.762 | vacuolar-sorting protein SNF7, putative                     |
| PF3D7_1214000 | PVVCY_1403180 | 8.132 | 8.462 | 7.815 | 7.217 | conserved Plasmodium protein, unknown function              |
| PF3D7_1429100 | PVVCY_1002050 | 5.959 | 6.767 | 6.948 | 6.513 | apicoplast ribosomal protein L15 precursor, putative        |
| PF3D7_0210200 | PVVCY_0300810 | 3.464 | 4.285 | 6.096 | 6.259 | conserved Plasmodium protein, unknown function              |
| PF3D7_0416000 | PVVCY_0701770 | 7.002 | 6.640 | 7.110 | 6.600 | RNA-binding protein, putative                               |
| PF3D7_1345400 | PVVCY_1306140 | 3.889 | 3.866 | 6.349 | 6.768 | conserved Plasmodium protein, unknown function              |
| PF3D7_1324500 | PVVCY_1304230 | 3.014 | 4.518 | 5.018 | 3.959 | DEAD box helicase, putative                                 |
| PF3D7_0715900 | PVVCY_1402400 | 7.271 | 7.542 | 7.246 | 6.570 | cation diffusion facilitator family protein, putative       |
| PF3D7_0523600 | PVVCY_1203910 | 4.750 | 5.541 | 7.212 | 7.458 | conserved Plasmodium protein, unknown function              |
| PF3D7_0726600 | PVVCY_0201050 | 3.889 | 4.974 | 5.738 | 5.358 | conserved Plasmodium protein, unknown function              |
| PF3D7_1029800 | PVVCY_0501430 | 5.407 | 6.183 | 6.210 | 4.890 | RAP protein, putative                                       |
| PF3D7_1356400 | PVVCY_1103390 | 3.948 | 4.526 | 5.224 | 4.787 | phosphatase 2A regulatory subunit-related protein, putative |
| PF3D7_1405600 | PVVCY_1004200 | 6.717 | 8.574 | 9.640 | 9.121 | ribonucleotide reductase small subunit, putative            |
| PF3D7_0820700 | PVVCY_0700990 | 5.932 | 5.844 | 6.726 | 7.015 | 2-oxoglutarate dehydrogenase E1 component, putative         |
| PF3D7_1406600 | PVVCY_1004100 | 6.301 | 5.965 | 5.877 | 5.475 | ATP-dependent Clp protease, putative                        |
| PF3D7_0213000 | PVVCY_0301080 | 5.943 | 6.910 | 6.678 | 5.568 | conserved Plasmodium protein, unknown function              |
| PF3D7_1366800 | PVVCY_1104370 | 5.634 | 5.551 | 7.282 | 7.368 | phosphatidylserine synthase, putative                       |
| PF3D7_1203300 | PVVCY_0600250 | 4.786 | 5.772 | 6.060 | 5.419 | conserved Plasmodium protein, unknown function              |
| PF3D7_0727400 | PVVCY_0201120 | 8.695 | 9.322 | 9.533 | 8.291 | proteasome subunit alpha type-5, putative                   |
| PF3D7_1427000 | PVVCY_1002250 | 4.553 | 4.800 | 5.204 | 4.710 | conserved Plasmodium protein, unknown function              |
| PF3D7_0728600 | PVVCY_0201240 | 5.198 | 5.860 | 5.150 | 4.489 | zinc finger protein, putative                               |
| PF3D7_0912400 | PVVCY_1001520 | 6.502 | 6.949 | 7.816 | 7.692 | alkaline phosphatase, putative                              |
| PF3D7_1441500 | PVVCY_1300710 | 2.753 | 3.983 | 5.080 | 5.387 | conserved Plasmodium protein, unknown function              |
| PF3D7_0828400 | PVVCY_0700220 | 4.883 | 5.753 | 5.581 | 4.451 | mitochondrial inner membrane protein OXA1, putative         |
| PF3D7_1208900 | PVVCY_0600770 | 5.987 | 6.604 | 8.061 | 7.658 | protein phosphatase, putative                               |
| PF3D7_1368700 | PVVCY_1104560 | 4.986 | 5.653 | 5.718 | 4.911 | mitochondrial carrier protein, putative                     |
| PF3D7_0918200 | PVVCY_0801660 | 7.040 | 7.749 | 7.894 | 6.937 | 50S ribosomal protein L3, apicoplast, putative              |
| PF3D7_0913600 | PVVCY_0801200 | 4.714 | 4.432 | 4.833 | 4.277 | conserved Plasmodium protein, unknown function              |

|               |               |       |       |       |       |                                                                      |
|---------------|---------------|-------|-------|-------|-------|----------------------------------------------------------------------|
| PF3D7_1427300 | PVVCY_1002220 | 3.891 | 3.694 | 5.761 | 6.358 | conserved Plasmodium protein, unknown function                       |
| PF3D7_1451300 | PVVCY_1301660 | 4.053 | 4.755 | 6.944 | 6.992 | E3 SUMO-protein ligase NSE2, putative                                |
| PF3D7_1034500 | PVVCY_0501880 | 4.224 | 5.056 | 4.924 | 3.938 | conserved Plasmodium protein, unknown function                       |
| PF3D7_0417200 | PVVCY_0701900 | 5.023 | 7.045 | 7.736 | 6.676 | bifunctional dihydrofolate reductase-thymidylate synthase, putative  |
| PF3D7_1345900 | PVVCY_1306190 | 4.390 | 5.354 | 7.519 | 7.516 | kinetochore protein SPC25, putative                                  |
| PF3D7_1362500 | PVVCY_1103960 | 3.642 | 4.350 | 3.788 | 3.035 | exonuclease, putative                                                |
| PF3D7_0709400 | PVVCY_1202080 | 4.272 | 4.858 | 5.500 | 5.480 | Cg7 protein, putative                                                |
| PF3D7_1412100 | PVVCY_1003590 | 4.795 | 6.348 | 7.333 | 6.697 | conserved Plasmodium protein, unknown function                       |
| PF3D7_1324500 | PVVCY_1304230 | 3.014 | 4.518 | 5.018 | 3.959 | DEAD box helicase, putative                                          |
| PF3D7_0417200 | PVVCY_0701900 | 5.023 | 7.045 | 7.736 | 6.676 | bifunctional dihydrofolate reductase-thymidylate synthase, putative  |
| PF3D7_0211300 | PVVCY_0300910 | 6.013 | 6.346 | 6.597 | 5.507 | ubiquinol-cytochrome-c reductase complex assembly factor 1, putative |
| PF3D7_0920200 | PVVCY_0801850 | 5.796 | 6.047 | 6.260 | 5.486 | CS domain protein, putative                                          |
| PF3D7_1142800 | PVVCY_0904110 | 5.978 | 6.791 | 7.078 | 6.705 | conserved Plasmodium protein, unknown function                       |
| PF3D7_0106900 | PVVCY_0200620 | 5.254 | 5.444 | 5.050 | 4.407 | 2-C-methyl-D-erythritol 4-phosphate cytidyltransferase, putative     |
| PF3D7_0505500 | PVVCY_1100600 | 5.650 | 5.871 | 7.167 | 6.870 | DNA mismatch repair protein MSH6, putative                           |
| PF3D7_1330200 | PVVCY_1304790 | 4.932 | 5.541 | 5.608 | 5.296 | conserved Plasmodium protein, unknown function                       |
| PF3D7_1413400 | PVVCY_1003470 | 4.990 | 5.871 | 6.302 | 5.999 | 30S ribosomal protein S9, putative                                   |
| PF3D7_0720900 | PVVCY_0601870 | 6.750 | 7.845 | 8.332 | 7.783 | conserved Plasmodium protein, unknown function                       |
| PF3D7_0715900 | PVVCY_1402400 | 7.271 | 7.542 | 7.246 | 6.570 | cation diffusion facilitator family protein, putative                |
| PF3D7_1471200 | PVVCY_1303690 | 8.216 | 7.641 | 7.537 | 7.616 | inorganic anion antiporter, putative                                 |
| PF3D7_0615300 | PVVCY_1203100 | 3.125 | 3.693 | 3.872 | 3.362 | GPI-anchored wall transfer protein 1, putative                       |
| PF3D7_0403600 | PVVCY_0800160 | 3.527 | 4.557 | 6.936 | 7.042 | conserved Plasmodium protein, unknown function                       |
| PF3D7_0515300 | PVVCY_1101580 | 6.232 | 6.348 | 5.871 | 5.510 | phosphatidylinositol 3-kinase, putative                              |
| PF3D7_1015400 | PVVCY_1201460 | 4.872 | 5.743 | 6.225 | 5.313 | conserved Plasmodium protein, unknown function                       |
| PF3D7_0315000 | PVVCY_0401390 | 3.413 | 5.327 | 6.117 | 6.044 | zinc finger protein, putative                                        |
| PF3D7_1345400 | PVVCY_1306140 | 3.889 | 3.866 | 6.349 | 6.768 | conserved Plasmodium protein, unknown function                       |
| PF3D7_1330100 | PVVCY_1304780 | 5.922 | 6.025 | 6.459 | 5.944 | conserved Plasmodium protein, unknown function                       |
| PF3D7_1245000 | PVVCY_1406030 | 1.683 | 2.445 | 3.517 | 3.708 | conserved Plasmodium protein, unknown function                       |
| PF3D7_0820800 | PVVCY_0700980 | 5.676 | 6.168 | 6.135 | 5.418 | conserved Plasmodium protein, unknown function                       |
| PF3D7_0931400 | PVVCY_0802980 | 5.411 | 6.633 | 6.022 | 5.851 | conserved Plasmodium protein, unknown function                       |
| PF3D7_1446900 | PVVCY_1301230 | 3.843 | 4.090 | 4.853 | 5.059 | glutaminyl-peptide cyclotransferase, putative                        |
| PF3D7_0603100 | PVVCY_0100330 | 7.017 | 7.284 | 7.518 | 6.656 | RNA-binding protein, putative                                        |
| PF3D7_1427300 | PVVCY_1002220 | 3.891 | 3.694 | 5.761 | 6.358 | conserved Plasmodium protein, unknown function                       |
| PF3D7_0304300 | PVVCY_0400350 | 4.423 | 4.965 | 5.155 | 4.326 | conserved Plasmodium protein, unknown function                       |
| PF3D7_1303200 | PVVCY_1400340 | 6.751 | 6.904 | 6.437 | 5.510 | SNARE protein, putative                                              |

|               |               |        |       |       |       |                                                                   |
|---------------|---------------|--------|-------|-------|-------|-------------------------------------------------------------------|
| PF3D7_0212000 | PVVCY_0300980 | 4.472  | 5.384 | 5.747 | 5.045 | GDP-fructose:GMP antiporter, putative                             |
| PF3D7_1122100 | PVVCY_0902010 | 3.326  | 5.576 | 6.249 | 5.377 | GPI transamidase component GPI16, putative                        |
| PF3D7_0312400 | PVVCY_0401120 | 4.735  | 4.186 | 7.328 | 7.640 | glycogen synthase kinase 3, putative                              |
| PF3D7_0625300 | PVVCY_1102540 | 4.600  | 5.236 | 5.865 | 5.868 | DNA polymerase 1, putative                                        |
| PF3D7_1022800 | PVVCY_0500750 | 6.272  | 6.188 | 6.720 | 5.978 | 4-hydroxy-3-methylbut-2-en-1-yl diphosphate synthase, putative    |
| PF3D7_0403100 | PVVCY_0800100 | 6.387  | 6.736 | 6.320 | 5.380 | regulator of chromosome condensation, putative                    |
| PF3D7_0212000 | PVVCY_0300980 | 4.472  | 5.384 | 5.747 | 5.045 | GDP-fructose:GMP antiporter, putative                             |
| PF3D7_1345400 | PVVCY_1306140 | 3.889  | 3.866 | 6.349 | 6.768 | conserved Plasmodium protein, unknown function                    |
| PF3D7_0208500 | PVVCY_0300660 | 6.823  | 6.253 | 5.828 | 5.509 | acyl carrier protein, putative                                    |
| PF3D7_1226600 | PVVCY_1404350 | 5.314  | 7.006 | 8.740 | 8.623 | proliferating cell nuclear antigen 2, putative                    |
| PF3D7_0525700 | PVVCY_1204120 | 5.965  | 6.358 | 6.738 | 5.309 | conserved Plasmodium protein, unknown function                    |
| PF3D7_0820700 | PVVCY_0700990 | 5.932  | 5.844 | 6.726 | 7.015 | 2-oxoglutarate dehydrogenase E1 component, putative               |
| PF3D7_0811900 | PVVCY_1402750 | 4.623  | 5.199 | 5.724 | 5.382 | RNA-binding protein, putative                                     |
| PF3D7_1364900 | PVVCY_1104180 | 2.341  | 3.008 | 2.191 | 2.123 | ferrochelatase, putative                                          |
| PF3D7_1415000 | PVVCY_1003300 | 3.219  | 3.009 | 5.877 | 6.326 | uracil-DNA glycosylase, putative                                  |
| PF3D7_0108000 | PVVCY_0200520 | 8.969  | 9.682 | 9.692 | 8.686 | proteasome subunit beta type-3, putative                          |
| PF3D7_0930100 | PVVCY_0802850 | 6.269  | 6.603 | 6.644 | 5.515 | conserved Plasmodium protein, unknown function                    |
| PF3D7_1228500 | PVVCY_1404530 | 5.986  | 6.613 | 5.948 | 5.133 | RNA pseudouridylate synthase, putative                            |
| PF3D7_0713600 | PVVCY_1402170 | 5.132  | 5.972 | 6.000 | 4.933 | mitochondrial ribosomal protein S5 precursor, putative            |
| PF3D7_1363500 | PVVCY_1104060 | 5.121  | 5.443 | 5.527 | 5.379 | conserved Plasmodium protein, unknown function                    |
| PF3D7_1015800 | PVVCY_1201500 | 7.074  | 8.481 | 9.821 | 9.684 | ribonucleotide reductase small subunit, putative                  |
| PF3D7_0215800 | PVVCY_0301340 | 4.066  | 3.831 | 6.533 | 6.808 | origin recognition complex subunit 5, putative                    |
| PF3D7_1467300 | PVVCY_1303310 | 5.519  | 6.442 | 6.425 | 5.044 | 1-deoxy-D-xylulose 5-phosphate reductoisomerase, putative         |
| PF3D7_0917500 | PVVCY_0801590 | 3.923  | 4.638 | 7.004 | 6.945 | conserved Plasmodium protein, unknown function                    |
| PF3D7_1014300 | PVVCY_1201350 | 6.025  | 6.667 | 6.188 | 4.941 | conserved Plasmodium protein, unknown function                    |
| PF3D7_0933500 | PVVCY_0803190 | 2.998  | 4.028 | 5.728 | 5.483 | gamma-tubulin complex component, putative                         |
| PF3D7_0922200 | PVVCY_0802060 | 10.157 | 9.420 | 8.521 | 9.508 | S-adenosylmethionine synthetase, putative                         |
| PF3D7_0811900 | PVVCY_1402750 | 4.623  | 5.199 | 5.724 | 5.382 | RNA-binding protein, putative                                     |
| PF3D7_1432700 | PVVCY_1001700 | 7.546  | 8.256 | 7.963 | 6.725 | protein-L-isoaspartate(D-aspartate) O-methyltransferase, putative |
| PF3D7_0105900 | PVVCY_0200720 | 4.357  | 4.279 | 3.762 | 3.632 | DNA binding protein, putative                                     |
| PF3D7_1330700 | PVVCY_1304840 | 2.359  | 3.346 | 4.402 | 3.485 | GPI transamidase subunit PIG-U, putative                          |
| PF3D7_1345500 | PVVCY_1306150 | 5.736  | 6.275 | 6.626 | 5.640 | ubiquitin-conjugating enzyme E2, putative                         |
| PF3D7_1242500 | PVVCY_1405800 | 5.770  | 6.313 | 6.089 | 5.351 | conserved Plasmodium protein, unknown function                    |
| PF3D7_0217100 | PVVCY_0301470 | 5.028  | 6.521 | 7.915 | 7.454 | ATP synthase F1, alpha subunit, putative                          |
| PF3D7_1409100 | PVVCY_1003880 | 5.179  | 5.970 | 6.658 | 6.116 | aldo-keto reductase, putative                                     |
| PF3D7_0811900 | PVVCY_1402750 | 4.623  | 5.199 | 5.724 | 5.382 | RNA-binding protein, putative                                     |
| PF3D7_1221800 | PVVCY_1403900 | 5.635  | 6.171 | 6.814 | 6.285 | conserved Plasmodium protein, unknown function                    |

|               |               |        |        |        |        |                                                                                       |
|---------------|---------------|--------|--------|--------|--------|---------------------------------------------------------------------------------------|
| PF3D7_0307400 | PVVCY_0400640 | 6.342  | 6.655  | 5.927  | 5.521  | ATP-dependent Clp protease proteolytic subunit, putative                              |
| PF3D7_0933500 | PVVCY_0803190 | 2.998  | 4.028  | 5.728  | 5.483  | gamma-tubulin complex component, putative                                             |
| PF3D7_0709100 | PVVCY_1202050 | 6.289  | 6.360  | 5.925  | 5.402  | cg1 protein, putative                                                                 |
| PF3D7_0508800 | PVVCY_1100930 | 7.176  | 7.572  | 7.483  | 6.929  | single-stranded DNA-binding protein, putative                                         |
| PF3D7_0625300 | PVVCY_1102540 | 4.600  | 5.236  | 5.865  | 5.868  | DNA polymerase 1, putative                                                            |
| PF3D7_0809400 | PVVCY_1403000 | 6.071  | 6.170  | 5.645  | 4.913  | conserved Plasmodium protein, unknown function                                        |
| PF3D7_1332600 | PVVCY_1305010 | 5.015  | 5.283  | 5.746  | 5.514  | apurinic_apyrimidinic endonuclease Apn1, putative                                     |
| PF3D7_0316200 | PVVCY_0401510 | 3.659  | 4.900  | 5.017  | 4.147  | conserved Plasmodium protein, unknown function                                        |
| PF3D7_1305100 | PVVCY_1400530 | 5.641  | 6.470  | 6.499  | 6.188  | conserved Plasmodium protein, unknown function                                        |
| PF3D7_1032400 | PVVCY_0501670 | 3.405  | 4.281  | 6.080  | 6.042  | phosphatidylinositol N-acetylglucosaminyltransferase subunit A, putative              |
| PF3D7_0307500 | PVVCY_0400650 | 4.064  | 4.624  | 7.066  | 7.540  | conserved protein, unknown function                                                   |
| PF3D7_1350400 | PVVCY_1306620 | 5.153  | 5.614  | 5.150  | 4.232  | ubiquitin-activating enzyme E1, putative                                              |
| PF3D7_1130500 | PVVCY_0902930 | 5.074  | 5.339  | 4.827  | 4.577  | conserved oligomeric Golgi complex subunit 2, putative                                |
| PF3D7_1011000 | PVVCY_1201020 | 5.936  | 5.384  | 5.128  | 6.261  | inner membrane complex sub-compartment protein 1, putative                            |
| PF3D7_1004200 | PVVCY_1200310 | 6.068  | 5.715  | 5.469  | 5.338  | WD repeat-containing protein, putative                                                |
| PF3D7_1024500 | PVVCY_0500920 | 5.343  | 6.164  | 5.499  | 4.887  | conserved Plasmodium protein, unknown function                                        |
| PF3D7_0725000 | PVVCY_0602290 | 3.600  | 3.027  | 5.617  | 5.928  | exonuclease I, putative                                                               |
| PF3D7_0511800 | PVVCY_1101220 | 10.780 | 10.379 | 10.169 | 10.571 | inositol-3-phosphate synthase, putative                                               |
| PF3D7_1032400 | PVVCY_0501670 | 3.405  | 4.281  | 6.080  | 6.042  | phosphatidylinositol N-acetylglucosaminyltransferase subunit A, putative              |
| PF3D7_1004700 | PVVCY_1200360 | 2.808  | 4.058  | 4.913  | 4.409  | conserved Plasmodium protein, unknown function                                        |
| PF3D7_1226600 | PVVCY_1404350 | 5.314  | 7.006  | 8.740  | 8.623  | proliferating cell nuclear antigen 2, putative                                        |
| PF3D7_1144700 | PVVCY_0904300 | 5.059  | 5.379  | 5.775  | 5.083  | apicoplast import protein Tic20, putative                                             |
| PF3D7_0925300 | PVVCY_0802360 | 5.350  | 5.459  | 5.797  | 5.684  | proline--tRNA ligase, putative                                                        |
| PF3D7_1215200 | PVVCY_1403300 | 6.076  | 7.157  | 6.763  | 5.243  | peptidyl-prolyl cis-trans isomerase, putative                                         |
| PF3D7_0729600 | PVVCY_0201340 | 6.814  | 7.405  | 6.986  | 6.480  | conserved Plasmodium protein, unknown function                                        |
| PF3D7_1368800 | PVVCY_1104570 | 3.238  | 4.258  | 4.944  | 4.096  | DNA repair endonuclease, putative                                                     |
| PF3D7_0416100 | PVVCY_0701790 | 5.424  | 5.230  | 5.356  | 5.021  | glutamyl-tRNA(Gln) amidotransferase subunit A, putative                               |
| PF3D7_0804400 | PVVCY_1202720 | 5.969  | 6.630  | 7.012  | 6.207  | methionine aminopeptidase 1c, putative                                                |
| PF3D7_1338600 | PVVCY_1305510 | 6.008  | 6.545  | 6.802  | 5.970  | conserved Plasmodium protein, unknown function                                        |
| PF3D7_0509000 | PVVCY_1100950 | 7.458  | 7.654  | 7.575  | 6.849  | SNAP protein, putative                                                                |
| PF3D7_0412000 | PVVCY_0601360 | 3.614  | 4.855  | 7.073  | 6.689  | conserved Plasmodium protein, unknown function                                        |
| PF3D7_1417800 | PVVCY_1003020 | 5.457  | 7.067  | 9.028  | 8.367  | DNA replication licensing factor MCM2, putative DNA replication licensing factor MCM2 |
| PF3D7_0216400 | PVVCY_0301400 | 6.688  | 6.885  | 6.150  | 5.968  | vacuolar protein sorting-associated protein 45, putative                              |
| PF3D7_1008700 | PVVCY_1200770 | 8.579  | 9.632  | 10.799 | 10.038 | tubulin beta chain, putative                                                          |

|               |               |        |       |       |       |                                                                                |
|---------------|---------------|--------|-------|-------|-------|--------------------------------------------------------------------------------|
| PF3D7_0905000 | PVVCY_0401750 | 4.333  | 6.047 | 6.419 | 6.179 | conserved Plasmodium protein, unknown function                                 |
| PF3D7_1341600 | PVVCY_1305780 | 4.016  | 4.571 | 4.630 | 3.792 | GPI mannosyltransferase 3, putative                                            |
| PF3D7_0904400 | PVVCY_0401810 | 8.937  | 8.718 | 8.375 | 8.509 | signal peptidase complex subunit 3, putative                                   |
| PF3D7_0107400 | PVVCY_0200580 | 6.071  | 7.622 | 8.353 | 7.681 | conserved Plasmodium protein, unknown function                                 |
| PF3D7_1229600 | PVVCY_1404630 | 4.902  | 5.768 | 6.214 | 6.123 | conserved Plasmodium protein, unknown function                                 |
| PF3D7_1011000 | PVVCY_1201020 | 5.936  | 5.384 | 5.128 | 6.261 | inner membrane complex sub-compartment protein 1, putative                     |
| PF3D7_1147600 | PVVCY_0904580 | 3.636  | 4.075 | 5.014 | 4.686 | conserved Plasmodium protein, unknown function                                 |
| PF3D7_1323300 | PVVCY_1304110 | 3.709  | 4.836 | 4.947 | 4.735 | acetyltransferase, GNAT family, putative                                       |
| PF3D7_1130500 | PVVCY_0902930 | 5.074  | 5.339 | 4.827 | 4.577 | conserved oligomeric Golgi complex subunit 2, putative                         |
| PF3D7_0925300 | PVVCY_0802360 | 5.350  | 5.459 | 5.797 | 5.684 | proline--tRNA ligase, putative                                                 |
| PF3D7_0826900 | PVVCY_0700370 | 3.048  | 2.471 | 5.090 | 5.743 | conserved Plasmodium protein, unknown function                                 |
| PF3D7_0503200 | PVVCY_1100380 | 2.698  | 2.383 | 4.950 | 5.518 | conserved Plasmodium protein, unknown function                                 |
| PF3D7_1343500 | PVVCY_1305960 | 7.484  | 7.826 | 7.730 | 6.857 | conserved Plasmodium protein, unknown function                                 |
| PF3D7_1413500 | PVVCY_1003460 | 5.185  | 5.556 | 5.325 | 4.467 | FeS assembly ATPase SufC, putative ABC transporter I family member 1, putative |
| PF3D7_0208100 | PVVCY_0300620 | 3.859  | 5.491 | 6.413 | 5.529 | conserved Plasmodium protein, unknown function                                 |
| PF3D7_1203000 | PVVCY_0600220 | 4.233  | 4.273 | 6.003 | 6.535 | origin recognition complex subunit 1, putative                                 |
| PF3D7_0708900 | PVVCY_1202030 | 7.472  | 7.375 | 6.892 | 6.455 | Cg3 protein, putative                                                          |
| PF3D7_1432700 | PVVCY_1001700 | 7.546  | 8.256 | 7.963 | 6.725 | protein-L-isoaspartate(D-aspartate) O-methyltransferase, putative              |
| PF3D7_0411900 | PVVCY_0601350 | 3.687  | 4.277 | 6.877 | 6.840 | DNA polymerase alpha catalytic subunit A, putative                             |
| PF3D7_0922200 | PVVCY_0802060 | 10.157 | 9.420 | 8.521 | 9.508 | S-adenosylmethionine synthetase, putative                                      |
| PF3D7_1334000 | PVVCY_1305140 | 2.538  | 2.368 | 4.431 | 5.187 | conserved Plasmodium protein, unknown function                                 |
| PF3D7_1347100 | PVVCY_1306310 | 5.346  | 6.085 | 6.019 | 5.064 | DNA topoisomerase 3, putative                                                  |
| PF3D7_0934400 | PVVCY_0803280 | 7.839  | 8.939 | 8.799 | 7.806 | transcription factor with AP2 domain(s), putative                              |
| PF3D7_0204900 | PVVCY_0300360 | 5.543  | 6.303 | 5.692 | 4.679 | methyltransferase, putative                                                    |
| PF3D7_0509100 | PVVCY_1100960 | 4.081  | 3.970 | 6.214 | 6.869 | structural maintenance of chromosomes protein 4, putative                      |
| PF3D7_1141400 | PVVCY_0903980 | 3.284  | 4.687 | 6.340 | 6.515 | phosphatidylinositol N-acetylglucosaminyltransferase subunit H, putative       |
| PF3D7_1305600 | PVVCY_1400580 | 4.335  | 5.467 | 6.422 | 5.988 | membrane integral peptidase, M50 family, putative                              |
| PF3D7_1319400 | PVVCY_1401940 | 4.488  | 4.955 | 7.031 | 7.618 | conserved Plasmodium protein, unknown function                                 |
| PF3D7_1338700 | PVVCY_1305520 | 5.696  | 4.907 | 7.816 | 8.265 | conserved Plasmodium protein, unknown function                                 |
| PF3D7_1343400 | PVVCY_1305950 | 5.584  | 5.668 | 5.505 | 4.552 | DNA repair protein RAD5, putative                                              |
| PF3D7_0217900 | PVVCY_0301550 | 5.927  | 5.928 | 4.735 | 4.988 | conserved Plasmodium protein, unknown function                                 |
| PF3D7_0709200 | PVVCY_1202060 | 5.669  | 6.008 | 5.700 | 4.816 | glutaredoxin-like protein                                                      |
| PF3D7_1305000 | PVVCY_1400520 | 3.883  | 4.022 | 7.196 | 7.252 | conserved Plasmodium protein, unknown function                                 |

|               |               |       |       |       |       |                                                          |
|---------------|---------------|-------|-------|-------|-------|----------------------------------------------------------|
| PF3D7_1431600 | PVVCY_1001800 | 4.689 | 6.132 | 7.059 | 6.473 | succinyl-CoA ligase [ADP-forming] subunit beta, putative |
| PF3D7_1013600 | PVVCY_1201280 | 2.624 | 2.608 | 5.674 | 6.042 | conserved Plasmodium protein, unknown function           |
| PF3D7_0416300 | PVVCY_0701810 | 1.319 | 2.240 | 3.942 | 3.643 | DNA helicase MCM9, putative                              |
| PF3D7_0216500 | PVVCY_0301410 | 0.335 | 0.098 | 0.227 | 0.240 | conserved Plasmodium protein, unknown function           |
| PF3D7_0605300 | PVVCY_0100540 | 4.071 | 4.871 | 6.148 | 5.833 | serine threonine protein kinase, putative                |
| PF3D7_0509500 | PVVCY_1101000 | 2.096 | 2.322 | 4.955 | 5.119 | ERCC4 domain-containing protein, putative                |
| PF3D7_1364600 | PVVCY_1104160 | 5.115 | 5.377 | 5.973 | 5.388 | aldehyde reductase, putative                             |
| PF3D7_1025500 | PVVCY_0501020 | 1.269 | 0.740 | 0.922 | 1.266 | conserved Plasmodium protein, unknown function           |
| PF3D7_0603100 | PVVCY_0100330 | 7.017 | 7.284 | 7.518 | 6.656 | RNA-binding protein, putative                            |
| PF3D7_0320700 | PVVCY_1201870 | 8.861 | 8.850 | 8.197 | 8.241 | signal peptidase complex subunit SPC2, putative          |
| PF3D7_1338900 | PVVCY_1305540 | 5.760 | 6.129 | 5.979 | 4.670 | serine threonine protein kinase, putative                |
| PF3D7_0924300 | PVVCY_0802270 | 4.474 | 4.467 | 3.865 | 4.142 | thiamine pyrophosphokinase, putative                     |
| PF3D7_1141200 | PVVCY_0903960 | 5.657 | 6.932 | 7.805 | 7.008 | conserved Plasmodium protein, unknown function           |
| PF3D7_0918200 | PVVCY_0801660 | 7.040 | 7.749 | 7.894 | 6.937 | 50S ribosomal protein L3, apicoplast, putative           |
| PF3D7_0514100 | PVVCY_1101460 | 3.342 | 3.920 | 4.715 | 4.601 | ATP-dependent DNA helicase UvrD, putative                |
| PF3D7_1104300 | PVVCY_0900360 | 6.026 | 5.913 | 5.440 | 5.319 | conserved Plasmodium protein, unknown function           |
| PF3D7_1034200 | PVVCY_0501850 | 6.744 | 7.203 | 7.176 | 6.846 | apicoplast ribosomal protein L27 precursor, putative     |
| PF3D7_0304800 | PVVCY_0400390 | 5.336 | 5.018 | 3.770 | 3.574 | conserved Plasmodium membrane protein, unknown function  |
| PF3D7_1143500 | PVVCY_0904180 | 1.955 | 1.174 | 1.176 | 1.850 | conserved Plasmodium protein, unknown function           |
| PF3D7_1306400 | PVVCY_1400660 | 8.378 | 8.988 | 9.365 | 8.574 | 26S protease regulatory subunit 10B, putative            |
| PF3D7_0311800 | PVVCY_0401060 | 5.116 | 6.432 | 7.402 | 7.169 | conserved protein, unknown function                      |
| PF3D7_1319400 | PVVCY_1401940 | 4.488 | 4.955 | 7.031 | 7.618 | conserved Plasmodium protein, unknown function           |
| PF3D7_0828000 | PVVCY_0700260 | 5.441 | 5.110 | 4.218 | 5.198 | rhomboid protease ROM3, putative                         |
| PF3D7_1319400 | PVVCY_1401940 | 4.488 | 4.955 | 7.031 | 7.618 | conserved Plasmodium protein, unknown function           |
| PF3D7_1319400 | PVVCY_1401940 | 4.488 | 4.955 | 7.031 | 7.618 | conserved Plasmodium protein, unknown function           |
| PF3D7_1414000 | PVVCY_1003410 | 6.991 | 7.912 | 8.507 | 7.967 | 26S proteasome regulatory subunit RPN13, putative        |
| PF3D7_1419000 | PVVCY_1002910 | 3.556 | 2.921 | 6.236 | 6.960 | conserved Plasmodium protein, unknown function           |
| PF3D7_0530200 | PVVCY_1204560 | 7.691 | 7.656 | 7.371 | 6.539 | phosphoenolpyruvate_phosphate translocator, putative     |
| PF3D7_1348500 | PVVCY_1306440 | 8.206 | 8.048 | 6.969 | 6.615 | TBC domain protein, putative                             |
| PF3D7_1433800 | PVVCY_1001590 | 2.254 | 3.166 | 4.763 | 4.539 | conserved Plasmodium protein, unknown function           |
| PF3D7_0322300 | PVVCY_1201700 | 7.031 | 6.778 | 6.705 | 6.731 | diacylglycerol O-acyltransferase, putative               |
| PF3D7_1117100 | PVVCY_0901540 | 5.456 | 6.404 | 7.362 | 7.286 | deubiquinating_deneddylating enzyme, putative            |
| PF3D7_0317500 | PVVCY_1000940 | 3.533 | 2.709 | 5.160 | 5.611 | kinesin-5, putative                                      |
| PF3D7_1338100 | PVVCY_1305460 | 8.260 | 9.014 | 9.225 | 8.136 | 26S proteasome regulatory subunit RPN3, putative         |
| PF3D7_1120300 | PVVCY_0901840 | 6.438 | 6.342 | 6.083 | 6.074 | CorA-like Mg <sup>2+</sup> transporter protein, putative |
| PF3D7_0705300 | PVVCY_1000430 | 3.351 | 3.901 | 5.657 | 6.108 | origin recognition complex subunit 2, putative           |



|               |               |       |        |        |        |                                                                  |
|---------------|---------------|-------|--------|--------|--------|------------------------------------------------------------------|
| PF3D7_0322500 | PVVCY_1201680 | 5.026 | 5.002  | 4.577  | 4.885  | iron-sulfur assembly protein, putative                           |
| PF3D7_0524600 | PVVCY_1204010 | 5.118 | 6.208  | 6.705  | 6.409  | 50S ribosomal protein L12, apicoplast, putative                  |
| PF3D7_0729600 | PVVCY_0201340 | 6.814 | 7.405  | 6.986  | 6.480  | conserved Plasmodium protein, unknown function                   |
| PF3D7_1220900 | PVVCY_1403810 | 7.854 | 7.746  | 8.687  | 8.918  | heterochromatin protein 1, putative                              |
| PF3D7_1307600 | PVVCY_1400780 | 6.798 | 6.924  | 7.706  | 7.390  | DNA-directed RNA polymerase alpha chain, putative                |
| PF3D7_1123800 | PVVCY_0902180 | 4.811 | 4.994  | 6.422  | 6.539  | structural maintenance of chromosomes protein 5, putative        |
| PF3D7_1462700 | PVVCY_1302780 | 6.341 | 7.234  | 8.330  | 7.762  | cytochrome c1 precursor, putative                                |
| PF3D7_0205900 | PVVCY_0300450 | 8.282 | 8.744  | 9.209  | 8.099  | 26S proteasome regulatory subunit RPN1, putative                 |
| PF3D7_0522700 | PVVCY_1203820 | 5.114 | 6.618  | 6.722  | 5.653  | iron-sulfur assembly protein, putative                           |
| PF3D7_0904900 | PVVCY_0401760 | 6.349 | 6.829  | 6.574  | 5.414  | copper-transporting ATPase, putative                             |
| PF3D7_1134100 | PVVCY_0903280 | 6.208 | 6.940  | 7.437  | 6.885  | protein disulfide isomerase related protein, putative            |
| PF3D7_0509000 | PVVCY_1100950 | 7.458 | 7.654  | 7.575  | 6.849  | SNAP protein, putative                                           |
| PF3D7_1214900 | PVVCY_1403270 | 7.754 | 7.840  | 8.173  | 8.159  | conserved Plasmodium protein, unknown function                   |
| PF3D7_1403200 | PVVCY_1004420 | 5.159 | 4.135  | 4.352  | 5.702  | conserved Plasmodium protein, unknown function                   |
| PF3D7_1005900 | PVVCY_1200480 | 6.077 | 6.749  | 7.322  | 6.711  | conserved Plasmodium protein, unknown function                   |
| PF3D7_1210100 | PVVCY_0600880 | 6.183 | 5.969  | 5.725  | 6.400  | SNARE protein, putative                                          |
| PF3D7_0508200 | PVVCY_1100870 | 3.628 | 3.276  | 4.107  | 4.512  | longevity-assurance (LAG1) protein, putative                     |
| PF3D7_0828500 | PVVCY_0700210 | 5.344 | 5.700  | 5.731  | 4.787  | translation initiation factor eIF-2B subunit alpha, putative     |
| PF3D7_0803400 | PVVCY_1202780 | 2.768 | 3.186  | 5.726  | 5.690  | DNA repair and recombination protein RAD54, putative             |
| PF3D7_0519100 | PVVCY_1203480 | 5.820 | 6.935  | 7.105  | 5.600  | mitochondrial ribosomal protein L14 precursor, putative          |
| PF3D7_1108600 | PVVCY_0900790 | 9.114 | 10.329 | 11.276 | 10.633 | endoplasmic reticulum-resident calcium binding protein, putative |
| PF3D7_0306600 | PVVCY_0400560 | 6.599 | 7.464  | 8.504  | 7.267  | conserved Plasmodium protein, unknown function                   |
| PF3D7_0605400 | PVVCY_0100550 | 4.410 | 5.184  | 4.791  | 4.825  | calcium-binding protein, putative                                |
| PF3D7_0411900 | PVVCY_0601350 | 3.687 | 4.277  | 6.877  | 6.840  | DNA polymerase alpha catalytic subunit A, putative               |
| PF3D7_1111800 | PVVCY_0901040 | 3.166 | 4.413  | 5.793  | 6.017  | peptidyl-prolyl cis-trans isomerase, putative                    |
| PF3D7_0624700 | PVVCY_1102470 | 3.451 | 4.769  | 6.752  | 6.456  | N-acetylglucosaminylphosphatidylinositol deacetylase, putative   |
| PF3D7_1318400 | PVVCY_1401850 | 4.305 | 4.174  | 5.984  | 6.692  | structural maintenance of chromosomes protein 2, putative        |
| PF3D7_1139700 | PVVCY_0903810 | 3.680 | 4.472  | 5.272  | 4.712  | adrenodoxin reductase, putative                                  |
| PF3D7_0615500 | PVVCY_1203120 | 3.436 | 2.978  | 5.588  | 5.882  | cdc2-related protein kinase 5, putative                          |
| PF3D7_1470400 | PVVCY_1303610 | 3.952 | 4.221  | 6.344  | 6.358  | mitochondrial pyruvate carrier protein 2, putative               |
| PF3D7_1210700 | PVVCY_0600950 | 5.448 | 5.534  | 5.304  | 5.281  | conserved Plasmodium protein, unknown function                   |
| PF3D7_0316500 | PVVCY_0401540 | 3.376 | 3.338  | 5.738  | 6.333  | kinetochore protein NUF2, putative                               |
| PF3D7_1472700 | PVVCY_1303840 | 6.460 | 7.108  | 7.586  | 7.000  | DNA-directed RNA polymerase, alpha subunit, putative             |
| PF3D7_1137500 | PVVCY_0903600 | 6.241 | 7.341  | 7.930  | 7.329  | apicoplast ribosomal protein S14p/S29e precursor, putative       |

|               |               |       |        |        |        |                                                              |
|---------------|---------------|-------|--------|--------|--------|--------------------------------------------------------------|
| PF3D7_1105500 | PVVCY_0900490 | 4.548 | 4.890  | 6.318  | 6.656  | centrin-4, putative                                          |
| PF3D7_1368100 | PVVCY_1104500 | 8.104 | 8.607  | 8.857  | 7.839  | 26S proteasome regulatory subunit RPN11, putative            |
| PF3D7_1104400 | PVVCY_0900370 | 8.659 | 9.023  | 9.371  | 8.806  | thioredoxin, putative                                        |
| PF3D7_0416400 | PVVCY_0701820 | 4.220 | 5.077  | 7.019  | 6.911  | histone acetyltransferase, putative                          |
| PF3D7_0109850 | PVVCY_0200360 | 2.635 | 1.984  | 5.354  | 5.645  | phosphatidate cytidyltransferase, putative                   |
| PF3D7_1205300 | PVVCY_0600440 | 4.461 | 5.019  | 5.622  | 5.759  | conserved Plasmodium protein, unknown function               |
| PF3D7_0107000 | PVVCY_0200610 | 5.628 | 6.203  | 8.532  | 9.034  | centrin-1, putative                                          |
| PF3D7_1465000 | PVVCY_1303080 | 6.770 | 7.573  | 8.380  | 7.907  | conserved Plasmodium protein, unknown function               |
| PF3D7_1346600 | PVVCY_1306260 | 3.494 | 4.793  | 5.625  | 4.623  | conserved Plasmodium protein, unknown function               |
| PF3D7_0310900 | PVVCY_0400970 | 4.166 | 4.181  | 6.195  | 6.799  | conserved Plasmodium protein, unknown function               |
| PF3D7_1363100 | PVVCY_1104020 | 4.888 | 4.995  | 4.919  | 4.335  | conserved Plasmodium protein, unknown function               |
| PF3D7_0527000 | PVVCY_1204250 | 5.552 | 5.904  | 8.661  | 8.704  | DNA replication licensing factor MCM3, putative              |
| PF3D7_0503000 | PVVCY_1100360 | 6.902 | 7.446  | 7.851  | 7.004  | 50S ribosomal protein L28, apicoplast, putative              |
| PF3D7_0913600 | PVVCY_0801200 | 4.714 | 4.432  | 4.833  | 4.277  | conserved Plasmodium protein, unknown function               |
| PF3D7_0504800 | PVVCY_1100530 | 2.853 | 2.671  | 4.381  | 4.984  | conserved Plasmodium protein, unknown function               |
| PF3D7_1322000 | PVVCY_1303990 | 7.516 | 8.270  | 8.253  | 7.553  | adenosine-diphosphatase, putative                            |
| PF3D7_1211300 | PVVCY_0601000 | 2.053 | 2.883  | 4.305  | 4.136  | DNA helicase MCM8, putative                                  |
| PF3D7_0408500 | PVVCY_0800640 | 4.687 | 5.178  | 7.283  | 7.238  | flap endonuclease 1, putative                                |
| PF3D7_1426600 | PVVCY_1002290 | 4.787 | 4.975  | 4.578  | 3.938  | conserved Plasmodium protein, unknown function               |
| PF3D7_1467400 | PVVCY_1303320 | 5.485 | 6.349  | 6.176  | 5.628  | 50S ribosomal protein L22, apicoplast, putative              |
| PF3D7_0728600 | PVVCY_0201240 | 5.198 | 5.860  | 5.150  | 4.489  | zinc finger protein, putative                                |
| PF3D7_1011900 | PVVCY_1201110 | 6.241 | 6.955  | 7.000  | 6.988  | heme oxygenase, putative                                     |
| PF3D7_0404200 | PVVCY_0800220 | 5.625 | 6.449  | 6.697  | 5.769  | conserved Plasmodium protein, unknown function               |
| PF3D7_1228300 | PVVCY_1404510 | 4.378 | 4.628  | 7.283  | 7.204  | NIMA related kinase 1, putative                              |
| PF3D7_0705400 | PVVCY_1000440 | 5.289 | 6.761  | 8.741  | 8.377  | DNA replication licensing factor MCM7, putative              |
| PF3D7_1358300 | PVVCY_1103580 | 2.851 | 4.013  | 4.117  | 4.542  | rhomboid protease ROM7, putative                             |
| PF3D7_1105500 | PVVCY_0900490 | 4.548 | 4.890  | 6.318  | 6.656  | centrin-4, putative                                          |
| PF3D7_1401800 | PVVCY_1004550 | 7.970 | 7.555  | 7.703  | 8.457  | choline kinase, putative                                     |
| PF3D7_1437200 | PVVCY_0601170 | 7.242 | 7.414  | 9.533  | 9.535  | ribonucleoside-diphosphate reductase large subunit, putative |
| PF3D7_0603500 | PVVCY_0100370 | 3.752 | 4.555  | 6.547  | 6.607  | cation_H+ antiporter, putative                               |
| PF3D7_1214100 | PVVCY_1403190 | 5.774 | 5.718  | 5.242  | 4.644  | GPI ethanolamine phosphate transferase 3, putative           |
| PF3D7_1249600 | PVVCY_1406460 | 0.099 | 0.358  | 0.274  | 0.250  | leucine-rich repeat protein                                  |
| PF3D7_0927700 | PVVCY_0802610 | 4.586 | 5.712  | 6.101  | 5.305  | serine_threonine protein phosphatase 4, putative             |
| PF3D7_0913600 | PVVCY_0801200 | 4.714 | 4.432  | 4.833  | 4.277  | conserved Plasmodium protein, unknown function               |
| PF3D7_1352500 | PVVCY_1306820 | 9.639 | 10.149 | 11.516 | 11.162 | thioredoxin-related protein, putative                        |
| PF3D7_0504800 | PVVCY_1100530 | 2.853 | 2.671  | 4.381  | 4.984  | conserved Plasmodium protein, unknown function               |

|               |               |       |       |       |       |                                                                       |
|---------------|---------------|-------|-------|-------|-------|-----------------------------------------------------------------------|
| PF3D7_0803400 | PVVCY_1202780 | 2.768 | 3.186 | 5.726 | 5.690 | DNA repair and recombination protein RAD54, putative                  |
| PF3D7_1328200 | PVVCY_1304600 | 2.127 | 1.592 | 3.960 | 4.528 | conserved Plasmodium protein, unknown function                        |
| PF3D7_1036800 | PVVCY_0502020 | 4.501 | 5.385 | 6.953 | 6.418 | acetyl-CoA transporter, putative                                      |
| PF3D7_0811100 | PVVCY_1402830 | 5.667 | 6.067 | 6.066 | 5.679 | mitochondrial carrier protein, putative                               |
| PF3D7_1465100 | PVVCY_1303090 | 4.481 | 4.576 | 4.054 | 3.807 | conserved oligomeric Golgi complex subunit 6, putative                |
| PF3D7_0509900 | PVVCY_1101040 | 4.283 | 5.975 | 6.957 | 6.131 | conserved Plasmodium protein, unknown function                        |
| PF3D7_0504900 | PVVCY_1100540 | 4.590 | 3.937 | 6.482 | 6.976 | conserved protein, unknown function                                   |
| PF3D7_0923500 | PVVCY_0802190 | 5.984 | 5.270 | 7.481 | 8.374 | cyclin-dependent kinases regulatory subunit, putative                 |
| PF3D7_1028200 | PVVCY_0501280 | 5.557 | 5.988 | 6.389 | 6.225 | zinc finger, C3HC4 type, putative                                     |
| PF3D7_1021300 | PVVCY_0500600 | 6.220 | 5.981 | 5.830 | 6.071 | conserved Plasmodium protein, unknown function                        |
| PF3D7_0605500 | PVVCY_0100560 | 3.898 | 4.994 | 5.224 | 4.516 | cyclin dependent kinase binding protein, putative                     |
| PF3D7_1466100 | PVVCY_1303200 | 4.067 | 4.402 | 7.018 | 7.028 | protein phosphatase containing kelch-like domains, putative           |
| PF3D7_1028200 | PVVCY_0501280 | 5.557 | 5.988 | 6.389 | 6.225 | zinc finger, C3HC4 type, putative                                     |
| PF3D7_0305600 | PVVCY_0400470 | 4.377 | 4.597 | 7.218 | 7.876 | AP endonuclease (DNA-[apurinic or apyrimidinic site] lyase), putative |
| PF3D7_1224500 | PVVCY_1404150 | 6.062 | 5.961 | 8.873 | 9.237 | histone chaperone ASF1, putative                                      |
| PF3D7_0406700 | PVVCY_0800460 | 2.066 | 1.755 | 4.304 | 4.722 | conserved Plasmodium protein, unknown function                        |
| PF3D7_0415700 | PVVCY_0701750 | 5.143 | 5.466 | 6.423 | 6.031 | conserved Plasmodium protein, unknown function                        |
| PF3D7_1034600 | PVVCY_0501890 | 6.421 | 6.416 | 6.244 | 5.955 | translation initiation factor IF-3, putative                          |
| PF3D7_1036800 | PVVCY_0502020 | 4.501 | 5.385 | 6.953 | 6.418 | acetyl-CoA transporter, putative                                      |
| PF3D7_1364600 | PVVCY_1104160 | 5.115 | 5.377 | 5.973 | 5.388 | aldehyde reductase, putative                                          |
| PF3D7_0319000 | PVVCY_1000800 | 1.389 | 1.017 | 1.466 | 1.667 | P-type ATPase, putative                                               |
| PF3D7_1458500 | PVVCY_1302370 | 2.459 | 3.036 | 5.274 | 5.474 | spindle assembly abnormal protein 4, putative                         |
| PF3D7_1212800 | PVVCY_1403080 | 4.876 | 5.167 | 6.596 | 6.660 | iron-sulfur subunit of succinate dehydrogenase, putative              |
| PF3D7_1211700 | PVVCY_0601040 | 5.844 | 6.613 | 9.073 | 8.804 | DNA replication licensing factor MCM5, putative                       |
| PF3D7_0406700 | PVVCY_0800460 | 2.066 | 1.755 | 4.304 | 4.722 | conserved Plasmodium protein, unknown function                        |
| PF3D7_1410700 | PVVCY_1003720 | 8.373 | 7.730 | 7.702 | 8.275 | conserved Plasmodium protein, unknown function                        |
| PF3D7_0414700 | PVVCY_0701650 | 5.492 | 5.804 | 5.720 | 5.852 | GTP-binding protein, putative                                         |
| PF3D7_1367500 | PVVCY_1104440 | 5.097 | 4.602 | 4.269 | 5.118 | NADH-cytochrome b5 reductase, putative                                |
| PF3D7_0723800 | PVVCY_0602160 | 4.114 | 3.073 | 5.920 | 6.741 | conserved Plasmodium protein, unknown function                        |
| PF3D7_1437100 | PVVCY_0601180 | 3.942 | 4.417 | 7.150 | 7.338 | conserved Plasmodium protein, unknown function                        |
| PF3D7_1458700 | PVVCY_1302390 | 3.954 | 5.058 | 6.786 | 6.751 | exonuclease V, mitochondrial, putative                                |
| PF3D7_1221000 | PVVCY_1403820 | 4.453 | 4.590 | 6.267 | 6.681 | histone-lysine N-methyltransferase, H3 lysine-4 specific, putative    |
| PF3D7_0306000 | PVVCY_0400500 | 7.364 | 8.163 | 9.176 | 8.776 | conserved Plasmodium protein, unknown function                        |
| PF3D7_0915700 | PVVCY_0801410 | 6.789 | 7.505 | 7.910 | 7.747 | conserved Plasmodium protein, unknown function                        |
| PF3D7_0415700 | PVVCY_0701750 | 5.143 | 5.466 | 6.423 | 6.031 | conserved Plasmodium protein, unknown function                        |

|               |               |        |        |        |       |                                                            |
|---------------|---------------|--------|--------|--------|-------|------------------------------------------------------------|
| PF3D7_0306500 | PVVCY_0400550 | 6.248  | 7.329  | 7.878  | 7.316 | conserved Plasmodium protein, unknown function             |
| PF3D7_1468500 | PVVCY_1303430 | 7.585  | 7.780  | 8.004  | 7.569 | derlin-1, putative                                         |
| PF3D7_0624500 | PVVCY_1102450 | 7.376  | 8.253  | 8.977  | 8.348 | anaphase-promoting complex subunit 11, putative            |
| PF3D7_1426900 | PVVCY_1002260 | 8.099  | 9.002  | 9.686  | 9.144 | ubiquinol-cytochrome c reductase hinge protein, putative   |
| PF3D7_1221300 | PVVCY_1403850 | 4.008  | 2.588  | 5.057  | 6.245 | conserved Plasmodium protein, unknown function             |
| PF3D7_0306400 | PVVCY_0400540 | 7.273  | 7.397  | 8.661  | 8.550 | FAD-dependent glycerol-3-phosphate dehydrogenase, putative |
| PF3D7_1304100 | PVVCY_1400430 | 5.552  | 6.299  | 7.912  | 7.516 | DNA ligase I, putative                                     |
| PF3D7_1116500 | PVVCY_0901470 | 6.193  | 6.010  | 7.220  | 7.240 | folate transporter 2, putative                             |
| PF3D7_1201600 | PVVCY_0600080 | 4.868  | 4.933  | 4.179  | 4.583 | NIMA related kinase 3, putative                            |
| PF3D7_1328200 | PVVCY_1304600 | 2.127  | 1.592  | 3.960  | 4.528 | conserved Plasmodium protein, unknown function             |
| PF3D7_0914800 | PVVCY_0801320 | 2.540  | 3.828  | 4.404  | 4.927 | GINS complex subunit Psf3, putative                        |
| PF3D7_0904700 | PVVCY_0401780 | 6.638  | 7.463  | 8.670  | 8.779 | bacterial histone-like protein, putative                   |
| PF3D7_1032500 | PVVCY_0501680 | 9.597  | 9.281  | 9.004  | 8.746 | DER1-like protein, putative                                |
| PF3D7_1361700 | PVVCY_1103880 | 6.328  | 7.706  | 8.390  | 8.228 | cytochrome c oxidase subunit 2, putative                   |
| PF3D7_0723800 | PVVCY_0602160 | 4.114  | 3.073  | 5.920  | 6.741 | conserved Plasmodium protein, unknown function             |
| PF3D7_1124600 | PVVCY_0902260 | 7.354  | 7.333  | 7.353  | 7.618 | ethanolamine kinase, putative                              |
| PF3D7_0708700 | PVVCY_1202010 | 7.310  | 7.929  | 8.640  | 7.960 | Cg8 protein, putative                                      |
| PF3D7_1230400 | PVVCY_1404720 | 7.565  | 7.845  | 7.914  | 6.830 | ATP-dependent protease subunit ClpQ, putative              |
| PF3D7_1113300 | PVVCY_0901190 | 5.177  | 6.280  | 8.339  | 8.476 | UDP-galactose transporter, putative                        |
| PF3D7_1121900 | PVVCY_0901990 | 3.038  | 4.302  | 6.141  | 5.879 | serine threonine protein kinase, putative                  |
| PF3D7_1115600 | PVVCY_0901400 | 10.732 | 11.261 | 11.000 | 9.979 | peptidyl-prolyl cis-trans isomerase, putative              |
| PF3D7_1234900 | PVVCY_1405160 | 7.583  | 8.137  | 8.852  | 7.937 | conserved Plasmodium protein, unknown function             |
| PF3D7_0105800 | PVVCY_0200730 | 4.557  | 3.947  | 6.912  | 7.439 | conserved Plasmodium protein, unknown function             |
| PF3D7_1325600 | PVVCY_1304330 | 4.595  | 4.469  | 6.942  | 7.021 | mitochondrial fission 1 protein, putative                  |
| PF3D7_0105800 | PVVCY_0200730 | 4.557  | 3.947  | 6.912  | 7.439 | conserved Plasmodium protein, unknown function             |
| PF3D7_1414400 | PVVCY_1003370 | 8.670  | 8.566  | 8.861  | 8.270 | serine threonine protein phosphatase PP1, putative         |
| PF3D7_0811000 | PVVCY_1402840 | 3.070  | 3.084  | 5.381  | 5.753 | cullin-1, putative                                         |
| PF3D7_1012000 | PVVCY_1201120 | 5.668  | 5.386  | 6.394  | 6.848 | E3 ubiquitin-protein ligase, putative                      |
| PF3D7_1202200 | PVVCY_0600130 | 6.212  | 6.966  | 8.244  | 7.906 | mitochondrial phosphate carrier protein, putative          |
| PF3D7_1304000 | PVVCY_1400420 | 4.075  | 3.969  | 6.504  | 6.849 | condensin complex subunit 2, putative                      |
| PF3D7_1012300 | PVVCY_1201150 | 7.581  | 8.413  | 8.966  | 8.511 | cytochrome b-c1 complex subunit 7, putative                |
| PF3D7_0526400 | PVVCY_1204190 | 3.203  | 4.463  | 5.456  | 5.261 | conserved Plasmodium protein, unknown function             |
| PF3D7_0525200 | PVVCY_1204070 | 4.491  | 4.793  | 5.936  | 6.151 | structural maintenance of chromosomes protein 6, putative  |
| PF3D7_1141300 | PVVCY_0903970 | 4.216  | 3.932  | 5.939  | 6.729 | conserved Plasmodium protein, unknown function             |
| PF3D7_1220300 | PVVCY_1403760 | 2.203  | 1.999  | 4.413  | 4.929 | conserved Plasmodium protein, unknown function             |
| PF3D7_1004500 | PVVCY_1200340 | 2.504  | 3.508  | 3.145  | 4.867 | conserved Plasmodium protein, unknown function             |

|               |               |       |       |       |       |                                                                                       |
|---------------|---------------|-------|-------|-------|-------|---------------------------------------------------------------------------------------|
| PF3D7_1215000 | PVVCY_1403280 | 4.231 | 5.884 | 6.253 | 5.244 | thioredoxin peroxidase 2, putative                                                    |
| PF3D7_0723800 | PVVCY_0602160 | 4.114 | 3.073 | 5.920 | 6.741 | conserved Plasmodium protein, unknown function                                        |
| PF3D7_1116600 | PVVCY_0901480 | 4.716 | 5.570 | 5.004 | 3.316 | dolichyl-diphosphooligosaccharide--protein glycosyltransferase subunit STT3, putative |
| PF3D7_0314000 | PVVCY_0401280 | 7.099 | 7.725 | 8.002 | 7.171 | co-chaperone p23, putative                                                            |
| PF3D7_0919400 | PVVCY_0801770 | 5.203 | 6.802 | 7.892 | 6.986 | protein disulfide isomerase, putative                                                 |
| PF3D7_1430900 | PVVCY_1001860 | 8.018 | 8.877 | 9.049 | 8.808 | cytochrome c oxidase subunit 2, putative                                              |
| PF3D7_0815500 | PVVCY_0701510 | 3.377 | 3.165 | 6.474 | 6.757 | conserved Plasmodium protein, unknown function                                        |
| PF3D7_1367500 | PVVCY_1104440 | 5.097 | 4.602 | 4.269 | 5.118 | NADH-cytochrome b5 reductase, putative                                                |
| PF3D7_1312600 | PVVCY_1401330 | 4.290 | 6.188 | 7.639 | 6.936 | 2-oxoisovalerate dehydrogenase subunit alpha, mitochondrial, putative                 |
| PF3D7_1248000 | PVVCY_1406300 | 3.216 | 3.824 | 4.275 | 4.083 | conserved Plasmodium protein, unknown function                                        |
| PF3D7_0406700 | PVVCY_0800460 | 2.066 | 1.755 | 4.304 | 4.722 | conserved Plasmodium protein, unknown function                                        |
| PF3D7_0508400 | PVVCY_1100890 | 3.507 | 2.265 | 3.212 | 4.192 | transcription factor IIb, putative                                                    |
| PF3D7_1121000 | PVVCY_0901900 | 6.270 | 5.179 | 6.761 | 7.808 | palmitoyltransferase DHHC3, putative                                                  |
| PF3D7_0805000 | PVVCY_1202650 | 8.312 | 8.157 | 7.155 | 7.430 | alpha_beta hydrolase, putative                                                        |
| PF3D7_1145600 | PVVCY_0904390 | 1.919 | 1.907 | 2.454 | 2.713 | conserved protein, unknown function                                                   |
| PF3D7_1121900 | PVVCY_0901990 | 3.038 | 4.302 | 6.141 | 5.879 | serine threonine protein kinase, putative                                             |
| PF3D7_1215400 | PVVCY_1403320 | 7.378 | 7.205 | 7.273 | 7.204 | conserved Plasmodium protein, unknown function                                        |
| PF3D7_0618500 | PVVCY_1101850 | 4.521 | 5.771 | 7.227 | 6.826 | malate dehydrogenase, putative                                                        |
| PF3D7_1116500 | PVVCY_0901470 | 6.193 | 6.010 | 7.220 | 7.240 | folate transporter 2, putative                                                        |
| PF3D7_0715300 | PVVCY_1402340 | 1.834 | 1.416 | 1.142 | 2.098 | calcium_calmodulin-dependent protein kinase, putative                                 |
| PF3D7_1422100 | PVVCY_1002630 | 5.220 | 5.821 | 5.461 | 4.696 | mitochondrial ribosomal protein L21 precursor, putative                               |
| PF3D7_1356100 | PVVCY_1103360 | 5.144 | 5.589 | 6.763 | 6.444 | conserved Plasmodium protein, unknown function                                        |
| PF3D7_0909600 | PVVCY_1001260 | 3.966 | 3.767 | 6.190 | 6.825 | conserved Plasmodium protein, unknown function                                        |
| PF3D7_1028800 | PVVCY_0501340 | 7.523 | 8.693 | 9.115 | 8.572 | conserved Plasmodium protein, unknown function                                        |
| PF3D7_0414700 | PVVCY_0701650 | 5.492 | 5.804 | 5.720 | 5.852 | GTP-binding protein, putative                                                         |
| PF3D7_0317200 | PVVCY_1000970 | 4.630 | 3.846 | 7.363 | 7.900 | cdc2-related protein kinase 4, putative                                               |
| PF3D7_1440100 | PVVCY_1300580 | 4.139 | 3.202 | 6.338 | 7.091 | conserved Plasmodium protein, unknown function                                        |
| PF3D7_0819700 | PVVCY_0701090 | 3.811 | 4.338 | 4.681 | 4.889 | conserved Plasmodium protein, unknown function                                        |
| PF3D7_1445000 | PVVCY_1301050 | 3.426 | 4.639 | 5.515 | 5.562 | conserved Plasmodium protein, unknown function                                        |
| PF3D7_1461100 | PVVCY_1302630 | 2.810 | 2.313 | 3.520 | 4.125 | conserved Plasmodium protein, unknown function                                        |
| PF3D7_0816200 | PVVCY_0701440 | 5.247 | 4.603 | 5.946 | 6.726 | vacuolar protein sorting-associated protein 2, putative                               |
| PF3D7_0310400 | PVVCY_0400930 | 3.586 | 3.733 | 6.228 | 6.743 | parasite-infected erythrocyte surface protein                                         |
| PF3D7_0717600 | PVVCY_0601560 | 4.511 | 3.555 | 5.191 | 6.093 | conserved Plasmodium protein, unknown function                                        |
| PF3D7_0413500 | PVVCY_0701530 | 7.920 | 8.299 | 8.371 | 8.247 | phosphoglucomutase-2, putative                                                        |
| PF3D7_1457400 | PVVCY_1302260 | 4.798 | 4.828 | 4.850 | 3.866 | conserved Plasmodium protein, unknown function                                        |
| PF3D7_0815500 | PVVCY_0701510 | 3.377 | 3.165 | 6.474 | 6.757 | conserved Plasmodium protein, unknown function                                        |

|               |               |       |       |       |       |                                                                |
|---------------|---------------|-------|-------|-------|-------|----------------------------------------------------------------|
| PF3D7_0724000 | PVVCY_0602180 | 3.046 | 4.119 | 4.603 | 3.836 | Rab GTPase activator and protein kinase, putative              |
| PF3D7_1326000 | PVVCY_1304370 | 7.381 | 7.867 | 8.674 | 8.679 | conserved Plasmodium protein, unknown function                 |
| PF3D7_1330500 | PVVCY_1304820 | 5.313 | 6.110 | 5.841 | 5.135 | conserved Plasmodium protein, unknown function                 |
| PF3D7_1421900 | PVVCY_1002650 | 5.589 | 6.292 | 5.519 | 5.116 | copper transporter, putative                                   |
| PF3D7_0816400 | PVVCY_0701420 | 4.504 | 5.543 | 6.299 | 6.893 | EF-hand calcium-binding domain-containing protein              |
| PF3D7_0302700 | PVVCY_0400190 | 6.618 | 7.298 | 7.021 | 6.277 | CDGSH iron-sulfur domain-containing protein, putative          |
| PF3D7_0311300 | PVVCY_0401010 | 7.442 | 7.428 | 6.978 | 6.335 | phosphatidylinositol 3- and 4-kinase, putative                 |
| PF3D7_1201600 | PVVCY_0600080 | 4.868 | 4.933 | 4.179 | 4.583 | NIMA related kinase 3, putative                                |
| PF3D7_1408700 | PVVCY_1003920 | 5.584 | 5.636 | 5.763 | 5.173 | conserved Plasmodium protein, unknown function                 |
| PF3D7_1121300 | PVVCY_0901930 | 3.247 | 3.882 | 6.859 | 7.018 | tyrosine kinase-like protein, putative                         |
| PF3D7_0717600 | PVVCY_0601560 | 4.511 | 3.555 | 5.191 | 6.093 | conserved Plasmodium protein, unknown function                 |
| PF3D7_1339400 | PVVCY_1305580 | 7.470 | 8.309 | 8.798 | 8.455 | conserved Plasmodium protein, unknown function                 |
| PF3D7_1142300 | PVVCY_0904060 | 3.422 | 2.852 | 4.694 | 5.466 | conserved Plasmodium protein, unknown function                 |
| PF3D7_1121300 | PVVCY_0901930 | 3.247 | 3.882 | 6.859 | 7.018 | tyrosine kinase-like protein, putative                         |
| PF3D7_1457900 | PVVCY_1302310 | 4.506 | 4.642 | 4.859 | 4.800 | conserved Plasmodium protein, unknown function                 |
| PF3D7_1439400 | PVVCY_1300510 | 6.621 | 7.421 | 8.479 | 7.978 | ubiquinol-cytochrome c reductase iron-sulfur subunit, putative |
| PF3D7_1011900 | PVVCY_1201110 | 6.241 | 6.955 | 7.000 | 6.988 | heme oxygenase, putative                                       |
| PF3D7_1107100 | PVVCY_0900650 | 0.849 | 0.934 | 1.810 | 1.716 | nucleic acid binding protein, putative                         |
| PF3D7_0717600 | PVVCY_0601560 | 4.511 | 3.555 | 5.191 | 6.093 | conserved Plasmodium protein, unknown function                 |
| PF3D7_0416500 | PVVCY_0701830 | 4.118 | 4.591 | 4.621 | 4.669 | repressor of RNA polymerase III transcription MAF1, putative   |
| PF3D7_0927300 | PVVCY_0802570 | 5.454 | 5.545 | 5.976 | 6.025 | fumarate hydratase, putative                                   |
| PF3D7_1212500 | PVVCY_1403050 | 7.080 | 6.725 | 7.039 | 7.336 | glycerol-3-phosphate 1-O-acyltransferase, putative             |
| PF3D7_1437700 | PVVCY_0601120 | 3.776 | 5.545 | 6.888 | 6.080 | succinyl-CoA ligase, putative                                  |
| PF3D7_0314000 | PVVCY_0401280 | 7.099 | 7.725 | 8.002 | 7.171 | co-chaperone p23, putative                                     |
| PF3D7_0927000 | PVVCY_0802540 | 7.259 | 7.629 | 7.500 | 7.317 | CS domain protein, putative                                    |
| PF3D7_0619700 | PVVCY_1101970 | 4.293 | 3.989 | 5.659 | 6.392 | conserved Plasmodium protein, unknown function                 |
| PF3D7_0409000 | PVVCY_0800690 | 4.371 | 5.080 | 5.191 | 4.360 | conserved Plasmodium protein, unknown function                 |
| PF3D7_1439600 | PVVCY_1300530 | 6.976 | 7.903 | 8.438 | 7.954 | conserved Plasmodium protein, unknown function                 |
| PF3D7_1107100 | PVVCY_0900650 | 0.849 | 0.934 | 1.810 | 1.716 | nucleic acid binding protein, putative                         |
| PF3D7_0511200 | PVVCY_1101160 | 2.305 | 1.784 | 2.002 | 2.262 | stearoyl-CoA desaturase, putative                              |
| PF3D7_0212900 | PVVCY_0301070 | 7.566 | 7.519 | 7.215 | 6.905 | leucyl-phenylalanyl-tRNA--protein transferase, putative        |
| PF3D7_0626400 | PVVCY_1102640 | 3.282 | 2.477 | 5.073 | 5.707 | Sec14 protein, putative                                        |
| PF3D7_1453200 | PVVCY_1301850 | 2.889 | 2.587 | 4.938 | 5.564 | conserved Plasmodium protein, unknown function                 |
| PF3D7_1008200 | PVVCY_1200720 | 4.227 | 5.868 | 7.505 | 7.386 | endonuclease, putative                                         |
| PF3D7_1439000 | PVVCY_1300470 | 6.114 | 7.215 | 7.389 | 5.964 | copper transporter, putative                                   |
| PF3D7_1457500 | PVVCY_1302270 | 3.528 | 4.707 | 5.612 | 5.022 | vacuolar protein sorting-associated protein 4, putative        |

|               |               |       |       |       |       |                                                         |
|---------------|---------------|-------|-------|-------|-------|---------------------------------------------------------|
| PF3D7_0614900 | PVVCY_1203060 | 6.300 | 5.592 | 6.005 | 6.932 | conserved Plasmodium protein, unknown function          |
| PF3D7_1362000 | PVVCY_1103910 | 6.783 | 7.771 | 8.528 | 8.134 | conserved Plasmodium protein, unknown function          |
| PF3D7_0927300 | PVVCY_0802570 | 5.454 | 5.545 | 5.976 | 6.025 | fumarate hydratase, putative                            |
| PF3D7_1420900 | PVVCY_1002720 | 3.849 | 3.362 | 5.988 | 6.402 | mannose-1-phosphate guanyltransferase, putative         |
| PF3D7_1124200 | PVVCY_0902220 | 4.492 | 4.582 | 6.386 | 6.713 | conserved Plasmodium protein, unknown function          |
| PF3D7_1461100 | PVVCY_1302630 | 2.810 | 2.313 | 3.520 | 4.125 | conserved Plasmodium protein, unknown function          |
| PF3D7_0218100 | PVVCY_0301570 | 3.434 | 2.870 | 2.875 | 2.772 | conserved Plasmodium membrane protein, unknown function |
| PF3D7_0815300 | PVVCY_1402410 | 4.173 | 4.409 | 4.065 | 3.019 | FAD-dependent monooxygenase, putative                   |
| PF3D7_0106000 | PVVCY_0200710 | 2.820 | 2.883 | 5.096 | 5.499 | conserved Plasmodium protein, unknown function          |
| PF3D7_1031700 | PVVCY_0501600 | 7.504 | 7.375 | 7.733 | 7.775 | protein phosphatase inhibitor 3, putative               |
| PF3D7_1143200 | PVVCY_0904150 | 5.768 | 6.437 | 6.681 | 6.836 | DnaJ protein, putative                                  |
| PF3D7_1247500 | PVVCY_1406260 | 3.736 | 2.298 | 4.836 | 5.937 | serine threonine protein kinase, putative               |
| PF3D7_1343100 | PVVCY_1305920 | 6.489 | 5.781 | 7.952 | 8.744 | conserved Plasmodium protein, unknown function          |
| PF3D7_1131100 | PVVCY_0902990 | 4.010 | 4.470 | 5.934 | 6.119 | conserved Plasmodium protein, unknown function          |
| PF3D7_1112100 | PVVCY_0901070 | 3.604 | 2.924 | 5.732 | 6.331 | conserved Plasmodium protein, unknown function          |
| PF3D7_1403600 | PVVCY_1004380 | 6.994 | 7.750 | 7.900 | 7.375 | selenoprotein, putative                                 |
| PF3D7_0417900 | PVVCY_0701970 | 2.464 | 1.980 | 1.989 | 2.409 | conserved Plasmodium protein, unknown function          |
| PF3D7_0715300 | PVVCY_1402340 | 1.834 | 1.416 | 1.142 | 2.098 | calcium-calmodulin-dependent protein kinase, putative   |
| PF3D7_1243500 | PVVCY_1405890 | 5.258 | 5.438 | 7.813 | 8.207 | vacuolar-sorting protein SNF7, putative                 |
| PF3D7_1451700 | PVVCY_1301700 | 7.866 | 8.031 | 8.090 | 7.638 | calcineurin subunit B, putative                         |
| PF3D7_1122700 | PVVCY_0902070 | 4.423 | 4.252 | 7.375 | 7.625 | conserved Plasmodium protein, unknown function          |
| PF3D7_1409300 | PVVCY_1003860 | 5.457 | 6.144 | 7.165 | 6.827 | DNA damage-inducible protein 1, putative                |
| PF3D7_1028600 | PVVCY_0501320 | 8.140 | 8.897 | 9.294 | 8.687 | conserved Plasmodium protein, unknown function          |
| PF3D7_1451700 | PVVCY_1301700 | 7.866 | 8.031 | 8.090 | 7.638 | calcineurin subunit B, putative                         |
| PF3D7_1116000 | PVVCY_0901420 | 6.313 | 4.497 | 8.329 | 9.175 | rhoptry neck protein 4, putative                        |
| PF3D7_0530300 | PVVCY_1204570 | 3.012 | 2.379 | 4.419 | 5.434 | conserved Plasmodium protein, unknown function          |
| PF3D7_0106200 | PVVCY_0200690 | 3.865 | 3.490 | 5.598 | 6.514 | conserved Plasmodium protein, unknown function          |
| PF3D7_1446600 | PVVCY_1301200 | 7.550 | 8.235 | 9.025 | 9.574 | centrin-2, putative                                     |
| PF3D7_1471400 | PVVCY_1303710 | 6.849 | 5.634 | 7.063 | 8.068 | diacylglycerol kinase, putative                         |
| PF3D7_1135900 | PVVCY_0903440 | 9.372 | 9.383 | 9.617 | 9.431 | 3-oxo-5-alpha-steroid 4-dehydrogenase, putative         |
| PF3D7_0918000 | PVVCY_0801640 | 7.799 | 6.819 | 9.013 | 9.640 | glideosome-associated protein 50, putative              |
| PF3D7_0820900 | PVVCY_0700970 | 5.793 | 6.274 | 5.535 | 5.104 | conserved Plasmodium protein, unknown function          |
| PF3D7_1322500 | PVVCY_1304040 | 2.857 | 2.844 | 4.354 | 4.780 | palmitoyltransferase DHHC5, putative                    |
| PF3D7_1224100 | PVVCY_1404110 | 4.523 | 3.766 | 6.928 | 7.719 | conserved Plasmodium protein, unknown function          |
| PF3D7_1459300 | PVVCY_1302440 | 4.465 | 5.161 | 6.010 | 6.629 | OPA3-like protein, putative                             |
| PF3D7_1034700 | PVVCY_0501900 | 5.030 | 4.524 | 6.719 | 7.421 | ADP-ribosylation factor, putative                       |

|               |               |       |       |       |       |                                                                      |
|---------------|---------------|-------|-------|-------|-------|----------------------------------------------------------------------|
| PF3D7_1322500 | PVVCY_1304040 | 2.857 | 2.844 | 4.354 | 4.780 | palmitoyltransferase DHHC5, putative                                 |
| PF3D7_1333700 | PVVCY_1305110 | 6.305 | 5.952 | 7.805 | 8.176 | histone H3-like centromeric protein CSE4, putative                   |
| PF3D7_1449100 | PVVCY_1301440 | 4.409 | 3.078 | 5.513 | 6.814 | conserved Plasmodium protein, unknown function                       |
| PF3D7_0918000 | PVVCY_0801640 | 7.799 | 6.819 | 9.013 | 9.640 | glideosome-associated protein 50, putative                           |
| PF3D7_0614100 | PVVCY_0101360 | 3.407 | 2.086 | 4.815 | 5.801 | conserved Plasmodium protein, unknown function                       |
| PF3D7_1458300 | PVVCY_1302350 | 3.099 | 2.633 | 4.227 | 5.348 | conserved Plasmodium protein, unknown function                       |
| PF3D7_0723800 | PVVCY_0602160 | 4.114 | 3.073 | 5.920 | 6.741 | conserved Plasmodium protein, unknown function                       |
| PF3D7_0303200 | PVVCY_0400240 | 7.269 | 7.266 | 7.850 | 7.622 | HAD superfamily protein, putative                                    |
| PF3D7_1362800 | PVVCY_1103990 | 2.866 | 1.835 | 4.574 | 5.519 | conserved Plasmodium protein, unknown function                       |
| PF3D7_0303400 | PVVCY_0400260 | 2.242 | 1.734 | 4.207 | 4.914 | palmitoyltransferase DHHC1, putative                                 |
| PF3D7_1348100 | PVVCY_1306400 | 3.162 | 2.968 | 5.790 | 6.386 | GTPase, putative                                                     |
| PF3D7_1033900 | PVVCY_0501820 | 6.946 | 7.783 | 8.234 | 7.013 | ubiquitin-conjugating enzyme, putative                               |
| PF3D7_1419500 | PVVCY_1002860 | 1.220 | 1.445 | 3.554 | 3.993 | conserved Plasmodium protein, unknown function                       |
| PF3D7_1029900 | PVVCY_0501440 | 4.539 | 4.671 | 7.045 | 7.465 | conserved Plasmodium protein, unknown function                       |
| PF3D7_0705100 | PVVCY_1000410 | 3.733 | 2.737 | 5.058 | 5.984 | conserved Plasmodium protein, unknown function                       |
| PF3D7_0207000 | PVVCY_0300540 | 7.557 | 7.564 | 8.869 | 9.069 | merozoite surface protein 4/5, putative                              |
| PF3D7_1105300 | PVVCY_0900470 | 7.418 | 7.481 | 8.400 | 8.364 | conserved Plasmodium protein, unknown function                       |
| PF3D7_1110700 | PVVCY_0900940 | 4.810 | 5.365 | 7.348 | 7.324 | actin-like protein, putative                                         |
| PF3D7_0504600 | PVVCY_1100510 | 4.570 | 6.358 | 7.932 | 7.307 | 2-oxoisovalerate dehydrogenase subunit beta, mitochondrial, putative |
| PF3D7_1138400 | PVVCY_0903710 | 2.452 | 1.609 | 4.270 | 4.979 | guanylyl cyclase, putative                                           |
| PF3D7_1031800 | PVVCY_0501610 | 2.609 | 3.617 | 5.233 | 5.296 | conserved Plasmodium protein, unknown function                       |
| PF3D7_0414600 | PVVCY_0701640 | 5.005 | 4.732 | 6.622 | 7.158 | conserved Plasmodium protein, unknown function                       |
| PF3D7_0603800 | PVVCY_0100400 | 2.773 | 2.429 | 5.112 | 5.659 | centrosomal protein CEP76, putative                                  |
| PF3D7_0803200 | PVVCY_1202800 | 4.411 | 3.267 | 5.837 | 7.198 | SF-assemblin, putative                                               |
| PF3D7_0204100 | PVVCY_0300280 | 5.475 | 5.706 | 6.197 | 5.821 | conserved Plasmodium protein, unknown function                       |
| PF3D7_1453200 | PVVCY_1301850 | 2.889 | 2.587 | 4.938 | 5.564 | conserved Plasmodium protein, unknown function                       |
| PF3D7_1238600 | PVVCY_1405530 | 5.731 | 5.363 | 5.485 | 6.519 | sphingomyelin phosphodiesterase, putative                            |
| PF3D7_0211600 | PVVCY_0300940 | 2.964 | 4.751 | 5.715 | 5.218 | UDP-N-acetylglucosamine transferase subunit ALG14, putative          |
| PF3D7_1342100 | PVVCY_1305830 | 4.905 | 6.015 | 6.777 | 6.308 | aconitate hydratase, putative                                        |
| PF3D7_1315300 | PVVCY_1401540 | 5.077 | 3.715 | 7.049 | 7.903 | conserved Plasmodium protein, unknown function                       |
| PF3D7_0405200 | PVVCY_0800320 | 3.986 | 2.318 | 4.981 | 6.424 | ag-1 blood stage membrane protein homologue                          |
| PF3D7_1132800 | PVVCY_0903150 | 6.524 | 6.068 | 8.211 | 9.020 | aquaglyceroporin, putative                                           |
| PF3D7_1362800 | PVVCY_1103990 | 2.866 | 1.835 | 4.574 | 5.519 | conserved Plasmodium protein, unknown function                       |
| PF3D7_1033900 | PVVCY_0501820 | 6.946 | 7.783 | 8.234 | 7.013 | ubiquitin-conjugating enzyme, putative                               |
| PF3D7_0829400 | PVVCY_0700120 | 2.983 | 2.348 | 3.942 | 5.014 | prolyl 4-hydroxylase subunit alpha, putative                         |
| PF3D7_1123200 | PVVCY_0902120 | 3.091 | 3.160 | 5.121 | 5.264 | leucine-rich repeat protein                                          |



|               |               |        |        |        |        |                                                |
|---------------|---------------|--------|--------|--------|--------|------------------------------------------------|
| PF3D7_0820900 | PVVCY_0700970 | 5.793  | 6.274  | 5.535  | 5.104  | conserved Plasmodium protein, unknown function |
| PF3D7_0703600 | PVVCY_1000260 | 4.011  | 3.132  | 5.850  | 7.167  | conserved Plasmodium protein, unknown function |
| PF3D7_1141800 | PVVCY_0904020 | 4.786  | 3.761  | 7.088  | 7.693  | phd finger protein, putative                   |
| PF3D7_0820900 | PVVCY_0700970 | 5.793  | 6.274  | 5.535  | 5.104  | conserved Plasmodium protein, unknown function |
| PF3D7_0508100 | PVVCY_1100860 | 3.179  | 1.954  | 5.230  | 6.013  | SET domain protein, putative                   |
| PF3D7_1443000 | PVVCY_1300860 | 3.269  | 3.850  | 5.384  | 5.274  | serine threonine protein kinase, putative      |
| PF3D7_0508100 | PVVCY_1100860 | 3.179  | 1.954  | 5.230  | 6.013  | SET domain protein, putative                   |
| PF3D7_0508000 | PVVCY_1100850 | 6.039  | 4.744  | 7.799  | 8.829  | 6-cysteine protein                             |
| PF3D7_1356300 | PVVCY_1103380 | 8.455  | 8.591  | 8.861  | 7.999  | ubiquitin-conjugating enzyme, putative         |
| PF3D7_1328300 | PVVCY_1304610 | 5.918  | 3.879  | 7.280  | 8.670  | conserved Plasmodium protein, unknown function |
| PF3D7_0806300 | PVVCY_1202530 | 2.637  | 3.647  | 5.517  | 5.442  | ferlin, putative                               |
| PF3D7_1432300 | PVVCY_1001740 | 3.307  | 3.447  | 3.375  | 2.648  | conserved Plasmodium protein, unknown function |
| PF3D7_1141800 | PVVCY_0904020 | 4.786  | 3.761  | 7.088  | 7.693  | phd finger protein, putative                   |
| PF3D7_1432900 | PVVCY_1001680 | 2.846  | 1.385  | 4.229  | 5.458  | SF-assemblin, putative                         |
| PF3D7_1349100 | PVVCY_1306500 | 6.380  | 6.892  | 6.678  | 5.651  | nucleoside diphosphate hydrolase, putative     |
| PF3D7_1438100 | PVVCY_1300380 | 8.271  | 8.574  | 9.069  | 8.511  | translocation protein sec62, putative          |
| PF3D7_1133300 | PVVCY_0903200 | 2.975  | 1.954  | 4.770  | 5.583  | LEM3_CDC50 family protein, putative            |
| PF3D7_1402200 | PVVCY_1004510 | 6.423  | 7.392  | 7.952  | 7.835  | conserved Plasmodium protein, unknown function |
| PF3D7_0919800 | PVVCY_0801810 | 4.759  | 5.473  | 6.890  | 6.764  | TLD domain-containing protein                  |
| PF3D7_0503400 | PVVCY_1100400 | 9.067  | 11.288 | 12.790 | 11.908 | actin-depolymerizing factor 1, putative        |
| PF3D7_1019600 | PVVCY_0500430 | 3.561  | 3.692  | 4.277  | 3.842  | conserved Plasmodium protein, unknown function |
| PF3D7_0908000 | PVVCY_1001120 | 5.620  | 5.275  | 6.670  | 7.370  | P1 nuclease, putative                          |
| PF3D7_0209600 | PVVCY_0300770 | 3.000  | 2.297  | 5.361  | 6.105  | transporter, putative                          |
| PF3D7_0819600 | PVVCY_0701100 | 10.177 | 9.462  | 9.425  | 10.135 | conserved Plasmodium protein, unknown function |
| PF3D7_1019600 | PVVCY_0500430 | 3.561  | 3.692  | 4.277  | 3.842  | conserved Plasmodium protein, unknown function |
| PF3D7_1328100 | PVVCY_1304590 | 9.363  | 10.187 | 10.349 | 9.107  | proteasome subunit beta type-7, putative       |
| PF3D7_1140900 | PVVCY_0903930 | 4.020  | 4.632  | 4.787  | 3.857  | conserved Plasmodium protein, unknown function |
| PF3D7_0308100 | PVVCY_0400710 | 4.096  | 3.320  | 5.970  | 6.852  | conserved Plasmodium protein, unknown function |
| PF3D7_0403900 | PVVCY_0800190 | 3.819  | 4.484  | 6.248  | 6.105  | SET domain protein, putative                   |
| PF3D7_0410700 | PVVCY_0800860 | 5.622  | 5.949  | 5.805  | 5.202  | ribosome biogenesis GTPase A, putative         |
| PF3D7_1349300 | PVVCY_1306520 | 2.344  | 2.715  | 4.870  | 4.720  | tyrosine kinase-like protein, putative         |
| PF3D7_1144900 | PVVCY_0904320 | 7.367  | 7.339  | 8.255  | 8.794  | ras-related protein Rab-6, putative            |
| PF3D7_0405200 | PVVCY_0800320 | 3.986  | 2.318  | 4.981  | 6.424  | ag-1 blood stage membrane protein homologue    |
| PF3D7_0927900 | PVVCY_0802630 | 6.384  | 5.629  | 5.476  | 6.708  | phosphatidylserine decarboxylase, putative     |
| PF3D7_1114900 | PVVCY_0901340 | 2.919  | 2.604  | 4.754  | 5.312  | conserved Plasmodium protein, unknown function |
| PF3D7_1021400 | PVVCY_0500610 | 6.770  | 6.636  | 7.050  | 6.593  | endomembrane protein 70, putative              |
| PF3D7_0932200 | PVVCY_0803060 | 7.294  | 9.359  | 11.204 | 10.418 | profilin, putative                             |
| PF3D7_1124000 | PVVCY_0902200 | 8.128  | 6.796  | 6.661  | 8.236  | endoplasmic reticulum oxidoreductin, putative  |

|               |               |        |        |        |        |                                                                                      |
|---------------|---------------|--------|--------|--------|--------|--------------------------------------------------------------------------------------|
| PF3D7_0207100 | PVVCY_0300550 | 5.476  | 5.416  | 5.503  | 6.257  | conserved Plasmodium protein, unknown function                                       |
| PF3D7_1114800 | PVVCY_0901330 | 1.451  | 1.037  | 2.882  | 3.465  | glycerol-3-phosphate dehydrogenase, putative                                         |
| PF3D7_0405200 | PVVCY_0800320 | 3.986  | 2.318  | 4.981  | 6.424  | ag-1 blood stage membrane protein homologue                                          |
| PF3D7_1206300 | PVVCY_0600530 | 4.165  | 3.003  | 5.158  | 6.875  | conserved Plasmodium protein, unknown function                                       |
| PF3D7_0915000 | PVVCY_0801340 | 4.529  | 5.359  | 6.627  | 6.613  | type II NADH:ubiquinone oxidoreductase, putative                                     |
| PF3D7_1228600 | PVVCY_1404540 | 9.116  | 8.960  | 12.190 | 12.490 | merozoite surface protein 9, putative                                                |
| PF3D7_1002900 | PVVCY_1200190 | 8.866  | 8.762  | 8.328  | 8.840  | conserved Plasmodium protein, unknown function                                       |
| PF3D7_0506900 | PVVCY_1100740 | 6.150  | 5.528  | 7.333  | 7.576  | rhomboid protease ROM4, putative                                                     |
| PF3D7_1216500 | PVVCY_1403420 | 7.469  | 6.149  | 6.917  | 8.131  | male development gene 1, putative                                                    |
| PF3D7_0724800 | PVVCY_0602270 | 3.702  | 5.047  | 5.228  | 4.093  | kelch domain-containing protein, putative                                            |
| PF3D7_0704800 | PVVCY_1000380 | 3.805  | 2.101  | 4.992  | 6.372  | conserved Plasmodium protein, unknown function                                       |
| PF3D7_0523000 | PVVCY_1203850 | 10.479 | 10.101 | 9.886  | 9.696  | ABC transporter B family member 1, putative multidrug resistance protein 1, putative |
| PF3D7_1328300 | PVVCY_1304610 | 5.918  | 3.879  | 7.280  | 8.670  | conserved Plasmodium protein, unknown function                                       |
| PF3D7_1246000 | PVVCY_1406120 | 2.064  | 1.332  | 1.576  | 1.917  | conserved Plasmodium protein, unknown function                                       |
| PF3D7_1406800 | PVVCY_1004080 | 8.384  | 7.361  | 9.312  | 10.109 | glideosome associated protein with multiple membrane spans 3, putative               |
| PF3D7_0603800 | PVVCY_0100400 | 2.773  | 2.429  | 5.112  | 5.659  | centrosomal protein CEP76, putative                                                  |
| PF3D7_0508500 | PVVCY_1100900 | 2.653  | 1.804  | 4.144  | 4.799  | guanidine nucleotide exchange factor, putative                                       |
| PF3D7_1414600 | PVVCY_1003340 | 6.197  | 6.315  | 6.204  | 5.997  | mRNA-capping enzyme subunit alpha, putative                                          |
| PF3D7_0207100 | PVVCY_0300550 | 5.476  | 5.416  | 5.503  | 6.257  | conserved Plasmodium protein, unknown function                                       |
| PF3D7_0515700 | PVVCY_1101620 | 8.415  | 7.417  | 9.550  | 10.398 | glideosome-associated protein 40, putative                                           |
| PF3D7_1320700 | PVVCY_1402050 | 3.958  | 2.690  | 5.778  | 6.709  | conserved Plasmodium protein, unknown function                                       |
| PF3D7_1121100 | PVVCY_0901910 | 7.048  | 6.422  | 6.376  | 6.873  | conserved Plasmodium protein, unknown function                                       |
| PF3D7_0609800 | PVVCY_0100970 | 6.335  | 5.355  | 7.406  | 8.166  | palmitoyltransferase DHHC2, putative                                                 |
| PF3D7_1124000 | PVVCY_0902200 | 8.128  | 6.796  | 6.661  | 8.236  | endoplasmic reticulum oxidoreductin, putative                                        |
| PF3D7_0929400 | PVVCY_0802780 | 7.848  | 8.980  | 11.624 | 11.377 | high molecular weight rhoptry protein 2, putative                                    |
| PF3D7_0423500 | PVVCY_0502440 | 7.994  | 6.978  | 9.020  | 9.803  | glideosome associated protein with multiple membrane spans 2, putative               |
| PF3D7_0932100 | PVVCY_0803050 | 5.083  | 4.690  | 6.831  | 7.282  | protein MAM3, putative                                                               |
| PF3D7_1449600 | PVVCY_1301490 | 2.396  | 1.915  | 4.351  | 5.270  | conserved Plasmodium protein, unknown function                                       |
| PF3D7_0704800 | PVVCY_1000380 | 3.805  | 2.101  | 4.992  | 6.372  | conserved Plasmodium protein, unknown function                                       |
| PF3D7_1422200 | PVVCY_1002620 | 3.232  | 1.452  | 4.208  | 5.757  | conserved Plasmodium protein, unknown function                                       |
| PF3D7_1409400 | PVVCY_1003850 | 6.957  | 6.396  | 9.049  | 9.627  | conserved Plasmodium protein, unknown function                                       |
| PF3D7_0524200 | PVVCY_1203970 | 6.987  | 6.414  | 5.993  | 6.751  | conserved Plasmodium membrane protein, unknown function                              |
| PF3D7_1467900 | PVVCY_1303370 | 5.295  | 5.573  | 7.235  | 7.442  | rab GTPase activator, putative                                                       |
| PF3D7_1437300 | PVVCY_0601160 | 4.254  | 3.470  | 5.086  | 6.702  | conserved Plasmodium protein, unknown function                                       |

|               |               |       |       |        |        |                                                                        |
|---------------|---------------|-------|-------|--------|--------|------------------------------------------------------------------------|
| PF3D7_1436600 | PVVCY_0800870 | 5.564 | 6.545 | 7.591  | 6.582  | cGMP-dependent protein kinase, putative                                |
| PF3D7_0423500 | PVVCY_0502440 | 7.994 | 6.978 | 9.020  | 9.803  | glideosome associated protein with multiple membrane spans 2, putative |
| PF3D7_0504100 | PVVCY_1100460 | 7.263 | 7.339 | 7.193  | 7.660  | zinc finger protein, putative                                          |
| PF3D7_1017100 | PVVCY_0500180 | 5.703 | 4.126 | 7.138  | 8.690  | rhopty neck protein 12, putative                                       |
| PF3D7_1444200 | PVVCY_1300980 | 2.561 | 2.195 | 1.706  | 3.060  | calmodulin-like protein                                                |
| PF3D7_0932100 | PVVCY_0803050 | 5.083 | 4.690 | 6.831  | 7.282  | protein MAM3, putative                                                 |
| PF3D7_0407800 | PVVCY_0800570 | 4.293 | 3.636 | 6.415  | 7.132  | conserved Plasmodium protein, unknown function                         |
| PF3D7_1223100 | PVVCY_1404010 | 8.710 | 8.303 | 8.999  | 8.970  | CAMP-dependent protein kinase regulatory subunit, putative             |
| PF3D7_1327500 | PVVCY_1304530 | 2.764 | 1.999 | 3.813  | 5.101  | conserved Plasmodium protein, unknown function                         |
| PF3D7_0929400 | PVVCY_0802780 | 7.848 | 8.980 | 11.624 | 11.377 | high molecular weight rhopty protein 2, putative                       |
| PF3D7_1142900 | PVVCY_0904120 | 2.902 | 1.823 | 4.095  | 5.599  | conserved Plasmodium protein, unknown function                         |
| PF3D7_1321100 | PVVCY_1402090 | 0.416 | 0.514 | 0.091  | 0.203  | conserved Plasmodium protein, unknown function                         |
| PF3D7_0522600 | PVVCY_1203810 | 5.474 | 3.704 | 7.159  | 8.319  | inner membrane complex protein, putative                               |
| PF3D7_0929400 | PVVCY_0802780 | 7.848 | 8.980 | 11.624 | 11.377 | high molecular weight rhopty protein 2, putative                       |
| PF3D7_1321600 | PVVCY_1402140 | 0.605 | 0.446 | 1.452  | 1.894  | phosphodiesterase gamma, putative                                      |
| PF3D7_0612700 | PVVCY_0101240 | 7.260 | 5.834 | 9.097  | 9.962  | 6-cysteine protein                                                     |
| PF3D7_1145400 | PVVCY_0904370 | 9.964 | 9.233 | 8.530  | 8.609  | dynammin-like protein, putative                                        |
| PF3D7_0810900 | PVVCY_1402850 | 2.262 | 0.516 | 3.294  | 4.414  | conserved Plasmodium protein, unknown function                         |
| PF3D7_0717200 | PVVCY_0601520 | 3.867 | 3.582 | 5.991  | 6.441  | conserved Plasmodium protein, unknown function                         |
| PF3D7_1323700 | PVVCY_1304150 | 8.591 | 7.303 | 9.684  | 10.360 | glideosome associated protein with multiple membrane spans 1, putative |
| PF3D7_0525200 | PVVCY_1204070 | 4.491 | 4.793 | 5.936  | 6.151  | structural maintenance of chromosomes protein 6, putative              |
| PF3D7_0621100 | PVVCY_1102110 | 3.876 | 3.788 | 6.258  | 6.432  | conserved Plasmodium protein, unknown function                         |
| PF3D7_1129300 | PVVCY_0902800 | 1.909 | 1.342 | 3.613  | 4.149  | conserved Plasmodium protein, unknown function                         |
| PF3D7_0828600 | PVVCY_0700200 | 3.746 | 2.009 | 4.611  | 5.770  | folate transporter 1, putative                                         |
| PF3D7_0525200 | PVVCY_1204070 | 4.491 | 4.793 | 5.936  | 6.151  | structural maintenance of chromosomes protein 6, putative              |
| PF3D7_1223100 | PVVCY_1404010 | 8.710 | 8.303 | 8.999  | 8.970  | CAMP-dependent protein kinase regulatory subunit, putative             |
| PF3D7_1118400 | PVVCY_0901660 | 5.293 | 5.209 | 6.146  | 6.916  | haloacid dehalogenase-like hydrolase, putative                         |
| PF3D7_0905400 | PVVCY_0401710 | 8.043 | 9.297 | 11.695 | 11.433 | high molecular weight rhopty protein 3, putative                       |
| PF3D7_0522400 | PVVCY_1203790 | 2.668 | 2.067 | 4.159  | 5.281  | conserved Plasmodium protein, unknown function                         |
| PF3D7_0905400 | PVVCY_0401710 | 8.043 | 9.297 | 11.695 | 11.433 | high molecular weight rhopty protein 3, putative                       |
| PF3D7_1420200 | PVVCY_1002790 | 3.211 | 4.264 | 6.134  | 6.088  | tetratricopeptide repeat protein, putative                             |
| PF3D7_1329900 | PVVCY_1304760 | 3.597 | 3.599 | 2.260  | 2.600  | conserved Plasmodium protein, unknown function                         |
| PF3D7_1235200 | PVVCY_1405190 | 1.619 | 1.185 | 1.874  | 1.908  | inorganic pyrophosphatase, putative                                    |
| PF3D7_0802800 | PVVCY_1202840 | 7.382 | 7.609 | 7.886  | 7.351  | serine_threonine protein phosphatase 2B catalytic subunit A, putative  |

|               |               |        |        |        |        |                                                                        |
|---------------|---------------|--------|--------|--------|--------|------------------------------------------------------------------------|
| PF3D7_1323700 | PVVCY_1304150 | 8.591  | 7.303  | 9.684  | 10.360 | glideosome associated protein with multiple membrane spans 1, putative |
| PF3D7_0407800 | PVVCY_0800570 | 4.293  | 3.636  | 6.415  | 7.132  | conserved Plasmodium protein, unknown function                         |
| PF3D7_1436600 | PVVCY_0800870 | 5.564  | 6.545  | 7.591  | 6.582  | cGMP-dependent protein kinase, putative                                |
| PF3D7_1313600 | PVVCY_1401250 | 2.593  | 1.112  | 3.776  | 4.938  | conserved Plasmodium protein, unknown function                         |
| PF3D7_0313400 | PVVCY_0401220 | 5.429  | 5.558  | 5.424  | 4.979  | conserved Plasmodium protein, unknown function                         |
| PF3D7_1113000 | PVVCY_0901160 | 0.160  | 0.412  | 0.359  | 0.325  | conserved Plasmodium protein, unknown function                         |
| PF3D7_0714000 | PVVCY_1402210 | 11.219 | 10.563 | 11.998 | 12.904 | histone H2B variant, putative                                          |
| PF3D7_1232500 | PVVCY_1404930 | 3.650  | 2.778  | 4.968  | 5.901  | CG2-related protein, putative                                          |
| PF3D7_1472600 | PVVCY_1303830 | 4.186  | 2.662  | 5.213  | 6.494  | protein disulfide-isomerase, putative                                  |
| PF3D7_0934800 | PVVCY_0803320 | 9.125  | 8.771  | 9.467  | 9.563  | cAMP-dependent protein kinase catalytic subunit, putative              |
| PF3D7_0522400 | PVVCY_1203790 | 2.668  | 2.067  | 4.159  | 5.281  | conserved Plasmodium protein, unknown function                         |
| PF3D7_1206400 | PVVCY_0600540 | 4.536  | 4.541  | 4.292  | 4.600  | rhodanese like protein, putative                                       |
| PF3D7_0717200 | PVVCY_0601520 | 3.867  | 3.582  | 5.991  | 6.441  | conserved Plasmodium protein, unknown function                         |
| PF3D7_1345600 | PVVCY_1306160 | 5.547  | 3.216  | 6.548  | 8.080  | inner membrane complex protein, putative                               |
| PF3D7_1140400 | PVVCY_0903880 | 1.421  | 2.129  | 3.372  | 3.273  | conserved Plasmodium protein, unknown function                         |
| PF3D7_0522400 | PVVCY_1203790 | 2.668  | 2.067  | 4.159  | 5.281  | conserved Plasmodium protein, unknown function                         |
| PF3D7_1348600 | PVVCY_1306450 | 3.159  | 2.681  | 5.235  | 6.381  | conserved Plasmodium protein, unknown function                         |
| PF3D7_0917300 | PVVCY_0801570 | 3.771  | 2.316  | 5.568  | 6.358  | conserved Plasmodium protein, unknown function                         |
| PF3D7_0722200 | PVVCY_0602000 | 7.897  | 5.569  | 9.391  | 10.709 | rhopty-associated leucine zipper-like protein 1, putative              |
| PF3D7_0717500 | PVVCY_0601550 | 5.174  | 4.174  | 6.772  | 7.263  | calcium-dependent protein kinase 4, putative                           |
| PF3D7_1345600 | PVVCY_1306160 | 5.547  | 3.216  | 6.548  | 8.080  | inner membrane complex protein, putative                               |
| PF3D7_1452000 | PVVCY_1301730 | 6.150  | 4.105  | 7.722  | 8.766  | rhopty neck protein 2, putative                                        |
| PF3D7_1361400 | PVVCY_1103860 | 3.373  | 2.286  | 2.754  | 3.204  | actin-depolymerizing factor 2, putative                                |
| PF3D7_1136200 | PVVCY_0903470 | 4.593  | 3.037  | 6.248  | 7.284  | conserved Plasmodium protein, unknown function                         |
| PF3D7_1427200 | PVVCY_1002230 | 5.423  | 5.809  | 6.573  | 7.068  | selenoprotein, putative                                                |
| PF3D7_1410400 | PVVCY_1003750 | 7.956  | 6.060  | 9.595  | 10.818 | rhopty-associated protein 1, putative                                  |
| PF3D7_1433300 | PVVCY_1001640 | 4.190  | 5.081  | 6.931  | 6.871  | chromatin assembly factor 1 P55 subunit, putative                      |
| PF3D7_1410400 | PVVCY_1003750 | 7.956  | 6.060  | 9.595  | 10.818 | rhopty-associated protein 1, putative                                  |
| PF3D7_0722200 | PVVCY_0602000 | 7.897  | 5.569  | 9.391  | 10.709 | rhopty-associated leucine zipper-like protein 1, putative              |
| PF3D7_1426700 | PVVCY_1002280 | 5.646  | 6.074  | 6.418  | 5.461  | phosphoenolpyruvate carboxylase, putative                              |
| PF3D7_1463900 | PVVCY_1302950 | 5.542  | 3.474  | 6.822  | 7.943  | conserved Plasmodium protein, unknown function                         |
| PF3D7_1012200 | PVVCY_1201140 | 5.589  | 4.002  | 7.045  | 8.385  | rhopty associated adhesin, putative                                    |
| PF3D7_1009700 | PVVCY_1200880 | 1.345  | 0.967  | 0.826  | 1.694  | tubulin-tyrosine ligase, putative                                      |
| PF3D7_1118400 | PVVCY_0901660 | 5.293  | 5.209  | 6.146  | 6.916  | haloacid dehalogenase-like hydrolase, putative                         |
| PF3D7_1436600 | PVVCY_0800870 | 5.564  | 6.545  | 7.591  | 6.582  | cGMP-dependent protein kinase, putative                                |

|               |               |        |        |        |        |                                                            |
|---------------|---------------|--------|--------|--------|--------|------------------------------------------------------------|
| PF3D7_1206000 | PVVCY_0600510 | 6.443  | 7.057  | 6.777  | 5.597  | shewanella-like protein phosphatase 2, putative            |
| PF3D7_0320900 | PVVCY_1201850 | 11.783 | 10.978 | 12.207 | 12.893 | histone H2A variant, putative                              |
| PF3D7_1003000 | PVVCY_1200200 | 4.041  | 2.147  | 5.104  | 6.262  | conserved Plasmodium protein, unknown function             |
| PF3D7_0722200 | PVVCY_0602000 | 7.897  | 5.569  | 9.391  | 10.709 | rhoptry-associated leucine zipper-like protein 1, putative |
| PF3D7_0404700 | PVVCY_0800270 | 4.695  | 2.726  | 5.976  | 7.156  | dipeptidyl aminopeptidase 3, putative                      |
| PF3D7_0802600 | PVVCY_1202860 | 5.884  | 4.707  | 5.062  | 6.631  | adenylyl cyclase beta, putative                            |
| PF3D7_0405900 | PVVCY_0800390 | 4.421  | 2.666  | 5.942  | 7.245  | apical sushi protein, putative                             |
| PF3D7_1365600 | PVVCY_1104250 | 2.478  | 1.252  | 1.907  | 2.861  | conserved Plasmodium protein, unknown function             |
| PF3D7_1435300 | PVVCY_0801000 | 3.374  | 2.239  | 4.142  | 5.046  | NAD(P)H-dependent glutamate synthase, putative             |
| PF3D7_0628100 | PVVCY_1102800 | 2.842  | 1.701  | 3.797  | 4.992  | HECT-domain (ubiquitin-transferase), putative              |
| PF3D7_0404700 | PVVCY_0800270 | 4.695  | 2.726  | 5.976  | 7.156  | dipeptidyl aminopeptidase 3, putative                      |
| PF3D7_0628100 | PVVCY_1102800 | 2.842  | 1.701  | 3.797  | 4.992  | HECT-domain (ubiquitin-transferase), putative              |
| PF3D7_0628100 | PVVCY_1102800 | 2.842  | 1.701  | 3.797  | 4.992  | HECT-domain (ubiquitin-transferase), putative              |
| PF3D7_0419700 | PVVCY_0702150 | 4.270  | 2.575  | 5.812  | 7.329  | apical merozoite protein, putative                         |
| PF3D7_0920500 | PVVCY_0801880 | 4.879  | 4.741  | 4.483  | 4.644  | ADP-ribosylation factor, putative                          |
| PF3D7_1145000 | PVVCY_0904330 | 0.197  | 0.059  | 0.742  | 1.029  | conserved Plasmodium protein, unknown function             |
| PF3D7_0802600 | PVVCY_1202860 | 5.884  | 4.707  | 5.062  | 6.631  | adenylyl cyclase beta, putative                            |
| PF3D7_0628100 | PVVCY_1102800 | 2.842  | 1.701  | 3.797  | 4.992  | HECT-domain (ubiquitin-transferase), putative              |
| PF3D7_0723300 | PVVCY_0602110 | 1.860  | 1.257  | 1.440  | 1.809  | conserved Plasmodium protein, unknown function             |
| PF3D7_0828700 | PVVCY_0700190 | 3.106  | 2.849  | 2.407  | 3.181  | conserved Plasmodium protein, unknown function             |
| PF3D7_1217400 | PVVCY_1403520 | 3.635  | 3.333  | 3.760  | 4.916  | conserved Plasmodium protein, unknown function             |
| PF3D7_0810300 | PVVCY_1402910 | 5.807  | 6.355  | 7.474  | 7.390  | protein phosphatase PPM5, putative                         |
| PF3D7_1222700 | PVVCY_1403970 | 8.914  | 7.804  | 9.302  | 10.613 | glideosome-associated protein 45, putative                 |
| PF3D7_0628100 | PVVCY_1102800 | 2.842  | 1.701  | 3.797  | 4.992  | HECT-domain (ubiquitin-transferase), putative              |
| PF3D7_1137200 | PVVCY_0903570 | 3.322  | 1.961  | 4.432  | 5.763  | apical exonemal protein, putative                          |
| PF3D7_0628100 | PVVCY_1102800 | 2.842  | 1.701  | 3.797  | 4.992  | HECT-domain (ubiquitin-transferase), putative              |
| PF3D7_1237400 | PVVCY_1405420 | 4.660  | 4.879  | 6.454  | 7.236  | conserved Plasmodium protein, unknown function             |
| PF3D7_0811600 | PVVCY_1402780 | 5.767  | 4.132  | 7.377  | 8.370  | conserved Plasmodium protein, unknown function             |
| PF3D7_1430200 | PVVCY_1001930 | 4.778  | 3.049  | 6.284  | 7.386  | plasmepsin IX, putative                                    |
| PF3D7_0628100 | PVVCY_1102800 | 2.842  | 1.701  | 3.797  | 4.992  | HECT-domain (ubiquitin-transferase), putative              |
| PF3D7_1361800 | PVVCY_1103890 | 4.590  | 6.190  | 8.103  | 7.274  | conserved Plasmodium protein, unknown function             |
| PF3D7_1113000 | PVVCY_0901160 | 0.160  | 0.412  | 0.359  | 0.325  | conserved Plasmodium protein, unknown function             |
| PF3D7_0628100 | PVVCY_1102800 | 2.842  | 1.701  | 3.797  | 4.992  | HECT-domain (ubiquitin-transferase), putative              |
| PF3D7_0628100 | PVVCY_1102800 | 2.842  | 1.701  | 3.797  | 4.992  | HECT-domain (ubiquitin-transferase), putative              |
| PF3D7_0407700 | PVVCY_0800560 | 5.826  | 5.834  | 6.365  | 5.652  | conserved Plasmodium protein, unknown function             |
| PF3D7_0217500 | PVVCY_0301510 | 5.808  | 5.960  | 7.984  | 8.415  | calcium-dependent protein kinase 1, putative               |
| PF3D7_0612600 | PVVCY_0101230 | 6.252  | 5.780  | 4.860  | 5.543  | cytoplasmic tRNA 2-thiolation protein 1, putative          |

|               |               |       |       |       |       |                                                      |
|---------------|---------------|-------|-------|-------|-------|------------------------------------------------------|
| PF3D7_0628100 | PVVCY_1102800 | 2.842 | 1.701 | 3.797 | 4.992 | HECT-domain (ubiquitin-transferase), putative        |
| PF3D7_0628100 | PVVCY_1102800 | 2.842 | 1.701 | 3.797 | 4.992 | HECT-domain (ubiquitin-transferase), putative        |
| PF3D7_0628100 | PVVCY_1102800 | 2.842 | 1.701 | 3.797 | 4.992 | HECT-domain (ubiquitin-transferase), putative        |
| PF3D7_0920500 | PVVCY_0801880 | 4.879 | 4.741 | 4.483 | 4.644 | ADP-ribosylation factor, putative                    |
| PF3D7_1361400 | PVVCY_1103860 | 3.373 | 2.286 | 2.754 | 3.204 | actin-depolymerizing factor 2, putative              |
| PF3D7_0321400 | PVVCY_1201800 | 4.471 | 3.571 | 7.012 | 7.542 | protein kinase, putative                             |
| PF3D7_0613600 | PVVCY_0101320 | 4.268 | 1.975 | 4.855 | 6.574 | conserved Plasmodium protein, unknown function       |
| PF3D7_1116000 | PVVCY_0901420 | 6.313 | 4.497 | 8.329 | 9.175 | rhoptry neck protein 4, putative                     |
| PF3D7_0628100 | PVVCY_1102800 | 2.842 | 1.701 | 3.797 | 4.992 | HECT-domain (ubiquitin-transferase), putative        |
| PF3D7_1228200 | PVVCY_1404500 | 4.689 | 4.805 | 4.260 | 3.140 | conserved Plasmodium protein, unknown function       |
| PF3D7_0628100 | PVVCY_1102800 | 2.842 | 1.701 | 3.797 | 4.992 | HECT-domain (ubiquitin-transferase), putative        |
| PF3D7_1469200 | PVVCY_1303490 | 5.603 | 5.894 | 6.291 | 6.333 | shewanella-like protein phosphatase 1, putative      |
| PF3D7_1224200 | PVVCY_1404120 | 4.979 | 4.690 | 5.064 | 5.742 | BRO1 domain-containing protein, putative             |
| PF3D7_0618000 | PVVCY_1101800 | 4.408 | 2.097 | 5.434 | 6.981 | conserved Plasmodium protein, unknown function       |
| PF3D7_1113000 | PVVCY_0901160 | 0.160 | 0.412 | 0.359 | 0.325 | conserved Plasmodium protein, unknown function       |
| PF3D7_1415100 | PVVCY_1003290 | 2.039 | 0.762 | 2.422 | 3.570 | conserved Plasmodium protein, unknown function       |
| PF3D7_1459900 | PVVCY_1302500 | 3.252 | 2.036 | 4.541 | 5.663 | conserved Plasmodium protein, unknown function       |
| PF3D7_0920500 | PVVCY_0801880 | 4.879 | 4.741 | 4.483 | 4.644 | ADP-ribosylation factor, putative                    |
| PF3D7_1031200 | PVVCY_0501570 | 4.319 | 2.748 | 5.398 | 6.655 | MORN repeat-containing protein 1, putative           |
| PF3D7_0606200 | PVVCY_0100630 | 8.152 | 7.983 | 8.098 | 8.143 | ubiquitin-conjugating enzyme E2, putative            |
| PF3D7_0315900 | PVVCY_0401480 | 0.793 | 1.164 | 0.815 | 1.039 | conserved Plasmodium protein, unknown function       |
| PF3D7_1318000 | PVVCY_1401810 | 3.896 | 2.878 | 5.247 | 6.486 | conserved Plasmodium protein, unknown function       |
| PF3D7_0802600 | PVVCY_1202860 | 5.884 | 4.707 | 5.062 | 6.631 | adenylyl cyclase beta, putative                      |
| PF3D7_1459400 | PVVCY_1302450 | 6.872 | 7.100 | 6.953 | 6.477 | conserved Plasmodium protein, unknown function       |
| PF3D7_0528400 | PVVCY_1204390 | 5.230 | 3.279 | 6.379 | 7.592 | palmitoyltransferase DHHC7, putative                 |
| PF3D7_1019900 | PVVCY_0500460 | 5.860 | 5.459 | 6.601 | 7.448 | autophagy-related protein 8, putative                |
| PF3D7_1413700 | PVVCY_1003440 | 4.812 | 2.557 | 4.827 | 6.594 | conserved Plasmodium protein, unknown function       |
| PF3D7_1224700 | PVVCY_1404170 | 3.955 | 4.890 | 6.206 | 5.744 | conserved Plasmodium protein, unknown function       |
| PF3D7_1031200 | PVVCY_0501570 | 4.319 | 2.748 | 5.398 | 6.655 | MORN repeat-containing protein 1, putative           |
| PF3D7_1461400 | PVVCY_1302660 | 4.078 | 3.101 | 2.952 | 3.901 | conserved Plasmodium protein, unknown function       |
| PF3D7_0522100 | PVVCY_1203760 | 5.431 | 3.506 | 6.033 | 7.359 | conserved Plasmodium protein, unknown function       |
| PF3D7_0931900 | PVVCY_0803030 | 2.626 | 2.436 | 2.343 | 3.007 | adenylate kinase-like protein 2, putative            |
| PF3D7_0920700 | PVVCY_0801900 | 6.879 | 7.147 | 6.515 | 6.412 | conserved Plasmodium protein, unknown function       |
| PF3D7_1440900 | PVVCY_1300650 | 2.852 | 2.416 | 5.228 | 5.810 | conserved Plasmodium protein, unknown function       |
| PF3D7_1309300 | PVVCY_1400950 | 7.132 | 7.055 | 6.814 | 7.082 | U4_U6 small nuclear ribonucleoprotein PRP3, putative |
| PF3D7_1133400 | PVVCY_0903210 | 6.967 | 4.024 | 7.739 | 9.340 | apical membrane antigen 1, putative                  |
| PF3D7_0802600 | PVVCY_1202860 | 5.884 | 4.707 | 5.062 | 6.631 | adenylyl cyclase beta, putative                      |

|               |               |        |        |        |        |                                                                |
|---------------|---------------|--------|--------|--------|--------|----------------------------------------------------------------|
| PF3D7_1252200 | PVVCY_1000160 | 2.278  | 1.346  | 1.727  | 2.235  | chitinase, putative                                            |
| PF3D7_1416100 | PVVCY_1003190 | 8.317  | 7.768  | 7.221  | 7.650  | protein SEY1, putative                                         |
| PF3D7_1328800 | PVVCY_1304640 | 5.951  | 5.664  | 5.185  | 5.382  | transcriptional regulatory protein sir2<br>homologue, putative |
| PF3D7_1127600 | PVVCY_0902560 | 9.919  | 9.451  | 8.712  | 8.739  | CRAL_TRIO domain-containing protein,<br>putative               |
| PF3D7_1332200 | PVVCY_1304970 | 6.179  | 3.447  | 6.960  | 8.377  | conserved Plasmodium protein, unknown<br>function              |
| PF3D7_0111000 | PVVCY_0200250 | 2.622  | 1.542  | 2.081  | 2.560  | kinesin-8, putative                                            |
| PF3D7_0404000 | PVVCY_0800200 | 4.453  | 1.005  | 5.442  | 6.290  | conserved Plasmodium protein, unknown<br>function              |
| PF3D7_1461400 | PVVCY_1302660 | 4.078  | 3.101  | 2.952  | 3.901  | conserved Plasmodium protein, unknown<br>function              |
| PF3D7_0814400 | PVVCY_1402490 | 2.824  | 2.301  | 4.275  | 4.940  | phospholipase, putative                                        |
| PF3D7_1358700 | PVVCY_1103620 | 10.465 | 10.463 | 9.754  | 9.885  | HVA22-like protein, putative                                   |
| PF3D7_0814400 | PVVCY_1402490 | 2.824  | 2.301  | 4.275  | 4.940  | phospholipase, putative                                        |
| PF3D7_0816100 | PVVCY_0701450 | 6.367  | 6.271  | 5.896  | 5.548  | phosphopantothencycysteine decarboxylase,<br>putative          |
| PF3D7_1365700 | PVVCY_1104260 | 7.994  | 7.623  | 7.883  | 8.442  | SNARE associated Golgi protein, putative                       |
| PF3D7_1359900 | PVVCY_1103730 | 6.535  | 6.112  | 6.688  | 6.553  | conserved Plasmodium protein, unknown<br>function              |
| PF3D7_1332200 | PVVCY_1304970 | 6.179  | 3.447  | 6.960  | 8.377  | conserved Plasmodium protein, unknown<br>function              |
| PF3D7_1037500 | PVVCY_0502080 | 4.958  | 5.007  | 7.066  | 7.350  | dynamin-like protein, putative                                 |
| PF3D7_1037500 | PVVCY_0502080 | 4.958  | 5.007  | 7.066  | 7.350  | dynamin-like protein, putative                                 |
| PF3D7_1028700 | PVVCY_0501330 | 6.518  | 5.125  | 7.076  | 8.439  | merozoite TRAP-like protein, putative                          |
| PF3D7_0318500 | PVVCY_1000840 | 2.786  | 3.822  | 4.927  | 4.385  | conserved Plasmodium protein, unknown<br>function              |
| PF3D7_0508600 | PVVCY_1100910 | 4.980  | 5.108  | 5.471  | 6.061  | conserved Plasmodium protein, unknown<br>function              |
| PF3D7_0613900 | PVVCY_0101350 | 5.957  | 3.192  | 6.645  | 8.148  | myosin-like protein, putative                                  |
| PF3D7_0525300 | PVVCY_1204080 | 5.474  | 4.714  | 5.118  | 6.536  | conserved Plasmodium protein, unknown<br>function              |
| PF3D7_0525300 | PVVCY_1204080 | 5.474  | 4.714  | 5.118  | 6.536  | conserved Plasmodium protein, unknown<br>function              |
| PF3D7_1303500 | PVVCY_1400370 | 6.022  | 5.294  | 6.721  | 7.189  | sodium_hydrogen exchanger, Na+, H+<br>antiporter, putative     |
| PF3D7_0503600 | PVVCY_1100420 | 4.509  | 2.340  | 4.657  | 6.358  | myosin B, putative                                             |
| PF3D7_0407900 | PVVCY_0800580 | 3.818  | 5.139  | 5.553  | 4.989  | AAA family ATPase, putative                                    |
| PF3D7_1359900 | PVVCY_1103730 | 6.535  | 6.112  | 6.688  | 6.553  | conserved Plasmodium protein, unknown<br>function              |
| PF3D7_1037400 | PVVCY_0502070 | 4.604  | 4.798  | 5.027  | 5.071  | conserved Plasmodium protein, unknown<br>function              |
| PF3D7_1229800 | PVVCY_1404660 | 3.579  | 1.826  | 4.452  | 5.735  | myosin D, putative                                             |
| PF3D7_1350500 | PVVCY_1306630 | 7.299  | 6.711  | 8.268  | 9.030  | conserved Plasmodium protein, unknown<br>function              |
| PF3D7_0808300 | PVVCY_1202330 | 7.865  | 8.075  | 8.198  | 7.580  | ubiquitin regulatory protein, putative                         |
| PF3D7_1016000 | PVVCY_1201520 | 5.717  | 5.018  | 5.513  | 6.295  | conserved Plasmodium protein, unknown<br>function              |
| PF3D7_1014100 | PVVCY_1201330 | 6.284  | 3.471  | 6.855  | 8.381  | conserved Plasmodium protein, unknown<br>function              |
| PF3D7_1348900 | PVVCY_1306480 | 4.918  | 5.131  | 3.557  | 4.281  | conserved Plasmodium protein, unknown<br>function              |
| PF3D7_0628300 | PVVCY_1102820 | 11.581 | 10.314 | 11.070 | 12.180 | choline_ethanolaminephosphotransferase,<br>putative            |

|               |               |       |       |       |        |                                                                                        |
|---------------|---------------|-------|-------|-------|--------|----------------------------------------------------------------------------------------|
| PF3D7_0730400 | PVVCY_0201420 | 5.836 | 6.695 | 8.237 | 8.677  | conserved Plasmodium protein, unknown function                                         |
| PF3D7_1425500 | PVVCY_1002390 | 3.169 | 2.014 | 2.194 | 3.370  | conserved Plasmodium protein, unknown function                                         |
| PF3D7_0903600 | PVVCY_0401890 | 4.212 | 2.733 | 6.056 | 7.293  | conserved Plasmodium protein, unknown function                                         |
| PF3D7_0507400 | PVVCY_1100790 | 3.407 | 1.515 | 3.523 | 5.243  | conserved Plasmodium protein, unknown function                                         |
| PF3D7_1468400 | PVVCY_1303420 | 5.498 | 3.299 | 6.477 | 7.991  | zinc finger protein, putative                                                          |
| PF3D7_1246400 | PVVCY_1406160 | 8.717 | 7.251 | 8.888 | 10.350 | myosin light chain 1, putative myosin A tail domain interacting protein MTIP, putative |
| PF3D7_0903600 | PVVCY_0401890 | 4.212 | 2.733 | 6.056 | 7.293  | conserved Plasmodium protein, unknown function                                         |
| PF3D7_0911100 | PVVCY_1001400 | 5.833 | 2.931 | 6.398 | 7.986  | conserved Plasmodium protein, unknown function                                         |
| PF3D7_0528300 | PVVCY_1204380 | 3.077 | 1.415 | 4.037 | 5.390  | conserved Plasmodium protein, unknown function                                         |
| PF3D7_0924000 | PVVCY_0802240 | 7.224 | 6.839 | 6.841 | 7.062  | patatin-like phospholipase, putative                                                   |
| PF3D7_1014100 | PVVCY_1201330 | 6.284 | 3.471 | 6.855 | 8.381  | conserved Plasmodium protein, unknown function                                         |
| PF3D7_1251200 | PVVCY_1406620 | 0.119 | 0.326 | 0.485 | 0.605  | coronin, putative                                                                      |
| PF3D7_1023000 | PVVCY_0500770 | 5.503 | 4.453 | 5.848 | 7.105  | conserved Plasmodium protein, unknown function                                         |
| PF3D7_1231400 | PVVCY_1404820 | 4.035 | 2.507 | 4.284 | 5.735  | amino acid transporter, putative                                                       |
| PF3D7_1428500 | PVVCY_1002110 | 2.266 | 3.682 | 3.982 | 3.219  | protein kinase, putative                                                               |
| PF3D7_0903600 | PVVCY_0401890 | 4.212 | 2.733 | 6.056 | 7.293  | conserved Plasmodium protein, unknown function                                         |
| PF3D7_1030200 | PVVCY_0501470 | 4.561 | 2.579 | 5.643 | 6.675  | conserved Plasmodium protein, unknown function                                         |
| PF3D7_1365800 | PVVCY_1104270 | 7.064 | 6.931 | 6.857 | 7.067  | conserved Plasmodium protein, unknown function                                         |
| PF3D7_1421100 | PVVCY_1002700 | 6.219 | 6.833 | 7.059 | 6.209  | conserved Plasmodium protein, unknown function                                         |
| PF3D7_0930500 | PVVCY_0802890 | 5.561 | 3.287 | 6.532 | 7.984  | diacylglycerol kinase, putative                                                        |
| PF3D7_0930100 | PVVCY_0802850 | 6.269 | 6.603 | 6.644 | 5.515  | conserved Plasmodium protein, unknown function                                         |
| PF3D7_0212600 | PVVCY_0301040 | 5.519 | 2.650 | 5.991 | 7.611  | secreted protein with altered thrombospondin repeat domain, putative                   |
| PF3D7_1361100 | PVVCY_1103830 | 8.566 | 7.993 | 8.374 | 8.287  | protein transport protein Sec24A, putative                                             |
| PF3D7_1307500 | PVVCY_1400770 | 1.623 | 0.000 | 3.866 | 4.592  | conserved Plasmodium protein, unknown function                                         |
| PF3D7_1231200 | PVVCY_1404800 | 5.227 | 3.923 | 5.636 | 7.256  | conserved Plasmodium protein, unknown function                                         |
| PF3D7_0418600 | PVVCY_0702040 | 3.980 | 2.123 | 3.908 | 5.914  | regulator of chromosome condensation, putative                                         |
| PF3D7_0316000 | PVVCY_0401490 | 1.056 | 2.327 | 1.502 | 1.449  | microneme associated antigen, putative                                                 |
| PF3D7_1425400 | PVVCY_1002400 | 2.518 | 2.900 | 4.439 | 4.516  | DEAD_DEAH box helicase, putative                                                       |
| PF3D7_0304100 | PVVCY_0400330 | 7.168 | 5.876 | 7.170 | 8.314  | inner membrane complex protein 1e, putative                                            |
| PF3D7_1351700 | PVVCY_1306740 | 5.878 | 3.328 | 6.562 | 8.080  | inner membrane complex protein 1f, putative                                            |
| PF3D7_0414900 | PVVCY_0701670 | 7.138 | 4.566 | 8.209 | 9.363  | armadillo-domain containing rhopty protein, putative                                   |
| PF3D7_0214700 | PVVCY_0301240 | 5.160 | 3.346 | 5.873 | 7.408  | conserved Plasmodium protein, unknown function                                         |
| PF3D7_0525800 | PVVCY_1204130 | 8.048 | 5.517 | 8.588 | 10.416 | inner membrane complex protein 1g, putative                                            |
| PF3D7_0919200 | PVVCY_0801750 | 4.958 | 3.598 | 5.077 | 6.581  | PPPDE peptidase, putative                                                              |
| PF3D7_0316000 | PVVCY_0401490 | 1.056 | 2.327 | 1.502 | 1.449  | microneme associated antigen, putative                                                 |



|               |               |        |       |       |        |                                                           |
|---------------|---------------|--------|-------|-------|--------|-----------------------------------------------------------|
| PF3D7_0930100 | PVVCY_0802850 | 6.269  | 6.603 | 6.644 | 5.515  | conserved Plasmodium protein, unknown function            |
| PF3D7_0109000 | PVVCY_0200440 | 8.107  | 5.509 | 8.563 | 10.425 | photosensitized INA-labeled protein PHIL1, putative       |
| PF3D7_0822600 | PVVCY_0700790 | 8.856  | 8.414 | 8.531 | 8.587  | protein transport protein SEC23, putative                 |
| PF3D7_1209600 | PVVCY_0600830 | 0.542  | 0.246 | 0.527 | 0.814  | porphobilinogen deaminase, putative                       |
| PF3D7_0308700 | PVVCY_0400760 | 5.100  | 2.387 | 5.741 | 7.207  | conserved Plasmodium protein, unknown function            |
| PF3D7_1365800 | PVVCY_1104270 | 7.064  | 6.931 | 6.857 | 7.067  | conserved Plasmodium protein, unknown function            |
| PF3D7_0924000 | PVVCY_0802240 | 7.224  | 6.839 | 6.841 | 7.062  | patatin-like phospholipase, putative                      |
| PF3D7_0217300 | PVVCY_0301490 | 6.942  | 6.479 | 6.239 | 7.130  | AP-2 complex subunit sigma, putative                      |
| PF3D7_1010300 | PVVCY_1200950 | 10.278 | 8.315 | 9.168 | 11.757 | succinate dehydrogenase subunit 4, putative               |
| PF3D7_1003600 | PVVCY_1200260 | 8.178  | 6.668 | 8.552 | 10.204 | inner membrane complex protein 1c, putative               |
| PF3D7_0507500 | PVVCY_1100800 | 5.926  | 3.607 | 6.461 | 8.038  | subtilisin-like protease 1, putative                      |
| PF3D7_0109100 | PVVCY_0200430 | 6.419  | 5.678 | 5.492 | 5.914  | LCCL domain-containing protein                            |
| PF3D7_0321900 | PVVCY_1201740 | 6.000  | 5.845 | 6.339 | 6.264  | cyclic amine resistance locus protein, putative           |
| PF3D7_1310700 | PVVCY_1401090 | 8.117  | 5.480 | 8.671 | 10.224 | RNA-binding protein, putative                             |
| PF3D7_0930500 | PVVCY_0802890 | 5.561  | 3.287 | 6.532 | 7.984  | diacylglycerol kinase, putative                           |
| PF3D7_0724900 | PVVCY_0602280 | 4.648  | 3.671 | 3.825 | 4.165  | kinesin-19, putative                                      |
| PF3D7_0620400 | PVVCY_1102040 | 5.092  | 3.206 | 6.254 | 7.378  | merozoite surface protein 10, putative                    |
| PF3D7_0206200 | PVVCY_0300480 | 4.454  | 2.937 | 5.287 | 6.487  | pantothenate transporter, putative                        |
| PF3D7_1316200 | PVVCY_1401630 | 3.764  | 5.282 | 6.290 | 6.406  | ADP-ribosylation factor, putative                         |
| PF3D7_0911100 | PVVCY_1001400 | 5.833  | 2.931 | 6.398 | 7.986  | conserved Plasmodium protein, unknown function            |
| PF3D7_1251200 | PVVCY_1406620 | 0.119  | 0.326 | 0.485 | 0.605  | coronin, putative                                         |
| PF3D7_1218000 | PVVCY_1403580 | 3.781  | 2.163 | 4.555 | 6.155  | thrombospondin-related apical membrane protein, putative  |
| PF3D7_1342500 | PVVCY_1305870 | 2.123  | 1.058 | 2.063 | 3.283  | sporozoite protein essential for cell traversal, putative |
| PF3D7_0403800 | PVVCY_0800180 | 5.276  | 3.728 | 6.684 | 7.635  | alpha_beta hydrolase, putative                            |
| PF3D7_0805300 | PVVCY_1202620 | 3.532  | 2.809 | 2.504 | 3.146  | conserved Plasmodium protein, unknown function            |
| PF3D7_0911100 | PVVCY_1001400 | 5.833  | 2.931 | 6.398 | 7.986  | conserved Plasmodium protein, unknown function            |
| PF3D7_0705500 | PVVCY_1000450 | 7.359  | 6.857 | 7.037 | 6.802  | inositol-phosphate phosphatase, putative                  |
| PF3D7_0503600 | PVVCY_1100420 | 4.509  | 2.340 | 4.657 | 6.358  | myosin B, putative                                        |
| PF3D7_0705500 | PVVCY_1000450 | 7.359  | 6.857 | 7.037 | 6.802  | inositol-phosphate phosphatase, putative                  |
| PF3D7_0705500 | PVVCY_1000450 | 7.359  | 6.857 | 7.037 | 6.802  | inositol-phosphate phosphatase, putative                  |
| PF3D7_1412800 | PVVCY_1003520 | 7.088  | 7.514 | 7.344 | 6.484  | glycylpeptide N-tetradecanoyltransferase, putative        |
| PF3D7_0109100 | PVVCY_0200430 | 6.419  | 5.678 | 5.492 | 5.914  | LCCL domain-containing protein                            |
| PF3D7_0724900 | PVVCY_0602280 | 4.648  | 3.671 | 3.825 | 4.165  | kinesin-19, putative                                      |
| PF3D7_0818100 | PVVCY_0701250 | 4.622  | 2.265 | 5.078 | 6.589  | zinc finger protein, putative                             |
| PF3D7_1218300 | PVVCY_1403610 | 5.799  | 5.435 | 5.239 | 6.045  | AP-2 complex subunit mu, putative                         |
| PF3D7_1125800 | PVVCY_0902390 | 4.901  | 5.917 | 8.610 | 8.391  | kelch domain-containing protein, putative                 |
| PF3D7_0503600 | PVVCY_1100420 | 4.509  | 2.340 | 4.657 | 6.358  | myosin B, putative                                        |
| PF3D7_0323400 | PVVCY_1201590 | 4.209  | 2.231 | 4.877 | 6.458  | Rh5 interacting protein, putative                         |

|               |               |        |        |        |        |                                                                              |
|---------------|---------------|--------|--------|--------|--------|------------------------------------------------------------------------------|
| PF3D7_0913800 | PVVCY_0801220 | 9.328  | 6.749  | 9.939  | 11.729 | conserved Plasmodium protein, unknown function                               |
| PF3D7_1246300 | PVVCY_1406150 | 6.610  | 6.085  | 6.566  | 7.503  | conserved Plasmodium protein, unknown function                               |
| PF3D7_0828800 | PVVCY_0700180 | 5.002  | 2.455  | 5.494  | 7.078  | GPI-anchored micronemal antigen, putative                                    |
| PF3D7_1136900 | PVVCY_0903550 | 5.092  | 2.714  | 5.756  | 7.178  | subtilisin-like protease 2, putative                                         |
| PF3D7_1231300 | PVVCY_1404810 | 3.117  | 2.477  | 2.424  | 3.108  | conserved Plasmodium protein, unknown function                               |
| PF3D7_1115900 | PVVCY_0901410 | 7.607  | 7.095  | 7.499  | 7.444  | palmitoyltransferase DHHC9, putative                                         |
| PF3D7_1135100 | PVVCY_0903370 | 12.595 | 11.951 | 11.397 | 11.883 | protein phosphatase PPM8, putative                                           |
| PF3D7_1367900 | PVVCY_1104480 | 4.835  | 4.331  | 4.217  | 4.941  | conserved Plasmodium protein, unknown function                               |
| PF3D7_1125800 | PVVCY_0902390 | 4.901  | 5.917  | 8.610  | 8.391  | kelch domain-containing protein, putative                                    |
| PF3D7_1366100 | PVVCY_1104300 | 3.400  | 1.683  | 5.097  | 6.275  | DIP13 homolog, putative                                                      |
| PF3D7_0104200 | PVVCY_0200870 | 7.931  | 6.730  | 8.074  | 9.538  | StAR-related lipid transfer protein                                          |
| PF3D7_1472300 | PVVCY_1303800 | 7.709  | 7.361  | 7.313  | 7.310  | conserved Plasmodium protein, unknown function                               |
| PF3D7_1218300 | PVVCY_1403610 | 5.799  | 5.435  | 5.239  | 6.045  | AP-2 complex subunit mu, putative                                            |
| PF3D7_0614700 | PVVCY_1203040 | 3.131  | 1.812  | 4.155  | 5.808  | conserved Plasmodium protein, unknown function                               |
| PF3D7_1136900 | PVVCY_0903550 | 5.092  | 2.714  | 5.756  | 7.178  | subtilisin-like protease 2, putative                                         |
| PF3D7_0216600 | PVVCY_0301420 | 6.080  | 6.173  | 7.150  | 6.957  | MtN3-like protein                                                            |
| PF3D7_0408000 | PVVCY_0800590 | 7.574  | 6.730  | 6.816  | 8.264  | conserved Plasmodium protein, unknown function                               |
| PF3D7_1205500 | PVVCY_0600460 | 7.801  | 7.077  | 8.111  | 8.599  | zinc finger protein, putative                                                |
| PF3D7_0808200 | PVVCY_1202340 | 5.278  | 3.277  | 5.506  | 7.145  | pepsinogen, putative                                                         |
| PF3D7_1209400 | PVVCY_0600810 | 6.113  | 5.985  | 6.651  | 7.411  | cytosolic iron-sulfur protein assembly protein 1, putative                   |
| PF3D7_1342600 | PVVCY_1305880 | 8.053  | 5.796  | 8.333  | 9.821  | myosin A, putative                                                           |
| PF3D7_0926300 | PVVCY_0802460 | 1.662  | 0.812  | 1.132  | 1.857  | protein kinase, putative                                                     |
| PF3D7_1123100 | PVVCY_0902110 | 7.399  | 7.297  | 6.696  | 6.528  | calcium-dependent protein kinase 7, putative                                 |
| PF3D7_1472300 | PVVCY_1303800 | 7.709  | 7.361  | 7.313  | 7.310  | conserved Plasmodium protein, unknown function                               |
| PF3D7_0805300 | PVVCY_1202620 | 3.532  | 2.809  | 2.504  | 3.146  | conserved Plasmodium protein, unknown function                               |
| PF3D7_0530100 | PVVCY_1204550 | 8.797  | 8.595  | 7.914  | 8.592  | SNARE protein, putative                                                      |
| PF3D7_0516700 | PVVCY_1203240 | 8.251  | 8.045  | 7.817  | 6.855  | ubiquitin carboxyl-terminal hydrolase 2, putative                            |
| PF3D7_1474400 | PVVCY_1300340 | 1.268  | 0.866  | 0.945  | 1.248  | conserved Plasmodium protein, unknown function                               |
| PF3D7_1127900 | PVVCY_0902600 | 4.903  | 4.068  | 5.927  | 7.077  | conserved Plasmodium protein, unknown function                               |
| PF3D7_1017500 | PVVCY_0500220 | 8.408  | 5.793  | 8.766  | 10.275 | conserved Plasmodium protein, unknown function                               |
| PF3D7_0629300 | PVVCY_1102920 | 0.726  | 0.518  | 0.409  | 0.344  | phosphatidylcholine-sterol acyltransferase, putative phospholipase, putative |
| PF3D7_0530100 | PVVCY_1204550 | 8.797  | 8.595  | 7.914  | 8.592  | SNARE protein, putative                                                      |
| PF3D7_1025000 | PVVCY_0500970 | 8.154  | 7.534  | 7.226  | 7.811  | formin 2, putative                                                           |
| PF3D7_1123100 | PVVCY_0902110 | 7.399  | 7.297  | 6.696  | 6.528  | calcium-dependent protein kinase 7, putative                                 |
| PF3D7_1025000 | PVVCY_0500970 | 8.154  | 7.534  | 7.226  | 7.811  | formin 2, putative                                                           |
| PF3D7_0703800 | PVVCY_1000280 | 3.148  | 2.564  | 2.506  | 3.176  | conserved Plasmodium protein, unknown function                               |

|               |               |        |        |        |        |                                                                   |
|---------------|---------------|--------|--------|--------|--------|-------------------------------------------------------------------|
| PF3D7_1127900 | PVVCY_0902600 | 4.903  | 4.068  | 5.927  | 7.077  | conserved Plasmodium protein, unknown function                    |
| PF3D7_0214100 | PVVCY_0301190 | 8.204  | 7.714  | 8.371  | 7.811  | protein transport protein SEC31, putative                         |
| PF3D7_0214100 | PVVCY_0301190 | 8.204  | 7.714  | 8.371  | 7.811  | protein transport protein SEC31, putative                         |
| PF3D7_0214100 | PVVCY_0301190 | 8.204  | 7.714  | 8.371  | 7.811  | protein transport protein SEC31, putative                         |
| PF3D7_0529900 | PVVCY_1204530 | 8.553  | 8.297  | 8.232  | 8.128  | zinc finger protein, putative                                     |
| PF3D7_0516700 | PVVCY_1203240 | 8.251  | 8.045  | 7.817  | 6.855  | ubiquitin carboxyl-terminal hydrolase 2, putative                 |
| PF3D7_1405700 | PVVCY_1004190 | 7.010  | 6.593  | 5.970  | 6.191  | RING zinc finger protein, putative                                |
| PF3D7_1238900 | PVVCY_1405560 | 6.652  | 4.462  | 7.137  | 8.778  | protein kinase 2, putative                                        |
| PF3D7_1414200 | PVVCY_1003390 | 7.864  | 7.910  | 7.146  | 8.282  | conserved Plasmodium protein, unknown function                    |
| PF3D7_1122300 | PVVCY_0902030 | 6.379  | 6.321  | 5.084  | 5.281  | conserved Plasmodium protein, unknown function                    |
| PF3D7_1428200 | PVVCY_1002130 | 5.331  | 5.063  | 6.029  | 6.502  | major facilitator superfamily domain-containing protein, putative |
| PF3D7_1025000 | PVVCY_0500970 | 8.154  | 7.534  | 7.226  | 7.811  | formin 2, putative                                                |
| PF3D7_1238900 | PVVCY_1405560 | 6.652  | 4.462  | 7.137  | 8.778  | protein kinase 2, putative                                        |
| PF3D7_1404700 | PVVCY_1004280 | 4.013  | 1.434  | 4.424  | 6.005  | conserved Plasmodium protein, unknown function                    |
| PF3D7_1238900 | PVVCY_1405560 | 6.652  | 4.462  | 7.137  | 8.778  | protein kinase 2, putative                                        |
| PF3D7_0410000 | PVVCY_0800790 | 7.267  | 5.750  | 5.831  | 7.574  | erythrocyte vesicle protein 1, putative                           |
| PF3D7_0803500 | PVVCY_1202770 | 5.916  | 5.039  | 5.217  | 6.333  | AAA family ATPase, putative                                       |
| PF3D7_0523800 | PVVCY_1203930 | 8.283  | 7.595  | 7.349  | 7.758  | transporter, putative                                             |
| PF3D7_1354800 | PVVCY_1103250 | 5.273  | 4.421  | 4.189  | 4.713  | metacaspase 1, putative                                           |
| PF3D7_0806500 | PVVCY_1202510 | 8.362  | 7.244  | 7.698  | 8.961  | DnaJ protein, putative                                            |
| PF3D7_1302200 | PVVCY_1400250 | 5.456  | 4.248  | 5.347  | 6.904  | early transcribed membrane protein                                |
| PF3D7_1250200 | PVVCY_1406520 | 7.978  | 7.155  | 7.476  | 8.054  | conserved Plasmodium protein, unknown function                    |
| PF3D7_0727900 | PVVCY_0201170 | 4.745  | 3.784  | 4.891  | 6.136  | conserved Plasmodium protein, unknown function                    |
| PF3D7_0703100 | PVVCY_1000210 | 6.116  | 6.389  | 6.639  | 6.183  | conserved Plasmodium protein, unknown function                    |
| PF3D7_1347700 | PVVCY_1306360 | 9.332  | 8.811  | 8.705  | 8.891  | ethanolamine-phosphate cytidyltransferase, putative               |
| PF3D7_1342500 | PVVCY_1305870 | 2.123  | 1.058  | 2.063  | 3.283  | sporozoite protein essential for cell traversal, putative         |
| PF3D7_0529900 | PVVCY_1204530 | 8.553  | 8.297  | 8.232  | 8.128  | zinc finger protein, putative                                     |
| PF3D7_1449300 | PVVCY_1301460 | 7.389  | 6.502  | 6.146  | 6.928  | transcription factor IIIb subunit, putative                       |
| PF3D7_0806600 | PVVCY_1202500 | 5.109  | 5.403  | 5.376  | 4.205  | kinesin-like protein, putative                                    |
| PF3D7_1240000 | PVVCY_1405660 | 6.048  | 6.173  | 5.657  | 4.813  | 3-hydroxyisobutyryl-coenzyme A hydrolase, putative                |
| PF3D7_1223400 | PVVCY_1404040 | 10.077 | 9.672  | 8.852  | 9.420  | phospholipid-transporting ATPase, putative                        |
| PF3D7_0420300 | PVVCY_0502240 | 7.457  | 6.039  | 6.685  | 8.088  | transcription factor with AP2 domain(s), putative                 |
| PF3D7_1433500 | PVVCY_1001620 | 8.252  | 7.714  | 8.549  | 8.940  | DNA topoisomerase 2, putative                                     |
| PF3D7_1203900 | PVVCY_0600300 | 11.465 | 11.257 | 11.419 | 10.800 | ubiquitin-conjugating enzyme E2, putative                         |
| PF3D7_1010100 | PVVCY_1200930 | 4.923  | 5.002  | 4.544  | 4.899  | conserved Plasmodium protein, unknown function                    |
| PF3D7_0806800 | PVVCY_1202470 | 9.076  | 8.944  | 8.709  | 8.765  | vacuolar proton translocating ATPase subunit A, putative          |
| PF3D7_1444500 | PVVCY_1301010 | 3.607  | 4.274  | 4.631  | 3.624  | GCN2 alpha-related protein kinase, putative                       |

|               |               |        |        |       |        |                                                       |
|---------------|---------------|--------|--------|-------|--------|-------------------------------------------------------|
| PF3D7_0410000 | PVVCY_0800790 | 7.267  | 5.750  | 5.831 | 7.574  | erythrocyte vesicle protein 1, putative               |
| PF3D7_0727900 | PVVCY_0201170 | 4.745  | 3.784  | 4.891 | 6.136  | conserved Plasmodium protein, unknown function        |
| PF3D7_0420300 | PVVCY_0502240 | 7.457  | 6.039  | 6.685 | 8.088  | transcription factor with AP2 domain(s), putative     |
| PF3D7_1320000 | PVVCY_1401980 | 8.372  | 7.929  | 8.028 | 8.089  | rhoptry protein 2, putative golgi protein 1, putative |
| PF3D7_0909700 | PVVCY_1001270 | 7.566  | 6.948  | 6.821 | 7.426  | FHA domain protein, putative                          |
| PF3D7_0922600 | PVVCY_0802100 | 10.389 | 9.991  | 8.513 | 8.851  | glutamine synthetase, putative                        |
| PF3D7_0818500 | PVVCY_0701210 | 8.985  | 8.668  | 8.841 | 9.407  | zinc finger protein, putative                         |
| PF3D7_1010100 | PVVCY_1200930 | 4.923  | 5.002  | 4.544 | 4.899  | conserved Plasmodium protein, unknown function        |
| PF3D7_0219900 | PVVCY_0301700 | 10.764 | 10.436 | 9.824 | 10.374 | Plasmodium exported protein, unknown function         |
| PF3D7_1113100 | PVVCY_0901170 | 9.532  | 9.287  | 8.914 | 9.577  | protein tyrosine phosphatase, putative                |
| PF3D7_0420300 | PVVCY_0502240 | 7.457  | 6.039  | 6.685 | 8.088  | transcription factor with AP2 domain(s), putative     |
| PF3D7_1321900 | PVVCY_1303980 | 9.835  | 9.561  | 9.436 | 9.573  | conserved Plasmodium protein, unknown function        |
| PF3D7_0821100 | PVVCY_0700950 | 4.633  | 4.962  | 6.350 | 6.512  | protein kinase 1, putative                            |
| PF3D7_0315200 | PVVCY_0401410 | 1.642  | 0.997  | 1.131 | 1.385  | circumsporozoite- and TRAP-related protein, putative  |
| PF3D7_0301800 | PVVCY_0700040 | 9.430  | 8.653  | 8.976 | 9.767  | Plasmodium exported protein, unknown function         |
| PF3D7_0916700 | PVVCY_0801510 | 7.038  | 6.590  | 6.744 | 7.779  | RNA-binding protein musashi, putative                 |
| PF3D7_1016100 | PVVCY_1201530 | 0.973  | 0.696  | 0.630 | 1.304  | conserved Plasmodium protein, unknown function        |
| PF3D7_0711100 | PVVCY_1202260 | 7.935  | 7.240  | 7.237 | 8.022  | conserved Plasmodium protein, unknown function        |
| PF3D7_0323500 | PVVCY_1201580 | 6.508  | 6.532  | 6.528 | 6.995  | survival motor neuron-like protein, putative          |
| PF3D7_0929600 | PVVCY_0802800 | 6.767  | 6.112  | 6.111 | 6.608  | G2 protein, putative                                  |
| PF3D7_0420300 | PVVCY_0502240 | 7.457  | 6.039  | 6.685 | 8.088  | transcription factor with AP2 domain(s), putative     |
| PF3D7_0420300 | PVVCY_0502240 | 7.457  | 6.039  | 6.685 | 8.088  | transcription factor with AP2 domain(s), putative     |
| PF3D7_0517200 | PVVCY_1203290 | 1.763  | 1.565  | 0.856 | 1.057  | conserved Plasmodium protein, unknown function        |
| PF3D7_0204200 | PVVCY_0300290 | 7.668  | 7.748  | 8.304 | 8.533  | conserved Plasmodium protein, unknown function        |
| PF3D7_0806600 | PVVCY_1202500 | 5.109  | 5.403  | 5.376 | 4.205  | kinesin-like protein, putative                        |
| PF3D7_0916700 | PVVCY_0801510 | 7.038  | 6.590  | 6.744 | 7.779  | RNA-binding protein musashi, putative                 |
| PF3D7_0609700 | PVVCY_0100960 | 6.814  | 6.099  | 5.831 | 7.310  | conserved Plasmodium protein, unknown function        |
| PF3D7_1356600 | PVVCY_1103410 | 6.515  | 6.397  | 6.865 | 6.918  | regulator of chromosome condensation, putative        |
| PF3D7_1251500 | PVVCY_1406650 | 6.331  | 5.745  | 5.083 | 6.107  | ATP-dependent RNA helicase DRS1, putative             |
| PF3D7_0922600 | PVVCY_0802100 | 10.389 | 9.991  | 8.513 | 8.851  | glutamine synthetase, putative                        |
| PF3D7_0420300 | PVVCY_0502240 | 7.457  | 6.039  | 6.685 | 8.088  | transcription factor with AP2 domain(s), putative     |
| PF3D7_0820500 | PVVCY_0701010 | 6.162  | 5.748  | 5.747 | 6.385  | conserved Plasmodium protein, unknown function        |
| PF3D7_0420300 | PVVCY_0502240 | 7.457  | 6.039  | 6.685 | 8.088  | transcription factor with AP2 domain(s), putative     |
| PF3D7_0304200 | PVVCY_0400340 | 8.516  | 7.874  | 7.483 | 8.343  | EH domain-containing protein, putative                |
| PF3D7_1319100 | PVVCY_1401910 | 7.576  | 6.949  | 6.864 | 7.350  | conserved protein, unknown function                   |
| PF3D7_1411200 | PVVCY_1003670 | 7.404  | 6.679  | 6.915 | 7.645  | rhomboid protease ROM8, putative                      |

|               |               |        |        |        |        |                                                             |
|---------------|---------------|--------|--------|--------|--------|-------------------------------------------------------------|
| PF3D7_0525100 | PVVCY_1204060 | 10.651 | 10.268 | 10.081 | 10.038 | acyl-CoA synthetase, putative                               |
| PF3D7_1203200 | PVVCY_0600240 | 7.148  | 7.583  | 7.459  | 7.185  | signal recognition particle subunit SRP14, putative         |
| PF3D7_1021700 | PVVCY_0500640 | 6.493  | 6.223  | 5.534  | 6.890  | conserved Plasmodium protein, unknown function              |
| PF3D7_1103500 | PVVCY_0900290 | 5.332  | 4.586  | 4.500  | 4.963  | CPW-WPC family protein                                      |
| PF3D7_1333400 | PVVCY_1305080 | 6.891  | 6.590  | 5.790  | 5.482  | conserved Plasmodium protein, unknown function              |
| PF3D7_1138100 | PVVCY_0903670 | 7.031  | 6.971  | 5.888  | 6.209  | ubiquitin-related modifier 1, putative                      |
| PF3D7_1450100 | PVVCY_1301540 | 7.692  | 7.306  | 7.386  | 7.410  | signal recognition particle subunit SRP54, putative         |
| PF3D7_0420300 | PVVCY_0502240 | 7.457  | 6.039  | 6.685  | 8.088  | transcription factor with AP2 domain(s), putative           |
| PF3D7_1216600 | PVVCY_1403430 | 3.512  | 3.150  | 3.169  | 3.372  | cell traversal protein for ookinetes and sporozoites        |
| PF3D7_1466400 | PVVCY_1303230 | 6.479  | 5.359  | 6.075  | 7.123  | transcription factor with AP2 domain(s), putative           |
| PF3D7_0311500 | PVVCY_0401030 | 12.797 | 12.148 | 10.829 | 11.632 | conserved Plasmodium protein, unknown function              |
| PF3D7_0818300 | PVVCY_0701230 | 0.401  | 0.056  | 0.293  | 0.393  | dynactin subunit 6, putative                                |
| PF3D7_1218500 | PVVCY_1403630 | 7.850  | 7.236  | 7.132  | 7.453  | conserved Plasmodium protein, unknown function              |
| PF3D7_1450000 | PVVCY_1301530 | 8.531  | 8.079  | 8.303  | 8.889  | serine threonine protein kinase, putative                   |
| PF3D7_1454500 | PVVCY_1301970 | 7.802  | 7.543  | 7.113  | 7.294  | iron sulfur cluster assembly protein, putative              |
| PF3D7_0502400 | PVVCY_1100310 | 12.518 | 11.800 | 10.425 | 11.245 | merozoite surface protein 8, putative                       |
| PF3D7_1310300 | PVVCY_1401050 | 7.081  | 7.520  | 6.129  | 6.115  | zinc finger protein, putative                               |
| PF3D7_0830500 | PVVCY_0502480 | 6.344  | 8.516  | 10.569 | 9.671  | tryptophan-rich antigen tryptophan-rich protein             |
| PF3D7_1474400 | PVVCY_1300340 | 1.268  | 0.866  | 0.945  | 1.248  | conserved Plasmodium protein, unknown function              |
| PF3D7_0502400 | PVVCY_1100310 | 12.518 | 11.800 | 10.425 | 11.245 | merozoite surface protein 8, putative                       |
| PF3D7_1464000 | PVVCY_1302980 | 7.344  | 7.606  | 7.313  | 6.983  | YL1 nuclear protein, putative                               |
| PF3D7_0502400 | PVVCY_1100310 | 12.518 | 11.800 | 10.425 | 11.245 | merozoite surface protein 8, putative                       |
| PF3D7_0519700 | PVVCY_1203540 | 9.671  | 9.708  | 9.502  | 9.797  | conserved Plasmodium protein, unknown function              |
| PF3D7_1021700 | PVVCY_0500640 | 6.493  | 6.223  | 5.534  | 6.890  | conserved Plasmodium protein, unknown function              |
| PF3D7_1123500 | PVVCY_0902150 | 7.713  | 7.471  | 7.772  | 7.310  | conserved Plasmodium protein, unknown function              |
| PF3D7_0305300 | PVVCY_0400440 | 10.298 | 9.773  | 8.712  | 9.168  | conserved Plasmodium membrane protein, unknown function     |
| PF3D7_1343700 | PVVCY_1305980 | 8.380  | 7.502  | 7.659  | 8.599  | kelch protein K13, putative                                 |
| PF3D7_0914200 | PVVCY_0801260 | 8.559  | 8.144  | 8.427  | 8.565  | phospholipid or glycerol acyltransferase, putative          |
| PF3D7_0630100 | PVVCY_1103000 | 3.754  | 2.965  | 4.033  | 4.971  | conserved Plasmodium protein, unknown function              |
| PF3D7_1336000 | PVVCY_1305260 | 6.889  | 6.848  | 6.965  | 7.043  | conserved Plasmodium protein, unknown function              |
| PF3D7_1116800 | PVVCY_0901510 | 8.565  | 8.095  | 8.695  | 9.509  | heat shock protein 101, putative                            |
| PF3D7_1122200 | PVVCY_0902020 | 6.218  | 5.598  | 4.999  | 5.421  | cupin-like protein, putative                                |
| PF3D7_1460100 | PVVCY_1302520 | 8.270  | 7.811  | 7.172  | 7.454  | FYVE and coiled-coil domain-containing protein, putative    |
| PF3D7_1245800 | PVVCY_1406100 | 7.748  | 7.221  | 7.343  | 8.515  | epsin, putative                                             |
| PF3D7_0914700 | PVVCY_0801310 | 9.788  | 8.567  | 6.889  | 8.549  | major facilitator superfamily-related transporter, putative |

|               |               |        |        |        |        |                                                                            |
|---------------|---------------|--------|--------|--------|--------|----------------------------------------------------------------------------|
| PF3D7_0506200 | PVVCY_1100670 | 7.214  | 6.958  | 5.821  | 7.117  | TATA-box binding protein, putative                                         |
| PF3D7_1336000 | PVVCY_1305260 | 6.889  | 6.848  | 6.965  | 7.043  | conserved Plasmodium protein, unknown function                             |
| PF3D7_0625400 | PVVCY_1102550 | 6.606  | 6.467  | 7.460  | 8.288  | conserved Plasmodium protein, unknown function                             |
| PF3D7_0724500 | PVVCY_0602230 | 2.762  | 1.736  | 2.083  | 2.936  | conserved Plasmodium protein, unknown function                             |
| PF3D7_0214800 | PVVCY_0301250 | 8.596  | 8.008  | 7.368  | 8.024  | conserved Plasmodium protein, unknown function                             |
| PF3D7_1122800 | PVVCY_0902080 | 4.728  | 5.142  | 5.954  | 5.024  | calcium-dependent protein kinase 6, putative                               |
| PF3D7_1475600 | PVVCY_1300230 | 5.798  | 5.763  | 6.234  | 6.263  | bromodomain protein, putative                                              |
| PF3D7_1122200 | PVVCY_0902020 | 6.218  | 5.598  | 4.999  | 5.421  | cupin-like protein, putative                                               |
| PF3D7_1118300 | PVVCY_0901650 | 7.099  | 7.087  | 6.822  | 5.810  | insulinase, putative                                                       |
| PF3D7_1324400 | PVVCY_1304220 | 6.972  | 7.118  | 7.349  | 7.013  | MSF1-like protein, putative                                                |
| PF3D7_0814500 | PVVCY_1402480 | 4.704  | 2.186  | 4.785  | 6.774  | conserved Plasmodium protein, unknown function                             |
| PF3D7_1458000 | PVVCY_1302320 | 11.756 | 11.139 | 10.022 | 10.451 | chabaupain 1                                                               |
| PF3D7_0204700 | PVVCY_0300340 | 10.195 | 10.271 | 10.358 | 9.614  | hexose transporter, putative                                               |
| PF3D7_1445500 | PVVCY_1301100 | 4.675  | 5.051  | 2.587  | 4.811  | conserved Plasmodium protein, unknown function                             |
| PF3D7_1404900 | PVVCY_1004270 | 9.051  | 9.078  | 9.270  | 9.249  | conserved Plasmodium protein, unknown function                             |
| PF3D7_1133700 | PVVCY_0903240 | 6.067  | 5.872  | 5.955  | 5.464  | FHA domain-containing protein, putative                                    |
| PF3D7_0814500 | PVVCY_1402480 | 4.704  | 2.186  | 4.785  | 6.774  | conserved Plasmodium protein, unknown function                             |
| PF3D7_1455100 | PVVCY_1302030 | 5.988  | 7.140  | 6.334  | 5.546  | protein tyrosine phosphatase, putative                                     |
| PF3D7_1472200 | PVVCY_1303790 | 6.645  | 5.897  | 5.594  | 6.322  | histone deacetylase, putative                                              |
| PF3D7_0418700 | PVVCY_0702050 | 7.524  | 7.253  | 6.710  | 7.416  | RNA-binding protein NOB1, putative                                         |
| PF3D7_0202700 | PVVCY_0300160 | 5.116  | 5.987  | 6.237  | 5.660  | octaprenyl pyrophosphate synthase, putative                                |
| PF3D7_1465400 | PVVCY_1303120 | 7.860  | 8.223  | 8.051  | 7.689  | conserved Plasmodium protein, unknown function                             |
| PF3D7_1313800 | PVVCY_1401230 | 3.072  | 3.516  | 3.714  | 3.156  | conserved Plasmodium protein, unknown function                             |
| PF3D7_1133700 | PVVCY_0903240 | 6.067  | 5.872  | 5.955  | 5.464  | FHA domain-containing protein, putative                                    |
| PF3D7_1221900 | PVVCY_1403910 | 7.509  | 7.554  | 7.221  | 6.712  | conserved Plasmodium protein, unknown function                             |
| PF3D7_1327600 | PVVCY_1304540 | 7.318  | 7.568  | 6.689  | 6.728  | nicotinate-nucleotide adenyltransferase, putative                          |
| PF3D7_1245800 | PVVCY_1406100 | 7.748  | 7.221  | 7.343  | 8.515  | epsin, putative                                                            |
| PF3D7_1420300 | PVVCY_1002780 | 6.114  | 5.931  | 6.208  | 6.360  | Hsp70-escort protein 1, putative<br>DNL-type zinc finger protein, putative |
| PF3D7_1352200 | PVVCY_1306790 | 7.133  | 6.680  | 5.843  | 6.542  | U3 small nucleolar RNA-associated protein 15, putative                     |
| PF3D7_0723100 | PVVCY_0602090 | 1.703  | 1.258  | 1.447  | 1.995  | conserved Plasmodium protein, unknown function                             |
| PF3D7_0609700 | PVVCY_0100960 | 6.814  | 6.099  | 5.831  | 7.310  | conserved Plasmodium protein, unknown function                             |
| PF3D7_0107500 | PVVCY_0200570 | 8.516  | 8.215  | 7.791  | 8.464  | lipid_sterol:H+ symporter, putative                                        |
| PF3D7_0309300 | PVVCY_0400820 | 6.323  | 5.650  | 5.337  | 5.871  | N2227-like protein, putative                                               |
| PF3D7_1223800 | PVVCY_1404080 | 6.557  | 6.665  | 5.950  | 5.192  | mitochondrial carrier protein, putative                                    |
| PF3D7_0419800 | PVVCY_0702160 | 7.043  | 6.782  | 6.351  | 7.061  | 60S ribosomal protein L7ae/L30e, putative                                  |
| PF3D7_1022100 | PVVCY_0500680 | 6.262  | 6.106  | 5.196  | 6.053  | conserved Plasmodium protein, unknown function                             |

|               |               |        |        |        |        |                                                                                      |
|---------------|---------------|--------|--------|--------|--------|--------------------------------------------------------------------------------------|
| PF3D7_0708200 | PVVCY_1000720 | 3.966  | 3.824  | 4.073  | 3.220  | conserved Plasmodium protein, unknown function                                       |
| PF3D7_1118600 | PVVCY_0901680 | 6.599  | 6.594  | 6.906  | 6.650  | histone acetyltransferase, putative                                                  |
| PF3D7_1457600 | PVVCY_1302280 | 6.379  | 6.086  | 5.663  | 6.276  | conserved Plasmodium protein, unknown function                                       |
| PF3D7_1459000 | PVVCY_1302420 | 8.461  | 8.256  | 7.433  | 7.275  | ATP-dependent RNA helicase DBP5, putative                                            |
| PF3D7_0724400 | PVVCY_0602220 | 7.421  | 7.310  | 6.634  | 6.991  | mitochondrial import inner membrane translocase subunit TIM14, putative              |
| PF3D7_1345100 | PVVCY_1306110 | 8.153  | 7.831  | 8.297  | 9.222  | thioredoxin 2, putative                                                              |
| PF3D7_1105600 | PVVCY_0900500 | 6.768  | 6.560  | 6.824  | 7.703  | translocon component PTEX88, putative                                                |
| PF3D7_0720300 | PVVCY_0601810 | 1.253  | 1.168  | 2.389  | 2.968  | conserved Plasmodium protein, unknown function                                       |
| PF3D7_1143800 | PVVCY_0904210 | 3.613  | 2.586  | 5.034  | 6.006  | conserved Plasmodium protein, unknown function                                       |
| PF3D7_0912100 | PVVCY_1001500 | 6.345  | 6.121  | 5.458  | 5.311  | zinc finger protein, putative                                                        |
| PF3D7_1427100 | PVVCY_1002240 | 0.981  | 0.839  | 0.758  | 0.693  | lipase, putative                                                                     |
| PF3D7_1464200 | PVVCY_1303000 | 5.790  | 5.454  | 4.515  | 5.507  | zinc finger protein, putative                                                        |
| PF3D7_1237200 | PVVCY_1405400 | 5.655  | 4.977  | 4.172  | 5.130  | conserved Plasmodium protein, unknown function                                       |
| PF3D7_1464600 | PVVCY_1303040 | 5.775  | 4.567  | 5.959  | 7.184  | serine_threonine protein phosphatase UIS2, putative                                  |
| PF3D7_1456800 | PVVCY_1302200 | 10.744 | 10.344 | 10.403 | 10.275 | V-type H(+)-translocating pyrophosphatase, putative                                  |
| PF3D7_1207100 | PVVCY_0600610 | 7.357  | 6.855  | 6.904  | 7.234  | small subunit rRNA processing factor, putative                                       |
| PF3D7_1321800 | PVVCY_1303970 | 10.031 | 9.238  | 9.252  | 9.618  | protein transport protein SFT2, putative                                             |
| PF3D7_1210400 | PVVCY_0600920 | 4.745  | 5.222  | 5.178  | 4.109  | general transcription factor 3C polypeptide 5, putative                              |
| PF3D7_1306600 | PVVCY_1400680 | 8.011  | 8.004  | 7.429  | 7.286  | V-type proton ATPase subunit H, putative                                             |
| PF3D7_0606500 | PVVCY_0100650 | 7.259  | 6.921  | 6.940  | 6.459  | polypyrimidine tract-binding protein, putative                                       |
| PF3D7_1445600 | PVVCY_1301110 | 7.122  | 6.952  | 7.405  | 7.360  | RNA-binding protein, putative                                                        |
| PF3D7_1413800 | PVVCY_1003430 | 6.120  | 5.660  | 5.281  | 5.883  | diphthamide biosynthesis protein 1, putative                                         |
| PF3D7_1024800 | PVVCY_0500950 | 11.561 | 10.843 | 10.276 | 10.249 | conserved Plasmodium protein, unknown function                                       |
| PF3D7_1365300 | PVVCY_1104220 | 5.252  | 4.395  | 3.850  | 4.878  | conserved Plasmodium protein, unknown function                                       |
| PF3D7_1332500 | PVVCY_1305000 | 7.734  | 7.970  | 7.270  | 7.118  | SAM-dependent RNA methyltransferase, putative                                        |
| PF3D7_0606500 | PVVCY_0100650 | 7.259  | 6.921  | 6.940  | 6.459  | polypyrimidine tract-binding protein, putative                                       |
| PF3D7_1456800 | PVVCY_1302200 | 10.744 | 10.344 | 10.403 | 10.275 | V-type H(+)-translocating pyrophosphatase, putative                                  |
| PF3D7_0320500 | PVVCY_1201890 | 8.059  | 7.862  | 6.721  | 6.656  | nicotinamidase, putative                                                             |
| PF3D7_0625600 | PVVCY_1102570 | 5.617  | 5.724  | 5.878  | 5.465  | poly(A) polymerase PAP, putative                                                     |
| PF3D7_0319700 | PVVCY_1201960 | 6.664  | 5.544  | 5.524  | 6.514  | ABC transporter I family member 1, putative                                          |
| PF3D7_0110800 | PVVCY_0200270 | 8.295  | 7.949  | 7.811  | 8.122  | transcription initiation factor TFIIB, putative                                      |
| PF3D7_0523000 | PVVCY_1203850 | 10.479 | 10.101 | 9.886  | 9.696  | ABC transporter B family member 1, putative multidrug resistance protein 1, putative |
| PF3D7_0730300 | PVVCY_0201410 | 6.550  | 6.988  | 8.120  | 8.387  | transcription factor with AP2 domain(s), putative                                    |
| PF3D7_1241100 | PVVCY_1405670 | 6.270  | 6.309  | 6.081  | 5.302  | polyadenylation factor subunit 2, putative                                           |
| PF3D7_0319700 | PVVCY_1201960 | 6.664  | 5.544  | 5.524  | 6.514  | ABC transporter I family member 1, putative                                          |
| PF3D7_0517300 | PVVCY_1203300 | 9.942  | 9.743  | 9.782  | 9.400  | serine_arginine-rich splicing factor 1, putative                                     |

|               |               |        |        |        |        |                                                                                      |
|---------------|---------------|--------|--------|--------|--------|--------------------------------------------------------------------------------------|
| PF3D7_0407000 | PVVCY_0800490 | 5.019  | 5.082  | 4.101  | 4.696  | conserved Plasmodium protein, unknown function                                       |
| PF3D7_0730300 | PVVCY_0201410 | 6.550  | 6.988  | 8.120  | 8.387  | transcription factor with AP2 domain(s), putative                                    |
| PF3D7_0730300 | PVVCY_0201410 | 6.550  | 6.988  | 8.120  | 8.387  | transcription factor with AP2 domain(s), putative                                    |
| PF3D7_1321300 | PVVCY_1402110 | 4.121  | 3.576  | 3.380  | 3.760  | conserved Plasmodium protein, unknown function                                       |
| PF3D7_1213900 | PVVCY_1403170 | 8.019  | 7.719  | 7.385  | 6.746  | conserved Plasmodium protein, unknown function                                       |
| PF3D7_1217500 | PVVCY_1403530 | 10.755 | 10.807 | 10.595 | 10.453 | conserved Plasmodium protein, unknown function                                       |
| PF3D7_0716200 | PVVCY_0601420 | 7.150  | 6.211  | 5.785  | 6.837  | conserved Plasmodium protein, unknown function                                       |
| PF3D7_0203700 | PVVCY_0300240 | 7.347  | 6.753  | 6.259  | 7.072  | protein MAK16, putative                                                              |
| PF3D7_0523000 | PVVCY_1203850 | 10.479 | 10.101 | 9.886  | 9.696  | ABC transporter B family member 1, putative multidrug resistance protein 1, putative |
| PF3D7_1434600 | PVVCY_0801070 | 7.724  | 7.427  | 6.873  | 6.722  | methionine aminopeptidase 2, putative                                                |
| PF3D7_0523000 | PVVCY_1203850 | 10.479 | 10.101 | 9.886  | 9.696  | ABC transporter B family member 1, putative multidrug resistance protein 1, putative |
| PF3D7_0523000 | PVVCY_1203850 | 10.479 | 10.101 | 9.886  | 9.696  | ABC transporter B family member 1, putative multidrug resistance protein 1, putative |
| PF3D7_0530500 | PVVCY_1204590 | 0.243  | 0.429  | 0.159  | 0.125  | conserved Plasmodium protein, unknown function                                       |
| PF3D7_0523000 | PVVCY_1203850 | 10.479 | 10.101 | 9.886  | 9.696  | ABC transporter B family member 1, putative multidrug resistance protein 1, putative |
| PF3D7_0523000 | PVVCY_1203850 | 10.479 | 10.101 | 9.886  | 9.696  | ABC transporter B family member 1, putative multidrug resistance protein 1, putative |
| PF3D7_0905200 | PVVCY_0401730 | 6.555  | 6.118  | 5.888  | 6.216  | mitochondrial carrier protein, putative                                              |
| PF3D7_0818800 | PVVCY_0701180 | 7.322  | 6.905  | 6.234  | 6.942  | U3 small nucleolar ribonucleoprotein protein IMP4, putative                          |
| PF3D7_1452100 | PVVCY_1301740 | 2.781  | 2.873  | 2.142  | 2.489  | leucine-rich repeat protein                                                          |
| PF3D7_1453900 | PVVCY_1301910 | 7.068  | 6.107  | 5.620  | 6.402  | conserved Plasmodium protein, unknown function                                       |
| PF3D7_0716200 | PVVCY_0601420 | 7.150  | 6.211  | 5.785  | 6.837  | conserved Plasmodium protein, unknown function                                       |
| PF3D7_1108000 | PVVCY_0900740 | 6.777  | 6.647  | 6.580  | 6.841  | IWS1-like protein, putative                                                          |
| PF3D7_0931100 | PVVCY_0802960 | 6.325  | 6.148  | 5.282  | 5.775  | nucleolar protein Nop52, putative                                                    |
| PF3D7_0804300 | PVVCY_1202730 | 5.011  | 4.563  | 3.922  | 5.150  | conserved Plasmodium protein, unknown function                                       |
| PF3D7_1224300 | PVVCY_1404130 | 11.840 | 11.712 | 10.727 | 10.757 | polyadenylate-binding protein, putative                                              |
| PF3D7_0709000 | PVVCY_1202040 | 10.946 | 10.572 | 9.141  | 9.565  | chloroquine resistance transporter, putative                                         |
| PF3D7_1144500 | PVVCY_0904280 | 5.815  | 6.674  | 6.743  | 5.955  | SUMO-activating enzyme subunit 1, putative                                           |
| PF3D7_1203500 | PVVCY_0600270 | 6.531  | 5.955  | 4.821  | 5.805  | threonylcarbamoyl-AMP synthase, putative                                             |
| PF3D7_1411900 | PVVCY_1003600 | 11.160 | 10.739 | 10.677 | 11.092 | p1_s1 nuclease, putative                                                             |
| PF3D7_1230900 | PVVCY_1404770 | 6.819  | 6.555  | 5.807  | 5.993  | serine_threonine protein kinase RIO1, putative                                       |
| PF3D7_1230500 | PVVCY_1404730 | 5.915  | 5.752  | 5.049  | 5.415  | WD repeat-containing protein, putative                                               |
| PF3D7_1423000 | PVVCY_1002540 | 7.541  | 7.397  | 6.737  | 7.091  | nucleolar GTP-binding protein 2, putative                                            |
| PF3D7_1350900 | PVVCY_1306670 | 1.432  | 0.857  | 1.248  | 1.553  | transcription factor with AP2 domain(s), putative                                    |
| PF3D7_1203500 | PVVCY_0600270 | 6.531  | 5.955  | 4.821  | 5.805  | threonylcarbamoyl-AMP synthase, putative                                             |
| PF3D7_1217200 | PVVCY_1403500 | 6.885  | 6.246  | 5.742  | 6.558  | multiple RNA-binding domain-containing protein 1, putative                           |



|               |               |        |        |        |        |                                                                |
|---------------|---------------|--------|--------|--------|--------|----------------------------------------------------------------|
| PF3D7_0814300 | PVVCY_1402500 | 6.581  | 6.126  | 5.442  | 6.466  | ATPase, putative                                               |
| PF3D7_0716200 | PVVCY_0601420 | 7.150  | 6.211  | 5.785  | 6.837  | conserved Plasmodium protein, unknown function                 |
| PF3D7_0419800 | PVVCY_0702160 | 7.043  | 6.782  | 6.351  | 7.061  | 60S ribosomal protein L7ae/L30e, putative                      |
| PF3D7_0318600 | PVVCY_1000830 | 6.042  | 5.782  | 5.149  | 4.206  | cleavage and polyadenylation specificity factor, putative      |
| PF3D7_1008800 | PVVCY_1200780 | 8.880  | 8.157  | 7.336  | 8.230  | nucleolar protein 5, putative                                  |
| PF3D7_0804300 | PVVCY_1202730 | 5.011  | 4.563  | 3.922  | 5.150  | conserved Plasmodium protein, unknown function                 |
| PF3D7_0704000 | PVVCY_1000300 | 4.526  | 4.305  | 3.870  | 3.486  | conserved Plasmodium protein, unknown function                 |
| PF3D7_0606100 | PVVCY_0100620 | 6.628  | 6.924  | 6.659  | 5.959  | RNA-binding protein, putative                                  |
| PF3D7_1022600 | PVVCY_0500730 | 6.385  | 6.484  | 5.804  | 5.355  | kelch domain-containing protein, putative                      |
| PF3D7_0108400 | PVVCY_0200490 | 7.200  | 6.788  | 6.020  | 6.948  | mitochondrial carrier protein, putative                        |
| PF3D7_1224300 | PVVCY_1404130 | 11.840 | 11.712 | 10.727 | 10.757 | polyadenylate-binding protein, putative                        |
| PF3D7_0804800 | PVVCY_1202670 | 7.096  | 7.444  | 7.474  | 7.382  | peptidyl-prolyl cis-trans isomerase, putative                  |
| PF3D7_0720100 | PVVCY_0601790 | 4.986  | 5.090  | 3.887  | 5.079  | small subunit rRNA processing protein, putative                |
| PF3D7_1422400 | PVVCY_1002600 | 5.868  | 5.216  | 4.782  | 5.203  | conserved Plasmodium protein, unknown function                 |
| PF3D7_0816000 | PVVCY_0701460 | 7.164  | 6.283  | 5.405  | 6.529  | ribosome assembly protein RRB1, putative                       |
| PF3D7_1248200 | PVVCY_1406320 | 7.466  | 7.253  | 7.360  | 7.456  | pre-mRNA-splicing factor RBM22, putative                       |
| PF3D7_1009000 | PVVCY_1200810 | 7.251  | 6.935  | 6.199  | 6.343  | diphthine methyl ester synthase, putative                      |
| PF3D7_0821300 | PVVCY_0700930 | 7.055  | 6.688  | 6.364  | 6.534  | ATP-dependent RNA helicase DHX36, putative                     |
| PF3D7_1217200 | PVVCY_1403500 | 6.885  | 6.246  | 5.742  | 6.558  | multiple RNA-binding domain-containing protein 1, putative     |
| PF3D7_1426800 | PVVCY_1002270 | 6.905  | 6.698  | 6.358  | 5.869  | conserved Plasmodium protein, unknown function                 |
| PF3D7_1129100 | PVVCY_0902780 | 12.108 | 11.510 | 11.097 | 11.938 | parasitophorous vacuolar protein 1, putative                   |
| PF3D7_1405800 | PVVCY_1004180 | 7.006  | 6.470  | 5.603  | 6.554  | ribosome biogenesis protein BOP1, putative                     |
| PF3D7_1420700 | PVVCY_1002740 | 6.282  | 5.802  | 5.827  | 6.983  | surface protein P113, putative                                 |
| PF3D7_0412200 | PVVCY_0601380 | 6.444  | 6.365  | 6.400  | 5.947  | conserved Plasmodium protein, unknown function                 |
| PF3D7_1457700 | PVVCY_1302290 | 7.153  | 6.743  | 5.886  | 6.446  | large ribosomal subunit nuclear export factor, putative        |
| PF3D7_1225400 | PVVCY_1404240 | 5.302  | 5.052  | 4.055  | 5.811  | conserved Plasmodium protein, unknown function                 |
| PF3D7_0722600 | PVVCY_0602040 | 7.745  | 7.049  | 6.611  | 7.337  | U3 small nucleolar RNA-associated protein 7, putative          |
| PF3D7_1022600 | PVVCY_0500730 | 6.385  | 6.484  | 5.804  | 5.355  | kelch domain-containing protein, putative                      |
| PF3D7_0407300 | PVVCY_0800520 | 6.242  | 6.313  | 5.419  | 5.817  | transcription factor, putative                                 |
| PF3D7_1109400 | PVVCY_0900850 | 8.532  | 8.204  | 7.326  | 7.650  | essential nuclear protein 1, putative                          |
| PF3D7_1118500 | PVVCY_0901670 | 8.602  | 8.246  | 7.125  | 7.769  | nucleolar protein 56, putative                                 |
| PF3D7_1367400 | PVVCY_1104430 | 5.795  | 5.294  | 4.380  | 5.359  | conserved Plasmodium protein, unknown function                 |
| PF3D7_1415200 | PVVCY_1003280 | 8.483  | 8.193  | 8.185  | 8.016  | DNA-directed RNA polymerases I and III subunit RPAC2, putative |
| PF3D7_1450300 | PVVCY_1301560 | 5.703  | 5.732  | 5.032  | 5.024  | NADPH--cytochrome P450 reductase, putative                     |
| PF3D7_1003500 | PVVCY_1200250 | 11.320 | 11.343 | 10.819 | 10.645 | 40S ribosomal protein S20e, putative                           |
| PF3D7_0522300 | PVVCY_1203780 | 7.753  | 7.127  | 6.601  | 7.199  | S-adenosylmethionine-dependent methyltransferase, putative     |

|               |               |        |        |        |        |                                                                |
|---------------|---------------|--------|--------|--------|--------|----------------------------------------------------------------|
| PF3D7_1349800 | PVVCY_1306560 | 6.289  | 5.976  | 4.986  | 5.292  | nucleolar preribosomal associated cytoplasmic ATPase, putative |
| PF3D7_0903400 | PVVCY_0401910 | 7.741  | 7.423  | 6.737  | 6.472  | DEAD_DEAH box helicase, putative                               |
| PF3D7_1445400 | PVVCY_1301090 | 6.245  | 5.837  | 5.641  | 6.045  | serine threonine kinase-1, putative                            |
| PF3D7_1420000 | PVVCY_1002810 | 7.747  | 7.486  | 7.760  | 7.370  | splicing factor 3B subunit 4, putative                         |
| PF3D7_0420100 | PVVCY_0502210 | 6.570  | 6.160  | 5.572  | 6.536  | serine threonine protein kinase RIO2, putative                 |
| PF3D7_0819000 | PVVCY_0701160 | 6.522  | 6.537  | 6.303  | 6.289  | conserved Plasmodium protein, unknown function                 |
| PF3D7_1332700 | PVVCY_1305020 | 6.587  | 6.121  | 5.167  | 5.702  | ATP-dependent RNA helicase DBP8, putative                      |
| PF3D7_0110400 | PVVCY_0200310 | 7.519  | 7.372  | 7.459  | 7.290  | DNA-directed RNA polymerase II subunit RPB9, putative          |
| PF3D7_1407100 | PVVCY_1004050 | 9.593  | 9.056  | 8.183  | 8.916  | rRNA 2'-O-methyltransferase fibrillar, putative                |
| PF3D7_0602100 | PVVCY_0100230 | 6.862  | 6.110  | 5.678  | 6.146  | ATP-dependent RNA helicase, putative                           |
| PF3D7_0409200 | PVVCY_0800710 | 7.167  | 6.576  | 6.223  | 6.890  | protein SOF1, putative                                         |
| PF3D7_1405800 | PVVCY_1004180 | 7.006  | 6.470  | 5.603  | 6.554  | ribosome biogenesis protein BOP1, putative                     |
| PF3D7_1201500 | PVVCY_0600070 | 7.170  | 6.819  | 6.369  | 6.485  | XPA binding protein 1, putative                                |
| PF3D7_0725300 | PVVCY_0602320 | 6.091  | 5.475  | 4.826  | 5.316  | conserved Plasmodium protein, unknown function                 |
| PF3D7_1414100 | PVVCY_1003400 | 5.457  | 5.536  | 5.631  | 5.661  | conserved Plasmodium protein, unknown function                 |
| PF3D7_0509400 | PVVCY_1100990 | 6.665  | 6.254  | 5.928  | 5.714  | RNA polymerase I, putative                                     |
| PF3D7_0725300 | PVVCY_0602320 | 6.091  | 5.475  | 4.826  | 5.316  | conserved Plasmodium protein, unknown function                 |
| PF3D7_0813400 | PVVCY_1402600 | 9.160  | 8.549  | 7.976  | 8.079  | conserved Plasmodium protein, unknown function                 |
| PF3D7_1020000 | PVVCY_0500470 | 6.718  | 6.295  | 5.283  | 6.289  | RNA-binding protein 34, putative                               |
| PF3D7_0208200 | PVVCY_0300630 | 6.968  | 6.612  | 5.906  | 6.424  | KRR1 small subunit processome component, putative              |
| PF3D7_0528200 | PVVCY_1204370 | 7.800  | 7.590  | 7.242  | 7.018  | eukaryotic translation initiation factor 3 subunit E, putative |
| PF3D7_1241800 | PVVCY_1405740 | 7.730  | 6.893  | 6.369  | 7.233  | ATP-dependent RNA helicase DBP9, putative                      |
| PF3D7_1311800 | PVVCY_1401420 | 11.945 | 11.400 | 10.466 | 10.848 | M1-family alanyl aminopeptidase, putative                      |
| PF3D7_1224400 | PVVCY_1404140 | 6.340  | 5.728  | 5.100  | 5.526  | conserved Plasmodium protein, unknown function                 |
| PF3D7_1447200 | PVVCY_1301260 | 5.933  | 6.094  | 6.191  | 6.190  | conserved Plasmodium protein, unknown function                 |
| PF3D7_1438600 | PVVCY_1300430 | 7.453  | 7.324  | 6.804  | 6.379  | conserved protein, unknown function                            |
| PF3D7_0703700 | PVVCY_1000270 | 10.815 | 10.980 | 10.283 | 9.908  | conserved Plasmodium protein, unknown function                 |
| PF3D7_1133100 | PVVCY_0903180 | 6.344  | 5.780  | 5.047  | 5.684  | conserved Plasmodium protein, unknown function                 |
| PF3D7_1332800 | PVVCY_1305030 | 8.076  | 7.831  | 7.266  | 7.202  | eukaryotic translation initiation factor 6, putative           |
| PF3D7_0524000 | PVVCY_1203950 | 10.179 | 9.600  | 9.373  | 9.229  | karyopherin beta, putative                                     |
| PF3D7_0405500 | PVVCY_0800350 | 6.837  | 6.568  | 6.350  | 6.066  | conserved Plasmodium protein, unknown function                 |
| PF3D7_0802300 | PVVCY_1202890 | 6.104  | 5.413  | 5.169  | 5.431  | periodic tryptophan protein 2, putative                        |
| PF3D7_1359000 | PVVCY_1103650 | 5.341  | 4.674  | 3.948  | 4.574  | conserved Plasmodium protein, unknown function                 |
| PF3D7_0629500 | PVVCY_1102940 | 8.717  | 8.421  | 7.344  | 7.276  | amino acid transporter, putative                               |
| PF3D7_1342000 | PVVCY_1305820 | 11.686 | 11.486 | 11.033 | 11.030 | 40S ribosomal protein S6, putative                             |
| PF3D7_1009200 | PVVCY_1200830 | 5.813  | 5.665  | 5.034  | 4.483  | conserved Plasmodium protein, unknown function                 |

|               |               |        |        |        |        |                                                                      |
|---------------|---------------|--------|--------|--------|--------|----------------------------------------------------------------------|
| PF3D7_0903400 | PVVCY_0401910 | 7.741  | 7.423  | 6.737  | 6.472  | DEAD DEAH box helicase, putative                                     |
| PF3D7_1125900 | PVVCY_0902400 | 7.707  | 8.100  | 8.049  | 7.435  | conserved Plasmodium protein, unknown function                       |
| PF3D7_1136600 | PVVCY_0903510 | 7.274  | 6.742  | 5.920  | 6.493  | conserved Plasmodium protein, unknown function                       |
| PF3D7_1202700 | PVVCY_0600190 | 7.247  | 7.134  | 7.021  | 7.510  | conserved Plasmodium protein, unknown function                       |
| PF3D7_0903400 | PVVCY_0401910 | 7.741  | 7.423  | 6.737  | 6.472  | DEAD DEAH box helicase, putative                                     |
| PF3D7_0526300 | PVVCY_1204180 | 5.442  | 5.487  | 5.907  | 5.821  | nucleolar Jumonji domain interacting protein, putative               |
| PF3D7_0417100 | PVVCY_0701890 | 0.866  | 0.684  | 0.520  | 0.704  | mRNA-binding protein PUF2, putative                                  |
| PF3D7_1405900 | PVVCY_1004170 | 6.783  | 6.350  | 5.198  | 6.383  | RNA-binding protein, putative                                        |
| PF3D7_0708100 | PVVCY_1000710 | 9.574  | 9.006  | 8.810  | 8.335  | DNA-directed RNA polymerases I, II, and III subunit RPABC5, putative |
| PF3D7_0218400 | PVVCY_0301600 | 6.873  | 6.523  | 6.129  | 6.561  | ATP-dependent RNA helicase DDX47, putative                           |
| PF3D7_1425900 | PVVCY_1002360 | 7.632  | 7.458  | 7.020  | 6.853  | conserved Plasmodium protein, unknown function                       |
| PF3D7_0825500 | PVVCY_0700500 | 6.976  | 6.538  | 5.592  | 6.740  | protein KRI1, putative                                               |
| PF3D7_1227800 | PVVCY_1404460 | 7.285  | 6.750  | 5.905  | 6.403  | histone acetyltransferase, putative                                  |
| PF3D7_1227800 | PVVCY_1404460 | 7.285  | 6.750  | 5.905  | 6.403  | histone acetyltransferase, putative                                  |
| PF3D7_1027100 | PVVCY_0501170 | 7.054  | 6.520  | 5.622  | 6.937  | U3 small nucleolar ribonucleoprotein protein MPP10, putative         |
| PF3D7_0715000 | PVVCY_1402310 | 8.208  | 8.174  | 7.679  | 6.943  | 4-nitrophenylphosphatase, putative                                   |
| PF3D7_1464400 | PVVCY_1303020 | 9.396  | 9.247  | 8.957  | 8.711  | zinc finger protein, putative                                        |
| PF3D7_1361000 | PVVCY_1103820 | 6.118  | 5.888  | 5.224  | 4.538  | protein arginine N-methyltransferase 5, putative                     |
| PF3D7_0813400 | PVVCY_1402600 | 9.160  | 8.549  | 7.976  | 8.079  | conserved Plasmodium protein, unknown function                       |
| PF3D7_0903400 | PVVCY_0401910 | 7.741  | 7.423  | 6.737  | 6.472  | DEAD DEAH box helicase, putative                                     |
| PF3D7_0208300 | PVVCY_0300640 | 4.520  | 3.969  | 3.443  | 3.511  | conserved Plasmodium protein, unknown function                       |
| PF3D7_1470200 | PVVCY_1303590 | 4.814  | 4.428  | 4.116  | 4.438  | conserved Plasmodium protein, unknown function                       |
| PF3D7_1359000 | PVVCY_1103650 | 5.341  | 4.674  | 3.948  | 4.574  | conserved Plasmodium protein, unknown function                       |
| PF3D7_0106700 | PVVCY_0200640 | 6.863  | 6.267  | 5.361  | 6.039  | asparagine and aspartate rich protein 2, putative                    |
| PF3D7_0610900 | PVVCY_0101060 | 7.373  | 7.278  | 7.265  | 7.332  | transcription elongation factor SPT5, putative                       |
| PF3D7_0610800 | PVVCY_0101050 | 8.343  | 8.520  | 8.765  | 7.851  | transketolase, putative                                              |
| PF3D7_1302700 | PVVCY_1400290 | 6.352  | 5.428  | 5.224  | 5.829  | ATP-dependent RNA helicase DHR1, putative                            |
| PF3D7_1244100 | PVVCY_1405950 | 7.007  | 6.565  | 5.830  | 5.385  | N-alpha-acetyltransferase 15, NatA auxiliary subunit, putative       |
| PF3D7_0422400 | PVVCY_0502350 | 11.726 | 11.886 | 11.224 | 11.228 | 40S ribosomal protein S19, putative                                  |
| PF3D7_1121600 | PVVCY_0901960 | 11.265 | 11.441 | 11.962 | 12.108 | circumsporozoite-related antigen exported protein 1, putative        |
| PF3D7_1321300 | PVVCY_1402110 | 4.121  | 3.576  | 3.380  | 3.760  | conserved Plasmodium protein, unknown function                       |
| PF3D7_0903400 | PVVCY_0401910 | 7.741  | 7.423  | 6.737  | 6.472  | DEAD DEAH box helicase, putative                                     |
| PF3D7_1208100 | PVVCY_0600690 | 5.165  | 4.352  | 3.530  | 4.242  | conserved Plasmodium protein, unknown function                       |
| PF3D7_1009800 | PVVCY_1200890 | 4.917  | 4.901  | 4.005  | 3.665  | conserved Plasmodium protein, unknown function                       |
| PF3D7_1461200 | PVVCY_1302640 | 7.395  | 7.140  | 6.599  | 7.089  | U3 small nucleolar ribonucleoprotein protein IMP3, putative          |

|               |               |       |       |       |       |                                                           |
|---------------|---------------|-------|-------|-------|-------|-----------------------------------------------------------|
| PF3D7_1431300 | PVVCY_1001830 | 6.884 | 6.384 | 5.942 | 6.515 | large subunit GTPase 1, putative                          |
| PF3D7_1119200 | PVVCY_0901740 | 6.466 | 6.013 | 5.379 | 6.054 | conserved protein, unknown function                       |
| PF3D7_0906500 | PVVCY_0401590 | 8.800 | 7.916 | 6.403 | 7.612 | arginase, putative                                        |
| PF3D7_1030400 | PVVCY_0501490 | 1.502 | 1.887 | 1.042 | 1.645 | conserved Plasmodium protein, unknown function            |
| PF3D7_0722300 | PVVCY_0602010 | 6.505 | 6.417 | 5.320 | 5.433 | zinc finger protein, putative                             |
| PF3D7_0531400 | PVVCY_1204680 | 5.406 | 5.238 | 5.279 | 4.963 | conserved Plasmodium protein, unknown function            |
| PF3D7_0729300 | PVVCY_0201310 | 8.067 | 7.466 | 7.086 | 7.482 | 60S ribosomal export protein NMD3, putative               |
| PF3D7_1419700 | PVVCY_1002840 | 7.093 | 7.592 | 6.466 | 6.407 | conserved Plasmodium protein, unknown function            |
| PF3D7_1029200 | PVVCY_0501370 | 5.560 | 5.313 | 3.921 | 5.042 | WD repeat-containing protein, putative                    |
| PF3D7_0906300 | PVVCY_0401610 | 5.244 | 6.081 | 6.943 | 6.467 | Maf-like protein, putative                                |
| PF3D7_1466700 | PVVCY_1303260 | 6.628 | 6.285 | 5.285 | 6.566 | 60S ribosome subunit biogenesis protein NIP7, putative    |
| PF3D7_0819000 | PVVCY_0701160 | 6.522 | 6.537 | 6.303 | 6.289 | conserved Plasmodium protein, unknown function            |
| PF3D7_0918800 | PVVCY_0801710 | 7.297 | 6.742 | 6.069 | 6.293 | dihydrouridine synthase, putative                         |
| PF3D7_1225500 | PVVCY_1404250 | 6.738 | 6.053 | 5.113 | 6.172 | small subunit rRNA processing factor, putative            |
| PF3D7_0217700 | PVVCY_0301530 | 7.155 | 7.017 | 6.559 | 6.552 | E2F-associated phosphoprotein, putative                   |
| PF3D7_1105700 | PVVCY_0900510 | 7.524 | 7.510 | 7.189 | 6.250 | tRNA-splicing ligase RtcB, putative                       |
| PF3D7_0510400 | PVVCY_1101090 | 6.267 | 5.994 | 5.253 | 5.550 | conserved Plasmodium protein, unknown function            |
| PF3D7_0218500 | PVVCY_0301610 | 9.716 | 9.900 | 9.839 | 9.312 | small nuclear ribonucleoprotein Sm D2, putative           |
| PF3D7_0630900 | PVVCY_1103080 | 6.904 | 6.019 | 5.637 | 6.716 | ATP-dependent RNA helicase HAS1, putative                 |
| PF3D7_0918800 | PVVCY_0801710 | 7.297 | 6.742 | 6.069 | 6.293 | dihydrouridine synthase, putative                         |
| PF3D7_1118500 | PVVCY_0901670 | 8.602 | 8.246 | 7.125 | 7.769 | nucleolar protein 56, putative                            |
| PF3D7_0218400 | PVVCY_0301600 | 6.873 | 6.523 | 6.129 | 6.561 | ATP-dependent RNA helicase DDX47, putative                |
| PF3D7_1340300 | PVVCY_1305670 | 6.259 | 5.911 | 4.773 | 5.792 | nucleolar complex protein 2, putative                     |
| PF3D7_1466700 | PVVCY_1303260 | 6.628 | 6.285 | 5.285 | 6.566 | 60S ribosome subunit biogenesis protein NIP7, putative    |
| PF3D7_1470300 | PVVCY_1303600 | 6.010 | 5.574 | 6.201 | 6.446 | conserved Plasmodium protein, unknown function            |
| PF3D7_0717400 | PVVCY_0601540 | 6.084 | 5.676 | 4.548 | 4.578 | queuine tRNA-ribosyltransferase, putative                 |
| PF3D7_1354400 | PVVCY_1103210 | 9.480 | 9.257 | 8.960 | 8.820 | V-type proton ATPase 21 kDa proteolipid subunit, putative |
| PF3D7_1126500 | PVVCY_0902450 | 6.610 | 5.960 | 5.092 | 5.681 | conserved Plasmodium protein, unknown function            |
| PF3D7_1020700 | PVVCY_0500540 | 6.327 | 5.714 | 4.770 | 5.729 | histone acetyltransferase, putative                       |
| PF3D7_1137300 | PVVCY_0903580 | 6.092 | 6.168 | 5.804 | 5.609 | CLPTM1 domain-containing protein, putative                |
| PF3D7_1311000 | PVVCY_1401120 | 7.556 | 7.590 | 7.031 | 6.874 | protein ISD11, putative                                   |
| PF3D7_1367600 | PVVCY_1104450 | 7.097 | 6.574 | 5.968 | 6.945 | ribosome biogenesis protein MRT4, putative                |
| PF3D7_1454200 | PVVCY_1301940 | 6.294 | 6.017 | 5.359 | 5.288 | conserved Plasmodium protein, unknown function            |
| PF3D7_0703900 | PVVCY_1000290 | 5.022 | 4.534 | 3.974 | 4.169 | conserved Plasmodium protein, unknown function            |
| PF3D7_0703900 | PVVCY_1000290 | 5.022 | 4.534 | 3.974 | 4.169 | conserved Plasmodium protein, unknown function            |
| PF3D7_1333600 | PVVCY_1305100 | 6.588 | 5.707 | 5.290 | 5.647 | U3 small nucleolar RNA-associated protein 4, putative     |
| PF3D7_1105700 | PVVCY_0900510 | 7.524 | 7.510 | 7.189 | 6.250 | tRNA-splicing ligase RtcB, putative                       |

|               |               |        |        |        |        |                                                                 |
|---------------|---------------|--------|--------|--------|--------|-----------------------------------------------------------------|
| PF3D7_0216100 | PVVCY_0301370 | 3.969  | 4.550  | 3.776  | 2.719  | conserved Plasmodium protein, unknown function                  |
| PF3D7_0920800 | PVVCY_0801910 | 8.921  | 8.956  | 8.362  | 7.739  | inosine-5'-monophosphate dehydrogenase, putative                |
| PF3D7_0602100 | PVVCY_0100230 | 6.862  | 6.110  | 5.678  | 6.146  | ATP-dependent RNA helicase, putative                            |
| PF3D7_1319300 | PVVCY_1401930 | 8.461  | 7.799  | 6.789  | 7.233  | N2,N2-dimethylguanosine tRNA methyltransferase, putative        |
| PF3D7_1338200 | PVVCY_1305470 | 11.221 | 11.127 | 10.273 | 10.550 | 60S ribosomal protein L6-2, putative                            |
| PF3D7_0418100 | PVVCY_0701990 | 6.979  | 6.744  | 6.127  | 6.207  | conserved Plasmodium protein, unknown function                  |
| PF3D7_0307200 | PVVCY_0400620 | 11.855 | 11.872 | 11.229 | 11.187 | 60S ribosomal protein L7, putative                              |
| PF3D7_1126400 | PVVCY_1402590 | 6.656  | 7.306  | 6.985  | 6.099  | large ribosomal subunit processing factor, putative             |
| PF3D7_1018700 | PVVCY_0500340 | 7.875  | 7.983  | 7.265  | 7.157  | conserved Plasmodium protein, unknown function                  |
| PF3D7_1349400 | PVVCY_1306530 | 6.255  | 6.134  | 5.741  | 5.001  | cytidine and deoxycytidylate deaminase, putative                |
| PF3D7_1458800 | PVVCY_1302400 | 5.840  | 5.647  | 5.017  | 5.438  | DNA-directed RNA polymerase III subunit RPC5, putative          |
| PF3D7_0216100 | PVVCY_0301370 | 3.969  | 4.550  | 3.776  | 2.719  | conserved Plasmodium protein, unknown function                  |
| PF3D7_1234500 | PVVCY_1405120 | 6.488  | 6.777  | 6.083  | 5.367  | conserved Plasmodium protein, unknown function                  |
| PF3D7_0528800 | PVVCY_1204430 | 5.959  | 6.098  | 5.024  | 5.691  | nucleolar preribosomal GTPase, putative                         |
| PF3D7_1030700 | PVVCY_0501520 | 6.577  | 6.489  | 5.462  | 5.269  | RNA methyltransferase, putative                                 |
| PF3D7_0703900 | PVVCY_1000290 | 5.022  | 4.534  | 3.974  | 4.169  | conserved Plasmodium protein, unknown function                  |
| PF3D7_0524400 | PVVCY_1203990 | 8.300  | 8.212  | 7.713  | 7.113  | ribosome-interacting GTPase 1, putative                         |
| PF3D7_1028400 | PVVCY_0501300 | 6.753  | 6.100  | 5.244  | 6.441  | nucleolar preribosomal assembly protein, putative               |
| PF3D7_0729400 | PVVCY_0201320 | 7.659  | 7.438  | 6.544  | 7.052  | ribosome biogenesis protein BRX1 homolog, putative              |
| PF3D7_1461600 | PVVCY_1302680 | 7.528  | 7.123  | 7.339  | 7.225  | splicing factor 3B subunit 2, putative                          |
| PF3D7_1461200 | PVVCY_1302640 | 7.395  | 7.140  | 6.599  | 7.089  | U3 small nucleolar ribonucleoprotein protein IMP3, putative     |
| PF3D7_0312800 | PVVCY_0401160 | 11.585 | 11.348 | 11.029 | 10.880 | 60S ribosomal protein L26, putative                             |
| PF3D7_1469300 | PVVCY_1303500 | 8.397  | 8.047  | 7.370  | 7.688  | pre-rRNA-processing protein PNO1, putative                      |
| PF3D7_0206600 | PVVCY_0300520 | 7.136  | 7.099  | 6.265  | 6.600  | DNA-directed RNA polymerase III subunit RPC10, putative         |
| PF3D7_1107700 | PVVCY_0900710 | 6.977  | 6.362  | 5.918  | 6.366  | pescafillo homolog, putative                                    |
| PF3D7_1247900 | PVVCY_1406290 | 5.518  | 5.263  | 4.364  | 5.368  | nucleolar rRNA processing protein, putative                     |
| PF3D7_1006800 | PVVCY_1200570 | 11.330 | 11.103 | 10.314 | 10.081 | single-strand telomeric DNA-binding protein GBP2, putative      |
| PF3D7_1347500 | PVVCY_1306340 | 11.105 | 10.815 | 10.563 | 9.842  | DNA_RNA-binding protein Alba 4, putative                        |
| PF3D7_1468700 | PVVCY_1303440 | 11.117 | 10.922 | 10.518 | 10.142 | helicase 45, putative eukaryotic initiation factor 4a, putative |
| PF3D7_1323900 | PVVCY_1304170 | 4.926  | 5.239  | 3.743  | 4.550  | protein BCP1, putative                                          |
| PF3D7_1411500 | PVVCY_1003640 | 5.825  | 5.167  | 4.832  | 5.601  | conserved Plasmodium protein, unknown function                  |
| PF3D7_0410400 | PVVCY_0800830 | 7.081  | 7.038  | 6.722  | 6.458  | exosome complex component RRP4, putative                        |
| PF3D7_0729300 | PVVCY_0201310 | 8.067  | 7.466  | 7.086  | 7.482  | 60S ribosomal export protein NMD3, putative                     |
| PF3D7_1229000 | PVVCY_1404570 | 4.347  | 4.337  | 4.327  | 3.506  | conserved Plasmodium protein, unknown function                  |
| PF3D7_1461600 | PVVCY_1302680 | 7.528  | 7.123  | 7.339  | 7.225  | splicing factor 3B subunit 2, putative                          |

|               |               |        |        |        |        |                                                                      |
|---------------|---------------|--------|--------|--------|--------|----------------------------------------------------------------------|
| PF3D7_0703900 | PVVCY_1000290 | 5.022  | 4.534  | 3.974  | 4.169  | conserved Plasmodium protein, unknown function                       |
| PF3D7_0405000 | PVVCY_0800300 | 5.923  | 5.378  | 4.640  | 5.411  | ATP-dependent RNA helicase DDX51, putative                           |
| PF3D7_1437900 | PVVCY_0601100 | 9.833  | 9.492  | 9.159  | 9.120  | HSP40, subfamily A, putative                                         |
| PF3D7_1346300 | PVVCY_1306230 | 10.009 | 9.854  | 9.374  | 9.264  | DNA_RNA-binding protein Alba 2, putative                             |
| PF3D7_0522800 | PVVCY_1203830 | 8.275  | 8.126  | 7.665  | 7.165  | pre-mRNA-splicing factor BUD31, putative                             |
| PF3D7_0727200 | PVVCY_0201100 | 6.228  | 5.976  | 5.299  | 5.218  | cysteine desulfurase, putative                                       |
| PF3D7_0721300 | PVVCY_0601910 | 6.103  | 5.716  | 5.290  | 5.530  | ATP-dependent RNA helicase DBP7, putative                            |
| PF3D7_1364800 | PVVCY_1104170 | 8.769  | 8.699  | 8.351  | 8.022  | DNA-directed RNA polymerases I, II, and III subunit RPABC1, putative |
| PF3D7_1146000 | PVVCY_0904430 | 6.563  | 6.044  | 5.408  | 6.169  | ribosome assembly protein 4, putative                                |
| PF3D7_0802400 | PVVCY_1202880 | 6.252  | 6.288  | 6.041  | 6.115  | conserved Plasmodium protein, unknown function                       |
| PF3D7_0727200 | PVVCY_0201100 | 6.228  | 5.976  | 5.299  | 5.218  | cysteine desulfurase, putative                                       |
| PF3D7_0310600 | PVVCY_0400940 | 7.521  | 8.119  | 7.088  | 6.994  | eukaryotic translation initiation factor 3 subunit K, putative       |
| PF3D7_1126200 | PVVCY_0902430 | 12.100 | 12.221 | 11.627 | 11.577 | 40S ribosomal protein S18, putative                                  |
| PF3D7_1354300 | PVVCY_1103200 | 8.065  | 7.580  | 6.895  | 7.888  | methyltransferase, putative                                          |
