# Supplementary material for: A fast and cost-effective microsampling protocol incorporating reduced animal usage for time-series transcriptomics in rodent malaria parasites
Source: PubMed Central journal article supplement (PMC6347755; doi:10.1186/s12936-019-2659-4), 2019-01-25
Supplement: 12936_2019_2659_MOESM5_ESM.pdf [file 12936_2019_2659_MOESM5_ESM.pdf]

**Additional file 5.** RNA polymerases and invasion related genes whose expression profiles are shown in Figure 2B.

| Gene_id       | Product                                                         | Gene Set       |
|---------------|-----------------------------------------------------------------|----------------|
| PVVCY_0300520 | DNA-directed RNA polymerase III subunit RPC10, putative         | RNA polymerase |
| PVVCY_0600560 | DNA-directed RNA polymerase III subunit RPC2, putative          | RNA polymerase |
| PVVCY_0700850 | mediator of RNA polymerase II transcription subunit 7, putative | RNA polymerase |
| PVVCY_0900400 | DNA-directed RNA polymerase III subunit RPC8, putative          | RNA polymerase |
| PVVCY_0902330 | DNA-directed RNA polymerase, putative                           | RNA polymerase |
| PVVCY_0902340 | DNA-directed RNA polymerase, putative                           | RNA polymerase |
| PVVCY_0904160 | DNA-directed RNA polymerases I and III subunit RPAC1, putative  | RNA polymerase |
| PVVCY_1002680 | DNA-directed RNA polymerase III subunit RPC6, putative          | RNA polymerase |
| PVVCY_1004350 | DNA-directed RNA polymerase II subunit RPB4, putative           | RNA polymerase |
| PVVCY_1103120 | RNA polymerase II transcription factor B subunit 4, putative    | RNA polymerase |
| PVVCY_1302400 | DNA-directed RNA polymerase III subunit RPC5, putative          | RNA polymerase |
| PVVCY_1302850 | DNA-directed RNA polymerase III subunit RPC4, putative          | RNA polymerase |
| PVVCY_1304670 | DNA-directed RNA polymerase III subunit RPC1, putative          | RNA polymerase |
| PVVCY_0101290 | rhostry protein ROP14, putative                                 | invasion       |
| PVVCY_0101440 | erythrocyte membrane antigen 1                                  | invasion       |
| PVVCY_0300580 | serine repeat antigen 4, putative                               | invasion       |
| PVVCY_0300610 | serine repeat antigen 2, putative                               | invasion       |
| PVVCY_0301260 | rhostry neck protein 6, putative                                | invasion       |
| PVVCY_0500180 | rhostry neck protein 12, putative                               | invasion       |
| PVVCY_0500650 | schizont egress antigen-1, putative                             | invasion       |
| PVVCY_0602000 | rhostry-associated leucine zipper-like protein 1, putative      | invasion       |
| PVVCY_0700020 | erythrocyte membrane antigen 1                                  | invasion       |
| PVVCY_0700180 | GPI-anchored micronemal antigen, putative                       | invasion       |
| PVVCY_0701290 | rhostry neck protein 5, putative                                | invasion       |
| PVVCY_0701670 | armadillo-domain containing rhostry protein, putative           | invasion       |
| PVVCY_0802870 | merozoite surface protein 1                                     | invasion       |
| PVVCY_0900210 | erythrocyte membrane antigen 1                                  | invasion       |
| PVVCY_0901420 | rhostry neck protein 4, putative                                | invasion       |
| PVVCY_0903210 | apical membrane antigen 1, putative                             | invasion       |
| PVVCY_0903550 | subtilisin-like protease 2, putative                            | invasion       |
| PVVCY_1000120 | erythrocyte membrane antigen 1                                  | invasion       |
| PVVCY_1000620 | rhostry-associated membrane antigen, putative                   | invasion       |
| PVVCY_1003750 | rhostry-associated protein 1, putative                          | invasion       |
| PVVCY_1100230 | rhostry-associated protein 2/3, putative                        | invasion       |
| PVVCY_1100800 | subtilisin-like protease 1, putative                            | invasion       |
| PVVCY_1102040 | merozoite surface protein 10, putative                          | invasion       |
| PVVCY_1201140 | rhostry associated adhesin, putative                            | invasion       |

|               |                                  |          |
|---------------|----------------------------------|----------|
| PVVCY_1301730 | rhoptry neck protein 2, putative | invasion |
| PVVCY_1400190 | erythrocyte membrane antigen 1   | invasion |
| PVVCY_1406710 | rhoptry neck protein 3, putative | invasion |
